# Supplementary material for: Adjusting eye aspect ratio for strong eye blink detection based on facial landmarks
Source: PeerJ Comput Sci. 2022 Apr 18;8:e943. doi: 10.7717/peerj-cs.943 (PMC9044337; doi:10.7717/peerj-cs.943)
Supplement: Supplemental Information 7 [file peerj-cs-08-943-s007.xlsx]

## Sheet: talking avi data
	A	B	C	EAR
1	9.0554	9.2195	29.4279	0.3105
2	9.0554	9.0554	30.2655	0.2992
3	9.0554	10.198	29.4279	0.3271
4	10.0499	10.198	30.4138	0.3329
5	9.0554	10.198	29.4279	0.3271
6	10.0499	10.198	30.4138	0.3329
7	10.198	10.0499	29.4279	0.344
8	10.0499	10.0499	30.4138	0.3304
9	8.0623	9.2195	29.2746	0.2952
10	10.0499	9.2195	30.2655	0.3183
11	9.0554	10.198	30.4138	0.3165
12	10.0499	9.0554	30.4138	0.3141
13	9.0554	10.198	29.4279	0.3271
14	10.198	10.0499	29.4279	0.344
15	9.2195	10.0499	29.4279	0.3274
16	10.0499	9.0554	29.4279	0.3246
17	9.2195	10.198	29.4279	0.3299
18	10.0499	9.2195	30.4138	0.3168
19	9.2195	10.198	29.4279	0.3299
20	9.0554	9.2195	29.4279	0.3105
21	9.0554	10.0499	30.4138	0.3141
22	9.0554	9.0554	30.2655	0.2992
23	9.0554	10.198	30.4138	0.3165
24	9.0554	9.2195	30.2655	0.3019
25	9.0554	10.0499	29.4279	0.3246
26	10.0499	9.0554	30.4138	0.3141
27	9.0554	10.198	29.4279	0.3271
28	10.0499	10.198	31.257	0.3239
29	9.2195	10.198	29.4279	0.3299
30	9.0554	9.0554	30.2655	0.2992
31	9.0554	9.2195	30.2655	0.3019
32	9.0554	9.0554	30.4138	0.2977
33	9.0554	9.0554	29.2746	0.3093
34	9.0554	9.0554	30.4138	0.2977
35	9.2195	10.0499	29.2746	0.3291
36	9	9.0554	30.2655	0.2983
37	9.0554	9.0554	29.2746	0.3093
38	9.0554	8.0623	30.2655	0.2828
39	8.0623	9.0554	29.2746	0.2924
40	9.0554	9.0554	30.2655	0.2992
41	8.2462	9.0554	29.2746	0.2955
42	9.0554	9.0554	30.2655	0.2992
43	8.0623	9.0554	29.4279	0.2908
44	9.0554	9.0554	30.2655	0.2992
45	8.0623	8.0623	28.2843	0.285
46	9.0554	8.0623	29.2746	0.2924
47	8.0623	9.0554	28.2843	0.3026
48	9.0554	9.0554	29.2746	0.3093
49	8.2462	8.2462	28.2843	0.2915
50	8.0623	9.0554	29.2746	0.2924
51	8.0623	9.0554	28.2843	0.3026
52	8.0623	8.0623	29.4279	0.274
53	7.0711	8.2462	27.2947	0.2806
54	7.0711	8.0623	28.2843	0.2675
55	7.2801	8.2462	28.2843	0.2745
56	8.0623	8.0623	29.2746	0.2754
57	8.2462	8.0623	28.2843	0.2883
58	7.0711	8.0623	29.2746	0.2585
59	7.0711	8.0623	27.1662	0.2785
60	8.0623	8.0623	29.2746	0.2754
61	7.0711	7.0711	27.1662	0.2603
62	8.0623	8.0623	29.1548	0.2765
63	7.0711	7.0711	27.1662	0.2603
64	7.0711	7.0711	29.1548	0.2425
65	7.0711	7.0711	28.1603	0.2511
66	7.0711	7	28.1603	0.2498
67	7.2801	7.0711	28.1603	0.2548
68	8.0623	7.0711	28.1603	0.2687
69	6.0828	7.0711	28.2843	0.2325
70	7.0711	7.0711	28.2843	0.25
71	6.0828	7.0711	27.2947	0.241
72	7.0711	7.0711	28.2843	0.25
73	7.0711	8.0623	27.2947	0.2772
74	7	8.0623	28.2843	0.2663
75	7.0711	8.0623	27.2947	0.2772
76	7.0711	8.0623	29.2746	0.2585
77	6.0828	6.0828	27.2947	0.2229
78	6.0828	6.0828	28.2843	0.2151
79	6.0828	6.0828	27.4591	0.2215
80	6.0828	7	28.2843	0.2313
81	6.0828	7.2801	28.4429	0.2349
82	7.0711	7.0711	29.1548	0.2425
83	6.0828	6.0828	27.2947	0.2229
84	7.0711	7.0711	28.2843	0.25
85	7.2801	7.0711	28.4429	0.2523
86	7.0711	8	29.2746	0.2574
87	6.0828	7.0711	27.6586	0.2378
88	8.0623	7.0711	29.2746	0.2585
89	6.0828	6.3246	27.6586	0.2243
90	6.0828	7.0711	29.1548	0.2256
91	7.2801	7.2801	28.6356	0.2542
92	7.0711	7.0711	29.2746	0.2415
93	6.3246	7.2801	27.6586	0.2459
94	7.0711	7.0711	29.2746	0.2415
95	7.2801	7.0711	28.6356	0.2506
96	7.0711	7.2801	29.4279	0.2438
97	5.099	6.0828	27.4591	0.2036
98	6.0828	5.3852	28.2843	0.2027
99	4.1231	5.099	27.4591	0.1679
100	5.099	5.099	29.2746	0.1742
101	4.4721	4.4721	28.4429	0.1572
102	4.1231	4.1231	29.2746	0.1408
103	5.3852	5.3852	27.4591	0.1961
104	5.099	5.099	29.2746	0.1742
105	5.3852	5.3852	27.4591	0.1961
106	6.3246	5.099	29.4279	0.1941
107	4.1231	5.099	27.4591	0.1679
108	6.0828	5.3852	28.4429	0.2016
109	5.3852	5.3852	26.6833	0.2018
110	5.099	5.099	28.4429	0.1793
111	5.3852	5.3852	28.6356	0.1881
112	6.3246	6.0828	28.4429	0.2181
113	5.3852	5.3852	28.6356	0.1881
114	6.0828	6.3246	28.4429	0.2181
115	6.7082	5.3852	27.8927	0.2168
116	5.3852	5.3852	28.6356	0.1881
117	5.3852	6.3246	28.1603	0.2079
118	6.3246	6.3246	28.8617	0.2191
119	5.3852	5	27.2029	0.1909
120	6.7082	5.3852	28.8617	0.2095
121	5.831	5.831	27.2029	0.2144
122	5.3852	6.3246	27.8927	0.2099
123	6.7082	6.7082	27.8927	0.2405
124	6.7082	6.3246	28.8617	0.2258
125	6.7082	6.3246	28.1603	0.2314
126	7.2801	7.2801	29.8329	0.244
127	6.7082	6.3246	27.8927	0.2336
128	7.2801	6.3246	28.8617	0.2357
129	7.6158	6.3246	28.8617	0.2415
130	7.2801	6.7082	29.6142	0.2362
131	7.2801	6.3246	29.1204	0.2336
132	7.0711	7.2801	29.8329	0.2405
133	7.2801	7.6158	28.8617	0.2581
134	7.2801	7.2801	28.6356	0.2542
135	7.6158	7.2801	29.1204	0.2558
136	8.0623	7.2801	29.6142	0.259
137	7.2801	8.2462	29.1204	0.2666
138	8.2462	7.2801	29.8329	0.2602
139	7.6158	8.2462	29.1204	0.2724
140	7.0711	7.2801	29.6142	0.2423
141	7.2801	7.2801	27.8927	0.261
142	7.2801	7.0711	29.6142	0.2423
143	7.2801	8.2462	28.8617	0.269
144	8.2462	7.2801	29.6142	0.2621
145	7.2801	8.2462	29.8329	0.2602
146	8.2462	7.2801	29.8329	0.2602
147	8.2462	8.2462	28.1603	0.2928
148	8.2462	8.2462	29.6142	0.2785
149	6.3246	7.2801	29.1204	0.2336
150	7.2801	8.2462	29.6142	0.2621
151	8.2462	8.2462	29.1204	0.2832
152	7.2801	8.2462	29.6142	0.2621
153	7.2801	8.2462	29.1204	0.2666
154	8.2462	8.2462	29.6142	0.2785
155	8.2462	8.2462	28.8617	0.2857
156	8.0623	8.2462	29.8329	0.2733
157	8.2462	9.2195	28.8617	0.3026
158	8.2462	9.2195	28.8617	0.3026
159	8.2462	8.2462	28.8617	0.2857
160	8.0623	8.2462	28.6356	0.2848
161	8.2462	9.2195	29.8329	0.2927
162	8.2462	8.2462	29.8329	0.2764
163	8.2462	8.2462	29.8329	0.2764
164	8.2462	8.2462	29.6142	0.2785
165	8.2462	9.2195	28.8617	0.3026
166	8.0623	9.2195	29.6142	0.2918
167	9.2195	9.2195	28.8617	0.3194
168	9.2195	9.2195	29.6142	0.3113
169	8.0623	8.0623	28.8617	0.2793
170	9.2195	8.0623	28.6356	0.3018
171	8.2462	9.2195	29.8329	0.2927
172	9.0554	9.0554	29.4279	0.3077
173	8.2462	9.2195	29.6142	0.2949
174	9.2195	8.2462	30.5941	0.2854
175	8.2462	8.0623	29.6142	0.2753
176	9.2195	8.2462	29.6142	0.2949
177	8.0623	9.2195	28.8617	0.2994
178	9.2195	9.2195	29.6142	0.3113
179	8.2462	9.2195	29.6142	0.2949
180	9.0554	9.0554	29.4279	0.3077
181	9.2195	9.0554	29.6142	0.3086
182	9.0554	8.2462	30.5941	0.2828
183	9.2195	10.198	30.5941	0.3173
184	10.0499	10.198	30.4138	0.3329
185	9.2195	10.198	29.6142	0.3278
186	9.2195	9.2195	29.6142	0.3113
187	9.2195	9.2195	29.6142	0.3113
188	9.2195	9.2195	29.4279	0.3133
189	9.0554	9.2195	29.4279	0.3105
190	9.0554	9.2195	30.4138	0.3004
191	9.2195	9.0554	29.4279	0.3105
192	9.0554	9.2195	29.4279	0.3105
193	9.2195	10.198	29.6142	0.3278
194	10.0499	9.2195	30.4138	0.3168
195	9.0554	9.2195	29.6142	0.3086
196	9.2195	9.0554	30.4138	0.3004
197	9.2195	9.2195	29.4279	0.3133
198	10.0499	10.198	30.2655	0.3345
199	9.0554	10.198	29.4279	0.3271
200	10.0499	10.198	29.2746	0.3458
201	10.198	9.2195	29.4279	0.3299
202	10.198	10.0499	30.4138	0.3329
203	10.198	10.198	29.4279	0.3465
204	10.0499	10.198	30.2655	0.3345
205	10.198	10.0499	29.4279	0.344
206	10.0499	10.198	30.2655	0.3345
207	10.0499	10.198	30.4138	0.3329
208	10.0499	10.0499	30.2655	0.3321
209	9.0554	9.2195	29.2746	0.3121
210	10.198	9.0554	30.2655	0.3181
211	9.0554	10.198	29.4279	0.3271
212	10.0499	10.198	29.2746	0.3458
213	9.0554	10.198	29.4279	0.3271
214	9.0554	9.2195	30.4138	0.3004
215	9.2195	9.0554	29.4279	0.3105
216	9.0554	9.2195	30.4138	0.3004
217	9.2195	10.198	29.4279	0.3299
218	10.0499	9.0554	30.4138	0.3141
219	9.2195	10.198	29.4279	0.3299
220	10.0499	10.198	30.2655	0.3345
221	10.198	10.198	29.4279	0.3465
222	10.0499	10.0499	31.4006	0.3201
223	10.0499	11.0454	30.2655	0.3485
224	10.0499	10.0499	30.2655	0.3321
225	9.2195	11.0454	29.2746	0.3461
226	10.0499	10.198	29.2746	0.3458
227	10.0499	11.1803	29.2746	0.3626
228	10.0499	10.0499	30.2655	0.3321
229	10.0499	10.198	29.1548	0.3472
230	10.0499	11.0454	30.1496	0.3498
231	10.198	11.0454	29.1548	0.3643
232	10	11.0454	30.2655	0.3477
233	10.0499	10.0499	28.1603	0.3569
234	10.0499	10.0499	30.1496	0.3333
235	10.0499	11.0454	29.2746	0.3603
236	11.0454	10.0499	30.2655	0.3485
237	10.0499	10.0499	29.1548	0.3447
238	10.0499	10.0499	30.2655	0.3321
239	10.198	10.198	29.2746	0.3484
240	10.0499	10.0499	30.2655	0.3321
241	10.0499	10.0499	29.4279	0.3415
242	10.0499	10.0499	30.2655	0.3321
243	9.0554	10.0499	29.2746	0.3263
244	10.0499	10.0499	30.2655	0.3321
245	9.2195	9.2195	29.2746	0.3149
246	9.0554	10.198	30.2655	0.3181
247	9.0554	10.198	29.2746	0.3288
248	10.0499	10.198	30.2655	0.3345
249	9.2195	10.198	30.2655	0.3208
250	10.0499	9.0554	30.2655	0.3156
251	9.0554	10.0499	29.2746	0.3263
252	9.0554	9.0554	29.1548	0.3106
253	9.0554	9.0554	30.2655	0.2992
254	10.0499	9.0554	30.2655	0.3156
255	9.2195	10.198	30.2655	0.3208
256	10	9.0554	29.1548	0.3268
257	9.0554	10.198	29.2746	0.3288
258	10.0499	9.0554	30.1496	0.3168
259	9.2195	10.198	29.2746	0.3316
260	10	10.0499	30.2655	0.3312
261	9.0554	10.0499	29.2746	0.3263
262	9	9.0554	29.2746	0.3084
263	9.0554	10.0499	29.2746	0.3263
264	10.0499	10.0499	29.2746	0.3433
265	9.2195	10.198	30.2655	0.3208
266	10.0499	9.0554	30.2655	0.3156
267	9.2195	11.1803	30.2655	0.337
268	10.0499	9	30.1496	0.3159
269	8.2462	9.0554	29.2746	0.2955
270	9.0554	10.0499	29.2746	0.3263
271	6.0828	6.0828	28.1603	0.216
272	5.099	6.0828	28.4429	0.1966
273	3.1623	4.1231	29.1548	0.1249
274	4.1231	4.4721	29.4279	0.146
275	3.1623	4.1231	29.1548	0.1249
276	3.6056	4.1231	29.4279	0.1313
277	6.0828	7.2801	29.2746	0.2282
278	6.3246	6.0828	29.2746	0.2119
279	8.0623	8.0623	29.2746	0.2754
280	8.0623	7.0711	29.2746	0.2585
281	8.0623	8.2462	29.4279	0.2771
282	8.0623	8.0623	29.2746	0.2754
283	9.2195	9.0554	29.4279	0.3105
284	8.0623	9.0554	29.2746	0.2924
285	8.2462	10.198	28.8617	0.3195
286	10.198	9.2195	30.5941	0.3173
287	9.2195	10.198	29.8329	0.3254
288	10.0499	10.198	29.4279	0.344
289	10.198	11.4018	29.8329	0.362
290	10.0499	10.0499	30.4138	0.3304
291	10.198	10.198	29.8329	0.3418
292	11.0454	11.1803	30.2655	0.3672
293	10.198	10.4403	29.8329	0.3459
294	10.0499	10.198	30.4138	0.3329
295	11.1803	11.1803	29.8329	0.3748
296	11.0454	11.0454	29.2746	0.3773
297	10.198	11.1803	29.8329	0.3583
298	11.0454	10.0499	30.2655	0.3485
299	10.198	10.198	29.8329	0.3418
300	11.0454	10.0499	30.2655	0.3485
301	10.198	11.1803	29.8329	0.3583
302	11.0454	11.1803	29.2746	0.3796
303	10.4403	11.4018	29.8329	0.3661
304	11.0454	11.0454	30.2655	0.3649
305	11.1803	11.4018	30.8058	0.3665
306	11.0454	11.1803	29.1548	0.3812
307	10.198	10.198	30.8058	0.331
308	11.1803	11.1803	29.2746	0.3819
309	10.198	10.198	29.8329	0.3418
310	11.0454	11.0454	29.2746	0.3773
311	10.198	11.1803	29.8329	0.3583
312	12.1655	11.1803	29.2746	0.3987
313	10.4403	10.198	29.8329	0.3459
314	11.1803	11.1803	29.2746	0.3819
315	10.198	11.1803	29.8329	0.3583
316	11.0454	10.198	30.1496	0.3523
317	11.1803	11.1803	29.8329	0.3748
318	11.1803	11.1803	29.2746	0.3819
319	10.198	10.4403	31.0483	0.3324
320	11.0454	11.0454	30.2655	0.3649
321	10.4403	11.4018	29.8329	0.3661
322	11.0454	11.1803	29.2746	0.3796
323	11.4018	12.1655	29.8329	0.395
324	12.0416	11.0454	30.2655	0.3814
325	10.198	11.1803	30.0832	0.3553
326	11.0454	11.0454	30.2655	0.3649
327	10.198	11.1803	29.8329	0.3583
328	11.1803	11.1803	29.2746	0.3819
329	10.4403	11.4018	29.8329	0.3661
330	11.0454	11.0454	30.2655	0.3649
331	10.198	11.1803	30.8058	0.347
332	12.0416	11.1803	30.2655	0.3836
333	10.4403	10.198	29.8329	0.3459
334	11.0454	11.1803	29.2746	0.3796
335	10.4403	10.4403	29.8329	0.35
336	11.0454	11.1803	29.2746	0.3796
337	10.4403	11.1803	29.6142	0.365
338	11.1803	11.1803	29.1548	0.3835
339	10.198	11.1803	29.8329	0.3583
340	10.0499	10.198	30.2655	0.3345
341	10.198	11.4018	30.8058	0.3506
342	11.0454	11.1803	30.1496	0.3686
343	9.0554	11.1803	29.6142	0.3417
344	11.0454	11.0454	29.2746	0.3773
345	10.198	11.1803	30.5941	0.3494
346	11.0454	11.0454	30.2655	0.3649
347	10.0499	11.0454	29.6142	0.3562
348	10.0499	11.0454	29.2746	0.3603
349	11.0454	11.1803	29.6142	0.3753
350	11.0454	10.0499	30.2655	0.3485
351	10.198	10.198	28.6356	0.3561
352	10.0499	10.0499	29.2746	0.3433
353	10.0499	11.1803	28.4429	0.3732
354	11.0454	10.0499	29.2746	0.3603
355	10.0499	11.0454	29.4279	0.3584
356	10.0499	10.0499	30.2655	0.3321
357	10.198	11.1803	28.6356	0.3733
358	10.0499	10.0499	30.2655	0.3321
359	10.198	11.1803	28.6356	0.3733
360	11.0454	11.0454	29.2746	0.3773
361	10.198	11.1803	28.4429	0.3758
362	11.0454	11.0454	30.2655	0.3649
363	10.198	11.1803	28.6356	0.3733
364	11.0454	11.0454	30.1496	0.3664
365	10.198	11.0454	29.4279	0.3609
366	11.0454	11.1803	29.2746	0.3796
367	10.0499	11.0454	29.6142	0.3562
368	11.0454	11.0454	30.2655	0.3649
369	10.198	11.1803	28.6356	0.3733
370	11.0454	11.0454	30.2655	0.3649
371	10.198	11.1803	28.4429	0.3758
372	10.0499	10.0499	29.2746	0.3433
373	10.198	11.1803	28.4429	0.3758
374	10.0499	11.0454	30.4138	0.3468
375	10.198	11.1803	28.4429	0.3758
376	10.0499	11.0454	30.1496	0.3498
377	10.198	11.1803	29.6142	0.3609
378	10.0499	11.0454	30.2655	0.3485
379	9.2195	10.198	28.6356	0.339
380	11.0454	11.0454	30.4138	0.3632
381	10.198	10.198	28.6356	0.3561
382	11	11.0454	29.1548	0.3781
383	10.198	11.1803	28.4429	0.3758
384	10.0499	11.0454	30.2655	0.3485
385	10.198	11.1803	29.4279	0.3632
386	10.0499	10.0499	30.2655	0.3321
387	9.2195	10.0499	28.4429	0.3387
388	10.0499	10.0499	29.2746	0.3433
389	10.198	11.1803	28.4429	0.3758
390	10.0499	10.0499	30.2655	0.3321
391	9.2195	10.198	29.4279	0.3299
392	10.0499	10.0499	30.2655	0.3321
393	10.198	11.1803	28.4429	0.3758
394	10.0499	11.0454	29.1548	0.3618
395	10.198	11.1803	29.4279	0.3632
396	10.0499	10.0499	30.2655	0.3321
397	10.0499	11.0454	29.4279	0.3584
398	10.0499	10.0499	30.1496	0.3333
399	10.198	11.1803	29.4279	0.3632
400	10.0499	10.0499	30.2655	0.3321
401	10.0499	11.0454	28.4429	0.3708
402	10.0499	10.0499	29.2746	0.3433
403	10.198	11.1803	29.4279	0.3632
404	10.0499	10.0499	30.2655	0.3321
405	10.198	11.1803	29.4279	0.3632
406	11.0454	10.0499	30.2655	0.3485
407	10.198	11.1803	29.4279	0.3632
408	10.0499	10.0499	30.1496	0.3333
409	10.0499	10.198	29.4279	0.344
410	10.0499	9.0554	30.1496	0.3168
411	10.0499	10.198	29.4279	0.344
412	10.0499	9.2195	29.2746	0.3291
413	9.0554	10.198	28.2843	0.3404
414	10.0499	9.0554	29.2746	0.3263
415	9.0554	10.198	29.2746	0.3288
416	10.0499	9.0554	30.2655	0.3156
417	9.0554	10.198	29.2746	0.3288
418	10.0499	10.0499	30.2655	0.3321
419	10.198	10.0499	29.4279	0.344
420	10.0499	10.0499	30.2655	0.3321
421	10.0499	11.1803	28.4429	0.3732
422	10.0499	10.0499	29.2746	0.3433
423	10.0499	11.1803	28.6356	0.3707
424	10	10.0499	30.1496	0.3325
425	10.198	11.1803	29.6142	0.3609
426	10.0499	10.0499	30.1496	0.3333
427	10.0499	11.1803	28.4429	0.3732
428	10.0499	11.0454	30.1496	0.3498
429	9.0554	10.198	28.4429	0.3385
430	10	10.0499	30.2655	0.3312
431	9.2195	10.198	29.4279	0.3299
432	10	9.0554	29.1548	0.3268
433	10.0499	11.1803	28.4429	0.3732
434	10	10.0499	30.1496	0.3325
435	9.0554	10.198	28.4429	0.3385
436	9	9.0554	30.1496	0.2994
437	10.0499	10.0499	29.4279	0.3415
438	9	9.0554	30.1496	0.2994
439	10.198	11.1803	29.4279	0.3632
440	9.0554	10.0499	30.2655	0.3156
441	9.2195	10.0499	29.4279	0.3274
442	9.0554	10.0499	30.2655	0.3156
443	10.198	11.0454	29.4279	0.3609
444	9.0554	10.0499	29.1548	0.3277
445	10.198	10.0499	29.4279	0.344
446	10.0499	10.0499	30.2655	0.3321
447	9.2195	10.198	29.4279	0.3299
448	10.0499	9.0554	29.1548	0.3277
449	9.2195	10.198	29.4279	0.3299
450	10.0499	9	29.1548	0.3267
451	10.0499	11.1803	29.4279	0.3607
452	10.0499	10.0499	30.2655	0.3321
453	9.0554	10.198	29.4279	0.3271
454	10.0499	10.0499	30.2655	0.3321
455	10.0499	11.0454	29.4279	0.3584
456	10.0499	10.0499	30.1496	0.3333
457	10.0499	10.198	29.4279	0.344
458	10.0499	10.0499	30.2655	0.3321
459	9.2195	10.0499	29.4279	0.3274
460	10.0499	9.0554	30.1496	0.3168
461	9.2195	10.0499	29.4279	0.3274
462	10.0499	9.0554	30.1496	0.3168
463	10.198	11.0454	29.4279	0.3609
464	11.0454	10.0499	30.2655	0.3485
465	9.2195	10.0499	29.4279	0.3274
466	10.0499	9.0554	30.1496	0.3168
467	8.2462	8.2462	28.4429	0.2899
468	8.0623	8.0623	30.2655	0.2664
469	8.2462	9.2195	28.2843	0.3088
470	8.0623	8.0623	30.2655	0.2664
471	9.2195	9.0554	29.4279	0.3105
472	9.0554	9.0554	29.2746	0.3093
473	9.0554	10.198	29.2746	0.3288
474	9.0554	9.0554	30.1496	0.3003
475	9.0554	11.1803	28.4429	0.3557
476	9	9.0554	30.1496	0.2994
477	9.2195	10.0499	29.4279	0.3274
478	10.0499	9.0554	30.2655	0.3156
479	9.2195	10.198	29.4279	0.3299
480	10.0499	9.0554	30.2655	0.3156
481	9.0554	11.0454	29.2746	0.3433
482	9.0554	10.198	30.1496	0.3193
483	10.198	11.0454	29.4279	0.3609
484	9.0554	10.0499	29.2746	0.3263
485	10.0499	10.0499	28.4429	0.3533
486	10	10.0499	29.1548	0.3439
487	9.0554	10.198	29.4279	0.3271
488	10.0499	9.0554	30.1496	0.3168
489	10.198	11.1803	28.4429	0.3758
490	10.0499	10.0499	30.1496	0.3333
491	10.0499	11.1803	28.4429	0.3732
492	10	10.0499	30.2655	0.3312
493	10.0499	10.198	29.4279	0.344
494	10.0499	10.0499	29.2746	0.3433
495	9.2195	10.198	29.4279	0.3299
496	10.0499	9.0554	30.1496	0.3168
497	9.2195	10.198	29.4279	0.3299
498	10.0499	10.0499	30.1496	0.3333
499	10.198	10.198	29.4279	0.3465
500	10.0499	10.0499	30.1496	0.3333
501	9.2195	10.198	28.4429	0.3413
502	10.0499	9.0554	30.1496	0.3168
503	10.198	10.0499	29.4279	0.344
504	9.0554	10.0499	30.1496	0.3168
505	10.198	10.0499	29.4279	0.344
506	10.0499	10.0499	30.2655	0.3321
507	10.198	10.198	29.4279	0.3465
508	10.0499	9.0554	30.2655	0.3156
509	10.198	10.198	29.4279	0.3465
510	10.0499	9.0554	30.2655	0.3156
511	9.2195	10.198	29.4279	0.3299
512	10.0499	9.0554	30.1496	0.3168
513	9.2195	10.198	28.4429	0.3413
514	10.0499	9.0554	30.1496	0.3168
515	10.198	10.198	29.4279	0.3465
516	9.0554	9.0554	30.1496	0.3003
517	9.2195	10.0499	29.4279	0.3274
518	10.0499	9.0554	30.2655	0.3156
519	9.2195	10.198	29.4279	0.3299
520	10.0499	9.0554	30.2655	0.3156
521	10.198	10.198	28.4429	0.3585
522	10.0499	9.0554	29.2746	0.3263
523	9.0554	10.198	28.6356	0.3362
524	10	9.0554	30.1496	0.316
525	10.198	11.0454	29.4279	0.3609
526	9.0554	10.198	30.1496	0.3193
527	10.0499	10.198	28.6356	0.3535
528	11.0454	10.0499	30.1496	0.3498
529	10.198	11.1803	29.4279	0.3632
530	10.0499	10.0499	30.1496	0.3333
531	10.198	11.1803	29.4279	0.3632
532	10.0499	10.0499	30.1496	0.3333
533	10.0499	11.1803	28.4429	0.3732
534	10.0499	10.0499	30.1496	0.3333
535	10.198	11.0454	28.4429	0.3734
536	10	10	30.1496	0.3317
537	10.198	10.198	29.4279	0.3465
538	10.0499	10.0499	31.1448	0.3227
539	9.2195	10.0499	29.4279	0.3274
540	9	9.0554	30.1496	0.2994
541	9.0554	10.198	29.4279	0.3271
542	9.0554	10.0499	30.1496	0.3168
543	10.198	10.198	29.4279	0.3465
544	10	9.0554	30.1496	0.316
545	9.0554	9.2195	28.4429	0.3213
546	9.0554	9.0554	30.1496	0.3003
547	9.0554	10.198	28.4429	0.3385
548	10.0499	9.0554	30.1496	0.3168
549	9.2195	9.2195	28.4429	0.3241
550	10.0499	9.0554	31.1448	0.3067
551	9.0554	9.2195	28.4429	0.3213
552	9.0554	9.0554	30.1496	0.3003
553	9.2195	10.198	28.4429	0.3413
554	9.0554	9.0554	31.1448	0.2908
555	10.198	10.0499	29.4279	0.344
556	10.0499	9.0554	31.257	0.3056
557	9.2195	10.198	28.2843	0.3433
558	9.0554	9.2195	30.1496	0.3031
559	10.198	9.0554	29.4279	0.3271
560	10.0499	9.0554	30.2655	0.3156
561	9.2195	10.198	29.4279	0.3299
562	10.0499	10.0499	31.257	0.3215
563	9.2195	10.198	28.2843	0.3433
564	9.0554	9.0554	31.257	0.2897
565	9.2195	9.0554	28.2843	0.3231
566	9.0554	9.2195	30.2655	0.3019
567	10.198	9.0554	27.4591	0.3506
568	9.0554	9.0554	30.2655	0.2992
569	9.2195	10.198	29.2746	0.3316
570	9.0554	9.2195	31.4006	0.291
571	9.2195	10.198	28.2843	0.3433
572	9.0554	10.0499	30.2655	0.3156
573	9.2195	10.198	28.4429	0.3413
574	9.0554	9.0554	30.2655	0.2992
575	9.0554	9.2195	29.2746	0.3121
576	10.0499	9.0554	30.2655	0.3156
577	9.2195	10.198	28.2843	0.3433
578	10.0499	9.0554	30.2655	0.3156
579	10.198	9.2195	29.4279	0.3299
580	10.0499	9.2195	30.2655	0.3183
581	9.2195	10.0499	28.4429	0.3387
582	10.0499	9.0554	30.2655	0.3156
583	10.198	10.0499	28.2843	0.3579
584	10.0499	9.0554	29.2746	0.3263
585	9.2195	10.198	28.2843	0.3433
586	10.0499	9.0554	30.1496	0.3168
587	10.198	9.2195	28.4429	0.3413
588	9.0554	8.0623	30.2655	0.2828
589	9.2195	10.198	28.4429	0.3413
590	10.0499	9.0554	30.2655	0.3156
591	9.0554	9.0554	27.4591	0.3298
592	9.0554	9.0554	30.2655	0.2992
593	9.0554	9.2195	28.4429	0.3213
594	9.0554	8.0623	30.1496	0.2839
595	10.198	10.0499	29.4279	0.344
596	10.0499	9.0554	31.257	0.3056
597	9.2195	9.2195	28.4429	0.3241
598	10.0499	9.0554	30.2655	0.3156
599	9.0554	9.2195	28.4429	0.3213
600	9.0554	9.0554	30.1496	0.3003
601	9.2195	10.0499	28.6356	0.3365
602	10.0499	10.0499	30.1496	0.3333
603	10.198	9.2195	28.4429	0.3413
604	9.0554	9.0554	31.257	0.2897
605	10.198	9.0554	29.4279	0.3271
606	10.0499	9.0554	30.1496	0.3168
607	9.2195	10.198	29.4279	0.3299
608	10.0499	10.0499	31.1448	0.3227
609	10.198	10.0499	29.4279	0.344
610	10.0499	9.0554	30.1496	0.3168
611	10.0499	10.198	29.4279	0.344
612	9.0554	9	30.1496	0.2994
613	9.2195	10.198	28.6356	0.339
614	10.0499	9.0554	30.1496	0.3168
615	10.198	9.0554	27.4591	0.3506
616	9.0554	9	30.1496	0.2994
617	10.198	9.0554	29.4279	0.3271
618	9.0554	9.0554	30.1496	0.3003
619	9.2195	10.0499	28.4429	0.3387
620	9.0554	9.0554	30.1496	0.3003
621	10.198	9.2195	28.4429	0.3413
622	9.0554	9.0554	30.1496	0.3003
623	9.2195	10.198	28.4429	0.3413
624	9.0554	9.0554	30.1496	0.3003
625	9.2195	10.0499	28.4429	0.3387
626	9.0554	9.0554	30.1496	0.3003
627	9.2195	10.198	28.4429	0.3413
628	9.0554	9.0554	30.1496	0.3003
629	10.0499	10.198	29.4279	0.344
630	10.0499	10.0499	31.1448	0.3227
631	10.198	10.0499	29.4279	0.344
632	10	9.0554	31.0644	0.3067
633	9.2195	10.0499	29.2746	0.3291
634	10.0499	9.0554	31.1448	0.3067
635	9.0554	10.198	29.2746	0.3288
636	10.0499	9.0554	31.1448	0.3067
637	10.0499	10.198	28.4429	0.3559
638	10.0499	9.0554	30.1496	0.3168
639	10.198	11.0454	29.4279	0.3609
640	10.0499	10.0499	31.1448	0.3227
641	10.198	10.0499	29.4279	0.344
642	10.0499	10.0499	31.1448	0.3227
643	10.0499	10.198	29.4279	0.344
644	10	10.0499	30.1496	0.3325
645	10.198	10.0499	29.2746	0.3458
646	10.0499	9.0554	30.1496	0.3168
647	10.0499	10.198	29.2746	0.3458
648	10.0499	10.0499	30.1496	0.3333
649	10.198	10.0499	29.2746	0.3458
650	10.0499	9.0554	30.1496	0.3168
651	9.0554	10.0499	29.2746	0.3263
652	10.0499	9.0554	30.1496	0.3168
653	10.198	10.0499	28.2843	0.3579
654	9.0554	10.0499	30.1496	0.3168
655	10.0499	10.198	29.2746	0.3458
656	10	9	31.1448	0.305
657	9.0554	10.198	28.2843	0.3404
658	10.0499	9	31.1448	0.3058
659	9.2195	10.0499	28.2843	0.3406
660	10.0499	9.0554	31.1448	0.3067
661	9.0554	10.0499	28.1603	0.3392
662	9.0554	10.0499	30.1496	0.3168
663	9.0554	10.0499	28.0179	0.3409
664	9.0554	9	30.0167	0.3008
665	9.0554	9.0554	26.0192	0.348
666	9	9	31.0161	0.2902
667	10.0499	10	27	0.3713
668	10	9	31	0.3065
669	9	10	26	0.3654
670	8	8	29	0.2759
671	9	9.0554	26.0192	0.347
672	9	9	30	0.3
673	9	10	26.0768	0.3643
674	9	9	29	0.3103
675	9	10	26.0192	0.3651
676	9.0554	9	30	0.3009
677	10	10	27.0185	0.3701
678	9	9	30	0.3
679	10	10.0499	28.0179	0.3578
680	10	9	29.0172	0.3274
681	10	11	27	0.3889
682	10.0499	10	30	0.3342
683	10	10	27	0.3704
684	10	9	29	0.3276
685	11.0454	10.0499	27	0.3907
686	10	9	29	0.3276
687	10	10	28.0179	0.3569
688	9	10	30	0.3167
689	10	10	27	0.3704
690	10	10	30.0167	0.3331
691	10	11.0454	28.0179	0.3756
692	10.0499	10	29.0172	0.3455
693	9	11.0454	28.0179	0.3577
694	10.0499	9	29.0172	0.3283
695	10	11.0454	28	0.3758
696	10	10	30	0.3333
697	10	10.0499	28.0179	0.3578
698	10	10	30	0.3333
699	10	10	29.0172	0.3446
700	10	10	31	0.3226
701	10	10.0499	28.0179	0.3578
702	10.0499	9	30.0167	0.3173
703	10.0499	10.0499	28.0713	0.358
704	11	10	30.0167	0.3498
705	10.0499	11	28.0179	0.3757
706	10	10	30.0666	0.3326
707	10.0499	10.0499	28.0713	0.358
708	10	10	29.0689	0.344
709	9	10.0499	28.0713	0.3393
710	10	10	30.0666	0.3326
711	9.0554	10.0499	28.1603	0.3392
712	10	10	30.0167	0.3331
713	10	11.0454	28.0713	0.3749
714	10	10	29.0689	0.344
715	9.0554	10.0499	28.0713	0.3403
716	10.0499	9	30.0167	0.3173
717	9.0554	10	28.0713	0.3394
718	10	10	30.0666	0.3326
719	10.0499	11	29.0689	0.3621
720	10	10	30.0666	0.3326
721	11.0454	10.0499	28.0713	0.3757
722	11	10	30.0666	0.3492
723	10.0499	10.0499	29.0689	0.3457
724	10.0499	10.0499	29.0689	0.3457
725	10.0499	11.0454	28.1603	0.3746
726	10	10	30.0666	0.3326
727	10	10.0499	28.1603	0.356
728	10.0499	10.0499	30.0666	0.3343
729	10.0499	11.0454	29.1548	0.3618
730	10	10	30.0666	0.3326
731	10.0499	10.0499	29.0689	0.3457
732	10.0499	10.0499	30.0666	0.3343
733	10.0499	11.0454	28.0713	0.3757
734	11	11.0454	31.0644	0.3548
735	10.0499	10.0499	28.0713	0.358
736	10	10	30.0666	0.3326
737	11.0454	10.0499	29.0689	0.3628
738	10.0499	10.0499	30.0666	0.3343
739	10.0499	10.0499	29.0689	0.3457
740	10	10.0499	30.0666	0.3334
741	11.0454	11.0454	28.0713	0.3935
742	10.0499	10.0499	30.0666	0.3343
743	10.0499	10.0499	28.0713	0.358
744	11	10	30.0666	0.3492
745	10.0499	10.0499	28.1603	0.3569
746	10.0499	10	30.1496	0.3325
747	9	10.0499	29.0689	0.3277
748	9	9.0554	30.0666	0.3003
749	9	10.0499	28.1603	0.3382
750	9	9.0554	30.0666	0.3003
751	10.0499	10.0499	28.1603	0.3569
752	10.0499	10	29.1548	0.3439
753	10.0499	10	28.1603	0.356
754	10.0499	9	29.1548	0.3267
755	10.0499	10.0499	29.1548	0.3447
756	10	9.0554	30.1496	0.316
757	10.0499	10.0499	29.1548	0.3447
758	10	9.0554	30.1496	0.316
759	10.0499	10.0499	28.0713	0.358
760	10.0499	10.0499	30.1496	0.3333
761	10	11.0454	29.0689	0.362
762	10.0499	10.0499	31.1448	0.3227
763	10.0499	11.0454	28.1603	0.3746
764	10	9.0554	30.1496	0.316
765	10.0499	11.0454	28.1603	0.3746
766	10.0499	10.0499	30.1496	0.3333
767	10.0499	11.0454	28.1603	0.3746
768	10.0499	9.0554	30.1496	0.3168
769	10.0499	10.0499	28.1603	0.3569
770	9.0554	9	29.1548	0.3096
771	10.0499	10.0499	28.1603	0.3569
772	10.0499	9.0554	29.1548	0.3277
773	10.0499	10.0499	28.0713	0.358
774	10.0499	9.0554	29.1548	0.3277
775	10.0499	11.0454	29.1548	0.3618
776	10.0499	10.0499	30.1496	0.3333
777	10.0499	11.0454	29.1548	0.3618
778	10.0499	9.0554	30.0666	0.3177
779	10.0499	11.0454	28.1603	0.3746
780	11	10	30.1496	0.3483
781	10.0499	11.0454	28.1603	0.3746
782	11	10	30.1496	0.3483
783	10.0499	11.0454	28.1603	0.3746
784	11.0454	10.0499	31.0644	0.3395
785	10.0499	11.0454	28.1603	0.3746
786	11.0454	10.0499	30.0666	0.3508
787	11.0454	10.0499	28.0713	0.3757
788	11.0454	10.0499	30.0666	0.3508
789	10.0499	10.0499	28.0713	0.358
790	10.0499	9.0554	31.0644	0.3075
791	11.0454	10.0499	28.1603	0.3746
792	10	10.0499	31.0644	0.3227
793	10.0499	11.0454	28.1603	0.3746
794	10.0499	10.0499	31.0644	0.3235
795	10.0499	11.0454	29.1548	0.3618
796	11	10.0499	31.1448	0.3379
797	10.0499	11.0454	28.1603	0.3746
798	11	11.0454	31.1448	0.3539
799	10.0499	11.0454	28.1603	0.3746
800	11.0454	11.0454	31.0644	0.3556
801	11.0454	11.0454	29.1548	0.3789
802	11	11.0454	31.0644	0.3548
803	11.0454	11.0454	29.1548	0.3789
804	11.0454	11.0454	31.0644	0.3556
805	10.0499	10.0499	29.1548	0.3447
806	10.0499	10.0499	31.0644	0.3235
807	10	10.0499	29.1548	0.3439
808	10.0499	10.0499	30.0666	0.3343
809	10.0499	10.0499	28.1603	0.3569
810	10.0499	10.0499	30.1496	0.3333
811	10	11.0454	29.1548	0.3609
812	11.0454	10.0499	30.0666	0.3508
813	10	11.0454	29.0689	0.362
814	10.0499	10.0499	30.0666	0.3343
815	11.0454	10.0499	28.1603	0.3746
816	10	10.0499	30.0666	0.3334
817	6	6	27.0185	0.2221
818	6	6.0828	29.1548	0.2072
819	6	6	27.0185	0.2221
820	6.0828	6.0828	29.1548	0.2086
821	8	8	28.0713	0.285
822	8.0623	8.0623	30.1496	0.2674
823	10.0499	10.0499	28.0713	0.358
824	10.0499	10	30.1496	0.332
825	10.0499	10.0499	28.1603	0.3569
826	10	10	31.0644	0.3219
827	10.0499	11	29.1548	0.361
828	10	10	30.0666	0.3326
829	10.0499	10.0499	29.0689	0.3457
830	10	10.0499	30.0666	0.3334
831	11.0454	11.0454	29.1548	0.3789
832	11	10	30.0666	0.3492
833	10.0499	11.0454	29.1548	0.3618
834	10.0499	10.0499	31.0644	0.3235
835	10.0499	11.0454	29.1548	0.3618
836	10	10	30.0666	0.3326
837	11.0454	11.0454	28.1603	0.3922
838	10	11	30.0666	0.3492
839	10.0499	10.0499	29.1548	0.3447
840	10	10	30.0666	0.3326
841	10.0499	11.0454	29.1548	0.3618
842	11.0454	10.0499	31.0644	0.3395
843	10.0499	11.0454	28.1603	0.3746
844	10.0499	10.0499	30.0666	0.3343
845	11.0454	11.0454	28.1603	0.3922
846	11.0454	10.0499	31.0644	0.3395
847	11.0454	10.0499	28.1603	0.3746
848	10.0499	10.0499	30.1496	0.3333
849	11.0454	10.0499	29.1548	0.3618
850	10.0499	10.0499	30.1496	0.3333
851	11.0454	10.0499	29.1548	0.3618
852	10.0499	10.0499	30.0666	0.3343
853	10.0499	11.0454	29.0689	0.3628
854	10	10.0499	30.1496	0.3325
855	10.0499	11.0454	29.0689	0.3628
856	10	10	30.1496	0.3317
857	10.0499	11.0454	29.1548	0.3618
858	10	10.0499	31.0644	0.3227
859	10.0499	11.0454	28.1603	0.3746
860	10	10	31.0644	0.3219
861	11.0454	10.0499	29.1548	0.3618
862	10	10.0499	31.0644	0.3227
863	10.0499	11.0454	29.1548	0.3618
864	10	10	30.0666	0.3326
865	10.0499	11.0454	29.1548	0.3618
866	10	10	30.0666	0.3326
867	10.0499	11.0454	29.0689	0.3628
868	10	10.0499	31.0644	0.3227
869	10.0499	11.0454	28.0713	0.3757
870	10.0499	10.0499	30.0666	0.3343
871	10.0499	11.0454	28.0713	0.3757
872	11.0454	10.0499	31.0644	0.3395
873	10.0499	11.0454	28.0713	0.3757
874	10.0499	10.0499	31.1448	0.3227
875	11.0454	10.0499	28.0713	0.3757
876	10	9.0554	30.1496	0.316
877	11.0454	10.0499	28.0713	0.3757
878	10.0499	10.0499	30.1496	0.3333
879	11.0454	11.0454	28.1603	0.3922
880	11	11.0454	31.0644	0.3548
881	10.0499	11.0454	29.1548	0.3618
882	10.0499	10.0499	31.0644	0.3235
883	11.0454	10.0499	29.0689	0.3628
884	11	10.0499	31.0644	0.3388
885	11.0454	10.0499	28.0713	0.3757
886	10.0499	10.0499	31.1448	0.3227
887	10.0499	11.0454	29.1548	0.3618
888	10	10	30.0666	0.3326
889	10.0499	11.0454	27.1662	0.3883
890	10.0499	10.0499	30.0666	0.3343
891	10.0499	11.0454	28.1603	0.3746
892	10.0499	10.0499	30.0666	0.3343
893	11.0454	11.0454	28.0713	0.3935
894	10.0499	10	30.0666	0.3334
895	10.0499	11.0454	28.1603	0.3746
896	11.0454	10	30.0666	0.35
897	10.0499	11.0454	28.0713	0.3757
898	10.0499	10	30.0666	0.3334
899	10.0499	11.0454	28.0713	0.3757
900	10.0499	10.0499	30.1496	0.3333
901	10.0499	11.0454	28.1603	0.3746
902	10.0499	10.0499	30.0666	0.3343
903	10.0499	11.0454	29.1548	0.3618
904	10.0499	10	30.0666	0.3334
905	10.0499	11.0454	29.0689	0.3628
906	10.0499	10	30.1496	0.3325
907	10.0499	11.0454	28.1603	0.3746
908	10	10	30.0666	0.3326
909	10.0499	10.0499	29.0689	0.3457
910	10	9	30.0666	0.316
911	10.0499	11.0454	29.1548	0.3618
912	11	10	30.0167	0.3498
913	10.0499	11.0454	29.1548	0.3618
914	10	10	30.0666	0.3326
915	10.0499	11.0454	28.1603	0.3746
916	11.0454	11	30.0666	0.3666
917	10.0499	10.0499	29.1548	0.3447
918	10.0499	10.0499	31.0644	0.3235
919	10.0499	11.0454	29.1548	0.3618
920	11.0454	10.0499	31.0161	0.3401
921	11.0454	11.0454	29.1548	0.3789
922	10	10.0499	31.0644	0.3227
923	10.0499	11.1803	29.1548	0.3641
924	10	10	31.0644	0.3219
925	11.0454	11.0454	29.1548	0.3789
926	10	10	31.0644	0.3219
927	11.0454	11.0454	29.1548	0.3789
928	11	10.0499	31.0644	0.3388
929	10.0499	10.0499	29.0689	0.3457
930	10	10	30.1496	0.3317
931	11.0454	11.0454	29.1548	0.3789
932	11	11.0454	31.0161	0.3554
933	11.0454	10.0499	28.1603	0.3746
934	11	11	30.0666	0.3659
935	10.0499	11.0454	28.0713	0.3757
936	11	10.0499	31.0644	0.3388
937	10.0499	10.0499	28.0713	0.358
938	11.0454	9.0554	31.0644	0.3235
939	10.0499	11.0454	28.0713	0.3757
940	11	10.0499	30.0666	0.3501
941	11.0454	10.0499	28.0713	0.3757
942	11	10.0499	31.0644	0.3388
943	11.0454	10.0499	28.1603	0.3746
944	11.0454	10.0499	31.0644	0.3395
945	11.0454	11.0454	28.0713	0.3935
946	11.0454	10.0499	31.0644	0.3395
947	10.0499	11.0454	28.0713	0.3757
948	11.0454	11.0454	30.0666	0.3674
949	10.0499	10.0499	28.0713	0.358
950	10	10	30.0666	0.3326
951	11.0454	11.0454	29.0689	0.38
952	11.0454	10.0499	30.0666	0.3508
953	10.0499	11.0454	28.0713	0.3757
954	11.0454	11.0454	31.0644	0.3556
955	10.0499	11.0454	28.0713	0.3757
956	10	10	30.0666	0.3326
957	10	10.0499	28.1603	0.356
958	10.0499	10.0499	31.0161	0.324
959	9.0554	10	29.0689	0.3278
960	10	10	31.0644	0.3219
961	10	10.0499	29.0689	0.3449
962	10	10	31.0644	0.3219
963	9	10.0499	28.0713	0.3393
964	10.0499	10.0499	30.0666	0.3343
965	9	10	28.0713	0.3384
966	9.0554	9	31.0644	0.2906
967	9.0554	10.0499	28.0713	0.3403
968	10.0499	10.0499	30.0666	0.3343
969	9	10.0499	29.0689	0.3277
970	9	9	31.0644	0.2897
971	9	10.0499	29.0689	0.3277
972	9.0554	9.0554	30.0666	0.3012
973	9.0554	10.0499	28.0713	0.3403
974	9.0554	9.0554	30.0666	0.3012
975	9.0554	10.0499	28.0713	0.3403
976	10	10.0499	30.0666	0.3334
977	9.0554	10.0499	29.0689	0.3286
978	9	9	31.0161	0.2902
979	9	10.0499	28.0713	0.3393
980	8	10	30.0666	0.2993
981	9.0554	10	27.074	0.3519
982	9	9	30.0666	0.2993
983	9.0554	10.0499	27.074	0.3528
984	9	9	29.0689	0.3096
985	9.0554	10	27.074	0.3519
986	9	9	30.0666	0.2993
987	9	10.0499	28.0713	0.3393
988	9	9	30.0167	0.2998
989	8.0623	9	27.0185	0.3158
990	8	8	30.0167	0.2665
991	9.0554	10.0499	27.0185	0.3536
992	9	9.0554	30.0666	0.3003
993	9	10.0499	27.074	0.3518
994	10.0499	10	30.0167	0.334
995	10	11	28.0713	0.374
996	10	10.0499	30.0167	0.334
997	10.0499	10	28.0713	0.3571
998	10.0499	10	30.0167	0.334
999	10	11.0454	28.0713	0.3749
1000	10	10	30.0167	0.3331
1001	10	10	28.0713	0.3562
1002	10	10	30.0167	0.3331
1003	10	11.0454	28.0179	0.3756
1004	10	10	31.0644	0.3219
1005	10	10.0499	28.0713	0.3571
1006	10	11	31.0161	0.3385
1007	10.0499	10	28.0713	0.3571
1008	10	10	31.0161	0.3224
1009	10.0499	11.0454	28.0713	0.3757
1010	10.0499	10	31.0644	0.3227
1011	10.0499	11.0454	28.0713	0.3757
1012	10	10	30.0167	0.3331
1013	10.0499	11.0454	28.0713	0.3757
1014	10	10.0499	30.0666	0.3334
1015	10.0499	10.0499	28.0713	0.358
1016	10	10	31.0161	0.3224
1017	10.0499	11.0454	28.0713	0.3757
1018	10	10	30.0666	0.3326
1019	10.0499	10.0499	28.0713	0.358
1020	10.0499	10.0499	30.0167	0.3348
1021	10.0499	11.0454	28.0713	0.3757
1022	10.0499	10	30.0666	0.3334
1023	10.0499	11.0454	28.0713	0.3757
1024	10.0499	10.0499	30.0167	0.3348
1025	10	11	28.0713	0.374
1026	10.0499	10.0499	30.0167	0.3348
1027	10.0499	11.0454	28.1603	0.3746
1028	10.0499	10.0499	30.0167	0.3348
1029	9	10.0499	29.0689	0.3277
1030	10	9	30.0666	0.316
1031	10.0499	11.0454	28.0713	0.3757
1032	10	10	30.0167	0.3331
1033	10.0499	11.0454	28.0713	0.3757
1034	11	10	31.0161	0.3385
1035	10	10.0499	28.0179	0.3578
1036	10	10	30.0666	0.3326
1037	10	10.0499	28.0713	0.3571
1038	10	9	31.0644	0.3058
1039	9.0554	10	29.0172	0.3283
1040	10.0499	9.0554	30.0167	0.3182
1041	9	10.0499	28.0179	0.34
1042	10.0499	9	30.0167	0.3173
1043	9	10	27.074	0.3509
1044	9	9	30.0666	0.2993
1045	6	6	26	0.2308
1046	5	6.0828	29.0689	0.1906
1047	5	6	28	0.1964
1048	5.099	6.0828	30.1496	0.1854
1049	5	5.099	27.0185	0.1869
1050	4	5.099	29.0689	0.1565
1051	5	6.0828	27	0.2052
1052	6	6.0828	29.0689	0.2078
1053	6.0828	7	27	0.2423
1054	6	6.0828	29.0689	0.2078
1055	9.0554	9	27.0185	0.3341
1056	9	9	30.0666	0.2993
1057	9.0554	10	28.0713	0.3394
1058	9	9	30.0666	0.2993
1059	9.0554	10	27.0185	0.3526
1060	9	9	30.0666	0.2993
1061	9.0554	10	28.0713	0.3394
1062	9	9	31.0161	0.2902
1063	9	10.0499	28.0713	0.3393
1064	9	9	30.0666	0.2993
1065	10	10.0499	28.0713	0.3571
1066	10	9.0554	31.0644	0.3067
1067	10	10.0499	28.0713	0.3571
1068	9	9	31.0161	0.2902
1069	9	10.0499	28.0713	0.3393
1070	9	9	31.0644	0.2897
1071	10	10	27.074	0.3694
1072	10	9	30.0666	0.316
1073	10	10.0499	28.0713	0.3571
1074	9	9	31.0644	0.2897
1075	10.0499	10	28.0713	0.3571
1076	10	10	30.0167	0.3331
1077	10	11	28.0179	0.3748
1078	11.0454	10.0499	30.0666	0.3508
1079	9	10.0499	28.0179	0.34
1080	9	9.0554	30.0666	0.3003
1081	10.0499	10.0499	28.0179	0.3587
1082	10.0499	9	30.0167	0.3173
1083	10	10.0499	28.0713	0.3571
1084	9	9.0554	30.0666	0.3003
1085	9.0554	10	27.0185	0.3526
1086	9	9	30.0167	0.2998
1087	10.0499	10	28.0713	0.3571
1088	10	9	30.0167	0.3165
1089	10.0499	10	28.0179	0.3578
1090	9.0554	9.0554	30.0666	0.3012
1091	10.0499	10	27.074	0.3703
1092	9	9	30.0167	0.2998
1093	10	10	28.0179	0.3569
1094	9	9.0554	30.0666	0.3003
1095	9	10.0499	28.0179	0.34
1096	9.0554	9	30.0666	0.3003
1097	9.0554	10	28.0713	0.3394
1098	10.0499	9	30.0167	0.3173
1099	10.0499	10.0499	28.0713	0.358
1100	10	10	30.0666	0.3326
1101	10.0499	11.0454	28.0713	0.3757
1102	10	10	31.0161	0.3224
1103	10	10.0499	28.0179	0.3578
1104	10	10	30.0666	0.3326
1105	10.0499	11.0454	28.0713	0.3757
1106	10	10	30.0666	0.3326
1107	10.0499	10.0499	28.0179	0.3587
1108	10	10	30.0666	0.3326
1109	10	11.0454	28.0713	0.3749
1110	10	10	31.0161	0.3224
1111	10	11.0454	28.0713	0.3749
1112	10	10	31.0161	0.3224
1113	10.0499	10.0499	28.0713	0.358
1114	10	10	30.0167	0.3331
1115	10	10.0499	28.0713	0.3571
1116	10	10	30.0167	0.3331
1117	10.0499	10.0499	28.0713	0.358
1118	10	10	31.0161	0.3224
1119	10	11	28.0713	0.374
1120	11	10	31.0161	0.3385
1121	10.0499	10.0499	28.0713	0.358
1122	10	10	30.0666	0.3326
1123	10	11	28.0713	0.374
1124	10.0499	10.0499	30.0666	0.3343
1125	11.0454	10	27.074	0.3887
1126	10	10	30.0167	0.3331
1127	10.0499	11.0454	27.074	0.3896
1128	11	10.0499	30.0666	0.3501
1129	10.0499	11.0454	27.074	0.3896
1130	10.0499	10.0499	30.0167	0.3348
1131	10	10.0499	28.1603	0.356
1132	11.0454	10.0499	30.0666	0.3508
1133	10.0499	10.0499	28.1603	0.3569
1134	10	10	30.0666	0.3326
1135	10.0499	11.0454	28.0713	0.3757
1136	11	10	30.0167	0.3498
1137	11.0454	11.0454	28.0713	0.3935
1138	11	11.0454	30.0167	0.3672
1139	10	11.0454	28.0713	0.3749
1140	11	10	30.0167	0.3498
1141	9	10.0499	28.0179	0.34
1142	9	9.0554	30.0666	0.3003
1143	9	10	27.0185	0.3516
1144	9	9	30.0167	0.2998
1145	10.0499	11	28.0713	0.3749
1146	10	10	30.0167	0.3331
1147	9	10.0499	28.0179	0.34
1148	10	9	30.0167	0.3165
1149	9	10.0499	28.0179	0.34
1150	10.0499	10.0499	30.0666	0.3343
1151	9.0554	10	28.0713	0.3394
1152	10	10	30.0666	0.3326
1153	9.0554	10	28.0179	0.3401
1154	10	10	30.0666	0.3326
1155	9	10	28.0713	0.3384
1156	10	10.0499	30.0167	0.334
1157	9.0554	9	27.0185	0.3341
1158	9	9.0554	29.0689	0.3106
1159	10	10	28.0179	0.3569
1160	10.0499	10	29.0689	0.3449
1161	9.0554	9	27.0185	0.3341
1162	9.0554	9	29.1548	0.3096
1163	9.0554	10.0499	27.0185	0.3536
1164	9.0554	9.0554	30.1496	0.3003
1165	10.0499	10.0499	27.074	0.3712
1166	10.0499	9	29.0689	0.3277
1167	9.0554	10.0499	27.0185	0.3536
1168	10	10.0499	30.0666	0.3334
1169	10.0499	11.0454	27.0185	0.3904
1170	10	10	30.0666	0.3326
1171	10.0499	10	27.0185	0.371
1172	10.0499	10	29.0689	0.3449
1173	10.0499	11	27.0185	0.3895
1174	10	10	30.0666	0.3326
1175	10	11.0454	28.0713	0.3749
1176	10.0499	10.0499	30.0666	0.3343
1177	10.0499	11.0454	27.074	0.3896
1178	11.0454	10.0499	30.0666	0.3508
1179	10.0499	11	28.0713	0.3749
1180	10.0499	10	30.0666	0.3334
1181	10	10.0499	28.0713	0.3571
1182	10.0499	10.0499	30.0666	0.3343
1183	10.0499	10	28.0713	0.3571
1184	10.0499	10.0499	30.0666	0.3343
1185	10.0499	10	28.0713	0.3571
1186	10	10.0499	30.0666	0.3334
1187	10.0499	10.0499	29.1548	0.3447
1188	10.0499	10.0499	29.0689	0.3457
1189	10.0499	10.0499	28.0713	0.358
1190	10	9.0554	30.1496	0.316
1191	10.0499	11.0454	28.0713	0.3757
1192	11	10.0499	31.0644	0.3388
1193	10.0499	10.0499	29.1548	0.3447
1194	10.0499	10.0499	30.1496	0.3333
1195	10.0499	10.0499	29.0689	0.3457
1196	10.0499	10.0499	30.1496	0.3333
1197	10.0499	11.0454	29.1548	0.3618
1198	10.0499	10.0499	31.1448	0.3227
1199	10.0499	9.0554	29.0689	0.3286
1200	10.0499	9.0554	30.1496	0.3168
1201	10.0499	10.0499	29.1548	0.3447
1202	10	10.0499	30.1496	0.3325
1203	10.0499	10.0499	29.1548	0.3447
1204	10.0499	10.0499	31.1448	0.3227
1205	10.0499	10.0499	29.1548	0.3447
1206	10	10.0499	30.1496	0.3325
1207	10.0499	10.0499	29.1548	0.3447
1208	10	9.0554	30.1496	0.316
1209	10.198	10.0499	29.1548	0.3472
1210	11.0454	10.0499	30.1496	0.3498
1211	10.0499	10.0499	29.1548	0.3447
1212	10.0499	10.0499	30.1496	0.3333
1213	10.0499	11.0454	29.1548	0.3618
1214	10.0499	10.0499	30.1496	0.3333
1215	10.0499	10.0499	30.1496	0.3333
1216	11.0454	10.0499	30.0666	0.3508
1217	10.0499	10.0499	29.1548	0.3447
1218	10.0499	10.0499	30.1496	0.3333
1219	9.0554	10.0499	29.1548	0.3277
1220	10.0499	9.0554	31.1448	0.3067
1221	10.0499	10.0499	29.0689	0.3457
1222	10	10	30.0666	0.3326
1223	10.0499	10.0499	30.0666	0.3343
1224	10.0499	9.0554	30.0666	0.3177
1225	10.0499	10.0499	30.1496	0.3333
1226	10.0499	10.0499	31.1448	0.3227
1227	10	11.0454	30.1496	0.349
1228	10	10	30.1496	0.3317
1229	10.0499	10.0499	29.1548	0.3447
1230	10.0499	9.0554	31.1448	0.3067
1231	10.0499	11.0454	30.1496	0.3498
1232	10.0499	9.0554	30.1496	0.3168
1233	10.0499	10.0499	30.1496	0.3333
1234	10	10.0499	30.1496	0.3325
1235	10.0499	11.1803	30.1496	0.3521
1236	10	9	30.1496	0.3151
1237	10	10.0499	29.1548	0.3439
1238	10.0499	10.0499	30.1496	0.3333
1239	10.0499	10.0499	29.1548	0.3447
1240	10	9.0554	29.1548	0.3268
1241	10.0499	10.0499	29.0689	0.3457
1242	11.0454	10.0499	30.1496	0.3498
1243	10.0499	10.0499	30.1496	0.3333
1244	11.0454	10.0499	30.0666	0.3508
1245	10.0499	10.0499	29.0689	0.3457
1246	10.0499	10	30.0666	0.3334
1247	10.0499	11.0454	30.0666	0.3508
1248	10.0499	10.0499	30.0666	0.3343
1249	10.0499	10.0499	29.1548	0.3447
1250	10	10.0499	30.1496	0.3325
1251	10.0499	11.0454	30.1496	0.3498
1252	11.0454	10.0499	30.1496	0.3498
1253	10.0499	11.0454	29.1548	0.3618
1254	11.0454	11.0454	30.1496	0.3664
1255	10.0499	11	29.1548	0.361
1256	11.0454	10	30.1496	0.349
1257	10.0499	11.0454	29.1548	0.3618
1258	11.0454	11.0454	30.1496	0.3664
1259	11.0454	12.0416	29.1548	0.3959
1260	11	11	30.0666	0.3659
1261	11	12.0416	29.0689	0.3963
1262	11	11	31.0644	0.3541
1263	11.0454	11	29.1548	0.3781
1264	12	10	31.0644	0.3541
1265	11.0454	11.0454	29.0689	0.38
1266	10.0499	10.0499	30.0666	0.3343
1267	11.0454	11.0454	29.1548	0.3789
1268	11.0454	11.0454	30.0666	0.3674
1269	10.0499	11.0454	29.1548	0.3618
1270	10	10	31.0644	0.3219
1271	11.0454	12.0416	29.0689	0.3971
1272	11.0454	11	30.0666	0.3666
1273	10.0499	11.0454	29.1548	0.3618
1274	10	10	30.0666	0.3326
1275	10.0499	11.0454	29.1548	0.3618
1276	11.0454	10	30.0666	0.35
1277	10.0499	11.0454	29.1548	0.3618
1278	11.0454	10	30.0666	0.35
1279	11	11.0454	28.0713	0.3927
1280	10.0499	10.0499	30.0666	0.3343
1281	10.0499	11.0454	29.1548	0.3618
1282	10	10	30.0666	0.3326
1283	10	11.0454	29.1548	0.3609
1284	11.0454	10.0499	30.0666	0.3508
1285	10.0499	11.0454	29.1548	0.3618
1286	10.0499	10	30.0666	0.3334
1287	10	11.0454	28.0713	0.3749
1288	10	10	30.0666	0.3326
1289	11	10.0499	28.0713	0.3749
1290	10.0499	10.0499	29.0689	0.3457
1291	11	11	29.1548	0.3773
1292	11.0454	11.0454	30.0666	0.3674
1293	10.0499	11.0454	29.1548	0.3618
1294	10.0499	10.0499	30.0666	0.3343
1295	11.0454	10.0499	29.0689	0.3628
1296	10	10	30.0666	0.3326
1297	11.0454	11.0454	29.0689	0.38
1298	11	10	31.0644	0.338
1299	11.0454	11.0454	29.0689	0.38
1300	10	10.0499	31.0644	0.3227
1301	9.0554	10.0499	28.0713	0.3403
1302	10.0499	9.0554	30.1496	0.3168
1303	5	5	27.0185	0.1851
1304	5.099	5.099	29.1548	0.1749
1305	6	7.0711	28.0179	0.2333
1306	6	6.3246	30.2655	0.2036
1307	7	7.0711	28.0179	0.2511
1308	7.0711	7.0711	30.2655	0.2336
1309	9	9	28.0713	0.3206
1310	8	8.0623	30.1496	0.2664
1311	10	10.0499	28.0713	0.3571
1312	10.0499	9.0554	30.1496	0.3168
1313	10.0499	11	29.0689	0.3621
1314	10.0499	10.0499	30.1496	0.3333
1315	10.0499	10.0499	27.074	0.3712
1316	10.0499	9	30.1496	0.3159
1317	10.0499	10.0499	29.1548	0.3447
1318	11	9	30.1496	0.3317
1319	10.0499	11.0454	29.0689	0.3628
1320	11	11	30.1496	0.3648
1321	10	11.0454	29.0689	0.362
1322	10.0499	9.0554	30.1496	0.3168
1323	10.0499	11.0454	28.0713	0.3757
1324	10.0499	10.0499	29.1548	0.3447
1325	10.0499	11	29.0689	0.3621
1326	10.0499	9.0554	31.0644	0.3075
1327	10	11.0454	29.1548	0.3609
1328	10.0499	11.0454	30.1496	0.3498
1329	10.0499	10	29.1548	0.3439
1330	10.0499	10.0499	30.1496	0.3333
1331	10	10.0499	28.1603	0.356
1332	10	10	30.0666	0.3326
1333	10.0499	10.0499	29.1548	0.3447
1334	10	10	30.1496	0.3317
1335	10.0499	11.0454	28.0713	0.3757
1336	10	9	30.0666	0.316
1337	10.0499	11.0454	29.0689	0.3628
1338	11	10.0499	31.0644	0.3388
1339	10.0499	11.0454	29.1548	0.3618
1340	11	10	31.0644	0.338
1341	10.0499	11.0454	28.1603	0.3746
1342	11.0454	10.0499	31.0644	0.3395
1343	10.0499	11.0454	28.1603	0.3746
1344	11.0454	11.0454	31.0161	0.3561
1345	11.0454	10.0499	28.0713	0.3757
1346	11	10.0499	31.0644	0.3388
1347	10.0499	11.0454	28.0713	0.3757
1348	10.0499	10.0499	31.0644	0.3235
1349	10.0499	11.0454	28.0713	0.3757
1350	10.0499	10.0499	29.0689	0.3457
1351	10	11.0454	28.0713	0.3749
1352	10.0499	10.0499	30.0666	0.3343
1353	11.0454	11.0454	28.0713	0.3935
1354	10.0499	10.0499	30.0666	0.3343
1355	10.0499	10	29.0689	0.3449
1356	10	10	30.0666	0.3326
1357	11.0454	10.0499	28.0713	0.3757
1358	10	10	30.0666	0.3326
1359	11.0454	11.0454	28.0713	0.3935
1360	11.0454	10.0499	30.0167	0.3514
1361	11.0454	12.0416	28.0713	0.4112
1362	11	11.0454	31.0644	0.3548
1363	11	11.0454	28.0713	0.3927
1364	11.0454	11.0454	30.0666	0.3674
1365	10.0499	11.0454	28.0713	0.3757
1366	11.0454	10.0499	30.0666	0.3508
1367	11	11.0454	28.0713	0.3927
1368	11	10.0499	31.0644	0.3388
1369	11.0454	11.0454	28.0713	0.3935
1370	11.0454	11.0454	30.1496	0.3664
1371	11.0454	11.0454	28.0713	0.3935
1372	11.0454	11.0454	30.0666	0.3674
1373	10	10.0499	28.0713	0.3571
1374	11.0454	10.0499	30.0666	0.3508
1375	11.0454	12.0416	28.0713	0.4112
1376	11	11	30.0666	0.3659
1377	11.0454	11.0454	29.0689	0.38
1378	10	11	30.1496	0.3483
1379	11.0454	11.0454	29.0689	0.38
1380	11	11	30.0666	0.3659
1381	10.0499	11.0454	28.0713	0.3757
1382	10	10.0499	31.0644	0.3227
1383	10.0499	11.0454	28.1603	0.3746
1384	11	10.0499	31.0644	0.3388
1385	11.0454	11.0454	28.0713	0.3935
1386	10	10.0499	31.0644	0.3227
1387	10.0499	11.0454	28.0713	0.3757
1388	10	10.0499	31.0644	0.3227
1389	10.0499	11.0454	29.0689	0.3628
1390	10	10.0499	31.0644	0.3227
1391	11	11.0454	28.0713	0.3927
1392	11.0454	10.0499	31.0161	0.3401
1393	11	11.0454	28.0713	0.3927
1394	10.0499	10.0499	30.0666	0.3343
1395	10	11.0454	28.0713	0.3749
1396	10.0499	10.0499	30.0666	0.3343
1397	10.0499	11.0454	28.0713	0.3757
1398	10.0499	10.0499	30.0666	0.3343
1399	11	11.0454	28.0713	0.3927
1400	11	11	30.0666	0.3659
1401	11.0454	11.0454	28.0713	0.3935
1402	11.0454	11.0454	30.0167	0.368
1403	11.0454	11.0454	28.0713	0.3935
1404	11.0454	10.0499	30.0666	0.3508
1405	11.0454	11	29.0689	0.3792
1406	11.0454	10.0499	30.0167	0.3514
1407	11.0454	11.0454	29.0689	0.38
1408	11.0454	11	30.0167	0.3672
1409	11.0454	11	28.0713	0.3927
1410	11	11	30.0167	0.3665
1411	11.0454	10.0499	29.0689	0.3628
1412	10	10	30.0666	0.3326
1413	10.0499	11	28.0713	0.3749
1414	10	10	30.0666	0.3326
1415	11.0454	11	29.0689	0.3792
1416	11.0454	11.0454	30.0666	0.3674
1417	11.0454	11.0454	29.0689	0.38
1418	11.0454	11	30.0167	0.3672
1419	11.0454	11.0454	28.0713	0.3935
1420	11	10	30.0666	0.3492
1421	11.0454	11	28.0713	0.3927
1422	11	10.0499	30.0167	0.3506
1423	11.0454	11	27.074	0.4071
1424	11	11	30.0167	0.3665
1425	11.0454	10.0499	28.0713	0.3757
1426	11	10.0499	30.0666	0.3501
1427	11.0454	10	27.074	0.3887
1428	11.0454	10.0499	30.0666	0.3508
1429	11.0454	11.0454	28.0713	0.3935
1430	11.0454	11.0454	31.0644	0.3556
1431	11.0454	11.0454	28.0713	0.3935
1432	11	11.0454	31.1448	0.3539
1433	10.0499	11.0454	28.0713	0.3757
1434	10.0499	10.0499	30.0666	0.3343
1435	11.0454	10	28.0713	0.3749
1436	10.0499	10.0499	31.0644	0.3235
1437	10.0499	10.0499	29.0689	0.3457
1438	10.0499	10.0499	30.0666	0.3343
1439	10.0499	10.0499	28.0713	0.358
1440	9.0554	9.0554	30.0666	0.3012
1441	10.0499	10.0499	28.0713	0.358
1442	10.0499	10.0499	30.0666	0.3343
1443	10.0499	11.0454	28.0713	0.3757
1444	10.0499	10.0499	30.0167	0.3348
1445	10.0499	11.0454	27.074	0.3896
1446	10.0499	10.0499	30.0666	0.3343
1447	10.0499	10	28.0179	0.3578
1448	10.0499	10.0499	30.0666	0.3343
1449	10.0499	11.0454	29.0689	0.3628
1450	10.0499	10.0499	30.0666	0.3343
1451	10.0499	10.0499	27.074	0.3712
1452	10	10.0499	30.0666	0.3334
1453	11.0454	10	28.0713	0.3749
1454	10.0499	10.0499	30.0666	0.3343
1455	10.0499	10	28.0713	0.3571
1456	10	10.0499	30.0666	0.3334
1457	11.0454	10.0499	29.0689	0.3628
1458	10.0499	10.0499	30.0666	0.3343
1459	10.0499	10	28.0713	0.3571
1460	10.0499	10.0499	30.0666	0.3343
1461	10.0499	10.0499	28.0713	0.358
1462	10.0499	10.0499	30.0666	0.3343
1463	10	10.0499	28.0713	0.3571
1464	10	10	30.0666	0.3326
1465	10.0499	10.0499	28.0713	0.358
1466	10.0499	10.0499	30.0666	0.3343
1467	10	10.0499	28.0179	0.3578
1468	10	10.0499	30.0167	0.334
1469	10.0499	10.0499	28.0713	0.358
1470	10.0499	10.0499	30.0167	0.3348
1471	10.0499	10	28.0713	0.3571
1472	10.0499	9.0554	30.0666	0.3177
1473	11.0454	11	28.0179	0.3934
1474	10.0499	10.0499	30.0167	0.3348
1475	11.0454	11	28.0713	0.3927
1476	11.0454	11	31.0644	0.3548
1477	11	10.0499	28.0713	0.3749
1478	11.0454	10.0499	30.0666	0.3508
1479	10.0499	10	28.0713	0.3571
1480	10	10.0499	30.0666	0.3334
1481	10.0499	10.0499	28.0713	0.358
1482	10	10	30.0666	0.3326
1483	10	10.0499	28.0713	0.3571
1484	10.0499	10.0499	30.0666	0.3343
1485	10.0499	10.0499	28.0713	0.358
1486	10.0499	10.0499	30.0666	0.3343
1487	10	10.0499	28.0713	0.3571
1488	10.0499	10.0499	30.0666	0.3343
1489	10.0499	10.0499	28.0713	0.358
1490	10.0499	10.0499	30.0666	0.3343
1491	10.0499	11.0454	27.074	0.3896
1492	10.0499	10.0499	30.0666	0.3343
1493	10.0499	10.0499	27.074	0.3712
1494	10.0499	10.0499	30.0666	0.3343
1495	10.0499	10	28.0713	0.3571
1496	10.0499	10.0499	30.0167	0.3348
1497	10	10.0499	28.0713	0.3571
1498	10	9.0554	30.0666	0.3169
1499	10.0499	11.0454	29.0689	0.3628
1500	10	10.0499	30.0666	0.3334
1501	10	10.0499	28.0713	0.3571
1502	10.0499	9	30.0666	0.3168
1503	10.0499	10.0499	28.0713	0.358
1504	10.0499	10.0499	30.0666	0.3343
1505	10.0499	10	28.0713	0.3571
1506	10.0499	9.0554	31.0644	0.3075
1507	10.0499	10.0499	27.074	0.3712
1508	10.0499	10.0499	31.0644	0.3235
1509	11.0454	11	28.0713	0.3927
1510	10	10	30.0666	0.3326
1511	10.0499	10.0499	27.074	0.3712
1512	10.0499	10.0499	31.0644	0.3235
1513	10.0499	10.0499	28.0713	0.358
1514	10.0499	10.0499	31.0644	0.3235
1515	10.0499	9	28.0713	0.3393
1516	10	10.0499	30.0167	0.334
1517	10.0499	10	28.0713	0.3571
1518	10	9.0554	30.0666	0.3169
1519	10	10.0499	28.0713	0.3571
1520	11	9.0554	31.0644	0.3228
1521	10	10.0499	28.0713	0.3571
1522	10	10	30.0167	0.3331
1523	10	11.0454	27.074	0.3887
1524	10	10	31.0161	0.3224
1525	10.0499	10	28.0179	0.3578
1526	10	10	30.0167	0.3331
1527	10	10	27	0.3704
1528	9	10	30	0.3167
1529	10	10	27.0185	0.3701
1530	10	10	30.0167	0.3331
1531	9	10	28.0179	0.3391
1532	10	10	31.0161	0.3224
1533	9	9.0554	27.0185	0.3341
1534	9	10	30.0167	0.3165
1535	10	10	28.0179	0.3569
1536	10	10	31.0161	0.3224
1537	9.0554	10	27.0185	0.3526
1538	10.0499	10	30.0666	0.3334
1539	10.0499	11	27.074	0.3887
1540	10.0499	11.0454	30.0666	0.3508
1541	9	10.0499	28.0179	0.34
1542	10.0499	10	31.0161	0.3232
1543	9	10.0499	28.0179	0.34
1544	10	10	30.0666	0.3326
1545	10.0499	11	27.074	0.3887
1546	10	10.0499	30.0167	0.334
1547	10	11	27.074	0.3878
1548	10	10	31.0644	0.3219
1549	10.0499	10.0499	27.074	0.3712
1550	10	10	30.0666	0.3326
1551	10.0499	10.0499	28.0713	0.358
1552	10	11	31.0644	0.338
1553	11	10.0499	27.0185	0.3895
1554	10	11	31.0644	0.338
1555	11	11.0454	27.0185	0.408
1556	11	11	31.0644	0.3541
1557	11.0454	11.0454	27.074	0.408
1558	11.0454	11.0454	30.0666	0.3674
1559	10.0499	10.0499	28.0713	0.358
1560	10.0499	10.0499	30.0167	0.3348
1561	10.0499	11	28.0713	0.3749
1562	10	10.0499	30.0666	0.3334
1563	10.0499	10	28.0179	0.3578
1564	10.0499	10.0499	30.0666	0.3343
1565	9	9	28.0179	0.3212
1566	9.0554	9.0554	30.0666	0.3012
1567	10	10.0499	28.0713	0.3571
1568	10	10.0499	30.0167	0.334
1569	10.0499	11.0454	28.0713	0.3757
1570	10	11.0454	30.0666	0.35
1571	10.0499	10	28.0713	0.3571
1572	9.0554	9.0554	31.0644	0.2915
1573	10.0499	10.0499	28.0713	0.358
1574	9	9	30.1496	0.2985
1575	9.0554	10.0499	28.0713	0.3403
1576	10	9	30.0666	0.316
1577	10.0499	10.0499	28.0713	0.358
1578	11.0454	10.0499	31.0644	0.3395
1579	10.0499	11.0454	28.0713	0.3757
1580	10.0499	10	31.0161	0.3232
1581	10.0499	11.0454	28.0713	0.3757
1582	10	10	30.0666	0.3326
1583	10.0499	11.0454	28.1603	0.3746
1584	10	10	30.0666	0.3326
1585	11	11.0454	28.1603	0.3914
1586	11	11.0454	30.0167	0.3672
1587	10.0499	11.0454	28.1603	0.3746
1588	10.0499	10.0499	31.0644	0.3235
1589	11.0454	11.0454	28.0713	0.3935
1590	11.0454	10.0499	31.0644	0.3395
1591	11.0454	10.0499	28.1603	0.3746
1592	11	10.0499	30.0666	0.3501
1593	11.0454	10.0499	28.1603	0.3746
1594	11.0454	11.0454	30.0666	0.3674
1595	11.0454	12	28.0713	0.4105
1596	11.0454	11.0454	31.0161	0.3561
1597	11.0454	11.0454	27.074	0.408
1598	11.0454	11.0454	30.0167	0.368
1599	11.0454	11.1803	27.074	0.4105
1600	11.0454	11.0454	30.0666	0.3674
1601	10.0499	11	27.1662	0.3874
1602	10	10	30.0666	0.3326
1603	10.0499	11.0454	28.0713	0.3757
1604	10.0499	10.0499	30.0666	0.3343
1605	8	8.0623	27	0.2974
1606	7	7	28.1603	0.2486
1607	5	6.0828	26.0192	0.213
1608	5	5.099	29.1548	0.1732
1609	5	6	26.0192	0.2114
1610	4.1231	5.099	29.0689	0.1586
1611	5	6.0828	26	0.2131
1612	5	6	29.0689	0.1892
1613	7	8	26.0192	0.2882
1614	7	7	29.0689	0.2408
1615	8	8	26	0.3077
1616	8	8	29.0172	0.2757
1617	9.0554	10.0499	26	0.3674
1618	8	9.0554	29.0172	0.2939
1619	9	10	26.0192	0.3651
1620	9.0554	10	30.0167	0.3174
1621	9	10	26.0192	0.3651
1622	9.0554	9	29.0172	0.3111
1623	9	9	26.0768	0.3451
1624	9	9	29	0.3103
1625	9	9	24.0832	0.3737
1626	9	9	28.0179	0.3212
1627	9	10.0499	25.0799	0.3798
1628	9	9	29.0172	0.3102
1629	9.0554	9.0554	25.1794	0.3596
1630	9	9.0554	29.0172	0.3111
1631	7.0711	7.2801	25.4951	0.2814
1632	5.099	6.0828	29.0689	0.1923
1633	7.2801	7.2801	24.5153	0.297
1634	5.099	6.0828	28.0179	0.1995
1635	6.0828	6.0828	25.4951	0.2386
1636	6.0828	7.0711	29.0689	0.2263
1637	5.3852	5.099	24.5153	0.2138
1638	4.1231	5	28.0179	0.1628
1639	5.099	6.3246	24.1868	0.2362
1640	4.1231	5	29.0172	0.1572
1641	5.099	5.099	23.1948	0.2198
1642	4.1231	5.099	28.0179	0.1646
1643	6.0828	7.0711	23.0217	0.2857
1644	6.0828	7.0711	28.0179	0.2347
1645	8.0623	9	22.0227	0.3874
1646	7	8.0623	28.0179	0.2688
1647	8	8.0623	22.0227	0.3647
1648	6	7.0711	28	0.2334
1649	8.0623	9	23	0.3709
1650	7	8.0623	28	0.269
1651	7	8	23	0.3261
1652	6	8	29.0172	0.2412
1653	8	9	23	0.3696
1654	8	8	28	0.2857
1655	10	10.0499	26.0768	0.3844
1656	9	10	30.0167	0.3165
1657	10.0499	11.0454	27.074	0.3896
1658	10	11	30.0167	0.3498
1659	10.0499	10.0499	28.1603	0.3569
1660	10	10	30	0.3333
1661	10.0499	10.0499	27.1662	0.3699
1662	10	10	30.0167	0.3331
1663	9.0554	10.0499	27.1662	0.3516
1664	10.0499	10	30.0666	0.3334
1665	10.0499	10.0499	28.1603	0.3569
1666	9	10.0499	30.0666	0.3168
1667	10.0499	10.0499	28.1603	0.3569
1668	10	9.0554	29.0172	0.3283
1669	10.198	10.0499	28.2843	0.3579
1670	10	10	30.0167	0.3331
1671	9.2195	10.0499	29.1548	0.3305
1672	10	9	30.0666	0.316
1673	10.0499	10.0499	29.2746	0.3433
1674	10	10.0499	30.0666	0.3334
1675	9.0554	10.198	29.2746	0.3288
1676	10	10	30.0666	0.3326
1677	10.198	11.0454	28.4429	0.3734
1678	11	9.0554	30.0666	0.3335
1679	10.198	10.0499	28.2843	0.3579
1680	10	10	30.0666	0.3326
1681	10.0499	10.198	28.4429	0.3559
1682	10	10.0499	30.1496	0.3325
1683	10.198	11.0454	29.2746	0.3628
1684	10.0499	9.0554	29.1548	0.3277
1685	10.0499	10.0499	28.2843	0.3553
1686	10.0499	10.0499	30.1496	0.3333
1687	10.0499	11.1803	28.4429	0.3732
1688	10	11.0454	29.1548	0.3609
1689	10.198	11.0454	28.6356	0.3709
1690	10.0499	10.0499	30.1496	0.3333
1691	9.2195	10.0499	28.4429	0.3387
1692	10.0499	10	30.1496	0.3325
1693	9.2195	10.0499	28.6356	0.3365
1694	10.0499	9.0554	29.1548	0.3277
1695	9.2195	10.0499	28.4429	0.3387
1696	10.0499	10	29.1548	0.3439
1697	10.198	11.1803	28.6356	0.3733
1698	10	10.0499	30.1496	0.3325
1699	10.198	10.0499	28.4429	0.3559
1700	10.0499	9	29.1548	0.3267
1701	10.198	10.0499	29.4279	0.344
1702	10.0499	10.0499	30.1496	0.3333
1703	10.198	10.198	28.4429	0.3585
1704	10.0499	10.0499	29.2746	0.3433
1705	9.2195	10.0499	28.6356	0.3365
1706	10.0499	10.0499	30.2655	0.3321
1707	9.2195	10.0499	28.4429	0.3387
1708	10.0499	10.0499	30.2655	0.3321
1709	10.198	11.0454	28.4429	0.3734
1710	11.0454	10.0499	29.2746	0.3603
1711	7.0711	7.2801	27.4591	0.2613
1712	8.0623	7.0711	29.4279	0.2571
1713	6.0828	5.3852	27.4591	0.2088
1714	5.099	5.3852	29.8329	0.1757
1715	4.4721	5.3852	26.4764	0.1862
1716	5.3852	5.3852	28.8617	0.1866
1717	6.3246	6.3246	27.6586	0.2287
1718	6.3246	6.7082	30.3645	0.2146
1719	9.2195	9.2195	27.8927	0.3305
1720	9.2195	9.4868	30.0832	0.3109
1721	8.2462	10.4403	28.1603	0.3318
1722	9.2195	9.2195	29.1204	0.3166
1723	9.2195	10.198	28.8617	0.3364
1724	9.2195	9.2195	30.0832	0.3065
1725	9.2195	10.198	28.8617	0.3364
1726	10.198	10.198	29.8329	0.3418
1727	10.198	10.4403	29.8329	0.3459
1728	11.1803	10.198	30.8058	0.347
1729	9.2195	10.4403	28.8617	0.3406
1730	11.0454	10.198	30.5941	0.3472
1731	9.4868	10.198	28.8617	0.341
1732	11.1803	10.198	30.8058	0.347
1733	10.198	11.1803	28.8617	0.3704
1734	11.0454	10.198	30.8058	0.3448
1735	10.198	11.1803	28.8617	0.3704
1736	11.1803	10.198	29.6142	0.3609
1737	10.198	11.1803	29.6142	0.3609
1738	10.0499	10.198	30.5941	0.3309
1739	10.198	11.1803	27.6586	0.3865
1740	10.198	10.0499	30.5941	0.3309
1741	10.198	11.1803	27.6586	0.3865
1742	11.1803	10.0499	29.6142	0.3584
1743	10.198	10.0499	27.4591	0.3687
1744	11.1803	11.0454	29.6142	0.3753
1745	10.198	11.1803	28.6356	0.3733
1746	10.0499	11.0454	30.4138	0.3468
1747	10.198	11.1803	28.4429	0.3758
1748	10.0499	10.198	29.4279	0.344
1749	10.198	11.1803	29.6142	0.3609
1750	11.1803	10.0499	30.2655	0.3507
1751	10.198	11.1803	28.4429	0.3758
1752	10.0499	10.0499	30.4138	0.3304
1753	6.0828	7.0711	28.2843	0.2325
1754	7.0711	7.0711	30.2655	0.2336
1755	5.099	5.099	27.1662	0.1877
1756	5.3852	4.1231	30.4138	0.1563
1757	5.099	5.099	28.0713	0.1816
1758	4.1231	4.1231	29.4279	0.1401
1759	8.0623	8.0623	28.1603	0.2863
1760	7.0711	7.0711	30.2655	0.2336
1761	9.0554	9.0554	28.1603	0.3216
1762	8	9.0554	31.1448	0.2738
1763	9.0554	10	29.1548	0.3268
1764	9.0554	10	31.1448	0.3059
1765	10.0499	10.198	29.1548	0.3472
1766	10.0499	9.0554	30.0666	0.3177
1767	10.0499	10.0499	28.0713	0.358
1768	10.0499	10.0499	31.0161	0.324
1769	10.0499	11	29.0689	0.3621
1770	11	11	32.0156	0.3436
1771	11.0454	11.0454	30.0666	0.3674
1772	10	10.0499	32.0156	0.3131
1773	11.0454	11.0454	30.0666	0.3674
1774	11	10	31.0161	0.3385
1775	11	11	30.0167	0.3665
1776	11	10.0499	32.0624	0.3283
1777	11	11.0454	31.0644	0.3548
1778	11	11.0454	33.0151	0.3339
1779	11	11.0454	30.0666	0.3666
1780	11	10.0499	32.0624	0.3283
1781	11.0454	11	30.0666	0.3666
1782	10.0499	10	32.0624	0.3127
1783	11.0454	11	30.0666	0.3666
1784	10	10.0499	32.0156	0.3131
1785	10.0499	11	30.0666	0.3501
1786	11.0454	11	32.0624	0.3438
1787	11.0454	12.0416	30.0666	0.3839
1788	11	10	31.0644	0.338
1789	10.0499	11.0454	30.0666	0.3508
1790	11	11.0454	31.0644	0.3548
1791	10.0499	11.0454	30.1496	0.3498
1792	11	10.0499	31.0644	0.3388
1793	10.0499	11.0454	30.0666	0.3508
1794	10.0499	10	32.0624	0.3127
1795	10.0499	11	30.0666	0.3501
1796	10	10.0499	32.0624	0.3127
1797	10.0499	11.0454	30.0666	0.3508
1798	11.0454	10	32.0624	0.3282
1799	11	11	30.0167	0.3665
1800	11	10	31.0644	0.338
1801	11.0454	10	29	0.3629
1802	10.0499	9.0554	31.0161	0.308
1803	11.0454	11	29.0172	0.3799
1804	11	10.0499	31.0161	0.3393
1805	10	10	29	0.3448
1806	10	10	31.0161	0.3224
1807	10	10	29.0689	0.344
1808	10	10	30	0.3333
1809	10	10.0499	28.0713	0.3571
1810	10	9	30.0167	0.3165
1811	11.0454	11	29.0689	0.3792
1812	10.0499	10.0499	30.0167	0.3348
1813	10	10.0499	28.2843	0.3544
1814	10	10	30.0167	0.3331
1815	10.0499	10.198	27.2947	0.3709
1816	9.0554	9	30.0666	0.3003
1817	10.0499	10.0499	28.2843	0.3553
1818	9.0554	10	29.1548	0.3268
1819	10	10.198	27.4591	0.3678
1820	9.0554	9.0554	29.1548	0.3106
1821	7.0711	6.0828	26.9258	0.2443
1822	6.0828	6.0828	27.074	0.2247
1823	5.3852	4.4721	25.9615	0.1898
1824	4.1231	4.1231	27.074	0.1523
1825	4.4721	4.4721	27.2029	0.1644
1826	4	4	27.0185	0.148
1827	5.3852	6.3246	25.9615	0.2255
1828	5.099	6.0828	27.074	0.2065
1829	6.3246	6.3246	26.9258	0.2349
1830	6.0828	6	27.1662	0.2224
1831	8.2462	7.2801	26.6833	0.2909
1832	8.0623	7	28.0713	0.2683
1833	8.0623	8.0623	27.6586	0.2915
1834	7	8.0623	28.0179	0.2688
1835	8.2462	8.0623	27.6586	0.2948
1836	8.0623	8.0623	28.0179	0.2878
1837	8.0623	8.2462	26.6833	0.3056
1838	8	8	29.0689	0.2752
1839	9.0554	9.0554	27.2947	0.3318
1840	9.0554	9.0554	29.0172	0.3121
1841	9.0554	9.0554	28.2843	0.3202
1842	9	8.0623	29.0172	0.294
1843	10.0499	10.0499	28.2843	0.3553
1844	10	9	29.0172	0.3274
1845	9.0554	9	29.1548	0.3096
1846	10.0499	10	29.0172	0.3455
1847	10.0499	10.0499	28.0179	0.3587
1848	10	9	29	0.3276
1849	10	10.0499	28.0179	0.3578
1850	9	10.0499	29.0172	0.3283
1851	10	10	28	0.3571
1852	10	10	29	0.3448
1853	11.0454	10	29	0.3629
1854	11	10	29.0172	0.3619
1855	11	11	29.0172	0.3791
1856	10	10	30	0.3333
1857	9	11.0454	29.0172	0.3454
1858	10	10	29	0.3448
1859	10.0499	10	28.0179	0.3578
1860	10	10	29.0172	0.3446
1861	10	10	28.0179	0.3569
1862	10	10	29.0172	0.3446
1863	10.0499	11	29.0689	0.3621
1864	10	10	29.0172	0.3446
1865	10.0499	11.0454	29.0689	0.3628
1866	10	10.0499	29.0172	0.3455
1867	10	10.0499	29.0689	0.3449
1868	10	11	29.0689	0.3612
1869	10.0499	11.0454	29.1548	0.3618
1870	10.0499	10	29.0689	0.3449
1871	10.0499	10.0499	29.1548	0.3447
1872	11.0454	10.0499	29.1548	0.3618
1873	10.198	10.0499	28.1603	0.3595
1874	10.0499	9.0554	28.1603	0.3392
1875	10.0499	10.0499	29.1548	0.3447
1876	11.0454	10.0499	29.2746	0.3603
1877	10.0499	10.198	29.2746	0.3458
1878	10.0499	10.0499	28.1603	0.3569
1879	10.0499	10.0499	29.2746	0.3433
1880	10.0499	10.0499	29.1548	0.3447
1881	10.0499	10.198	29.2746	0.3458
1882	11	10.0499	29.2746	0.3595
1883	10.0499	10.0499	29.1548	0.3447
1884	11.0454	9	29.1548	0.3438
1885	11.1803	11.0454	29.1548	0.3812
1886	11.0454	11	29.1548	0.3781
1887	10.0499	11.0454	29.1548	0.3618
1888	11	10.0499	29.0689	0.3621
1889	8.0623	9.0554	27.074	0.3161
1890	8.0623	8	27.1662	0.2956
1891	5	5.099	27	0.187
1892	5.099	6.0828	27.4591	0.2036
1893	6	5	27	0.2037
1894	5	6	28.2843	0.1945
1895	8	8	28	0.2857
1896	8	8	28.1603	0.2841
1897	9.0554	9.0554	28.0179	0.3232
1898	9	9	29.0689	0.3096
1899	10.0499	10	28.0179	0.3578
1900	10	10	29.0172	0.3446
1901	10	10	29.0172	0.3446
1902	10	10	29.0172	0.3446
1903	11.0454	11	29.0172	0.3799
1904	11	10	29.0172	0.3619
1905	11.0454	11	29.0689	0.3792
1906	10	10	29.0172	0.3446
1907	10.0499	11	29.0172	0.3627
1908	10	10	29.0172	0.3446
1909	11.0454	11	29.0689	0.3792
1910	10	10	30	0.3333
1911	10.0499	10	29.0172	0.3455
1912	10	10	30.0167	0.3331
1913	11.0454	12.0416	29.0689	0.3971
1914	11	11	30.0167	0.3665
1915	10.0499	10	28.0179	0.3578
1916	10	10	30.0666	0.3326
1917	10.0499	11	29.0689	0.3621
1918	11	10	29.0172	0.3619
1919	11	11.0454	29.0689	0.3792
1920	10.0499	10	29.0172	0.3455
1921	10.0499	11.0454	30.1496	0.3498
1922	11	10	30.0167	0.3498
1923	11.0454	11.0454	30.0666	0.3674
1924	11	10	29.0172	0.3619
1925	11.0454	11.0454	29.0689	0.38
1926	11	10	29.0689	0.3612
1927	11.0454	11	29.1548	0.3781
1928	11	11	29	0.3793
1929	10	11.0454	29.1548	0.3609
1930	11	11	29.0172	0.3791
1931	11.0454	12.0416	30.0666	0.3839
1932	11	11	30.0167	0.3665
1933	11.0454	12.0416	29.1548	0.3959
1934	11	11	29.0172	0.3791
1935	11	11.0454	29.1548	0.3781
1936	11.0454	11	29.0689	0.3792
1937	11	12	29.1548	0.3944
1938	11.0454	11	29.0689	0.3792
1939	11.0454	11.0454	28.0713	0.3935
1940	11	11	30.0666	0.3659
1941	11.0454	12.0416	29.1548	0.3959
1942	12	11	29.0172	0.3963
1943	10	11.0454	29.0689	0.362
1944	11	11	29.0172	0.3791
1945	10.0499	11	29.0689	0.3621
1946	10	10	29.0172	0.3446
1947	11.0454	10.0499	29.0689	0.3628
1948	11	11	29.0172	0.3791
1949	10	11	29.0689	0.3612
1950	11.0454	10	29.0172	0.3626
1951	11.0454	11.0454	29.0689	0.38
1952	11.0454	10	30.0167	0.3506
1953	11	11.0454	29.0172	0.3799
1954	11	11	30.0167	0.3665
1955	10	11.0454	28.0179	0.3756
1956	11	11	30.0666	0.3659
1957	10	10	29	0.3448
1958	11	10	30.0167	0.3498
1959	11	11.0454	29	0.3801
1960	11	11.0454	31.0644	0.3548
1961	10	10	29	0.3448
1962	10	10	31.0644	0.3219
1963	11.0454	11	29	0.3801
1964	11	11	30.0167	0.3665
1965	11	11	29	0.3793
1966	11	10.0499	31	0.3395
1967	11	11.0454	28	0.3937
1968	11	11	30.0167	0.3665
1969	10	10	28	0.3571
1970	10	10.0499	30.0666	0.3334
1971	11	11	29	0.3793
1972	11.0454	10	30.0666	0.35
1973	10	11	29	0.3621
1974	10	10	30.0167	0.3331
1975	9	10	29	0.3276
1976	10	10	30.0666	0.3326
1977	9	10	28.0179	0.3391
1978	9.0554	9	29.0689	0.3106
1979	10	9	28	0.3393
1980	9	9	29.0172	0.3102
1981	9	10	28	0.3393
1982	9	9.0554	30.0167	0.3008
1983	10	10	28	0.3571
1984	10	10.0499	29.0172	0.3455
1985	10	11	28	0.375
1986	11	11	30.0167	0.3665
1987	10	10	28	0.3571
1988	10	9.0554	30.0167	0.3174
1989	10	11	28	0.375
1990	10	10	31.0161	0.3224
1991	10	10.0499	28.0179	0.3578
1992	10	10	30	0.3333
1993	9	10	28.0179	0.3391
1994	10.0499	10	30	0.3342
1995	10	11.0454	28	0.3758
1996	10	10	30.0167	0.3331
1997	9.0554	9	28.0179	0.3222
1998	9	10	30	0.3167
1999	8	9	28.0179	0.3034
[truncated: 3,766 more rows]

## Sheet: eyeblink8-1
	A	B	C	EAR
	5	5.099	19.0263	0.2654
	5.099	5.099	18.1108	0.2815
	5	5	18.0278	0.2774
	5.099	5.099	18.1108	0.2815
	5	5	18.0278	0.2774
	5.099	5.099	17.1172	0.2979
	5	5	19.0263	0.2628
	5.099	5.099	17.1172	0.2979
	5	5	18.0278	0.2774
	5.099	5.099	17.1172	0.2979
	5	5.099	19.0263	0.2654
	5	6.0828	17.1172	0.3237
	5.099	5	18.1108	0.2788
	5	5.099	17.1172	0.295
	5.099	5	18.0278	0.2801
	5	5.099	17.0294	0.2965
	5	5	18.0278	0.2774
	5	5.099	17.1172	0.295
	5.099	5	18.0278	0.2801
	5	5.099	17.1172	0.295
	5	5	18.0278	0.2774
	5	5	17.1172	0.2921
	5.099	5	18.0278	0.2801
	5	5.099	17.1172	0.295
	5.099	5	18	0.2805
	5.099	5.099	17.1172	0.2979
	4	5	19.0263	0.2365
	5	5	17.0294	0.2936
	5	5	19.0263	0.2628
	5	5	17.1172	0.2921
	5	4	19.0263	0.2365
	5.099	5.099	17.0294	0.2994
	5	4.1231	19	0.2401
	5	5	18.1108	0.2761
	5	5	19.0263	0.2628
	5.099	5.099	17.1172	0.2979
	5	4	19	0.2368
	5.099	5.099	17.1172	0.2979
	5	5	19.0263	0.2628
	4.1231	4	17.0294	0.2385
	4	5	19.0263	0.2365
	4.1231	4.1231	17.0294	0.2421
	5.099	5	18.0278	0.2801
	5.099	5	17.1172	0.295
	5	4	18.0278	0.2496
	5.099	5	17.0294	0.2965
	5.099	5	18.0278	0.2801
	5.099	5	17.1172	0.295
	5	5	19.0263	0.2628
	5.099	5	17.1172	0.295
	5.099	5	18.0278	0.2801
	5.099	5	17.1172	0.295
	5.099	5	18.0278	0.2801
	5	5	17.0294	0.2936
	4	5	18.0278	0.2496
	5.099	5	17.0294	0.2965
	5	5	18.0278	0.2774
	5	5	18.0278	0.2774
	5	4	18.0278	0.2496
	5	5	18.0278	0.2774
	5.099	5	18.0278	0.2801
	4	5	17.0294	0.2642
	5.099	5	18.0278	0.2801
	5.099	5	16.1245	0.3132
	4.1231	5	18.0278	0.253
	4.1231	4	16.0312	0.2534
	5	5	19.0263	0.2628
	5.099	5.099	17.0294	0.2994
	4	5	19.0263	0.2365
	5.099	5.099	17.0294	0.2994
	5	5.099	19.0263	0.2654
	5.099	4.1231	17.0294	0.2708
	5	4	19	0.2368
	5.099	5.099	17.1172	0.2979
	5	5.099	19.0263	0.2654
	5.099	5.099	17.1172	0.2979
	5	5	19.0263	0.2628
	5.099	4.1231	17.1172	0.2694
	5	5.099	19.0263	0.2654
	6	6	17.0294	0.3523
	5	5	18.0278	0.2774
	5	5	17.1172	0.2921
	5.099	6	18.0278	0.3078
	5	5	17.0294	0.2936
	5	6	18.0278	0.3051
	5	5	17.1172	0.2921
	5	5	18.0278	0.2774
	5.099	5.099	16.1245	0.3162
	5	5	19	0.2632
	5.099	5.099	17.1172	0.2979
	5	5	19	0.2632
	5.099	5.099	18.1108	0.2815
	6.0828	5	18.0278	0.3074
	6	6.0828	17.1172	0.3529
	5	5	18	0.2778
	6.0828	5.099	18.1108	0.3087
	5	5	19	0.2632
	6.0828	6	18.1108	0.3336
	5	5.099	19	0.2658
	6	6.0828	17.1172	0.3529
	6	5	19.0263	0.2891
	6	6.0828	17.1172	0.3529
	6.0828	5	19	0.2917
	6.0828	6	18.1108	0.3336
	6	5	18.0278	0.3051
	6.0828	6	18.1108	0.3336
	6	5.099	18.0278	0.3078
	6.0828	6	17.1172	0.3529
	6	5	19.0263	0.2891
	6.0828	6.0828	18.1108	0.3359
	5	5	19	0.2632
	6.0828	6	18.1108	0.3336
	5	6	18.0278	0.3051
	6.0828	6.0828	18.1108	0.3359
	5	6	18.0278	0.3051
	5	5.099	17.1172	0.295
	5	6.0828	18.0278	0.3074
	5	5.099	18.1108	0.2788
	6	6	19.0263	0.3154
	5	5.099	18.1108	0.2788
	5	5.099	18.0278	0.2801
	6	5.099	18.1108	0.3064
	6	5.099	18.0278	0.3078
	5	6.0828	17.2627	0.321
	6	6.0828	18.0278	0.3351
	5.099	6.0828	17.2627	0.3239
	6	5	19.0263	0.2891
	5.099	6	17.1172	0.3242
	5	5	19	0.2632
	6	5.099	17.1172	0.3242
	5	6	19.0263	0.2891
	5	5.099	18.1108	0.2788
	6	6	19.0263	0.3154
	5	5.099	17.1172	0.295
	6	5	19.0263	0.2891
	5	6.0828	17.1172	0.3237
	5	6	19.0263	0.2891
	5.099	5	18.1108	0.2788
	5	6	19.0263	0.2891
	5	5.099	17.1172	0.295
	5	5	19.0263	0.2628
	6.0828	6.0828	17.1172	0.3554
	6	6	19.0263	0.3154
	6.0828	6.0828	17.2627	0.3524
	5.099	6	19.0263	0.2917
	6.0828	6.0828	18.2483	0.3333
	6.0828	6	19.0263	0.3175
	6.0828	6.0828	17.2627	0.3524
	6.0828	6	19.0263	0.3175
	6	6.0828	18.1108	0.3336
	6	6	19.0263	0.3154
	5.099	6.0828	18.1108	0.3087
	6.0828	6	19.0263	0.3175
	6.0828	6	18.2483	0.3311
	6.0828	6	19.0263	0.3175
	6.0828	6.0828	18.2483	0.3333
	6.0828	6	19.0263	0.3175
	6	6.0828	18.2483	0.3311
	6.0828	5	19	0.2917
	6.0828	6.0828	19.105	0.3184
	6	5	19.0263	0.2891
	5	5.099	19.105	0.2643
	6.0828	5	19.0263	0.2912
	5	6.0828	19.105	0.29
	6	5	19.0263	0.2891
	5	5.099	18.2483	0.2767
	6	5	19.0263	0.2891
	6	6.0828	18.1108	0.3336
	5	5	19.0263	0.2628
	6	5.099	19.105	0.2905
	5	5	19.0263	0.2628
	5	4.1231	19.105	0.2388
	5	5.099	19.0263	0.2654
	6	5.099	19.105	0.2905
	6	5.099	19.0263	0.2917
	6	6.0828	18.1108	0.3336
	5	5.099	19.0263	0.2654
	5	5.099	17.2627	0.2925
	5	5.099	19.0263	0.2654
	6.0828	5	18.1108	0.306
	5	5.099	19.0263	0.2654
	4	5	17.1172	0.2629
	5	5.099	19.0263	0.2654
	4	5	18.2483	0.2466
	6	5.099	19.0263	0.2917
	5	5.099	19.105	0.2643
	5	5.099	19.0263	0.2654
	6	5.099	19.105	0.2905
	5	5	19.0263	0.2628
	6.0828	5	18.2483	0.3037
	5	5	19.0263	0.2628
	6.0828	5	18.2483	0.3037
	5.099	5	19.0263	0.2654
	6.0828	5	18.1108	0.306
	5	5	19.0263	0.2628
	6	5.099	18.2483	0.3041
	6.0828	6	19.0263	0.3175
	5.099	5.099	18.2483	0.2794
	6.0828	6	19.0263	0.3175
	5	6.0828	18.2483	0.3037
	6.0828	6	19.0263	0.3175
	5	6.0828	17.2627	0.321
	5	6	19.0263	0.2891
	6.0828	5.099	18.1108	0.3087
	6	6.0828	19.0263	0.3175
	5.099	5	18.2483	0.2767
	5	5	19.0263	0.2628
	6.0828	5.099	18.1108	0.3087
	6	6	19.0263	0.3154
	6.0828	5	18.2483	0.3037
	6.0828	6.0828	19.0263	0.3197
	6.0828	6	18.2483	0.3311
	6.0828	6	18.0278	0.3351
	6.0828	6	18.2483	0.3311
	6.0828	6	18.0278	0.3351
	5.099	5	18.1108	0.2788
	6.0828	6	18.0278	0.3351
	6.0828	5	18.2483	0.3037
	5	5	19.0263	0.2628
	6.0828	5	18.1108	0.306
	5	5	19.0263	0.2628
	6	5.099	18.1108	0.3064
	6	5.099	19.105	0.2905
	6.0828	5.099	18.1108	0.3087
	5	5	19.105	0.2617
	6.0828	5	18.1108	0.306
	5.099	5.099	19.105	0.2669
	6.0828	5	18.1108	0.306
	5.099	5	18.0278	0.2801
	6.0828	5.099	18.1108	0.3087
	5.099	5	18.0278	0.2801
	6.0828	5	17.1172	0.3237
	6.0828	5	19.105	0.29
	6	5.099	18.1108	0.3064
	5	5.099	19.105	0.2643
	6	5.099	18.1108	0.3064
	6	6.0828	19.0263	0.3175
	6	6.0828	18.1108	0.3336
	6	6	19.0263	0.3154
	6	6.0828	18.1108	0.3336
	6	5	18.0278	0.3051
	6	6.0828	18.1108	0.3336
	6	5	19.0263	0.2891
	5	6.0828	18.1108	0.306
	6	6.0828	19.0263	0.3175
	6	6.0828	18.1108	0.3336
	6	6.0828	19.0263	0.3175
	6	6.0828	18.1108	0.3336
	5.099	5	18.1108	0.2788
	5	5	17.1172	0.2921
	5	5	19.0263	0.2628
	5.099	5.099	18.1108	0.2815
	5	5	18.0278	0.2774
	5.099	5.099	18.1108	0.2815
	4.1231	5	18.0278	0.253
	5.099	5.099	18.0278	0.2828
	5.099	6	18.0278	0.3078
	5.099	5.099	18.1108	0.2815
	5.099	5	18.0278	0.2801
	5	5.099	17.1172	0.295
	5.099	4	19.0263	0.2391
	5	5.099	18.1108	0.2788
	4.1231	5	18.0278	0.253
	5.099	5.099	18.1108	0.2815
	4	5.099	19.0263	0.2391
	5	5.099	18.1108	0.2788
	5	5.099	19.0263	0.2654
	5.099	5.099	17.1172	0.2979
	5	5.099	19.0263	0.2654
	5	5.099	18.1108	0.2788
	4.1231	5	19.0263	0.2397
	5	5.099	18.1108	0.2788
	4	5	19.0263	0.2365
	5.099	5.099	18.1108	0.2815
	5	5.099	19.0263	0.2654
	5	5.099	18.1108	0.2788
	5	5	19.0263	0.2628
	5	5.099	17.1172	0.295
	5	5	19.0263	0.2628
	5	5	17.1172	0.2921
	4	5	19.0263	0.2365
	5.099	5.099	18.1108	0.2815
	5.099	5	19.0263	0.2654
	5	5.099	18.1108	0.2788
	6	6.0828	18.0278	0.3351
	5.099	5	18.1108	0.2788
	6	6.0828	18.0278	0.3351
	6.0828	6	18.1108	0.3336
	6	6.0828	19.0263	0.3175
	6.0828	6.0828	18.1108	0.3359
	5	6	19.0263	0.2891
	5.099	6.0828	18.2483	0.3064
	5	6	19.0263	0.2891
	6.0828	6.0828	18.1108	0.3359
	5	5	19.105	0.2617
	6.0828	5.099	18.1108	0.3087
	5	6.0828	19.105	0.29
	5.099	5.099	18.1108	0.2815
	5	6	19.0263	0.2891
	5	6.0828	18.2483	0.3037
	5	6	19.0263	0.2891
	6	6.0828	18.2483	0.3311
	6	6	19.105	0.3141
	6	7.0711	18.2483	0.3581
	6	6	19.0263	0.3154
	6.0828	6.0828	19.105	0.3184
	6	6	19.0263	0.3154
	6	6.0828	18.1108	0.3336
	6	6	19.0263	0.3154
	6	6.0828	18.1108	0.3336
	6	6	19.0263	0.3154
	6.0828	6.0828	17.1172	0.3554
	6	6	19.105	0.3141
	6.0828	6.0828	18.1108	0.3359
	6	5	19.0263	0.2891
	6.0828	5.099	18.1108	0.3087
	6	6	19.0263	0.3154
	6.0828	6	18.1108	0.3336
	6	6	19.0263	0.3154
	6.0828	6.0828	19.105	0.3184
	6	6	19.0263	0.3154
	6.0828	6.0828	17.1172	0.3554
	6	6	19.0263	0.3154
	6	6.0828	17.1172	0.3529
	6	6	19.0263	0.3154
	6.0828	6.0828	17.1172	0.3554
	6	6	19.105	0.3141
	6.0828	6.0828	18.1108	0.3359
	6	6	19.0263	0.3154
	6.0828	6.0828	17.1172	0.3554
	6	5	19.105	0.2879
	6.0828	6.0828	18.1108	0.3359
	5	6	19.0263	0.2891
	5	6.0828	18.1108	0.306
	6.0828	6	19.0263	0.3175
	5	6.0828	18.1108	0.306
	5.099	5	19.105	0.2643
	5	5.099	18.1108	0.2788
	5.099	6	19.105	0.2905
	5.099	6.0828	18.1108	0.3087
	6.0828	6	19.0263	0.3175
	5	6.0828	17.1172	0.3237
	5.099	6	19.0263	0.2917
	5	6.0828	18.1108	0.306
	5.099	5	19.105	0.2643
	5	6.0828	19.105	0.29
	6.0828	6	19.0263	0.3175
	5	6.0828	18.2483	0.3037
	5.099	5	19.0263	0.2654
	5	5.099	18.1108	0.2788
	5.099	5.099	19.105	0.2669
	6	6.0828	18.1108	0.3336
	6.0828	6.0828	19.105	0.3184
	6	6.0828	18.1108	0.3336
	6.0828	6	19.0263	0.3175
	5	6.0828	18.1108	0.306
	6.0828	6.0828	18.0278	0.3374
	5.099	6	18.1108	0.3064
	6.0828	6.0828	18.0278	0.3374
	5.099	6	18.1108	0.3064
	6.0828	6.0828	19.0263	0.3197
	5	6	18.1108	0.3037
	6.0828	6.0828	19.0263	0.3197
	5	6.0828	18.2483	0.3037
	6.0828	6.0828	19.0263	0.3197
	5	6.0828	18.1108	0.306
	6.0828	6.0828	18.1108	0.3359
	5	6.0828	18.1108	0.306
	6.0828	6.0828	18.1108	0.3359
	5.099	6.0828	18.1108	0.3087
	6.0828	6.0828	19.0263	0.3197
	6	6.0828	18.1108	0.3336
	6.0828	6	19.0263	0.3175
	5	6.0828	18.1108	0.306
	6	6.0828	18.0278	0.3351
	6	6.0828	18.1108	0.3336
	6.0828	6	19.0263	0.3175
	5	6.0828	18.1108	0.306
	6.0828	6.0828	18.0278	0.3374
	5.099	6.0828	18.1108	0.3087
	6.0828	6	19.0263	0.3175
	6	6.0828	18.1108	0.3336
	6.0828	6	19.0263	0.3175
	5	6.0828	18.1108	0.306
	6.0828	6	19.0263	0.3175
	5	6.0828	17.1172	0.3237
	6.0828	6	19.0263	0.3175
	5	6.0828	18.1108	0.306
	6.0828	6.0828	19.0263	0.3197
	5	6.0828	17.1172	0.3237
	6.0828	6	19.0263	0.3175
	6.0828	6.0828	18.1108	0.3359
	6.0828	6.0828	19.0263	0.3197
	6.0828	6.0828	17.1172	0.3554
	6.0828	6.0828	18.0278	0.3374
	5	6.0828	17.1172	0.3237
	6.0828	6.0828	19.105	0.3184
	6.0828	6.0828	18.1108	0.3359
	6.0828	6	19.0263	0.3175
	6	6.0828	18.1108	0.3336
	6.0828	6	19.0263	0.3175
	5	6.0828	17.1172	0.3237
	5	5.099	19.105	0.2643
	6.0828	5	18.1108	0.306
	5	5	19.105	0.2617
	6	5.099	18.1108	0.3064
	5.099	5.099	19.105	0.2669
	5	5	17.1172	0.2921
	6.0828	5.099	19.105	0.2926
	5.099	5	17.1172	0.295
	6.0828	5	18.1108	0.306
	6.0828	5.099	17.1172	0.3266
	6	5	18.1108	0.3037
	6.0828	5.099	17.1172	0.3266
	5	5.099	19.105	0.2643
	6.0828	5.099	18.1108	0.3087
	5.099	5.099	19.0263	0.268
	5.099	6.0828	18.1108	0.3087
	5.099	5.099	19.105	0.2669
	5	5	18.1108	0.2761
	5.099	5	19.0263	0.2654
	5	5	18.2483	0.274
	5.099	5	19.0263	0.2654
	6	5	17.1172	0.3213
	5.099	5	19.0263	0.2654
	5	5	18.1108	0.2761
	5.099	5	19.0263	0.2654
	6	5	18.0278	0.3051
	5.099	5	19.0263	0.2654
	5	5	18.1108	0.2761
	5.099	5	18.0278	0.2801
	6	5	17.2627	0.3186
	6.0828	5	19.0263	0.2912
	6	5	18.1108	0.3037
	5.099	5	18.0278	0.2801
	5	5	17.1172	0.2921
	5.099	4	18.0278	0.2524
	5	5	17.0294	0.2936
	5.099	4	18.0278	0.2524
	6.0828	5	17.2627	0.321
	5.099	5	19.0263	0.2654
	5	5	17.1172	0.2921
	5.099	5	19.0263	0.2654
	5	5	17.1172	0.2921
	5.099	5	19.0263	0.2654
	5	5	17.1172	0.2921
	6.0828	5	19.0263	0.2912
	6.0828	5	17.1172	0.3237
	5	5	18.0278	0.2774
	6.0828	5	17.1172	0.3237
	6	5	18.0278	0.3051
	5.099	5	17.1172	0.295
	5.099	5	18.0278	0.2801
	5.099	5	17.1172	0.295
	5.099	5	18.0278	0.2801
	5.099	5	17.1172	0.295
	5	5.099	18.0278	0.2801
	5.099	5	17.1172	0.295
	6	5.099	19.0263	0.2917
	6.0828	5.099	17.1172	0.3266
	5	5.099	19.0263	0.2654
	5.099	6.0828	17.1172	0.3266
	5.099	5	19.105	0.2643
	5	5	17.1172	0.2921
	5	5	18.0278	0.2774
	5	5	17.1172	0.2921
	5.099	5	19.0263	0.2654
	5.099	4.1231	17.1172	0.2694
	5	5.099	19.0263	0.2654
	6	5	16.0312	0.3431
	5.099	5	19.0263	0.2654
	5.099	5.099	17.1172	0.2979
	6.0828	5	18.0278	0.3074
	6.0828	5	17.0294	0.3254
	6.0828	5	18.0278	0.3074
	6.0828	5.099	17.0294	0.3283
	6	5.099	19.0263	0.2917
	5	5	17.1172	0.2921
	5	4.1231	19.0263	0.2397
	5	5	16.1245	0.3101
	6	5.099	19.0263	0.2917
	5	5	17.1172	0.2921
	5	5.099	19.0263	0.2654
	5	5	17.1172	0.2921
	5	5.099	19.0263	0.2654
	5	5	16.1245	0.3101
	5	5.099	19.0263	0.2654
	6	5	17.1172	0.3213
	5	5.099	19.0263	0.2654
	5	5	17.1172	0.2921
	6	5.099	19.0263	0.2917
	5	5	17.0294	0.2936
	5	5.099	19.0263	0.2654
	5	5	17.1172	0.2921
	6	5.099	19.0263	0.2917
	5	5	17.1172	0.2921
	6	5.099	19.0263	0.2917
	5	5	17.0294	0.2936
	6	5.099	19.0263	0.2917
	6	5	16.0312	0.3431
	5	5.099	19.0263	0.2654
	5	5	16.0312	0.3119
	5.099	5	19.0263	0.2654
	6.0828	5.099	17.1172	0.3266
	6.0828	6	19.0263	0.3175
	5.099	6	17.1172	0.3242
	6	6	19.0263	0.3154
	6	6.0828	17.1172	0.3529
	6.0828	6.0828	18.0278	0.3374
	6.0828	6.0828	17.1172	0.3554
	6	6	19.0263	0.3154
	6	6.0828	18.1108	0.3336
	6	6	19.0263	0.3154
	6.0828	6	18.1108	0.3336
	6.0828	7	19.0263	0.3438
	7.0711	7	18.1108	0.3885
	6	6	19.0263	0.3154
	6	7.0711	18.2483	0.3581
	6	6.0828	19.0263	0.3175
	7.0711	7	18.2483	0.3855
	6	6	19.0263	0.3154
	7.0711	7.0711	18.1108	0.3904
	6	6	19.0263	0.3154
	6	6.0828	18.1108	0.3336
	6	6	19.0263	0.3154
	6	6.0828	18.1108	0.3336
	6	6	19.0263	0.3154
	6.0828	6	18.1108	0.3336
	6	6	19.0263	0.3154
	6.0828	6	18.1108	0.3336
	6	6	19	0.3158
	6.0828	6	18.1108	0.3336
	6	6	19	0.3158
	6.0828	6	18.1108	0.3336
	6	6	19	0.3158
	6.0828	6.0828	18.1108	0.3359
	6	7	19	0.3421
	6.0828	6.0828	18.1108	0.3359
	6	6	19	0.3158
	6.0828	6.0828	17.1172	0.3554
	6	6	19.0263	0.3154
	6.0828	6.0828	17.1172	0.3554
	6	6	19.0263	0.3154
	6	6.0828	18.1108	0.3336
	6	6	19.0263	0.3154
	6	6.0828	18.1108	0.3336
	6	5	19.0263	0.2891
	6	6.0828	18.1108	0.3336
	6	6	19.0263	0.3154
	6	6.0828	18.1108	0.3336
	6	6	19.0263	0.3154
	6.0828	6.0828	18.1108	0.3359
	6.0828	6	19.0263	0.3175
	5	6.0828	17.2627	0.321
	5	6	19.0263	0.2891
	6.0828	6	18.1108	0.3336
	5	6	19.0263	0.2891
	6.0828	5.099	18.1108	0.3087
	5	6	19.0263	0.2891
	6	6.0828	18.1108	0.3336
	6	6	19.105	0.3141
	6	6.0828	17.1172	0.3529
	6	6	19.0263	0.3154
	6	6.0828	18.2483	0.3311
	6	6	19.0263	0.3154
	7	6.0828	17.1172	0.3822
	6.0828	6.0828	19.0263	0.3197
	6.0828	6.0828	18.1108	0.3359
	6.0828	6.0828	18.0278	0.3374
	6.0828	6	18.2483	0.3311
	6.0828	6.0828	18.0278	0.3374
	6.0828	6.0828	18.2483	0.3333
	6.0828	6	19.0263	0.3175
	6.0828	6	18.2483	0.3311
	6	7.0711	19.0263	0.3435
	6.0828	6.0828	17.1172	0.3554
	6.0828	6.0828	18.0278	0.3374
	6.0828	6	17.1172	0.3529
	6	7.0711	19.0263	0.3435
	6.0828	6.0828	17.1172	0.3554
	6.0828	6.0828	19.0263	0.3197
	6	5.099	17.1172	0.3242
	6.0828	6	18.0278	0.3351
	6.0828	6.0828	17.2627	0.3524
	6	6	19.0263	0.3154
	6.0828	6.0828	17.1172	0.3554
	6	6.0828	18.0278	0.3351
	6	6.0828	17.1172	0.3529
	6	6.0828	18.0278	0.3351
	6.0828	6.0828	17.1172	0.3554
	6	6.0828	18.0278	0.3351
	5.099	5	18.2483	0.2767
	6.0828	6.0828	18.0278	0.3374
	6	6.0828	17.2627	0.35
	6.0828	6	18.0278	0.3351
	5	6	17.1172	0.3213
	6	6.0828	18.0278	0.3351
	5.099	5	18.1108	0.2788
	6	6.0828	18.0278	0.3351
	5	5.099	17.2627	0.2925
	6	5.099	19.0263	0.2917
	5	5.099	17.2627	0.2925
	6	6.0828	18.0278	0.3351
	5	6.0828	17.2627	0.321
	6	6.0828	18.0278	0.3351
	5	6.0828	17.2627	0.321
	5	6.0828	19.0263	0.2912
	5	5.099	17.1172	0.295
	5.099	6	18.0278	0.3078
	5.099	5.099	18.1108	0.2815
	6.0828	6	18.0278	0.3351
	5.099	6.0828	17.1172	0.3266
	5	6.0828	19.0263	0.2912
	5.099	5.099	17.1172	0.2979
	5	6.0828	19.0263	0.2912
	5.099	5	18.1108	0.2788
	5	6.0828	19.0263	0.2912
	5.099	5.099	18.1108	0.2815
	5.099	6	18.0278	0.3078
	5.099	5.099	17.1172	0.2979
	6.0828	6.0828	18.0278	0.3374
	5	5.099	17.1172	0.295
	5	5.099	19.0263	0.2654
	5	6.0828	17.2627	0.321
	6	5.099	19.0263	0.2917
	5	6.0828	17.2627	0.321
	6	5.099	19.0263	0.2917
	5	5.099	17.1172	0.295
	6	6	19.0263	0.3154
	5.099	5	18.1108	0.2788
	5	6	19	0.2895
	5.099	5.099	18.1108	0.2815
	5	6	19	0.2895
	5.099	5.099	18.1108	0.2815
	5.099	6	19.0263	0.2917
	5.099	5	18.1108	0.2788
	5	5.099	18.0278	0.2801
	6	5.099	19.0263	0.2917
	5	5.099	18.0278	0.2801
	5	5.099	18.1108	0.2788
	5	4	19	0.2368
	5	5.099	18.1108	0.2788
	5.099	4	19	0.2394
	5.099	5	18.1108	0.2788
	5	5	19.0263	0.2628
	5	5.099	17.1172	0.295
	5.099	5	19	0.2658
	5	5	18.1108	0.2761
	5	5	19	0.2632
	5	5.099	18.1108	0.2788
	5	5.099	18.0278	0.2801
	5.099	5	18.1108	0.2788
	5	5	18	0.2778
	5	5.099	18.1108	0.2788
	5	5.099	18.0278	0.2801
	5	5	18.1108	0.2761
	5	5.099	18.0278	0.2801
	5	5	18.1108	0.2761
	5	5	18.0278	0.2774
	5	5.099	18.1108	0.2788
	5	5	19.0263	0.2628
	5	5	19.105	0.2617
	5	5.099	18.0278	0.2801
	5.099	5.099	18.1108	0.2815
	5	5	18.0278	0.2774
	5.099	5	18.1108	0.2788
	5	5	18.0278	0.2774
	4	5.099	19.105	0.2381
	5	5	19.0263	0.2628
	5	5	18.1108	0.2761
	5	5	18.0278	0.2774
	5	5.099	18.1108	0.2788
	5	6	19.0263	0.2891
	6	5.099	18.1108	0.3064
	5	6	18.0278	0.3051
	5.099	5	18.1108	0.2788
	5.099	6	19	0.2921
	6.0828	5	18.1108	0.306
	5.099	5	18	0.2805
	6.0828	6	18.0278	0.3351
	6	5	18	0.3056
	6	6.0828	18.1108	0.3336
	6	6	18	0.3333
	6	6	18.1108	0.3313
	5	6.0828	18.0278	0.3074
	6	6	18.0278	0.3328
	6	6	18.0278	0.3328
	6	5.099	18.0278	0.3078
	6	5	18	0.3056
	5	5	18.0278	0.2774
	5	6	18.0278	0.3051
	5.099	5	18.0278	0.2801
	6	5	17	0.3235
	5	6	18	0.3056
	5	6	18	0.3056
	6	5.099	18.0278	0.3078
	5	5	18	0.2778
	5	6	18	0.3056
	5	6	18.0278	0.3051
	5	6	17	0.3235
	6.0828	6	17.0294	0.3548
	5	6	18	0.3056
	6	6.0828	18.0278	0.3351
	6	6	18	0.3333
	5	6	18.0278	0.3051
	6	5	18	0.3056
	5	5	18.0278	0.2774
	6	6	17	0.3529
	6	6	18	0.3333
	5	6	18	0.3056
	5	6.0828	18.0278	0.3074
	5	6	17	0.3235
	6	6.0828	18.0278	0.3351
	5.099	6	18	0.3083
	5	6	18.0278	0.3051
	5	6	18	0.3056
	5.099	6	18.0278	0.3078
	5	6	17	0.3235
	5	6.0828	18.0278	0.3074
	6	5	18.0278	0.3051
	6	6.0828	18.1108	0.3336
	6.0828	5	18	0.3079
	6.0828	6	17.1172	0.3529
	5.099	6	18	0.3083
	6.0828	6	18.1108	0.3336
	6	6	18	0.3333
	6.0828	6	18.0278	0.3351
	6	6	18	0.3333
	6.0828	6	18.0278	0.3351
	6	6.0828	18	0.3356
	6.0828	6	17.0294	0.3548
	6	5	18	0.3056
	6.0828	6	18.1108	0.3336
	6	6	18	0.3333
	6.0828	6.0828	18.0278	0.3374
	6	5	18	0.3056
	5	5.099	18.0278	0.2801
	5	6	18	0.3056
	5.099	5	18.0278	0.2801
	6	5	18.0278	0.3051
	5.099	5	17.0294	0.2965
	6	5	17	0.3235
	6	6.0828	18.0278	0.3351
	5	6	18	0.3056
	5.099	5	18.0278	0.2801
	6	5	18.0278	0.3051
	6.0828	6	19.0263	0.3175
	5	6	18	0.3056
	6	6.0828	18.0278	0.3351
	6	6	18	0.3333
	5.099	5	18.0278	0.2801
	5	5	18	0.2778
	5.099	5	18.0278	0.2801
	5	5.099	17	0.297
	5.099	6	18.0278	0.3078
	5	5	17.0294	0.2936
	4	4	18	0.2222
	4	4	17	0.2353
	3.1623	3	17	0.1812
	3	3	17	0.1765
	3	3	17	0.1765
	3	3	18.0278	0.1664
	3	4	17	0.2059
	3	3	18	0.1667
	4	4	18.0278	0.2219
	4.1231	4	18	0.2256
	5	4	18	0.25
	4	4	18.0278	0.2219
	5	5.099	18.0278	0.2801
	5	5	18	0.2778
	5	5.099	18.0278	0.2801
	5	5	18	0.2778
	5	5	18.0278	0.2774
	5	5	18	0.2778
	5	5	18.0278	0.2774
	5	5	18	0.2778
	5.099	5	18.0278	0.2801
	5	5	18	0.2778
	5	5	18.0278	0.2774
	5	5	18	0.2778
	5	5	18	0.2778
	5	5	18	0.2778
	5	5	18	0.2778
	5.099	6	18.0278	0.3078
	6	5.099	18.0278	0.3078
	6	6	18.0278	0.3328
	6.0828	5	19	0.2917
	6	6.0828	18.0278	0.3351
	6.0828	5	19.0263	0.2912
	6	6.0828	19.0263	0.3175
	5	5.099	18.0278	0.2801
	5.099	6	18.0278	0.3078
	5	5	18.0278	0.2774
	5.099	5	18.0278	0.2801
	5.099	6	18.0278	0.3078
	5.099	5	18.0278	0.2801
	6	5	19.0263	0.2891
	6	6.0828	19.105	0.3162
	6	5	18	0.3056
	6	6.0828	18.1108	0.3336
	5	5.099	18.0278	0.2801
	5	6.0828	18.1108	0.306
	5.099	5	18.0278	0.2801
	5	6	18.1108	0.3037
	6.0828	6	18.0278	0.3351
	5	5	18.0278	0.2774
	5	6	19.0263	0.2891
	5	5	17.0294	0.2936
	5	6.0828	18.0278	0.3074
	5.099	5	18.0278	0.2801
	5	5.099	19.0263	0.2654
	5.099	5	18.0278	0.2801
	5	5.099	18.0278	0.2801
	5.099	5	18.0278	0.2801
	5.099	6.0828	18.0278	0.3101
	5	5.099	18.0278	0.2801
	5.099	6	18.0278	0.3078
	5	5.099	17.0294	0.2965
	6.0828	6	18.0278	0.3351
	5	5	17.0294	0.2936
	6	6	18.0278	0.3328
	5	5	17.0294	0.2936
	6	6	18.0278	0.3328
	5.099	5	18.0278	0.2801
	6	5	19.0263	0.2891
	5.099	5	18.0278	0.2801
	6	5.099	19.0263	0.2917
	5	5.099	18.0278	0.2801
	6	6.0828	19.0263	0.3175
	5.099	5	18.0278	0.2801
	5	5	19	0.2632
	5.099	5	18.0278	0.2801
	5	5	19.0263	0.2628
	5	5	18.0278	0.2774
	5	5	18.0278	0.2774
	5.099	5	17.0294	0.2965
	5	6	19.0263	0.2891
	6.0828	6	18.1108	0.3336
	5	5	19	0.2632
	5	5	17.0294	0.2936
	5	5	19.0263	0.2628
	6.0828	5	18.0278	0.3074
	5	6	19.0263	0.2891
	6.0828	6	17.1172	0.3529
	5	5.099	19	0.2658
	5.099	5	18.1108	0.2788
	5	5.099	18	0.2805
	5.099	5	18.1108	0.2788
	6	5.099	19	0.2921
	6.0828	5	17.1172	0.3237
	5	5.099	18	0.2805
	6.0828	5	18.1108	0.306
	5	5	19	0.2632
	6.0828	6	17.1172	0.3529
	5	4.1231	18	0.2534
	5.099	5	17.1172	0.295
	5	5	19	0.2632
	5.099	5	18.1108	0.2788
	5	5	19	0.2632
	6.0828	6	18.1108	0.3336
	5	5	19	0.2632
	5.099	5	18.1108	0.2788
	5	5	18	0.2778
	5.099	6	18.0278	0.3078
	5	6	19.0263	0.2891
	5	5	17.1172	0.2921
	5	5	19	0.2632
	6.0828	5	18.1108	0.306
	5	6	19.0263	0.2891
	5.099	5.099	18.1108	0.2815
	6	6	19.0263	0.3154
	5.099	6	18.0278	0.3078
	6	5	19	0.2895
	6.0828	6	18.0278	0.3351
	6	5	19	0.2895
	6.0828	6	18.0278	0.3351
	5	5.099	18	0.2805
	6	6	18.1108	0.3313
	6	5	19	0.2895
	5.099	6	17.0294	0.3259
	5	6.0828	18.0278	0.3074
	5.099	5	18.0278	0.2801
	5	5.099	19.0263	0.2654
	5.099	5	17.0294	0.2965
	6	6	19.0263	0.3154
	5.099	5	18.0278	0.2801
	6	5	19.0263	0.2891
	5.099	5	18.0278	0.2801
	5	5	19	0.2632
	6.0828	6	18.0278	0.3351
	5	5.099	19	0.2658
	6.0828	5	18.0278	0.3074
	5	5.099	18	0.2805
	5.099	4	18.0278	0.2524
	6	5	19	0.2895
	6.0828	6	18.1108	0.3336
	6	5	19.0263	0.2891
	6.0828	6	18.0278	0.3351
	6	5	19.0263	0.2891
	6	6.0828	18.1108	0.3336
	6	5	19.0263	0.2891
	6	6.0828	18.1108	0.3336
	6	5	19.0263	0.2891
	6.0828	6	18.1108	0.3336
	6	5	19.0263	0.2891
	6.0828	6	18.1108	0.3336
	6	5	19.0263	0.2891
	6.0828	6	18.1108	0.3336
	6	5	19.0263	0.2891
	6.0828	6	18.0278	0.3351
	6	5	19.0263	0.2891
	6.0828	6	18.1108	0.3336
	6	5	19.0263	0.2891
	6.0828	6	18.0278	0.3351
	6	5	19.0263	0.2891
	6	6	17.0294	0.3523
	6	6	19.0263	0.3154
	6.0828	6	18.1108	0.3336
	5	6	19.0263	0.2891
	5.099	5	17.0294	0.2965
	6	6	19.0263	0.3154
	5.099	5	18.0278	0.2801
	5.099	6	19.0263	0.2917
	5.099	5	18.0278	0.2801
	6.0828	6	19.0263	0.3175
	6.0828	6.0828	17.1172	0.3554
	5	6	19.0263	0.2891
	5.099	5	18.0278	0.2801
	5.099	6	19.0263	0.2917
	5.099	5.099	17.1172	0.2979
	6	6	19.0263	0.3154
	5.099	6.0828	17.0294	0.3283
	5.099	6	18.0278	0.3078
	6.0828	6.0828	18.0278	0.3374
	5.099	6	18.0278	0.3078
	5	5.099	18.1108	0.2788
	6	6.0828	19.0263	0.3175
	6	6.0828	18.0278	0.3351
	5	6	19.0263	0.2891
	5.099	5.099	18.1108	0.2815
	5	6	18.0278	0.3051
	5.099	5	18.1108	0.2788
	5	6	19.0263	0.2891
	5.099	5	18.1108	0.2788
	4.1231	5	18	0.2534
	4	4	17.0294	0.2349
	3	2	18	0.1389
	3	3.1623	17.0294	0.1809
	3.1623	2.2361	18.0278	0.1497
	3	3	17	0.1765
	3	3	18.0278	0.1664
	3.1623	2	17.0294	0.1516
	4	3	18	0.1944
	4	4	17.0294	0.2349
	4	4	18	0.2222
	4.1231	4.1231	18.0278	0.2287
	4	4	18	0.2222
	5.099	5.099	18.1108	0.2815
	5	4	18	0.25
	5.099	5	18.1108	0.2788
	5	5	18	0.2778
	5.099	5	18.0278	0.2801
	5	5	18.0278	0.2774
	5	5.099	17.0294	0.2965
	6	5	18.0278	0.3051
	5	4.1231	18.0278	0.253
	5	5	18.0278	0.2774
	5.099	4.1231	18.0278	0.2558
	5	4	18.0278	0.2496
	5	5	17.1172	0.2921
	5	5	18.0278	0.2774
	5.099	4.1231	18.0278	0.2558
	5	5	18.0278	0.2774
	4.1231	4.1231	18.0278	0.2287
	5	5	18.0278	0.2774
	5.099	6.0828	18.0278	0.3101
	5	5	18.0278	0.2774
	6.0828	5.099	18.0278	0.3101
	5	5.099	18.0278	0.2801
	5.099	6.0828	18.0278	0.3101
	6	5.099	18.0278	0.3078
	5	5.099	17.0294	0.2965
	5	5	19.0263	0.2628
	5.099	5	18.1108	0.2788
	5	5	18.0278	0.2774
	5	5.099	18.0278	0.2801
	5	5	18	0.2778
	5	5.099	18.0278	0.2801
	5	5	18	0.2778
	6	5.099	17.1172	0.3242
	5	5	18	0.2778
	6	5.099	17.0294	0.3259
	5	5	18	0.2778
	5	5.099	17.1172	0.295
	5	5	18.0278	0.2774
	5.099	5	18.0278	0.2801
	5	5	18	0.2778
	5.099	5	18.0278	0.2801
	5	5.099	18	0.2805
	5.099	5.099	17.1172	0.2979
	5	5	19	0.2632
	5	5.099	18.1108	0.2788
	5	5	18	0.2778
	5.099	5	18.0278	0.2801
	5	5	18	0.2778
	5.099	5.099	18.1108	0.2815
	5	5.099	18.0278	0.2801
	5	5.099	18.1108	0.2788
	5	5	18	0.2778
	5.099	5.099	17.1172	0.2979
	5	5	18	0.2778
	5	5.099	18.1108	0.2788
	5	5	18	0.2778
	5	5.099	18.1108	0.2788
	5.099	5	18	0.2805
	5	5	17.1172	0.2921
	5	5.099	19	0.2658
	5.099	5	18.1108	0.2788
	5	5	19	0.2632
	5.099	5.099	18.1108	0.2815
	5	5.099	19	0.2658
	5.099	5.099	18.1108	0.2815
	5	5.099	19.0263	0.2654
	5.099	5.099	18.1108	0.2815
	5	5.099	19.0263	0.2654
	5.099	5	18.1108	0.2788
	5	5	19.0263	0.2628
	5	5	17.1172	0.2921
	5	5	19.0263	0.2628
	5.099	5.099	18.1108	0.2815
	5	5.099	19.105	0.2643
	5.099	5.099	18.1108	0.2815
	5	5	19.0263	0.2628
	5.099	5	18.1108	0.2788
	5	5	19.0263	0.2628
	5.099	5	18.1108	0.2788
	5	5	19.0263	0.2628
	5.099	5.099	18.1108	0.2815
	5	5.099	18.0278	0.2801
	4.1231	4.1231	18.1108	0.2277
	5	5	19.0263	0.2628
	5.099	5.099	18.1108	0.2815
	5	5	19.0263	0.2628
	4.1231	4.1231	18.1108	0.2277
	5	5.099	19.0263	0.2654
	4.1231	4.1231	18.1108	0.2277
	5.099	5	18.0278	0.2801
	4.1231	4.1231	18.1108	0.2277
	4	4	19.0263	0.2102
	4.1231	4.1231	18.1108	0.2277
	5.099	5	19.0263	0.2654
	4.1231	5.099	18.1108	0.2546
	4	4.1231	19.0263	0.2135
	4.1231	4.1231	18.1108	0.2277
	4.1231	5	18.0278	0.253
	4.1231	4.1231	18.1108	0.2277
	4.1231	5	18.0278	0.253
	4.1231	5	18.1108	0.2519
	4	4	18.0278	0.2219
	4	4	18.1108	0.2209
	4	4	18.0278	0.2219
	4	5	18.1108	0.2485
	4	4.1231	18.0278	0.2253
	4	4	18.1108	0.2209
	5.099	5	18.0278	0.2801
	4	5	17.1172	0.2629
	5	5	18.0278	0.2774
	4	4.1231	17.1172	0.2373
	5	5.099	18.0278	0.2801
	4	5.099	18.1108	0.2512
	5	5	18.0278	0.2774
	4	5.099	17.1172	0.2658
	5	5	18.0278	0.2774
	4	4.1231	17.1172	0.2373
	5	5.099	18.0278	0.2801
	4	5.099	18.1108	0.2512
	4	5	18.0278	0.2496
	5	4.1231	18.1108	0.2519
	4	4	18.0278	0.2219
	4	4.1231	18.2483	0.2226
	4	5	18.0278	0.2496
	4	4.1231	17.1172	0.2373
	5	5.099	18.0278	0.2801
	4	4	18.2483	0.2192
	5	5.099	18.0278	0.2801
	5	4.1231	17.1172	0.2665
	5	5.099	19.0263	0.2654
	4.1231	5.099	18.1108	0.2546
	5	5.099	18.0278	0.2801
	4	4.1231	17.1172	0.2373
	5	5.099	18.0278	0.2801
	5	4.1231	17.1172	0.2665
	4	5.099	19.0263	0.2391
	5.099	4.1231	18.1108	0.2546
	5	5.099	19.0263	0.2654
	5	4.1231	18.1108	0.2519
	5	5.099	18.0278	0.2801
	5	4.1231	18.2483	0.25
	5	5.099	19.0263	0.2654
	4.1231	5.099	18.1108	0.2546
	5	5.099	18.0278	0.2801
	5	4.1231	18.2483	0.25
	5	5.099	18.0278	0.2801
	4.1231	5.099	18.1108	0.2546
	5	5.099	19	0.2658
	5.099	5.099	18.1108	0.2815
	5	5.099	18.0278	0.2801
	4.1231	4	18.1108	0.2243
	5	5	18.0278	0.2774
	4.1231	5.099	18.1108	0.2546
	5	5.099	18.0278	0.2801
	5.099	5.099	18.1108	0.2815
	5	5.099	18.0278	0.2801
	5	5.099	18.1108	0.2788
	5	4.1231	19	0.2401
	4.1231	5.099	18.1108	0.2546
	5	4	18	0.25
	4	5.099	17.1172	0.2658
	5	4.1231	19	0.2401
	5.099	5.099	17.1172	0.2979
	5	4.1231	19	0.2401
	5	5.099	18.1108	0.2788
	5	5.099	19	0.2658
	5	5.099	18.1108	0.2788
	5	5.099	19.0263	0.2654
	5.099	5.099	18.1108	0.2815
	5	4.1231	19	0.2401
	5	5.099	18.1108	0.2788
	5	4.1231	18.0278	0.253
	5.099	5.099	18.1108	0.2815
	5	5.099	18	0.2805
	5	5.099	17.1172	0.295
	5	4.1231	19.0263	0.2397
	5.099	5.099	18.1108	0.2815
	5	5.099	19	0.2658
	5.099	5.099	18.1108	0.2815
	5	4.1231	19	0.2401
	5	5.099	17.1172	0.295
	5	5.099	19.0263	0.2654
	5	5.099	18.1108	0.2788
	5	4	19	0.2368
	5	5.099	18.1108	0.2788
	4	4	19	0.2105
	5.099	5	18.1108	0.2788
	5	4.1231	19	0.2401
	5	5.099	18.1108	0.2788
	5	4.1231	19.0263	0.2397
	5	5.099	18.1108	0.2788
	5	4	18.0278	0.2496
	5	5.099	18.1108	0.2788
	5	4	18	0.25
	5.099	5.099	18.1108	0.2815
	5	4	18	0.25
	5.099	5.099	17.1172	0.2979
	5.099	4	19.0263	0.2391
	5.099	5	18.1108	0.2788
	5.099	5	19	0.2658
	5.099	5.099	18.1108	0.2815
	5	5	19	0.2632
	5.099	5	18.1108	0.2788
	5	5	19	0.2632
	5.099	5.099	18.1108	0.2815
	5	5	19.0263	0.2628
	5.099	5	18.1108	0.2788
	5	5	19	0.2632
	5.099	5	18.1108	0.2788
	5.099	5	19	0.2658
	5.099	5	18.1108	0.2788
	5	5	19	0.2632
	5.099	5	18.1108	0.2788
	5.099	5	19	0.2658
	5.099	5	18.1108	0.2788
	5	4	19	0.2368
	5.099	5.099	18.1108	0.2815
	5	5	19	0.2632
	5.099	5.099	18.1108	0.2815
	5	5.099	19	0.2658
	5.099	5	18.1108	0.2788
	5	5.099	19	0.2658
	5.099	5.099	18.1108	0.2815
	5	5.099	19	0.2658
	5	5.099	18.1108	0.2788
	5	5.099	18.0278	0.2801
	5	5.099	18.1108	0.2788
	5	5	18.0278	0.2774
	5.099	5.099	18.1108	0.2815
	5	5.099	19	0.2658
	5.099	5	18.1108	0.2788
	5	4.1231	19	0.2401
	5.099	5.099	18.1108	0.2815
	5	5	19	0.2632
	5.099	5.099	18.1108	0.2815
	5	5.099	19	0.2658
	5.099	5.099	18.1108	0.2815
	5	5.099	19	0.2658
	5.099	5.099	18.1108	0.2815
	5	5.099	19.0263	0.2654
	5.099	5.099	18.1108	0.2815
	5	5	18.0278	0.2774
	5.099	5	18.1108	0.2788
	5	5	18.0278	0.2774
	5.099	5	18.1108	0.2788
	5	4	18	0.25
	5.099	5	18.1108	0.2788
	5	4	19	0.2368
	5.099	5	18.1108	0.2788
	5	5	18.0278	0.2774
	5.099	5	18.1108	0.2788
	5.099	5	18.0278	0.2801
	5.099	5	18.1108	0.2788
	5	5	19.0263	0.2628
	5.099	5.099	18.1108	0.2815
	5	5	18	0.2778
	5.099	5.099	18.1108	0.2815
	5	4	19	0.2368
	5.099	5.099	18.1108	0.2815
	5	5	19.0263	0.2628
	5.099	5.099	18.1108	0.2815
	5	5	19.0263	0.2628
	5.099	5.099	18.1108	0.2815
	5.099	4	19.0263	0.2391
	5.099	5	18.1108	0.2788
	5.099	4	18.0278	0.2524
	5.099	5	18.1108	0.2788
	5	5	19.0263	0.2628
	5.099	5	18.1108	0.2788
	5.099	5	19.0263	0.2654
	5.099	5	18.1108	0.2788
	5.099	5	18.0278	0.2801
	5.099	5.099	18.1108	0.2815
	5.099	5	19	0.2658
	5.099	5.099	18.1108	0.2815
	5	4	19	0.2368
	5.099	5.099	18.1108	0.2815
	4	5	18.0278	0.2496
	4	4	17.1172	0.2337
	4.1231	5	18.0278	0.253
	4	4	17.0294	0.2349
	5.099	5	18.0278	0.2801
	5	5	17.0294	0.2936
	4.1231	4	18	0.2256
	4	4	17.1172	0.2337
	5	5	19.0263	0.2628
	5	5	17.1172	0.2921
	5.099	4	18	0.2528
	5	5	17.1172	0.2921
	5.099	4	18	0.2528
	5	4	17.1172	0.2629
	5	5	18	0.2778
	5	5	17.1172	0.2921
	5	5	18.0278	0.2774
	6	5.099	17.0294	0.3259
	5.099	4	18	0.2528
	5	4	17.1172	0.2629
	5.099	4	18.0278	0.2524
	4	4	17.0294	0.2349
	5	4	18.0278	0.2496
	4	4	17.0294	0.2349
	5	5	18	0.2778
	5	5	17.1172	0.2921
	5	5	18.0278	0.2774
	5.099	5.099	18.1108	0.2815
	5	5	18	0.2778
	5	5.099	17.1172	0.295
	5	5.099	19.0263	0.2654
	5	5.099	17.1172	0.295
	5	5	18.0278	0.2774
	5	5.099	17.1172	0.295
	5	5	18.0278	0.2774
	5	5.099	17.1172	0.295
	6	5.099	19.0263	0.2917
	6	5.099	17.1172	0.3242
	5	5	19.0263	0.2628
	5.099	5	18.1108	0.2788
	5	5	19	0.2632
	5.099	5	18.1108	0.2788
	5	5	19	0.2632
	5.099	5	18.1108	0.2788
	5	5	19	0.2632
	5.099	5	18.1108	0.2788
	5	6	19.0263	0.2891
	6.0828	6.0828	18.0278	0.3374
	5	6.0828	19.0263	0.2912
	6	6.0828	18.0278	0.3351
	5	6.0828	19.0263	0.2912
	6.0828	6.0828	18.1108	0.3359
	5.099	5	18	0.2805
	5	5	17.1172	0.2921
	5	5	18	0.2778
	5	5.099	17.1172	0.295
	5.099	5	18.0278	0.2801
	5	5.099	17.1172	0.295
	5.099	5	18	0.2805
	5	5	17.1172	0.2921
	5.099	5	18.0278	0.2801
	5	5	17.0294	0.2936
	5.099	5	18.0278	0.2801
	5.099	5	17.1172	0.295
	5.099	5	18.0278	0.2801
	5.099	5	18.1108	0.2788
	6.0828	5	18.0278	0.3074
	5.099	5.099	18.1108	0.2815
	5	6	19.0263	0.2891
	6.0828	6	18.0278	0.3351
	5.099	5	19.0263	0.2654
	5.099	5	18.1108	0.2788
	6.0828	6	18.0278	0.3351
	6.0828	6	18.1108	0.3336
	6.0828	6	19.0263	0.3175
	6.0828	6	18.1108	0.3336
	6.0828	6	18.0278	0.3351
	6.0828	6	18.1108	0.3336
	6.0828	6	18.0278	0.3351
	6.0828	6	18.1108	0.3336
	6.0828	6	18.1108	0.3336
	6.0828	6	18.1108	0.3336
	6.0828	6	18.1108	0.3336
	6.0828	6	18.1108	0.3336
	6.0828	6	18.0278	0.3351
	6.0828	6.0828	18.1108	0.3359
	6.0828	6	19.105	0.3162
	6.0828	6	18.1108	0.3336
	6.0828	6	19.0263	0.3175
	6.0828	6	18.1108	0.3336
	6.0828	6	19.0263	0.3175
	6.0828	6	18.1108	0.3336
	6.0828	6	18.1108	0.3336
	6.0828	6.0828	17.1172	0.3554
	6.0828	6	19.0263	0.3175
	6.0828	6.0828	18.1108	0.3359
	6.0828	6	19.0263	0.3175
	6.0828	6.0828	17.1172	0.3554
	6.0828	6	19.0263	0.3175
	6.0828	6	18.1108	0.3336
	6.0828	6	19.0263	0.3175
	6.0828	6	18.1108	0.3336
	6	6	19.0263	0.3154
	6.0828	6	18.1108	0.3336
	6	6.0828	19.0263	0.3175
	6	6.0828	18.1108	0.3336
	6	7.0711	19.0263	0.3435
	7	6.0828	18.1108	0.3612
	6	6	19.0263	0.3154
	6.0828	7	18.1108	0.3612
	6	6	19.0263	0.3154
	6	7.0711	18.1108	0.3609
	6	6.0828	19.0263	0.3175
	7	7.0711	18.1108	0.3885
	6	6	19.0263	0.3154
	6	7	18.1108	0.3589
	7	6	19.0263	0.3416
	7	6.0828	18.1108	0.3612
	6	6	19.0263	0.3154
	6.0828	6	18.1108	0.3336
	6	6.0828	19.0263	0.3175
	6.0828	6.0828	18.1108	0.3359
	6	6	19.0263	0.3154
	6	6.0828	18.1108	0.3336
	6	6	19.0263	0.3154
	6	6.0828	18.1108	0.3336
	6	6	19.0263	0.3154
	6.0828	6.0828	18.1108	0.3359
	6	6	19.0263	0.3154
	6.0828	6	18.1108	0.3336
	6.0828	6	18.0278	0.3351
	6.0828	6	18.1108	0.3336
	6	6	19.0263	0.3154
	6.0828	6	18.1108	0.3336
	6	5	19.0263	0.2891
	6.0828	5	17.0294	0.3254
	6	6.0828	19.0263	0.3175
	6	6.0828	18.1108	0.3336
	6	6	19.0263	0.3154
	6	6.0828	18.1108	0.3336
	6	6.0828	19.105	0.3162
	6	6.0828	18.1108	0.3336
	6	6	19.0263	0.3154
	6.0828	5.099	18.1108	0.3087
	6	6	19.0263	0.3154
	6.0828	6.0828	18.1108	0.3359
	6.0828	6	18.0278	0.3351
	6.0828	6	18.1108	0.3336
	6	6	18.0278	0.3328
	6.0828	6	17.1172	0.3529
	6	6	18.0278	0.3328
	6.0828	6	17.1172	0.3529
	6	6	18.0278	0.3328
	6.0828	6	17.1172	0.3529
	6	5	19.0263	0.2891
	6.0828	5	17.1172	0.3237
	5	5	18.0278	0.2774
	6.0828	5	17.1172	0.3237
	6	6	19.0263	0.3154
	7.0711	6	18.1108	0.3609
	6	5	19.0263	0.2891
	6.0828	6	18.1108	0.3336
	6	6	19.0263	0.3154
	6.0828	5	17.2627	0.321
	6	5	18.0278	0.3051
	6.0828	5	17.1172	0.3237
	6	6	18.0278	0.3328
	7.0711	6	18.1108	0.3609
	6.0828	5	18.0278	0.3074
	6.0828	5	17.1172	0.3237
	5	5	18.0278	0.2774
	6.0828	5	17.1172	0.3237
	5	6	18.0278	0.3051
	6.0828	6	17.1172	0.3529
	6	5	18.0278	0.3051
	6.0828	6	17.1172	0.3529
	6	5	18.0278	0.3051
	5.099	6	17.1172	0.3242
	5	6.0828	18.0278	0.3074
	6.0828	6.0828	17.1172	0.3554
	5	6	18.0278	0.3051
	5.099	6	17.1172	0.3242
	6	6	18.0278	0.3328
	6.0828	6	17.1172	0.3529
	6	6	19.0263	0.3154
	6.0828	6	18.1108	0.3336
	6	6	19.0263	0.3154
	6	6.0828	18.1108	0.3336
	6	6	19.0263	0.3154
	6	6.0828	18.1108	0.3336
	6	6	19.0263	0.3154
	6	6.0828	18.1108	0.3336
	6	6	18.0278	0.3328
	6.0828	6.0828	18.1108	0.3359
	6	6	19.0263	0.3154
	6.0828	6	18.1108	0.3336
	5.099	6	18.0278	0.3078
	6	6	17.1172	0.3505
	5.099	6	18.0278	0.3078
	6	6.0828	17.1172	0.3529
	6	5.099	19.0263	0.2917
	6	6.0828	18.1108	0.3336
	6	6.0828	19.0263	0.3175
	6	6.0828	17.1172	0.3529
	5	5.099	19	0.2658
	5	5.099	18.1108	0.2788
	6	5.099	18	0.3083
	5	5.099	17.1172	0.295
	6.0828	5	18	0.3079
	6.0828	5	17.1172	0.3237
	6	6	18.0278	0.3328
	6.0828	6	17.1172	0.3529
	6	6	18.0278	0.3328
	6	5.099	18.1108	0.3064
	6	6.0828	19.0263	0.3175
	6	6.0828	18.1108	0.3336
	6	6.0828	19.0263	0.3175
	6	6.0828	17.1172	0.3529
	6	6.0828	19.0263	0.3175
	6	5.099	17.1172	0.3242
	6.0828	5.099	18.0278	0.3101
	6	5.099	18.1108	0.3064
	5.099	5.099	18.0278	0.2828
	5	5	17.1172	0.2921
	5.099	5	18.0278	0.2801
	5	5	17.1172	0.2921
	5.099	5	18.0278	0.2801
	5	6	17.1172	0.3213
	5.099	5	18.0278	0.2801
	5	5	17.1172	0.2921
	5.099	5	18.0278	0.2801
	5	5	17.1172	0.2921
	6.0828	5	18.0278	0.3074
	6.0828	6	17.1172	0.3529
	5	5	18.0278	0.2774
	5	5	17.2627	0.2896
	5.099	6	18.0278	0.3078
	6	6	17.1172	0.3505
	5	6	18.0278	0.3051
	6.0828	6	17.1172	0.3529
	6	6	18.0278	0.3328
	5	6	17.1172	0.3213
	6	5	18.0278	0.3051
	6.0828	6	17.1172	0.3529
	6	6	18.0278	0.3328
	5.099	6	17.1172	0.3242
	6	6.0828	19.0263	0.3175
	5.099	5	17.1172	0.295
	6	6.0828	19.0263	0.3175
	5.099	5	17.1172	0.295
	6.0828	6.0828	19.0263	0.3197
	5	6.0828	17.1172	0.3237
	5	5.099	19.0263	0.2654
	6	6.0828	18.1108	0.3336
	6	6	19.0263	0.3154
	6.0828	5	18.2483	0.3037
	6	6	19.105	0.3141
	6.0828	6	17.1172	0.3529
	6	6.0828	19.0263	0.3175
	6.0828	6	17.1172	0.3529
	6	6.0828	19.0263	0.3175
	6.0828	6.0828	18.1108	0.3359
	6	6.0828	19.0263	0.3175
	6.0828	6.0828	18.1108	0.3359
	6	6	19.0263	0.3154
	6	6.0828	18.1108	0.3336
	6.0828	5	19.105	0.29
	5	5.099	18.1108	0.2788
	5.099	5	18.0278	0.2801
	5	5	18.1108	0.2761
	5.099	4	18.0278	0.2524
	5	5	18.1108	0.2761
	5	5.099	18.0278	0.2801
	5	5	17.1172	0.2921
	5	5	18.0278	0.2774
	6	4	17.1172	0.2921
	5.099	5	18.0278	0.2801
	5	5	18.0278	0.2774
	5.099	5	19.0263	0.2654
	5	5	18.1108	0.2761
	5	5	19.0263	0.2628
	5	5.099	18.0278	0.2801
	5	5.099	19.0263	0.2654
	5.099	5.099	17.0294	0.2994
	5	5	19.0263	0.2628
	6.0828	6.0828	17.1172	0.3554
	5	5	19.0263	0.2628
	6.0828	6	17.1172	0.3529
	5	5	19.0263	0.2628
	5.099	5	17.0294	0.2965
	5	5	18.0278	0.2774
	5.099	5	17.1172	0.295
	5	5.099	19.0263	0.2654
	6	6	17.1172	0.3505
	5	5	19.0263	0.2628
	5.099	5.099	18.1108	0.2815
	5	5	19.0263	0.2628
	5.099	6.0828	18.1108	0.3087
	5	5	19.0263	0.2628
	5.099	6.0828	18.1108	0.3087
	5	5	19.0263	0.2628
	5.099	5.099	18.1108	0.2815
	5	5	19.0263	0.2628
	5.099	6.0828	18.1108	0.3087
	3	3	18.0278	0.1664
	4	4	17.0294	0.2349
	3.1623	2	17	0.1518
	3	3	16.0312	0.1871
	3	3	18.0278	0.1664
	3	3	17.0294	0.1762
	4.1231	3.1623	18.0278	0.2021
	3	3	17.0294	0.1762
	4.1231	4	18	0.2256
	4	4	18.0278	0.2219
	5	5	17.0294	0.2936
	5.099	5	17.1172	0.295
	5	6.0828	18.0278	0.3074
	5	5	17.0294	0.2936
	6	6	19.0263	0.3154
	6.0828	6.0828	17.1172	0.3554
	6	6	18.0278	0.3328
	6.0828	6	17.1172	0.3529
	5	5	19.0263	0.2628
	5.099	5	17.0294	0.2965
	5	5	18.0278	0.2774
	6.0828	6.0828	18.0278	0.3374
	5	5	18.0278	0.2774
	6.0828	5	17.0294	0.3254
	5	5	18	0.2778
	5.099	5	17.0294	0.2965
	5	5	18	0.2778
	6.0828	6.0828	17.0294	0.3572
	5	5	19.0263	0.2628
	5	5	18.0278	0.2774
	5	5.099	18.0278	0.2801
	5	5	17.0294	0.2936
	5.099	5	18.0278	0.2801
	6	5	17.0294	0.323
	5.099	5	18	0.2805
	5.099	5.099	17.0294	0.2994
	5	5.099	19.105	0.2643
	5	5	18.0278	0.2774
	5	5	19.0263	0.2628
	5	5	17.0294	0.2936
	5.099	5	18.0278	0.2801
	5	5	17.0294	0.2936
	5	5	18.0278	0.2774
	5.099	5.099	17.0294	0.2994
	5.099	5	18.0278	0.2801
	5	5	17.1172	0.2921
	5	5.099	18.1108	0.2788
	5.099	5	17.0294	0.2965
	5	5.099	18.1108	0.2788
	5.099	5.099	17.0294	0.2994
	5.099	4	19.0263	0.2391
	5	5	16.0312	0.3119
	5.099	5	18.0278	0.2801
	5.099	4	16.0312	0.2838
	5.099	5	19.0263	0.2654
	5	5	17.0294	0.2936
	5.099	5	18	0.2805
	5	5	16.1245	0.3101
	5.099	5	18.1108	0.2788
	5	5	16.0312	0.3119
	5	5	18.0278	0.2774
	5	5	17.1172	0.2921
	6	5.099	18.0278	0.3078
	5	5	17.0294	0.2936
	5	5.099	18.0278	0.2801
	5	5	17.0294	0.2936
	4	5.099	18.0278	0.2524
	4	4	17.0294	0.2349
	5	5.099	18.0278	0.2801
	6	4	17.0294	0.2936
	5	5.099	19.0263	0.2654
	5	4	17.0294	0.2642
	5.099	4	19.0263	0.2391
	5.099	5.099	17.0294	0.2994
	5.099	5	19.0263	0.2654
	5.099	4	17.0294	0.2672
	5.099	5	18.0278	0.2801
	5.099	5.099	17.0294	0.2994
	5.099	5	18.0278	0.2801
	5.099	5.099	17.0294	0.2994
	5.099	5	19.0263	0.2654
	5.099	5.099	17.1172	0.2979
	5.099	5	18.0278	0.2801
	5.099	5	17.0294	0.2965
	5.099	4	18.0278	0.2524
	5.099	5	17.0294	0.2965
	5.099	4	18.0278	0.2524
	4	4	16.0312	0.2495
	5.099	4	18.0278	0.2524
	5	4	16.0312	0.2807
	4.1231	4	19.0263	0.2135
	4	4	16.0312	0.2495
	5.099	5	18.0278	0.2801
	5	4	16.0312	0.2807
	4.1231	5	18.0278	0.253
	5.099	4	17.0294	0.2672
	4.1231	5	19.0263	0.2397
	5.099	5	17.0294	0.2965
	4	4.1231	18.0278	0.2253
	5	4	17.0294	0.2642
	4	4	18.0278	0.2219
	4	4	16.0312	0.2495
	4	4	18.0278	0.2219
	4	4	17.0294	0.2349
	5	4	18	0.25
	5	4	17.1172	0.2629
	5	4	19	0.2368
	5	5	16.0312	0.3119
	5	4	19	0.2368
	5	5	16	0.3125
	5	5.099	18.0278	0.2801
	5	5	17.0294	0.2936
	5	4.1231	19.0263	0.2397
	5	5	17.0294	0.2936
	5	5	19.0263	0.2628
	5.099	5	16.0312	0.315
	5	5	19.0263	0.2628
	5	5	16.0312	0.3119
	5	4	19.0263	0.2365
	5.099	5	17.0294	0.2965
	5	4.1231	19.0263	0.2397
	5	5	16.0312	0.3119
	5	5	19.0263	0.2628
	5.099	4	17.0294	0.2672
	5	5.099	19.0263	0.2654
	5.099	5.099	17.0294	0.2994
	5	5	19.0263	0.2628
	5.099	5.099	17.0294	0.2994
	5	5	18.0278	0.2774
	5	5	17.0294	0.2936
	5	5.099	18.0278	0.2801
	5.099	5.099	16.0312	0.3181
	5	5.099	18.0278	0.2801
	5.099	5.099	17.0294	0.2994
	4	5.099	19.0263	0.2391
	5.099	5.099	17.0294	0.2994
	5	5	19.0263	0.2628
	5	5	17.0294	0.2936
	5.099	6	18	0.3083
	5	5	17.0294	0.2936
	5	6	18.0278	0.3051
	5.099	5.099	17.0294	0.2994
	5	5	18.0278	0.2774
	5	5	17.1172	0.2921
	4	5	18.0278	0.2496
	5	5	17.0294	0.2936
	4	5.099	18.0278	0.2524
	5	5	17.0294	0.2936
	5	5	18.0278	0.2774
	5	5	17	0.2941
	5	5	18	0.2778
	4.1231	5	16.0312	0.2845
	5	5	18	0.2778
	5	5	17	0.2941
	5	5	18.0278	0.2774
	5	5	17	0.2941
	5	5	18	0.2778
	5	5	17.0294	0.2936
	5	5	18.0278	0.2774
	5	6	17.0294	0.323
	5	5	18	0.2778
	5	5	17	0.2941
	5	5	18	0.2778
	5	5	17.0294	0.2936
	5	4	18	0.25
	4	4	17.0294	0.2349
	4	5	18.0278	0.2496
	4	5	16.0312	0.2807
	4	5	18.0278	0.2496
	5.099	5.099	17.0294	0.2994
	4	5	18.0278	0.2496
	5.099	5.099	17.0294	0.2994
	5	5	18.0278	0.2774
	5.099	5.099	17	0.2999
	5.099	5	18	0.2805
	5.099	6.0828	17.0294	0.3283
	6	5	19	0.2895
	6	5	17.0294	0.323
	6	5	18	0.3056
	6.0828	6	17.0294	0.3548
	5	5	19.0263	0.2628
	5.099	6.0828	17.0294	0.3283
	6	6	19	0.3158
	5.099	5.099	17.0294	0.2994
	6	5	19	0.2895
	5.099	5.099	17.0294	0.2994
	5	6	18.0278	0.3051
	5.099	6.0828	18.0278	0.3101
	6	6	19.0263	0.3154
	6.0828	6.0828	18.1108	0.3359
	6	6	18.0278	0.3328
	6.0828	6	18.1108	0.3336
	5	6	18.0278	0.3051
	6.0828	6	17.1172	0.3529
	6	6.0828	18.0278	0.3351
	5.099	6	17.0294	0.3259
	6	6	18.0278	0.3328
	6.0828	6	17.1172	0.3529
	6	6	18.0278	0.3328
	5.099	5.099	18.0278	0.2828
	5	6	19.0263	0.2891
	6.0828	6	17.1172	0.3529
	6	5	18	0.3056
	5.099	5.099	18.0278	0.2828
	6.0828	5	18	0.3079
	5.099	5	17.0294	0.2965
	6	5	18	0.3056
	5.099	5.099	18.0278	0.2828
	5	5	18.0278	0.2774
	6.0828	6	17.1172	0.3529
	5	6	18.0278	0.3051
	5.099	5	17.1172	0.295
	6	5	19	0.2895
	5.099	5.099	18.0278	0.2828
	6	5	19	0.2895
	5.099	5.099	16.0312	0.3181
	5	6	18.0278	0.3051
	5.099	5.099	17.0294	0.2994
	5	6	19.0263	0.2891
	6.0828	6.0828	17.1172	0.3554
	5	6.0828	19.0263	0.2912
	5	6	17.1172	0.3213
	6	6.0828	19	0.318
	5	5	17.0294	0.2936
	6	5.099	19	0.2921
	5	5	17.0294	0.2936
	6	5	18	0.3056
	5	5	17.0294	0.2936
	6	5	18	0.3056
	5	5	17.0294	0.2936
	6	5	18	0.3056
	5	5	17.0294	0.2936
	6	5	19	0.2895
	5	5	17.0294	0.2936
	6.0828	5	18.0278	0.3074
	6.0828	5	17.0294	0.3254
	5	5	19.0263	0.2628
	5	5	17.1172	0.2921
	5	5	18.0278	0.2774
	6	5	17.1172	0.3213
	5	5.099	19.0263	0.2654
	6	6	17.1172	0.3505
	5	5.099	19.0263	0.2654
	6	6	17.1172	0.3505
	5	5	19.0263	0.2628
	5	5	17.1172	0.2921
	5	5.099	18.0278	0.2801
	5	5	17.0294	0.2936
	5	5	18.0278	0.2774
	5	5	17.1172	0.2921
	5	5.099	19.0263	0.2654
	5	5	17.1172	0.2921
	5	5.099	19.0263	0.2654
	5	5	17.1172	0.2921
	5	5	19.0263	0.2628
	5	5	17.1172	0.2921
	5	5.099	19.0263	0.2654
	5	5	17.1172	0.2921
	5	5.099	18	0.2805
	4	5	17.0294	0.2642
	5	5	18	0.2778
	5	5	17.0294	0.2936
	5.099	5	18	0.2805
	5	5	17.0294	0.2936
	5	5	18	0.2778
	4	5	17.0294	0.2642
	5	4	18	0.25
	4.1231	5.099	18.0278	0.2558
	5	5	18	0.2778
	5.099	5.099	17.0294	0.2994
	5	5	18	0.2778
	5.099	5.099	18.0278	0.2828
	5	5	18	0.2778
	5.099	5.099	18.0278	0.2828
	5	5	18.0278	0.2774
	5.099	5	18.0278	0.2801
	5	5	18	0.2778
	5.099	5	18.0278	0.2801
	6	5.099	18	0.3083
	6.0828	6	18.0278	0.3351
	6	6	18.0278	0.3328
	5.099	5.099	18.0278	0.2828
	6	6	18.0278	0.3328
	6.0828	6.0828	18.1108	0.3359
	6.0828	6	18.0278	0.3351
	6	6.0828	18.1108	0.3336
	5.099	6	18.0278	0.3078
	6.0828	6.0828	18.1108	0.3359
	6	6	18.0278	0.3328
	6	6.0828	17.1172	0.3529
	6	6.0828	19.0263	0.3175
	6.0828	6.0828	18.1108	0.3359
	6	6.0828	18.0278	0.3351
	6	6.0828	18.1108	0.3336
	6.0828	6	18.0278	0.3351
	6.0828	6.0828	18.1108	0.3359
	6.0828	6	18.0278	0.3351
	6	6.0828	17.1172	0.3529
	6.0828	6	18.0278	0.3351
	6	6.0828	17.1172	0.3529
	6	6	18.0278	0.3328
	6	6.0828	17.1172	0.3529
	6.0828	6	18.0278	0.3351
	6	6.0828	17.1172	0.3529
	6	6	18.0278	0.3328
	6.0828	6.0828	18.1108	0.3359
	6	6	18.0278	0.3328
	6	6.0828	17.1172	0.3529
	6	6	18.0278	0.3328
	6	6.0828	17.1172	0.3529
	6	6	18	0.3333
	6	6.0828	17.1172	0.3529
	6	6.0828	18.0278	0.3351
	6	6.0828	17.1172	0.3529
	6	6.0828	18.0278	0.3351
	6	6.0828	17.1172	0.3529
	6	6	19.0263	0.3154
	6.0828	6.0828	18.1108	0.3359
	6	6.0828	18.0278	0.3351
	6.0828	6.0828	18.0278	0.3374
	6	6	19	0.3158
	5.099	5	18.0278	0.2801
	6	5	19	0.2895
	5.099	5	18.0278	0.2801
	6	6	19	0.3158
	5.099	5	17.1172	0.295
	6	6	19.0263	0.3154
	5.099	6	17.1172	0.3242
	6	5	19	0.2895
	5.099	5	17.1172	0.295
	6	5	19	0.2895
	5	5	17.0294	0.2936
	6	5	19	0.2895
	5	5	17.1172	0.2921
	6	5	19	0.2895
	5.099	5.099	17.0294	0.2994
	6	6	19	0.3158
	5.099	5.099	17.0294	0.2994
	6	5	19	0.2895
	5	5.099	17.1172	0.295
	6	5	19	0.2895
	5.099	5.099	18.0278	0.2828
	6	5	19	0.2895
	6	6.0828	17.0294	0.3548
	5	5	19	0.2632
	5	5.099	17.0294	0.2965
	5	5	19	0.2632
	5	5.099	17.0294	0.2965
	5	6	19.0263	0.2891
	5	5.099	17.0294	0.2965
	5	6	19.0263	0.2891
	5	6.0828	17.0294	0.3254
	5.099	6	19.0263	0.2917
	6.0828	6.0828	17.0294	0.3572
	5.099	6	19.0263	0.2917
	5.099	6.0828	18.0278	0.3101
	5.099	6	19.0263	0.2917
	6.0828	6.0828	18.0278	0.3374
	6	6	19.0263	0.3154
	6.0828	6.0828	18.0278	0.3374
	5	6	19.0263	0.2891
	6.0828	6.0828	17.1172	0.3554
	5	6	19.0263	0.2891
	6	6.0828	17.1172	0.3529
	5.099	6	19.0263	0.2917
	6	6.0828	17.1172	0.3529
	5	6	19.0263	0.2891
	6.0828	6.0828	17.1172	0.3554
	5	6	19.0263	0.2891
	6.0828	6	18.1108	0.3336
	5	5	18.0278	0.2774
	5.099	5.099	18.1108	0.2815
	5.099	5	18.0278	0.2801
	5.099	5.099	18.0278	0.2828
	5	5	19	0.2632
	5	5	17.0294	0.2936
	5	4	18	0.25
	5	5.099	17.0294	0.2965
	5	5	18.0278	0.2774
	5	5.099	17.0294	0.2965
	5.099	5	18.0278	0.2801
	6	5.099	17.0294	0.3259
	5	4	18.0278	0.2496
	6	5.099	17.0294	0.3259
	5.099	5	18.0278	0.2801
	5	5	17.0294	0.2936
	5	5.099	19.0263	0.2654
	5	5.099	17.0294	0.2965
	5	5.099	19.0263	0.2654
	6.0828	5	17.1172	0.3237
	5	5	19.0263	0.2628
	5	5.099	17.1172	0.295
	5.099	5	18.0278	0.2801
	6	5	17.1172	0.3213
	5	5	19.0263	0.2628
	5	4	17.1172	0.2629
	5	5	18.1108	0.2761
	5	4.1231	17.0294	0.2679
	5	5.099	19.0263	0.2654
	5	5	17.1172	0.2921
	5	5	19.0263	0.2628
	5	5	17.1172	0.2921
	5	4	19.0263	0.2365
	5.099	5.099	18.1108	0.2815
	5.099	5	18.1108	0.2788
	5	5.099	17.1172	0.295
	5.099	5	18.1108	0.2788
	5	5.099	17.1172	0.295
	5.099	5	18.1108	0.2788
	5	5.099	17.0294	0.2965
	5.099	5	18.0278	0.2801
	5	5.099	17.1172	0.295
	5.099	5	18.0278	0.2801
	4.1231	4.1231	18.0278	0.2287
	5	4	18.0278	0.2496
	4	4.1231	17.0294	0.2385
	4	4.1231	19.0263	0.2135
	4.1231	4	17.0294	0.2385
	5.099	4	18.1108	0.2512
	4.1231	4.1231	18.0278	0.2287
	5.099	5	18.0278	0.2801
	5.099	4.1231	17.0294	0.2708
	5	5	18.0278	0.2774
	5.099	5.099	18.1108	0.2815
	5.099	5	18.0278	0.2801
	5	5	18.1108	0.2761
	4.1231	5	18.0278	0.253
	5.099	4	18.1108	0.2512
	5.099	5	19.0263	0.2654
	5	5.099	18.1108	0.2788
	5.099	5	19.0263	0.2654
	5	5.099	18.1108	0.2788
	5.099	5	18.0278	0.2801
	5.099	4.1231	18.1108	0.2546
	5.099	5	19.0263	0.2654
	5.099	5.099	18.1108	0.2815
	5.099	5	18.0278	0.2801
	5.099	5.099	18.0278	0.2828
	5.099	5	18.0278	0.2801
	5	5.099	18.1108	0.2788
	5.099	5	18.0278	0.2801
	6.0828	5	17.1172	0.3237
	5.099	5	19.0263	0.2654
	6.0828	5.099	17.1172	0.3266
	6.0828	5	19.0263	0.2912
	5.099	5.099	17.0294	0.2994
	5.099	5	18	0.2805
	5.099	5.099	18.1108	0.2815
	5.099	4	18	0.2528
	5.099	5.099	18.1108	0.2815
	4.1231	4	18	0.2256
	5	4	18.1108	0.2485
	4	4.1231	18	0.2256
	4	4	17.1172	0.2337
	4	3.1623	18	0.199
	4	4	18.1108	0.2209
	4	3.1623	18	0.199
	4.1231	4	18.1108	0.2243
	4	3	18	0.1944
	4	4	18.1108	0.2209
	4	3	18	0.1944
[truncated: 29,433 more rows]

## Sheet: eyeblink8-2
	A	B	C	EAR
	6.0828	6.0828	19.0263	0.3197
	7	6.0828	18.1108	0.3612
	6	6.0828	19.0263	0.3175
	6	5.099	18.0278	0.3078
	5.099	5.099	19.0263	0.268
	6	5.099	18.1108	0.3064
	7.0711	6.0828	19.105	0.3443
	6	6.0828	18.1108	0.3336
	6	6.0828	19.105	0.3162
	6	6.0828	18.1108	0.3336
	6	6.0828	19.0263	0.3175
	7	6.0828	18.1108	0.3612
	6	6.0828	19.0263	0.3175
	6	6.0828	18.1108	0.3336
	6	6	18.0278	0.3328
	6	6.0828	18.1108	0.3336
	6.0828	6.0828	18.1108	0.3359
	6.0828	6	18.1108	0.3336
	6.0828	6.0828	18.1108	0.3359
	6.0828	6.0828	17.1172	0.3554
	6	6.0828	18.1108	0.3336
	6	6.0828	17.2627	0.35
	6	6.0828	18.1108	0.3336
	6	6.0828	18.2483	0.3311
	6	6	19.0263	0.3154
	6	6.0828	18.1108	0.3336
	6.0828	7	19.0263	0.3438
	7.0711	6	18.1108	0.3609
	6.0828	6.0828	19.105	0.3184
	6.0828	6	18.2483	0.3311
	6.0828	6	19.105	0.3162
	6.0828	6	18.1108	0.3336
	6.0828	6	19.0263	0.3175
	6.0828	6	18.2483	0.3311
	6.0828	6	19.0263	0.3175
	6.0828	6	18.1108	0.3336
	6.0828	6	19.0263	0.3175
	6	6.0828	18.1108	0.3336
	6	6	19.0263	0.3154
	6.0828	6	18.1108	0.3336
	6	6	19.0263	0.3154
	6	6	18.1108	0.3313
	6.0828	6.0828	19.0263	0.3197
	6	6	18.1108	0.3313
	6	6	19.0263	0.3154
	6	6	18.1108	0.3313
	6.0828	6	19.0263	0.3175
	6	6.0828	18.1108	0.3336
	6.0828	6.0828	19.0263	0.3197
	6.0828	6	18.1108	0.3336
	6.0828	6.0828	19.0263	0.3197
	6.0828	6	18.1108	0.3336
	6.0828	6.0828	19.0263	0.3197
	6.0828	6	18.1108	0.3336
	6.0828	5	19.105	0.29
	6.0828	6	18.1108	0.3336
	5	6.0828	19.0263	0.2912
	6.0828	6	18.0278	0.3351
	5	5.099	18.0278	0.2801
	5	5.099	18.1108	0.2788
	5	5	19.0263	0.2628
	6	6.0828	17.1172	0.3529
	5	6	19.0263	0.2891
	5	5.099	17.0294	0.2965
	5.099	5	19.0263	0.2654
	5	5	18.0278	0.2774
	5.099	5	19.0263	0.2654
	5.099	5	18.0278	0.2801
	5.099	5	19.0263	0.2654
	5.099	5	18.1108	0.2788
	5.099	5	19	0.2658
	5.099	5	18.1108	0.2788
	5.099	5	19.0263	0.2654
	6.0828	6	18.0278	0.3351
	5	5	19.0263	0.2628
	5.099	5	18.0278	0.2801
	5.099	5	19.0263	0.2654
	6.0828	5	18.0278	0.3074
	5	5	19.0263	0.2628
	5.099	5	18.1108	0.2788
	5.099	5	19.0263	0.2654
	5.099	5	18.1108	0.2788
	5	5	18.0278	0.2774
	5	5	17.1172	0.2921
	4	5.099	18.0278	0.2524
	5	5	17.1172	0.2921
	5	5	18.0278	0.2774
	5	5	17.1172	0.2921
	5	5	18.0278	0.2774
	5.099	5	18.0278	0.2801
	5	5.099	18.0278	0.2801
	5.099	5	18.1108	0.2788
	5	4	18	0.25
	5	5	18.1108	0.2761
	5	4	18	0.25
	5	5.099	17.1172	0.295
	4	5	18.0278	0.2496
	5	5	17.0294	0.2936
	4.1231	5	19.0263	0.2397
	5	5	17.0294	0.2936
	5.099	4	19.0263	0.2391
	5	5	17.0294	0.2936
	5.099	4	19.0263	0.2391
	5	4	18.0278	0.2496
	5	4	19	0.2368
	4	5	17.0294	0.2642
	5	4	19	0.2368
	5.099	4	18.0278	0.2524
	5	5	19.0263	0.2628
	5.099	4	18.0278	0.2524
	5	4.1231	19	0.2401
	4.1231	4	18.0278	0.2253
	5	4	18	0.25
	5.099	5.099	18.0278	0.2828
	4	5.099	18.0278	0.2524
	5	5.099	18.0278	0.2801
	4	5	18.0278	0.2496
	5	5.099	17.0294	0.2965
	4	5	18.0278	0.2496
	5	5.099	17.1172	0.295
	4	5	18.0278	0.2496
	5	5	17.1172	0.2921
	5	5.099	18.0278	0.2801
	5	5	17.0294	0.2936
	5	6.0828	18.0278	0.3074
	5	5	17.1172	0.2921
	5.099	6	18.0278	0.3078
	6	5	17.1172	0.3213
	5	6.0828	19.105	0.29
	6.0828	5.099	17.1172	0.3266
	6	6	19.105	0.3141
	6	5.099	18.1108	0.3064
	6.0828	6.0828	19.105	0.3184
	6	5.099	18.1108	0.3064
	6.0828	6.0828	18.1108	0.3359
	6	5.099	18.1108	0.3064
	6.0828	6.0828	19.105	0.3184
	6	5	18.0278	0.3051
	6	6	19.105	0.3141
	7	5.099	18.1108	0.334
	6.0828	6.0828	19.105	0.3184
	7	6	18.1108	0.3589
	6.0828	6.0828	18.1108	0.3359
	6	5.099	18.0278	0.3078
	6.0828	6.0828	19.0263	0.3197
	6.0828	6	18.1108	0.3336
	6.0828	6.0828	19.105	0.3184
	6	6.0828	18.2483	0.3311
	6.0828	6.0828	19.0263	0.3197
	6	6.0828	18.1108	0.3336
	7.0711	6.0828	19.0263	0.3457
	6	5	17.0294	0.323
	6.0828	6.0828	19.105	0.3184
	7	6.0828	18.1108	0.3612
	6	6.0828	19.105	0.3162
	6	5.099	18.1108	0.3064
	6.0828	6.0828	19.0263	0.3197
	7	6.0828	18.1108	0.3612
	6.0828	6.0828	18.1108	0.3359
	7	6.0828	17.1172	0.3822
	6.0828	6.0828	19.0263	0.3197
	6	6.0828	18.1108	0.3336
	6.0828	6.0828	19.0263	0.3197
	6.0828	6	18.1108	0.3336
	6.0828	6.0828	19.0263	0.3197
	7	6.0828	18.1108	0.3612
	6	6.0828	19.0263	0.3175
	7.0711	6.0828	18.1108	0.3631
	6	6	19.0263	0.3154
	6	6.0828	18.1108	0.3336
	5	6.0828	19.105	0.29
	6	6.0828	18.1108	0.3336
	6.0828	6.0828	19.105	0.3184
	6	6.0828	18.1108	0.3336
	6.0828	6.0828	18.1108	0.3359
	6	5.099	18.1108	0.3064
	7.0711	6.0828	19.0263	0.3457
	6	6.0828	18.1108	0.3336
	6.0828	6.0828	18.0278	0.3374
	6	5.099	18.1108	0.3064
	6	6.0828	19.0263	0.3175
	6	6.0828	18.1108	0.3336
	6	6	19.0263	0.3154
	7	6.0828	18.1108	0.3612
	6.0828	6.0828	19.0263	0.3197
	6	6.0828	18.1108	0.3336
	6.0828	6.0828	19.0263	0.3197
	6	6.0828	18.1108	0.3336
	6	6.0828	19.0263	0.3175
	6	6.0828	18.1108	0.3336
	6	6	19.105	0.3141
	6	5.099	18.1108	0.3064
	6.0828	6	18.1108	0.3336
	6.0828	5	17.0294	0.3254
	6	5.099	18.0278	0.3078
	6.0828	6	17.1172	0.3529
	6	6.0828	19.0263	0.3175
	6	5.099	18.1108	0.3064
	6	5	19.0263	0.2891
	6	5.099	18.1108	0.3064
	6.0828	6	19.105	0.3162
	6	6.0828	18.2483	0.3311
	6	6	19.105	0.3141
	6	6	18.1108	0.3313
	6.0828	6	19.0263	0.3175
	6.0828	5	18.1108	0.306
	5	5	19.0263	0.2628
	5.099	5	18.1108	0.2788
	6	5	19.0263	0.2891
	6.0828	6	18.1108	0.3336
	5	5	19.0263	0.2628
	6.0828	6	18.1108	0.3336
	5	5	19.0263	0.2628
	6.0828	6	18.1108	0.3336
	5.099	5	19.0263	0.2654
	5	5	18.0278	0.2774
	6.0828	6	19.0263	0.3175
	6.0828	6	18.1108	0.3336
	6	6	19.0263	0.3154
	7.0711	7	18.1108	0.3885
	6.0828	5	19.105	0.29
	6.0828	5	18.2483	0.3037
	6.0828	5	19.0263	0.2912
	6.0828	5	18.2483	0.3037
	6.0828	5	19.0263	0.2912
	5.099	5	18.1108	0.2788
	6.0828	5.099	18.0278	0.3101
	5.099	5	18.1108	0.2788
	6.0828	7.0711	19.0263	0.3457
	7.0711	6	18.1108	0.3609
	6.0828	6.0828	19.0263	0.3197
	6.0828	6	18.1108	0.3336
	6.0828	6	19.0263	0.3175
	6.0828	5	18.2483	0.3037
	6.0828	6.0828	19.105	0.3184
	6.0828	6.0828	18.2483	0.3333
	6.0828	6.0828	19.105	0.3184
	6.0828	6	18.1108	0.3336
	6.0828	6.0828	19.105	0.3184
	6.0828	6	18.1108	0.3336
	6.0828	6	19.105	0.3162
	6.0828	7	18.1108	0.3612
	6.0828	6.0828	19.105	0.3184
	6	5	18.1108	0.3037
	6.0828	6	19.105	0.3162
	6	7	18.1108	0.3589
	5	6	19.105	0.2879
	6	6.0828	18.1108	0.3336
	6.0828	6	19.105	0.3162
	7	6	18.1108	0.3589
	5.099	6	19.0263	0.2917
	7	6.0828	18.1108	0.3612
	5.099	6	19.0263	0.2917
	6	6.0828	18.1108	0.3336
	6.0828	6.0828	19.105	0.3184
	6.0828	6	18.2483	0.3311
	6.0828	6.0828	19.0263	0.3197
	7.0711	7	18.2483	0.3855
	5.099	6.0828	19.0263	0.2939
	6	6	18.1108	0.3313
	5.099	6.0828	19.0263	0.2939
	6	6	18.1108	0.3313
	6.0828	6.0828	19.0263	0.3197
	6	6	18.1108	0.3313
	5.099	6	19.0263	0.2917
	6	6.0828	18.1108	0.3336
	6.0828	6	19.0263	0.3175
	6	6.0828	18.1108	0.3336
	5	4	18.0278	0.2496
	4	4	17.0294	0.2349
	3	3	18	0.1667
	3	3	17.0294	0.1762
	3	2	18	0.1389
	3.1623	3	17	0.1812
	2	3	18.0278	0.1387
	3	2	17.0294	0.1468
	4	3.1623	19.0263	0.1882
	3	3	17	0.1765
	3.1623	3.1623	18	0.1757
	4.1231	4	18.0278	0.2253
	4	4.1231	18	0.2256
	4	4	18.0278	0.2219
	4.1231	5	18.0278	0.253
	5	5	18	0.2778
	5.099	5	18.0278	0.2801
	5	5.099	18.0278	0.2801
	5.099	5	18.0278	0.2801
	4	4	18.0278	0.2219
	4.1231	5	18.0278	0.253
	5	5	18.1108	0.2761
	4.1231	4	18.0278	0.2253
	5	5	17.1172	0.2921
	4.1231	4	18.0278	0.2253
	5	5	18.1108	0.2761
	4.1231	4.1231	18.0278	0.2287
	5	5	18.1108	0.2761
	4.1231	5	18.0278	0.253
	5	5	18.1108	0.2761
	4.1231	5	18.0278	0.253
	5	5	17.1172	0.2921
	4	5	18.0278	0.2496
	5	5	18.1108	0.2761
	5	4.1231	19.0263	0.2397
	5.099	5.099	18.0278	0.2828
	5	5.099	18.0278	0.2801
	5	5.099	17.0294	0.2965
	5	5	19.0263	0.2628
	5	5	17.0294	0.2936
	5	5	19.0263	0.2628
	5.099	5	18.0278	0.2801
	5	4.1231	18.0278	0.253
	5.099	5	18.1108	0.2788
	4	5.099	18.0278	0.2524
	5.099	5	18.1108	0.2788
	4	5.099	18.0278	0.2524
	5.099	5.099	18.1108	0.2815
	4	4.1231	18.0278	0.2253
	5.099	5	18.0278	0.2801
	5	5.099	18.0278	0.2801
	5	5.099	18.1108	0.2788
	5	5.099	19.0263	0.2654
	5.099	5	18.1108	0.2788
	5	5.099	19.0263	0.2654
	5.099	4	18.0278	0.2524
	5	5.099	19.105	0.2643
	6.0828	6	18.0278	0.3351
	5	5.099	19.105	0.2643
	6	6.0828	18.0278	0.3351
	5	5.099	18.0278	0.2801
	5.099	5.099	18.0278	0.2828
	5	5	18.0278	0.2774
	6	5	17.0294	0.323
	6	5.099	19.105	0.2905
	6.0828	5	17.0294	0.3254
	5	5.099	19.0263	0.2654
	5	5.099	17.1172	0.295
	5	5.099	19.0263	0.2654
	6	5.099	18.1108	0.3064
	5	5	19.0263	0.2628
	6.0828	5	17.1172	0.3237
	5	5.099	19.0263	0.2654
	6.0828	6	17.1172	0.3529
	5	5	18.0278	0.2774
	6.0828	5	17.1172	0.3237
	6	6.0828	19.0263	0.3175
	6	5	18.0278	0.3051
	6	6.0828	19.105	0.3162
	6.0828	6	17.1172	0.3529
	6	6	18.1108	0.3313
	5.099	5.099	18.1108	0.2815
	6	6	19.105	0.3141
	5	5.099	18.0278	0.2801
	6	6.0828	19.0263	0.3175
	6	5	17.0294	0.323
	5	5.099	19.0263	0.2654
	6.0828	6	17.1172	0.3529
	6	6	19.105	0.3141
	6.0828	6	17.1172	0.3529
	6	5.099	19.0263	0.2917
	6.0828	6	17.1172	0.3529
	6	5	19.0263	0.2891
	6.0828	6	18.1108	0.3336
	6	6	18.0278	0.3328
	5.099	5	17.1172	0.295
	5	5.099	18.0278	0.2801
	5	4	18.0278	0.2496
	4	4.1231	18.0278	0.2253
	5.099	5	18.1108	0.2788
	5	4.1231	19.0263	0.2397
	5	5.099	18.1108	0.2788
	4	4	18.0278	0.2219
	5	5.099	18.1108	0.2788
	4	5.099	19.0263	0.2391
	5.099	5	18.1108	0.2788
	4	4.1231	18.0278	0.2253
	5.099	5	18.1108	0.2788
	5	4.1231	19	0.2401
	5.099	4.1231	18.0278	0.2558
	4	4.1231	18.0278	0.2253
	5	5	18.0278	0.2774
	5	4	19.0263	0.2365
	5	4	18.0278	0.2496
	4	5.099	18.0278	0.2524
	5	5	17.1172	0.2921
	5	5.099	18.0278	0.2801
	4	4	18.1108	0.2209
	5	4.1231	18	0.2534
	5.099	4	18.0278	0.2524
	5	5.099	18.0278	0.2801
	4.1231	4	18.0278	0.2253
	5	5.099	18.0278	0.2801
	4.1231	4.1231	18.0278	0.2287
	4	5.099	18.0278	0.2524
	5	5	18.1108	0.2761
	4	4.1231	18.0278	0.2253
	5	4	18.0278	0.2496
	3	4	18.0278	0.1941
	4	4	17.0294	0.2349
	3	2.2361	18.0278	0.1452
	3	2.2361	16	0.1636
	3.1623	2.2361	18	0.15
	2	3	17	0.1471
	2.2361	2	17.0294	0.1244
	2	3	16	0.1562
	3	2	18	0.1389
	3	2	17.0294	0.1468
	3	2	17	0.1471
	3	2	17	0.1471
	4	4.1231	17	0.2389
	3	3	17	0.1765
	4	3.1623	18	0.199
	4	4	18.0278	0.2219
	5	5.099	19.0263	0.2654
	4	4	18.0278	0.2219
	5	5.099	18.0278	0.2801
	4.1231	5	18.0278	0.253
	4	5.099	18.0278	0.2524
	5.099	5	18.1108	0.2788
	4	5.099	18.0278	0.2524
	4.1231	5	18.0278	0.253
	5	5	18.0278	0.2774
	4.1231	4	18.0278	0.2253
	5	5.099	18.0278	0.2801
	4.1231	5	18.0278	0.253
	4	4	18.0278	0.2219
	5	5	18.1108	0.2761
	5	5	18.0278	0.2774
	5	5	17.1172	0.2921
	5.099	5	18.0278	0.2801
	5	5	17.0294	0.2936
	5	5	18.0278	0.2774
	6	5	18.0278	0.3051
	5.099	5.099	18.0278	0.2828
	6	5	18.0278	0.3051
	5.099	5	18.0278	0.2801
	5	5	18.0278	0.2774
	6.0828	5	18.1108	0.306
	5	5	17.0294	0.2936
	5.099	5	18.0278	0.2801
	5	5	17.0294	0.2936
	6	5	18.1108	0.3037
	5.099	5	17.1172	0.295
	5	5.099	19.105	0.2643
	6.0828	6	17.1172	0.3529
	5	6.0828	19.105	0.29
	5	5.099	18.0278	0.2801
	5	5.099	19.0263	0.2654
	5	5.099	18.0278	0.2801
	5	5.099	19.0263	0.2654
	6	5	18.1108	0.3037
	5	5.099	19.0263	0.2654
	5	5	18.1108	0.2761
	5.099	5.099	19.0263	0.268
	6	5	18.1108	0.3037
	5	5.099	19.0263	0.2654
	5	5	18.0278	0.2774
	5	5.099	19.0263	0.2654
	6	5.099	17.1172	0.3242
	5	5.099	19.0263	0.2654
	6	5	18.1108	0.3037
	5.099	5.099	19.0263	0.268
	6	5.099	18.1108	0.3064
	5	6.0828	18.0278	0.3074
	6	5.099	17.1172	0.3242
	6	6.0828	19.0263	0.3175
	5	5.099	18.1108	0.2788
	5	6	18.0278	0.3051
	6.0828	5	17.1172	0.3237
	5	5	18.0278	0.2774
	6.0828	5	17.0294	0.3254
	5	6	18.0278	0.3051
	6.0828	5	17.1172	0.3237
	5.099	5	18.0278	0.2801
	6.0828	5	17.0294	0.3254
	5.099	5	18.0278	0.2801
	6	6	18.1108	0.3313
	5.099	5	18.0278	0.2801
	6	5	18.1108	0.3037
	5	5	18.1108	0.2761
	5	5	18.0278	0.2774
	5	5.099	19.0263	0.2654
	5.099	5	18.0278	0.2801
	5	5.099	19.0263	0.2654
	5.099	4	18.0278	0.2524
	5	5.099	18.0278	0.2801
	5.099	4	18.1108	0.2512
	5	4	18.0278	0.2496
	5	5	18.1108	0.2761
	4	4.1231	18.0278	0.2253
	4.1231	4	18.1108	0.2243
	5	5.099	18.0278	0.2801
	5.099	5.099	18.1108	0.2815
	4	5.099	18.0278	0.2524
	5.099	5.099	18.1108	0.2815
	4	4.1231	18.0278	0.2253
	5	5.099	18.1108	0.2788
	4	4	18.0278	0.2219
	5	4	17.1172	0.2629
	5	4.1231	18.0278	0.253
	5	4	18.0278	0.2496
	5	4.1231	18.0278	0.253
	5.099	4.1231	18.0278	0.2558
	5	4.1231	18.0278	0.253
	5	4	17.1172	0.2629
	4	4.1231	19.0263	0.2135
	5	5	18.1108	0.2761
	4	4.1231	18.0278	0.2253
	5	4	18.0278	0.2496
	5	5.099	18.0278	0.2801
	5.099	5	18.0278	0.2801
	4	5	18.0278	0.2496
	5.099	5	18.0278	0.2801
	5	4.1231	19.0263	0.2397
	5	5.099	18.0278	0.2801
	5	5	19.0263	0.2628
	5.099	4	18.0278	0.2524
	5	5	19.0263	0.2628
	5.099	4	18.0278	0.2524
	5	5	19.0263	0.2628
	5.099	5	18.1108	0.2788
	4	4.1231	18.0278	0.2253
	5.099	5.099	18.1108	0.2815
	4	5	18.0278	0.2496
	5.099	5.099	18.1108	0.2815
	5	5.099	18.0278	0.2801
	5.099	5.099	18.0278	0.2828
	5	5.099	18.0278	0.2801
	6.0828	5.099	18.0278	0.3101
	4	5	18.0278	0.2496
	5.099	5.099	18.0278	0.2828
	5	4.1231	18.0278	0.253
	5.099	5	18.1108	0.2788
	5	5.099	18.0278	0.2801
	5	6.0828	18.0278	0.3074
	5	5.099	18.0278	0.2801
	6.0828	5.099	18.0278	0.3101
	5	5.099	18.0278	0.2801
	5.099	5.099	18.0278	0.2828
	5	5	18	0.2778
	5.099	4.1231	18.0278	0.2558
	5	5	18.0278	0.2774
	5.099	4.1231	18.1108	0.2546
	4	5	18.0278	0.2496
	5.099	5	18.1108	0.2788
	5.099	5	19.0263	0.2654
	4	4.1231	18.0278	0.2253
	5	5	18.0278	0.2774
	5	5.099	18.0278	0.2801
	5	5	18.0278	0.2774
	5.099	5.099	18.0278	0.2828
	4	5.099	18.0278	0.2524
	5	5	18.0278	0.2774
	5	4.1231	18.0278	0.253
	5.099	5.099	18.0278	0.2828
	5	5.099	18.0278	0.2801
	5	4.1231	18.0278	0.253
	5	5.099	18	0.2805
	5.099	4.1231	18.0278	0.2558
	5	5.099	18.0278	0.2801
	5.099	4	18.0278	0.2524
	4	4	18.0278	0.2219
	5.099	5	18.1108	0.2788
	4	5.099	18.0278	0.2524
	4.1231	4.1231	18.0278	0.2287
	4	5.099	19.0263	0.2391
	5.099	5.099	18.1108	0.2815
	4	4.1231	18.0278	0.2253
	4.1231	5	18.0278	0.253
	4	4.1231	19.0263	0.2135
	5	5	18.1108	0.2761
	5	5.099	18.0278	0.2801
	5.099	5	18.0278	0.2801
	4	4.1231	18	0.2256
	5.099	4.1231	18.0278	0.2558
	3	4	18	0.1944
	3.1623	3	17	0.1812
	3	2	18	0.1389
	2.2361	3	17	0.154
	2.2361	3	17.0294	0.1537
	2	3.1623	16	0.1613
	2	2	18.0278	0.1109
	2	3	17	0.1471
	3	2	18	0.1389
	3	3	17	0.1765
	4	3	18	0.1944
	3	3	17	0.1765
	4	3	18	0.1944
	4	3	17.0294	0.2055
	4	4.1231	18.0278	0.2253
	4	4	18.0278	0.2219
	4	4.1231	18.0278	0.2253
	4	5	18.1108	0.2485
	4	4.1231	18.0278	0.2253
	5	5	18.0278	0.2774
	4.1231	4	19.0263	0.2135
	5	5	18.0278	0.2774
	4.1231	4	19.0263	0.2135
	5	5	18.1108	0.2761
	4	5	19.0263	0.2365
	4	5	18.0278	0.2496
	4	5	19.0263	0.2365
	4.1231	5	18.0278	0.253
	4	5.099	18.0278	0.2524
	4	5	18.0278	0.2496
	4	5.099	18.0278	0.2524
	4	4	18.0278	0.2219
	4	5	19.0263	0.2365
	4	5	18.1108	0.2485
	4.1231	5	19.0263	0.2397
	4	5	18.0278	0.2496
	4	4	18.0278	0.2219
	4.1231	5	18.0278	0.253
	4.1231	4.1231	18	0.2291
	5	4	18.0278	0.2496
	4	4.1231	19.0263	0.2135
	5	5	18.0278	0.2774
	4.1231	4.1231	18.0278	0.2287
	5	5	18.1108	0.2761
	4	4.1231	19.0263	0.2135
	5	5	18.1108	0.2761
	4.1231	4	18.0278	0.2253
	5	4	18.0278	0.2496
	4.1231	4	18.0278	0.2253
	5	5	18.0278	0.2774
	5.099	4	18.0278	0.2524
	5	4	18.0278	0.2496
	5.099	5	18.0278	0.2801
	5	4	18.0278	0.2496
	5.099	4	18.0278	0.2524
	5	5	17.0294	0.2936
	5	5.099	19.0263	0.2654
	5	5	17.0294	0.2936
	5	5.099	19.0263	0.2654
	5.099	5	17.0294	0.2965
	5	6.0828	18.0278	0.3074
	5.099	5	17.0294	0.2965
	5	5.099	19.0263	0.2654
	6.0828	5	17.0294	0.3254
	6	5.099	19.0263	0.2917
	6.0828	6	17.1172	0.3529
	6.0828	5	18.0278	0.3074
	6.0828	6	17.1172	0.3529
	6.0828	6	18.1108	0.3336
	5.099	5	17.1172	0.295
	6	5.099	19.105	0.2905
	6	5	17.1172	0.3213
	6.0828	5.099	18.0278	0.3101
	6	5	17.1172	0.3213
	5	5.099	18.0278	0.2801
	6	6	17.1172	0.3505
	5	5.099	18.0278	0.2801
	6	6.0828	18.1108	0.3336
	6.0828	6	18.1108	0.3336
	6	5.099	18.1108	0.3064
	6	5.099	18.1108	0.3064
	6	5.099	18.0278	0.3078
	6	5.099	18.1108	0.3064
	6	5.099	18.1108	0.3064
	6.0828	6.0828	18.1108	0.3359
	5.099	6	17.1172	0.3242
	5.099	6	18.0278	0.3078
	6	6	17.1172	0.3505
	5	5.099	18.0278	0.2801
	6	6.0828	18.1108	0.3336
	5	5.099	18.0278	0.2801
	6	6	18.1108	0.3313
	5	5.099	18.0278	0.2801
	6	6.0828	18.1108	0.3336
	5	5.099	18.0278	0.2801
	6	6.0828	18.1108	0.3336
	6	6.0828	18.0278	0.3351
	6	6.0828	17.1172	0.3529
	6.0828	6	18.1108	0.3336
	5	5.099	17.0294	0.2965
	6.0828	6.0828	19.105	0.3184
	7	6.0828	18.1108	0.3612
	6.0828	6	19.105	0.3162
	5	5.099	17.1172	0.295
	6.0828	6	19.0263	0.3175
	6	6.0828	17.1172	0.3529
	6	5.099	18.0278	0.3078
	6	6.0828	18.1108	0.3336
	6	6.0828	18.1108	0.3336
	6	6.0828	18.1108	0.3336
	5	5.099	18.0278	0.2801
	6	6.0828	18.1108	0.3336
	5	6.0828	18.0278	0.3074
	6	6.0828	18.1108	0.3336
	6	6.0828	18.0278	0.3351
	6	7.0711	18.1108	0.3609
	6	6	19.105	0.3141
	5	6.0828	18.1108	0.306
	6	5.099	18.1108	0.3064
	6	6	18.1108	0.3313
	6	5	19.0263	0.2891
	5	6.0828	18.0278	0.3074
	6	6.0828	18.1108	0.3336
	6	5.099	18.0278	0.3078
	5	6.0828	18.0278	0.3074
	6	6.0828	18.1108	0.3336
	5	5.099	19.0263	0.2654
	6	6.0828	18.1108	0.3336
	5	5	19.0263	0.2628
	6	6.0828	18.1108	0.3336
	5	6	19.0263	0.2891
	6.0828	6	18.1108	0.3336
	6	6	19.0263	0.3154
	6.0828	5	18.1108	0.306
	4.1231	5	18.0278	0.253
	4	4	17.0294	0.2349
	3	3.1623	18.0278	0.1709
	3	4	17.0294	0.2055
	3	2	18	0.1389
	3	2	16	0.1562
	3	2	18	0.1389
	3	3	17.0294	0.1762
	3	2	17.0294	0.1468
	3	2	17	0.1471
	4.1231	3.1623	18	0.2024
	3	3	17	0.1765
	2	3	17	0.1471
	2	3	17	0.1471
	4	3	18	0.1944
	4.1231	3	16	0.2226
	2	3	18	0.1389
	3	3	16	0.1875
	3	2	17	0.1471
	3	3	17	0.1765
	3	3	17	0.1765
	3	2	17	0.1471
	3	3	17	0.1765
	3.1623	3	16	0.1926
	2	3	18	0.1389
	3	3	17	0.1765
	3	3	18	0.1667
	3	2	17	0.1471
	3	3	18	0.1667
	4	3.1623	18.0278	0.1986
	3.1623	4.1231	18.0278	0.2021
	4	4	17	0.2353
	4.1231	4.1231	18.0278	0.2287
	4	3	17.0294	0.2055
	4.1231	4.1231	18.0278	0.2287
	4	4	17.0294	0.2349
	4.1231	5	18.0278	0.253
	4	4	17.0294	0.2349
	4	5	18.0278	0.2496
	4	4	17.0294	0.2349
	4	4	18.0278	0.2219
	4.1231	4	18.0278	0.2253
	4.1231	4	18.0278	0.2253
	5.099	5	18.1108	0.2788
	4.1231	4.1231	18.0278	0.2287
	5	5	17.0294	0.2936
	5	5.099	18.0278	0.2801
	5	4	18.0278	0.2496
	5.099	5	18.0278	0.2801
	5	5	17.1172	0.2921
	5	5.099	18.0278	0.2801
	5	5	17.1172	0.2921
	5	4.1231	19.0263	0.2397
	5	5	17.1172	0.2921
	6	5.099	18.0278	0.3078
	5	5	17.0294	0.2936
	5.099	5	18	0.2805
	5	5	18.0278	0.2774
	5	5.099	19.0263	0.2654
	6	4	17.0294	0.2936
	5	5.099	19.0263	0.2654
	6	4	18.0278	0.2774
	6	5.099	19.0263	0.2917
	5	5	17.0294	0.2936
	6	5.099	19.0263	0.2917
	5	5	17.0294	0.2936
	5	5.099	19.0263	0.2654
	6	5	17.1172	0.3213
	5.099	5	18.0278	0.2801
	6	5	17.1172	0.3213
	5	5.099	18.0278	0.2801
	6	5	17.1172	0.3213
	5	5.099	19.0263	0.2654
	5.099	5	17.0294	0.2965
	6.0828	5.099	18.0278	0.3101
	6	5	17.0294	0.323
	5	5.099	19.0263	0.2654
	6.0828	5	17.1172	0.3237
	5	5.099	19.0263	0.2654
	6	6	17.1172	0.3505
	5	5.099	19.0263	0.2654
	5.099	5	17.0294	0.2965
	6	5.099	19.0263	0.2917
	5	5	17.0294	0.2936
	5	5.099	19.0263	0.2654
	5.099	5	17.0294	0.2965
	6	6.0828	19.0263	0.3175
	5	5	17.0294	0.2936
	5	5.099	19.0263	0.2654
	5	5	17.0294	0.2936
	5	5.099	18.0278	0.2801
	5	4	17.0294	0.2642
	5	5	19.0263	0.2628
	6.0828	5	18.1108	0.306
	5	5	19.0263	0.2628
	5	5	17.1172	0.2921
	5	5.099	19.0263	0.2654
	5	5	17.1172	0.2921
	5	5	19.0263	0.2628
	5	5	17.1172	0.2921
	5	5.099	18.1108	0.2788
	6	6	17.1172	0.3505
	5	5.099	19.0263	0.2654
	6.0828	5	17.0294	0.3254
	5	5	19.0263	0.2628
	5.099	5	18.0278	0.2801
	5	5	19.105	0.2617
	6.0828	6	18.0278	0.3351
	5.099	5	19.105	0.2643
	5	5	17.1172	0.2921
	5.099	5	19.0263	0.2654
	5	5	17.1172	0.2921
	4	4	18.0278	0.2219
	5	5	17.1172	0.2921
	4.1231	4	19.0263	0.2135
	5	5	17.1172	0.2921
	5.099	5	19.0263	0.2654
	5	5	18.1108	0.2761
	5.099	5	19.0263	0.2654
	5	5	17.1172	0.2921
	5.099	5	19.105	0.2643
	5	5	17.1172	0.2921
	5.099	5	19.0263	0.2654
	5	5	17.1172	0.2921
	5	5	19.0263	0.2628
	5	5	17.1172	0.2921
	5	5	19.0263	0.2628
	5	5	17.1172	0.2921
	5	5	19.0263	0.2628
	5	5	17.1172	0.2921
	4	4	19.0263	0.2102
	5	5	17.1172	0.2921
	5	5	19.0263	0.2628
	4	4	17.0294	0.2349
	5.099	5	19.0263	0.2654
	4	4	17.0294	0.2349
	4.1231	5	19.0263	0.2397
	5	5.099	17.0294	0.2965
	5.099	5	18.0278	0.2801
	5	5	17.1172	0.2921
	5.099	5	19.105	0.2643
	5	5	18.1108	0.2761
	5	5	19.0263	0.2628
	5	4	18.0278	0.2496
	5	5.099	18.0278	0.2801
	5	5	17.0294	0.2936
	5	5.099	19.0263	0.2654
	5	4	17.0294	0.2642
	5	4.1231	19.0263	0.2397
	5	5	17.0294	0.2936
	5	4.1231	18.0278	0.253
	5	5	17.1172	0.2921
	5	4.1231	19.0263	0.2397
	5	5	17.1172	0.2921
	5	5.099	19.0263	0.2654
	5	5	17.1172	0.2921
	5	5.099	18.0278	0.2801
	5.099	4	17.0294	0.2672
	4	5.099	19.0263	0.2391
	5.099	5	17.0294	0.2965
	5	5.099	19.0263	0.2654
	6.0828	5	17.0294	0.3254
	5	5.099	18.0278	0.2801
	6.0828	5	17.0294	0.3254
	5	5.099	19.0263	0.2654
	5.099	5	18.1108	0.2788
	5	5.099	19.0263	0.2654
	5	5	17.1172	0.2921
	5	5.099	19.0263	0.2654
	5	5	17.1172	0.2921
	5	4.1231	19.0263	0.2397
	5	5	17.0294	0.2936
	5.099	5.099	18.0278	0.2828
	5	4	17.1172	0.2629
	5.099	5	18.0278	0.2801
	6	4	17.1172	0.2921
	5.099	5	18.0278	0.2801
	6	6	18.1108	0.3313
	5.099	5	18.0278	0.2801
	6	4	18.1108	0.2761
	5.099	5	18.0278	0.2801
	5	5.099	18.1108	0.2788
	5	4.1231	19.0263	0.2397
	5.099	5.099	18.1108	0.2815
	4	5	18.0278	0.2496
	5	5	17.1172	0.2921
	4	5	18.0278	0.2496
	5	5	18.0278	0.2774
	4	5	18.0278	0.2496
	5.099	5	17.0294	0.2965
	5	5	18.0278	0.2774
	5	5.099	18.0278	0.2801
	4	5.099	18.0278	0.2524
	5.099	5	18.0278	0.2801
	4	4.1231	18.0278	0.2253
	5	5	17.1172	0.2921
	4	4.1231	19.0263	0.2135
	5	4	18.1108	0.2485
	5.099	5	19.0263	0.2654
	5	5	17.1172	0.2921
	4.1231	4	19.0263	0.2135
	5	5	17.1172	0.2921
	5.099	5	19.0263	0.2654
	5	5	18.0278	0.2774
	5.099	5	19.0263	0.2654
	5	5	17.0294	0.2936
	5.099	5	19.0263	0.2654
	5	5.099	17.0294	0.2965
	5	5	19.0263	0.2628
	5	5.099	17.0294	0.2965
	5	5	19.0263	0.2628
	5	5.099	17.1172	0.295
	5	5	19.0263	0.2628
	5	5.099	17.0294	0.2965
	5	5.099	18.0278	0.2801
	5	5	17.1172	0.2921
	5	5.099	18.0278	0.2801
	5	5	17.1172	0.2921
	5	5.099	18.0278	0.2801
	5	5.099	17.1172	0.295
	6	6.0828	18.0278	0.3351
	5	5.099	18.1108	0.2788
	6.0828	6.0828	19.0263	0.3197
	6	6.0828	18.0278	0.3351
	6.0828	6.0828	18.1108	0.3359
	6	7.0711	18.1108	0.3609
	6.0828	6	19.105	0.3162
	6	6.0828	18.0278	0.3351
	5.099	5	19.105	0.2643
	5	5.099	17.1172	0.295
	3	3	17	0.1765
	4	3	17	0.2059
	3	3	18	0.1667
	3	3	17	0.1765
	3	3	18	0.1667
	3	3	17	0.1765
	3	2	18	0.1389
	3	3	18.0278	0.1664
	3	4.1231	18.0278	0.1976
	3.1623	4	18	0.199
	4	4.1231	18	0.2256
	4	4	17.0294	0.2349
	5	5.099	18.0278	0.2801
	5	5	17.0294	0.2936
	5	4.1231	18.0278	0.253
	5.099	5	18.1108	0.2788
	4	5.099	18.0278	0.2524
	5.099	5	18.0278	0.2801
	5	5.099	18.0278	0.2801
	5.099	5	18.0278	0.2801
	5	5	18.0278	0.2774
	6	6.0828	18.1108	0.3336
	5	5	18.0278	0.2774
	6	5	17.1172	0.3213
	6	5	18.0278	0.3051
	5	5	17.0294	0.2936
	6	5	19.0263	0.2891
	5	5	18.0278	0.2774
	5.099	5	18.1108	0.2788
	5	5	18.1108	0.2761
	5.099	5	18.1108	0.2788
	6	5	17.0294	0.323
	5	5.099	18.0278	0.2801
	5	5	17.1172	0.2921
	5.099	5	18.0278	0.2801
	5.099	5	17.1172	0.295
	5.099	5	18.0278	0.2801
	5.099	5	17.1172	0.295
	5.099	5	18.0278	0.2801
	6.0828	5	17.1172	0.3237
	6	5.099	19.0263	0.2917
	6.0828	6	17.1172	0.3529
	6	5.099	19.0263	0.2917
	6	5	17.1172	0.3213
	5	5.099	19.0263	0.2654
	5.099	5	17.0294	0.2965
	5	5.099	19.0263	0.2654
	5	5.099	18.0278	0.2801
	6	5.099	19.105	0.2905
	5	5	18.0278	0.2774
	5	5.099	19.0263	0.2654
	6.0828	5	17.1172	0.3237
	5	5.099	19.0263	0.2654
	6.0828	5	17.1172	0.3237
	5.099	5	18.0278	0.2801
	5.099	5	17.1172	0.295
	5.099	5	18.0278	0.2801
	5	5	18.1108	0.2761
	5	5.099	19.0263	0.2654
	6	5	17.1172	0.3213
	5	5.099	19.0263	0.2654
	6.0828	5	17.1172	0.3237
	6.0828	5	18.1108	0.306
	6	6	18.1108	0.3313
	5	5.099	19.0263	0.2654
	5	5	18.0278	0.2774
	6	5.099	19.105	0.2905
	6.0828	5	17.1172	0.3237
	6	5.099	18.1108	0.3064
	6.0828	5.099	17.1172	0.3266
	5	5.099	19.0263	0.2654
	6	5	18.1108	0.3037
	5	5	18.0278	0.2774
	5	5	17.0294	0.2936
	5.099	5	18.0278	0.2801
	5	5	17.0294	0.2936
	5	5.099	19.0263	0.2654
	5	5	17.1172	0.2921
	5	5	18.0278	0.2774
	5.099	5	17.0294	0.2965
	5	5	19.105	0.2617
	5	5	16.0312	0.3119
	5.099	5	18.0278	0.2801
	5	5	17.0294	0.2936
	5	5	18.0278	0.2774
	5	5	16.0312	0.3119
	5.099	5	18.1108	0.2788
	5	5	16.0312	0.3119
	5.099	5.099	19.105	0.2669
	5	5	17.0294	0.2936
	5.099	5	18.0278	0.2801
	5	4	16.0312	0.2807
	5.099	4	18.0278	0.2524
	5	4	17.0294	0.2642
	5.099	4	18.0278	0.2524
	5	5	17.0294	0.2936
	5	5	19.0263	0.2628
	5	5	17.0294	0.2936
	5.099	5	18.0278	0.2801
	5	5	17.0294	0.2936
	5.099	5	18.0278	0.2801
	5	5	17.0294	0.2936
	5.099	5	18.0278	0.2801
	5	5	17.0294	0.2936
	5	5	18.0278	0.2774
	5	5	17.0294	0.2936
	5	4	19.0263	0.2365
	4	5	17.0294	0.2642
	4	5	18.0278	0.2496
	4	4	16.0312	0.2495
	5	5.099	19.0263	0.2654
	5	5	17.1172	0.2921
	5	5	19.0263	0.2628
	5	5	17.1172	0.2921
	4	5.099	19.0263	0.2391
	5	5	17.0294	0.2936
	4	5.099	18.0278	0.2524
	5.099	4	17.0294	0.2672
	4	5.099	19.0263	0.2391
	5	4	17.0294	0.2642
	5	5.099	19.0263	0.2654
	5.099	5.099	17.0294	0.2994
	5.099	5	18.0278	0.2801
	4.1231	4	17.0294	0.2385
	4	5	18.0278	0.2496
	4.1231	4	17.0294	0.2385
	5.099	5	18.0278	0.2801
	5	5	17.0294	0.2936
	5.099	5	18	0.2805
	5	5	17.1172	0.2921
	5	4	18.0278	0.2496
	5	5	17.1172	0.2921
	4	4	18.0278	0.2219
	5	5	17.0294	0.2936
	5	5.099	19	0.2658
	5	5	17.0294	0.2936
	5	4	18.0278	0.2496
	5	5	17.0294	0.2936
	4	4	19.0263	0.2102
	4	4	17.0294	0.2349
	4	5.099	19.0263	0.2391
	5	4	17.0294	0.2642
	4	5	19.0263	0.2365
	5	4	17.0294	0.2642
	5	5	19.0263	0.2628
	5	5	17.0294	0.2936
	4	5	18.0278	0.2496
	4	4.1231	18.0278	0.2253
	4	5.099	19.0263	0.2391
	4.1231	4	18.0278	0.2253
	4	5.099	19.0263	0.2391
	5	4.1231	17.0294	0.2679
	4.1231	5	18.0278	0.253
	4.1231	4.1231	17.0294	0.2421
	5.099	5	18.0278	0.2801
	5	5	17.0294	0.2936
	4	5	19.0263	0.2365
	5.099	4.1231	18.0278	0.2558
	4	5	18.0278	0.2496
	5	4	17.0294	0.2642
	4.1231	5	18.0278	0.253
	5.099	4.1231	18.0278	0.2558
	4.1231	5	18.0278	0.253
	5.099	4	17.0294	0.2672
	4	4	18.0278	0.2219
	5	4	17.0294	0.2642
	4	4.1231	18.0278	0.2253
	4	5	17.0294	0.2642
	4	5	18.0278	0.2496
	4	5	17.0294	0.2642
	4	4	18.0278	0.2219
	4	5	17.0294	0.2642
	4	4	18.0278	0.2219
	4.1231	4	18.0278	0.2253
	4	3	18	0.1944
	4	4	17.0294	0.2349
	3	3	17	0.1765
	3	3	17	0.1765
	3	2	18.0278	0.1387
	3	3	17.0294	0.1762
	3	3	18	0.1667
	3	3	17.0294	0.1762
	3	3	17	0.1765
	4	3	17	0.2059
	3	3	18	0.1667
	3.1623	4	16.0312	0.2234
	3	2	17	0.1471
	3	3	17.0294	0.1762
	3	2	17	0.1471
	3	3	17	0.1765
	3	2	18.0278	0.1387
	3	2	17	0.1471
	3	2	17	0.1471
	3	2	17	0.1471
	3	4	18.0278	0.1941
	3	4	17.0294	0.2055
	4	4	18.0278	0.2219
	4	4	17.0294	0.2349
	5.099	4	18.0278	0.2524
	4	4	17.0294	0.2349
	4	5	18.0278	0.2496
	5	4	17.0294	0.2642
	4	4.1231	19.0263	0.2135
	4.1231	5.099	18.0278	0.2558
	4	4.1231	19	0.2138
	4	4.1231	18.0278	0.2253
	4.1231	4.1231	18	0.2291
	4.1231	4	17	0.2389
	4	4.1231	19	0.2138
	4.1231	4.1231	17	0.2425
	4	5.099	18.0278	0.2524
	5	4	17.0294	0.2642
	4.1231	4	18.0278	0.2253
	4	5	17.0294	0.2642
	4.1231	4	18.0278	0.2253
	4	4	17	0.2353
	4.1231	4	18.0278	0.2253
	5.099	5.099	18.0278	0.2828
	4	5	18.0278	0.2496
	4	5	17.0294	0.2642
	4	4.1231	19	0.2138
	5	4	17.0294	0.2642
	4	4.1231	18.0278	0.2253
	5.099	5.099	17.1172	0.2979
	4	4.1231	18.0278	0.2253
	4	5	17.0294	0.2642
	5	5.099	18.0278	0.2801
	5	5	17.1172	0.2921
	5	5.099	18.0278	0.2801
	4	4	17.0294	0.2349
	5	5	18.0278	0.2774
	4	5	17.0294	0.2642
	5	5	19.0263	0.2628
	5	5	17.1172	0.2921
	5.099	5	18.0278	0.2801
	5	6.0828	17.1172	0.3237
	5	5.099	18.0278	0.2801
	5.099	5	18.1108	0.2788
	5	5	19.0263	0.2628
	5	6	17.1172	0.3213
	5	5	19.0263	0.2628
	5	5.099	17.0294	0.2965
	4.1231	5	19.0263	0.2397
	5.099	5.099	18.0278	0.2828
	5	5.099	18.0278	0.2801
	5.099	5	18.0278	0.2801
	5	5	19.0263	0.2628
	6.0828	6	18.1108	0.3336
	5.099	6	19.0263	0.2917
	6	6	17.1172	0.3505
	6.0828	6	19.0263	0.3175
	5	5.099	17.0294	0.2965
	5.099	6	19.0263	0.2917
	6.0828	5.099	18.1108	0.3087
	6	6.0828	18.0278	0.3351
	5	5.099	18.0278	0.2801
	5	5.099	18.1108	0.2788
	6.0828	6	18.0278	0.3351
	5	6	19.0263	0.2891
	6.0828	6	18.1108	0.3336
	5	6.0828	18.0278	0.3074
	5	5	18.0278	0.2774
	5	6	19.0263	0.2891
	5.099	5	18.1108	0.2788
	5	5	18.0278	0.2774
	6.0828	6	18.1108	0.3336
	5	5	18.0278	0.2774
	6.0828	6	18.1108	0.3336
	6	6	19.0263	0.3154
	5	5	18.0278	0.2774
	6	6.0828	18.0278	0.3351
	6	5.099	18.1108	0.3064
	6	6	19.0263	0.3154
	6	5	18.0278	0.3051
	5	5.099	18.0278	0.2801
	6	6.0828	18.1108	0.3336
	5	5.099	18.0278	0.2801
	5	5.099	18.1108	0.2788
	5	5	18.0278	0.2774
	5	5	18.1108	0.2761
	5	5.099	18.0278	0.2801
	5.099	5	18.1108	0.2788
	5	5	19.0263	0.2628
	5.099	6	18.1108	0.3064
	5	5	18.0278	0.2774
	6.0828	6	18.1108	0.3336
	5	5	19.0263	0.2628
	6.0828	6	18.0278	0.3351
	5	5	18.0278	0.2774
	6.0828	5	18.1108	0.306
	5	5	19.105	0.2617
	6.0828	6	18.1108	0.3336
	5	5	19.0263	0.2628
	6	6	18.0278	0.3328
	5	6.0828	18.0278	0.3074
	5.099	5	18.1108	0.2788
	6	6	18.0278	0.3328
	5.099	5	18.0278	0.2801
	5	5.099	18.0278	0.2801
	5	5	18.0278	0.2774
	5	5.099	18.0278	0.2801
	5.099	5	18.0278	0.2801
	4	5	18.0278	0.2496
	5.099	5	18.0278	0.2801
	5	5.099	18.0278	0.2801
	5	5	17.0294	0.2936
	5	5.099	18.0278	0.2801
	5	5.099	17.1172	0.295
	5	5.099	18.0278	0.2801
	5	5	17.0294	0.2936
	5	5.099	18.0278	0.2801
	5	5	18.0278	0.2774
	5	5.099	18.0278	0.2801
	5	5.099	18.0278	0.2801
	5	5.099	18.0278	0.2801
	5.099	4	18.0278	0.2524
	5	5	18.0278	0.2774
	5.099	5	18.0278	0.2801
	5	5.099	18.1108	0.2788
	5.099	6	18.0278	0.3078
	4	5	18.0278	0.2496
	5.099	5.099	18.0278	0.2828
	4	4.1231	18.0278	0.2253
	5.099	5	18.1108	0.2788
	4	4	18.0278	0.2219
	5	5	17.0294	0.2936
	4	4.1231	18.0278	0.2253
	5.099	5	18.1108	0.2788
	4	4.1231	18.0278	0.2253
	5.099	5.099	18.0278	0.2828
	5	5	18.0278	0.2774
	4.1231	4.1231	18.0278	0.2287
	4	4	18	0.2222
	5.099	4.1231	18.0278	0.2558
	4	4	18.0278	0.2219
	5	4	18.0278	0.2496
	4	4	18	0.2222
	4	4	18.0278	0.2219
	5	5.099	18	0.2805
	5.099	4	18.0278	0.2524
	4	5	18.0278	0.2496
	4	4	17.0294	0.2349
	4	4.1231	18.0278	0.2253
	4.1231	5.099	18.0278	0.2558
	4	4	18.0278	0.2219
	4	5	18	0.25
	4	4	18.0278	0.2219
	4.1231	5.099	18.0278	0.2558
	4	5	18.0278	0.2496
	4	4	17.0294	0.2349
	5	5	18.0278	0.2774
	5.099	4.1231	18.0278	0.2558
	3.1623	4	18.0278	0.1986
	3	3	17.0294	0.1762
	3	3	17	0.1765
	3	3	16	0.1875
	3	3	18	0.1667
	3	3.1623	16	0.1926
	3	2	17	0.1471
	3	2	17	0.1471
	3	2	18	0.1389
	3	2	17	0.1471
	3	3	17	0.1765
	3	3	17.0294	0.1762
	3	3	18	0.1667
	3	4	18	0.1944
	4	3	18.0278	0.1941
	4	4	18.0278	0.2219
	4	4	18	0.2222
	4.1231	3	18.0278	0.1976
	4	4.1231	18	0.2256
	4.1231	3.1623	18.0278	0.2021
	4	4	18.0278	0.2219
	4	3	18.0278	0.1941
	4	4	18	0.2222
	4	4	17.0294	0.2349
	3	4	18	0.1944
	3	4	18.0278	0.1941
	4	4	18.0278	0.2219
	4	4	18.0278	0.2219
	5	4	18.0278	0.2496
	5	4	18.0278	0.2496
	4	4	18.0278	0.2219
	4	4	18.0278	0.2219
	4	4	18	0.2222
	5	5	18.0278	0.2774
	4	4	18	0.2222
	4	4	18.0278	0.2219
	4	5	18.0278	0.2496
	4	4	18.0278	0.2219
	4	4	18	0.2222
	4	4	18.0278	0.2219
	4	4	18.0278	0.2219
	4	4	18.0278	0.2219
	4	4	18.0278	0.2219
	4	4	17.0294	0.2349
	4	4.1231	18	0.2256
	5	4	18.0278	0.2496
	4	4	18	0.2222
	5.099	4	18.0278	0.2524
	4	4	18.0278	0.2219
	4.1231	4.1231	18.0278	0.2287
	4	4.1231	18.0278	0.2253
	5	4	18.0278	0.2496
	4	4	18.0278	0.2219
	4	4	18.0278	0.2219
	4	4	18.0278	0.2219
	4	4	17	0.2353
	4	4	18.0278	0.2219
	4	4	17.0294	0.2349
	4	4	18.0278	0.2219
	4	4	17	0.2353
	4	4	18	0.2222
	4	5	18.0278	0.2496
	4	4	18	0.2222
	4	4	17.0294	0.2349
	4	4	18.0278	0.2219
	5.099	5	18.0278	0.2801
	4	4	18.0278	0.2219
	5.099	5	18.1108	0.2788
	4	4	18.0278	0.2219
	4	4	18.0278	0.2219
	4	4.1231	18	0.2256
	4	4	18.0278	0.2219
	4	4	18.0278	0.2219
	4	4	17	0.2353
	4	4	18.0278	0.2219
	4	4	18.0278	0.2219
	4	5.099	18.0278	0.2524
	4	4	18	0.2222
	4	4	18.0278	0.2219
	4	4	18	0.2222
	4	4	18.0278	0.2219
	4	4	18.0278	0.2219
	3	3	18	0.1667
	3	3	17	0.1765
	3	3.1623	17	0.1812
	3	3.1623	16	0.1926
	3	3	18	0.1667
	2	3.1623	16	0.1613
	2	3.1623	17	0.1518
	2	3	16	0.1562
	3	2	18.0278	0.1387
	3	2	17	0.1471
	3	2	17.0294	0.1468
	3	2	17	0.1471
	3.1623	2	17.0294	0.1516
	3	2	17	0.1471
	2	3	18	0.1389
	2	3.1623	16.0312	0.161
	2	3	17	0.1471
	3	2	16	0.1562
	3	2	17.0294	0.1468
	3	2.2361	16	0.1636
	2.2361	3	18	0.1454
	2	2	17	0.1176
	3	2	18.0278	0.1387
	2	3	17	0.1471
	4	3	18	0.1944
	4	3	18.0278	0.1941
	4	4.1231	18	0.2256
	3	4	18.0278	0.1941
	5	4	18	0.25
	5	5	18.0278	0.2774
	4	4	18	0.2222
	4	4	17.0294	0.2349
	4	5	18.0278	0.2496
	5.099	4	18.0278	0.2524
	4	4	18.0278	0.2219
	4	4.1231	18.0278	0.2253
	4	4	18	0.2222
	4.1231	4	18.0278	0.2253
	5	5	18.0278	0.2774
	5.099	5	18.1108	0.2788
	4	4	19	0.2105
	5	5	18.0278	0.2774
	5	4	18.0278	0.2496
	5	4	18.1108	0.2485
	4.1231	5	18	0.2534
	5.099	5	18.1108	0.2788
	4	5	18.0278	0.2496
	5.099	5	18.1108	0.2788
	4	4.1231	18	0.2256
	4.1231	4	18.1108	0.2243
	4	5	18.0278	0.2496
	5	4.1231	18.1108	0.2519
	5	4	18.0278	0.2496
	4.1231	4.1231	18.1108	0.2277
	5	5	18.0278	0.2774
	5	5	18.1108	0.2761
	4	5	18.0278	0.2496
	4.1231	4	18.0278	0.2253
	3	3.1623	18.0278	0.1709
	4.1231	3	18.0278	0.1976
	3	3	19	0.1579
	3	3	17	0.1765
	3	3.1623	19	0.1622
	3.1623	3	18	0.1712
	2	3	18.0278	0.1387
	4.1231	3	18.0278	0.1976
	2.2361	2	19	0.1115
	3	3	18	0.1667
	3	3	19.0263	0.1577
	3	4	18.0278	0.1941
	3	3.1623	19.0263	0.1619
	4.1231	3	18	0.1979
	4	4.1231	18.0278	0.2253
	4	4	17.0294	0.2349
	5	5.099	18.0278	0.2801
	5	5	17.0294	0.2936
	5	5.099	18.0278	0.2801
	5	5	18.1108	0.2761
	5.099	4	18.1108	0.2512
	5	5	17.1172	0.2921
	5.099	5	19.0263	0.2654
	5.099	5	18.1108	0.2788
	5	5.099	19.105	0.2643
	5.099	5	18.1108	0.2788
	5	5.099	19.0263	0.2654
	5.099	5	18.1108	0.2788
	5	5.099	19.105	0.2643
	5	5.099	18.1108	0.2788
	5	5.099	18.1108	0.2788
	5	5	18.1108	0.2761
	5.099	5.099	18.1108	0.2815
	5	5.099	18.1108	0.2788
	5.099	5.099	18.1108	0.2815
	5	5	18.1108	0.2761
	5	5.099	19.105	0.2643
	5.099	5	17.1172	0.295
	6	6.0828	19.0263	0.3175
	6.0828	5	18.1108	0.306
	5	5	19.105	0.2617
	6.0828	6	18.0278	0.3351
	5	5.099	19.105	0.2643
	6.0828	5	18.0278	0.3074
	6.0828	5.099	19.105	0.2926
	5	5	18.1108	0.2761
	5	5.099	19.105	0.2643
	5	6	18.1108	0.3037
	5	5.099	19.105	0.2643
	6	6	18.1108	0.3313
	5	5.099	19.105	0.2643
	6	6	18.1108	0.3313
	5	5.099	19.105	0.2643
	6.0828	5	18.0278	0.3074
	5.099	5	19.105	0.2643
	6	5.099	18.0278	0.3078
	5	5.099	19.105	0.2643
	6.0828	6	18.0278	0.3351
	5.099	6	19.105	0.2905
	6.0828	6	18.0278	0.3351
	5.099	5	19.105	0.2643
	6	5	17.1172	0.3213
	6	6.0828	19.105	0.3162
	5	5	17.1172	0.2921
	6	5.099	19.0263	0.2917
	5	5	18.1108	0.2761
	6	6	19.0263	0.3154
	6	6	18.1108	0.3313
	6.0828	5	19.105	0.29
	6	5	18.1108	0.3037
	5	5	19.105	0.2617
	6	6	18.1108	0.3313
	6.0828	5	18.0278	0.3074
	6	5	18.1108	0.3037
	5.099	5.099	18.1108	0.2815
	6	6.0828	18.1108	0.3336
	5.099	5.099	19.105	0.2669
	6	5.099	18.1108	0.3064
	5.099	5.099	19.105	0.2669
	5.099	5	18.0278	0.2801
	5.099	5.099	19.105	0.2669
	5	5.099	18.1108	0.2788
	6	5.099	19.105	0.2905
	5	5	18.1108	0.2761
	6	6.0828	19.105	0.3162
	5.099	5	18.1108	0.2788
	5.099	5.099	19.105	0.2669
	5	5	18.1108	0.2761
	5	5.099	19.105	0.2643
	5.099	5	17.1172	0.295
	5	5.099	19.105	0.2643
	5	5	17.0294	0.2936
	6	6.0828	19.0263	0.3175
	6.0828	6	17.0294	0.3548
	5	5.099	19.0263	0.2654
	6	6	17.0294	0.3523
	4.1231	4	20.0998	0.2021
	4	4	18.1108	0.2209
	4	3.1623	18.0278	0.1986
	3	3	17.0294	0.1762
	3	3	18.0278	0.1664
	4	3.1623	18.0278	0.1986
	3	3	18.0278	0.1664
	3.1623	3	18.0278	0.1709
	2	3	19	0.1316
	3	2	17	0.1471
	3	2.2361	19	0.1378
	3	3	18	0.1667
	4	3	18.0278	0.1941
	3	4	18.0278	0.1941
	3	3.1623	19.105	0.1613
	3	4	18.0278	0.1941
	4.1231	4	19.0263	0.2135
	4	5	17.1172	0.2629
	4.1231	4	19.0263	0.2135
	5.099	4	18.0278	0.2524
	5.099	5	18.1108	0.2788
	4	5.099	18.0278	0.2524
	5.099	5	19.0263	0.2654
	5	5.099	18.0278	0.2801
	5.099	6	19.0263	0.2917
	5	5.099	18.1108	0.2788
	5.099	6.0828	19.0263	0.2939
	5	5.099	18.1108	0.2788
	5.099	6	19.0263	0.2917
	5	5.099	17.1172	0.295
	5	5.099	19.0263	0.2654
	5	5	17.1172	0.2921
	5	5	19.105	0.2617
	5	5	17.1172	0.2921
	4	4.1231	19.0263	0.2135
	5	5	18.1108	0.2761
	5	5.099	19.105	0.2643
	5.099	5	18.0278	0.2801
	5.099	5.099	19.105	0.2669
	5.099	5	18.1108	0.2788
	5.099	5.099	19.105	0.2669
	5	6	18.1108	0.3037
	5.099	5.099	18.1108	0.2815
	5	5.099	18.0278	0.2801
	5.099	5	19.105	0.2643
	5	5.099	18.0278	0.2801
	5.099	5.099	19.105	0.2669
	6	6.0828	18.0278	0.3351
	5.099	5.099	18.1108	0.2815
	5	5.099	18.1108	0.2788
	5.099	5.099	19.105	0.2669
	6	6	18.0278	0.3328
	5.099	5.099	19.105	0.2669
	6	6.0828	18.1108	0.3336
	5.099	5	19.105	0.2643
	6	6.0828	18.0278	0.3351
	6.0828	6	19.105	0.3162
	5	5.099	18.0278	0.2801
	5	6.0828	18.1108	0.306
	5	5.099	18.0278	0.2801
	6.0828	6.0828	18.1108	0.3359
	5	5	18.0278	0.2774
	5.099	6.0828	19.105	0.2926
	5	5.099	18.0278	0.2801
	6.0828	6.0828	18.1108	0.3359
	5.099	5	18.1108	0.2788
	5.099	5.099	18.1108	0.2815
	5	5	18.0278	0.2774
	5	5.099	19.105	0.2643
	5	5	18.0278	0.2774
	5.099	5.099	19.105	0.2669
	5	5.099	18.0278	0.2801
	5.099	5.099	19.105	0.2669
	6	5	18.0278	0.3051
	5.099	5.099	18.1108	0.2815
	5.099	5	18.0278	0.2801
	5.099	5.099	19.105	0.2669
	5	5.099	18.0278	0.2801
	5.099	5.099	18.1108	0.2815
	5	5.099	18.0278	0.2801
	5.099	5	18.1108	0.2788
	6	5.099	18.0278	0.3078
	5	5.099	19.105	0.2643
	5	5	18.0278	0.2774
	5	5.099	19.105	0.2643
	5	5	18.1108	0.2761
	5	5.099	19.105	0.2643
	5	5	18.1108	0.2761
	5	5.099	19.0263	0.2654
	5	5	18.1108	0.2761
	5	4.1231	19.105	0.2388
	5	4	18.0278	0.2496
	5	5.099	19.105	0.2643
	4	5	18.0278	0.2496
	5	5.099	19.105	0.2643
	4	4	17.0294	0.2349
	4	4.1231	19.0263	0.2135
	5	5	18.0278	0.2774
	5	4.1231	19.105	0.2388
	5	5	17.1172	0.2921
	5	5.099	19.105	0.2643
	4	5	18.0278	0.2496
	5	5.099	19.105	0.2643
	5	4	18.0278	0.2496
	4	5.099	19.105	0.2381
	5	5	18.1108	0.2761
	5	5.099	19.105	0.2643
	5	5	18.1108	0.2761
	5.099	5.099	19.0263	0.268
	5.099	4	18.1108	0.2512
	5.099	5.099	18.2483	0.2794
	5	5.099	18.1108	0.2788
	5.099	5	18.1108	0.2788
	5.099	4.1231	18.1108	0.2546
	5.099	5.099	18.1108	0.2815
	5	4	18.1108	0.2485
	5.099	5.099	18.1108	0.2815
	6	5	18.1108	0.3037
	5.099	5	18.1108	0.2788
	6	5.099	18.1108	0.3064
	5.099	5	18.1108	0.2788
	5	5.099	18.1108	0.2788
	4.1231	4	19.105	0.2126
	5.099	5	18.0278	0.2801
	5.099	5	19.105	0.2643
	5.099	4	18.1108	0.2512
	5.099	5	18.1108	0.2788
	5.099	4	18.1108	0.2512
	5.099	4	18.1108	0.2512
	5.099	4	18.1108	0.2512
	4	4.1231	19.105	0.2126
	5.099	5	19.0263	0.2654
	5	5	18.1108	0.2761
	5	5	18.1108	0.2761
	5	5.099	19.105	0.2643
	5	4	18.1108	0.2485
	4	4.1231	19.105	0.2126
	5.099	4	18.1108	0.2512
	4	4	19.105	0.2094
	5	4	17.1172	0.2629
	4.1231	5	19.0263	0.2397
	4.1231	4	17.1172	0.2373
	4.1231	4	18.0278	0.2253
	4	4	18.1108	0.2209
	4.1231	4.1231	18.1108	0.2277
	5	4	18.1108	0.2485
	5.099	4	18.1108	0.2512
	4	4	18.1108	0.2209
	4.1231	4	18.1108	0.2243
	5	5	18.0278	0.2774
	4	4	18.1108	0.2209
	4	4	17.1172	0.2337
	4	4.1231	18.1108	0.2243
	5.099	4.1231	18.0278	0.2558
	4	5.099	19.105	0.2381
	5	5	18.1108	0.2761
	4.1231	4	19.105	0.2126
	5	5	18.0278	0.2774
	5	5.099	18.1108	0.2788
	5	5.099	18.1108	0.2788
	4	4.1231	18.1108	0.2243
	5	5.099	18.0278	0.2801
	4.1231	5	19.105	0.2388
	4	4	19.105	0.2094
	5.099	5	19.105	0.2643
	4	4.1231	19.105	0.2126
	4	4.1231	19.105	0.2126
	4.1231	4	18.1108	0.2243
	5.099	5.099	19.105	0.2669
	5.099	5	18.1108	0.2788
	5.099	5	19.105	0.2643
	5	5.099	18.1108	0.2788
	5.099	4	19.105	0.2381
	5.099	5	18.1108	0.2788
	4	4.1231	19.0263	0.2135
	4.1231	4	18.1108	0.2243
	4	4.1231	19.105	0.2126
	4	4	18.0278	0.2219
	4	4.1231	19.105	0.2126
	4	4	18.0278	0.2219
	4	4	19.0263	0.2102
	4	4	18.1108	0.2209
	4.1231	4.1231	19.0263	0.2167
	3	3	18.1108	0.1656
	4.1231	4	19.0263	0.2135
	4	4	18.1108	0.2209
	4	4.1231	19.105	0.2126
	5	4	18.1108	0.2485
	4	4.1231	19.105	0.2126
	4	4	18.1108	0.2209
	4	4.1231	19.0263	0.2135
	4.1231	4	18.0278	0.2253
	4.1231	4.1231	19.0263	0.2167
	5	4	18.1108	0.2485
	4	4.1231	19.0263	0.2135
	5	4	18.1108	0.2485
	4	4.1231	19.0263	0.2135
	4	4	18.1108	0.2209
	4	4.1231	19.105	0.2126
	4	4	18.1108	0.2209
	4	4.1231	19.0263	0.2135
	4	4	18.1108	0.2209
	4	4.1231	18.1108	0.2243
	4	4	18.0278	0.2219
	4	4	18.1108	0.2209
	4	4	18.0278	0.2219
	3	3.1623	18.1108	0.1701
	4	4	18.0278	0.2219
	4	4.1231	19.0263	0.2135
	4.1231	4	18.1108	0.2243
	4.1231	3.1623	19.105	0.1907
	4	4	18.1108	0.2209
	3.1623	3	19.105	0.1613
	4	4	17.0294	0.2349
	4.1231	5.099	19.105	0.2414
	4	4	17.0294	0.2349
	4	4.1231	19.0263	0.2135
	3.1623	3	18.1108	0.1701
	3.1623	3	19.105	0.1613
	3	3	17.1172	0.1753
	4	4.1231	19.105	0.2126
	4	4	17.0294	0.2349
	3.1623	4	19.105	0.1874
	4	4	18.1108	0.2209
	4.1231	4	19.105	0.2126
	5	4	18.1108	0.2485
	4.1231	4	19.0263	0.2135
	4	4	18.1108	0.2209
	4.1231	4	19.0263	0.2135
	4	4	18.1108	0.2209
	4.1231	4	19.0263	0.2135
	4	4	18.0278	0.2219
	4	4	19.0263	0.2102
	4	4	18.0278	0.2219
	4.1231	4	19.0263	0.2135
	4	4	19.105	0.2094
	4	5	19.105	0.2355
	4.1231	4.1231	18.1108	0.2277
	4	4	19.105	0.2094
	4	4.1231	18.0278	0.2253
	4	4	19.105	0.2094
	5.099	5.099	18.1108	0.2815
	3	4	19.105	0.1832
	4.1231	4.1231	18.0278	0.2287
	4	5.099	18.1108	0.2512
	4	5.099	18.0278	0.2524
	3	4.1231	18.1108	0.1967
	5	4.1231	18.1108	0.2519
	4	4.1231	19.0263	0.2135
	4.1231	4	18.1108	0.2243
	5	5.099	19.0263	0.2654
	5.099	5	18.0278	0.2801
	4	4.1231	19.0263	0.2135
	4	4.1231	18.1108	0.2243
	3	3.1623	18.1108	0.1701
	5.099	3	18.1108	0.2236
	4	4.1231	18.1108	0.2243
	4.1231	4.1231	18.0278	0.2287
	3	3	18.1108	0.1656
	3	3	18.1108	0.1656
	4	4	18.0278	0.2219
	4	4	18.1108	0.2209
	4.1231	4.1231	19.105	0.2158
	4	4	17.0294	0.2349
	4	4.1231	19.105	0.2126
	4	4	18.0278	0.2219
	4	4.1231	19.105	0.2126
	4	4	17.0294	0.2349
	4	4.1231	19.105	0.2126
	4	4	18.0278	0.2219
	4	4	18.0278	0.2219
	3	3	18.1108	0.1656
	4	4	18.0278	0.2219
	4	4	18.0278	0.2219
	4	4	18.0278	0.2219
	4.1231	4	18.0278	0.2253
	4	4	19.0263	0.2102
	3.1623	3	18.0278	0.1709
	3.1623	3.1623	19.0263	0.1662
	4	4	18.0278	0.2219
	3.1623	3.1623	19.105	0.1655
	4	4	18.0278	0.2219
	4.1231	3.1623	19.105	0.1907
	4	4	18.0278	0.2219
	3.1623	3	19.105	0.1613
	4	4	18.0278	0.2219
	4.1231	4	19.0263	0.2135
	4	4	18.0278	0.2219
	4	4	18.0278	0.2219
	4	4	18.0278	0.2219
	4	4	18.0278	0.2219
	4	3	18.0278	0.1941
	4	4	19.0263	0.2102
	4	4	18.0278	0.2219
	3	4	18.1108	0.1933
	4.1231	4	18.0278	0.2253
	3.1623	3.1623	19.105	0.1655
	4	4	18.0278	0.2219
	4	4	18.1108	0.2209
	4.1231	4	18.1108	0.2243
	4.1231	4	19.105	0.2126
	5.099	5.099	18.1108	0.2815
	4	4	18.0278	0.2219
	4	4	18.1108	0.2209
	4	4	18.1108	0.2209
	5.099	4	18.1108	0.2512
	4.1231	4	18.1108	0.2243
	5.099	4.1231	18.0278	0.2558
	4	4.1231	18.1108	0.2243
	5	4	18.1108	0.2485
	4	4	18.1108	0.2209
	4	4	18.0278	0.2219
	3	4.1231	19.105	0.1864
	4	4	18.1108	0.2209
	4	4.1231	18.1108	0.2243
	5	5	18.1108	0.2761
	4	5.099	19.105	0.2381
	5.099	4	18.0278	0.2524
	4	4.1231	19.105	0.2126
	5	4	18.0278	0.2496
	4	5.099	19.105	0.2381
	5.099	4	18.0278	0.2524
	4	4.1231	19.105	0.2126
	5	5	18.0278	0.2774
	5	5.099	19.105	0.2643
	5	5	19.0263	0.2628
	5	5.099	19.105	0.2643
	5	5	17.0294	0.2936
	4.1231	4	19.105	0.2126
	5	5	17.1172	0.2921
	4	4.1231	19.0263	0.2135
	4	4	18.0278	0.2219
	3	3	18.0278	0.1664
	2	3.1623	17	0.1518
	3	3	18.0278	0.1664
	3	3	17	0.1765
	2	3	18	0.1389
	3	3.1623	18	0.1712
	3	3	18.0278	0.1664
	3	3	17.0294	0.1762
	3	3	18.0278	0.1664
	3	3.1623	18.0278	0.1709
	3	2	18.0278	0.1387
	2	3	17	0.1471
	3	3	18.0278	0.1664
	3	3	17	0.1765
	3	3	18.0278	0.1664
	3	3	17	0.1765
	2.2361	3	18	0.1454
	3	3	17	0.1765
	2.2361	2	18	0.1177
	3	2	18	0.1389
	3.1623	2	19	0.1358
	2	3	17	0.1471
	2	3	18	0.1389
	3	2	17	0.1471
	3	3	18	0.1667
	3	3	18	0.1667
	3	2.2361	19.0263	0.1376
	4	3	18.0278	0.1941
	4.1231	3.1623	19.105	0.1907
	3	4.1231	18.0278	0.1976
	3	3	18.0278	0.1664
	4	3	18	0.1944
	4	3.1623	19.0263	0.1882
	5	4	18.1108	0.2485
	3	4.1231	19.105	0.1864
	4	4	18.1108	0.2209
	4	4.1231	19.105	0.2126
	5	5	18.1108	0.2761
	4	4	18.0278	0.2219
	5	5	17.1172	0.2921
	4	4.1231	19.0263	0.2135
	5	5	18.1108	0.2761
	4	4.1231	19.105	0.2126
	5	5	17.1172	0.2921
	5.099	4.1231	19.0263	0.2424
	4	4	18.0278	0.2219
	4.1231	4	18.0278	0.2253
	4	4	17.0294	0.2349
	4	4	19.0263	0.2102
	4.1231	4	18.0278	0.2253
	4.1231	4	18.0278	0.2253
	4.1231	4	17.0294	0.2385
	4	4.1231	19.0263	0.2135
	4.1231	4	17.0294	0.2385
	4.1231	4	19.0263	0.2135
	4.1231	4	17.0294	0.2385
	4.1231	4	18.0278	0.2253
	4	4	17.0294	0.2349
	4.1231	4.1231	18.0278	0.2287
	4.1231	4	18.1108	0.2243
	5.099	5	18.0278	0.2801
	5.099	4	18.0278	0.2524
	5.099	4	18.0278	0.2524
	5.099	4	18.0278	0.2524
	5.099	4	18.0278	0.2524
	5.099	4.1231	18.0278	0.2558
	5.099	4	19.105	0.2381
	5.099	4	18.0278	0.2524
	5.099	5.099	18.1108	0.2815
	5.099	4	17.0294	0.2672
	5.099	5	18.1108	0.2788
	5	5	17.0294	0.2936
	5	5.099	18.1108	0.2788
	5	5	18.0278	0.2774
	5	5.099	19.105	0.2643
	5	5	18.0278	0.2774
	5.099	5.099	18.1108	0.2815
	5	4	18.0278	0.2496
	5.099	5	18.1108	0.2788
	5	4.1231	18.0278	0.253
	5.099	5	18.1108	0.2788
	5.099	4	17.0294	0.2672
	5	5.099	19.105	0.2643
	5	5	17.0294	0.2936
	5.099	5.099	19.105	0.2669
	5	5	17.1172	0.2921
	5	5	19.105	0.2617
	5	5	18.1108	0.2761
	4	4.1231	18.1108	0.2243
	5	5.099	18.1108	0.2788
	5.099	5.099	18.1108	0.2815
	5	5.099	18.0278	0.2801
	5.099	5.099	19.105	0.2669
	5.099	5	18.0278	0.2801
	5	5.099	19.0263	0.2654
	5	5.099	18.0278	0.2801
	5	5.099	19.105	0.2643
	5	5.099	18.1108	0.2788
	5	5.099	19.105	0.2643
	5	5.099	18.0278	0.2801
	5	5.099	18.1108	0.2788
	5	5.099	18.0278	0.2801
	5	5.099	18.1108	0.2788
	5.099	5	18.0278	0.2801
	5	5.099	18.1108	0.2788
	5.099	5	18.0278	0.2801
	5	5.099	18.1108	0.2788
	5.099	5	18.0278	0.2801
	5	5.099	19.0263	0.2654
	5.099	5	18.0278	0.2801
	5	5.099	19.105	0.2643
	6	6	18.1108	0.3313
	5	5.099	19.0263	0.2654
	5	5	18.1108	0.2761
	5	5.099	19.0263	0.2654
	5	4	18.1108	0.2485
	5	5.099	19.0263	0.2654
	5	4	18.1108	0.2485
	5	5.099	19.0263	0.2654
	4	4	17.1172	0.2337
	5.099	5.099	19.0263	0.268
	5	5	19.105	0.2617
	5	5.099	19.0263	0.2654
	5	5	17.0294	0.2936
	5.099	5	19.0263	0.2654
	5	5.099	18.0278	0.2801
	5.099	5	19.0263	0.2654
	5	5	18.0278	0.2774
	5.099	5	19.105	0.2643
	5	5.099	18.0278	0.2801
	5.099	5	19.0263	0.2654
	5	5	18.0278	0.2774
	5	5	19.0263	0.2628
	5	5	18.0278	0.2774
	5.099	5	19.0263	0.2654
	5	5.099	18.1108	0.2788
	5.099	5	19.0263	0.2654
	5	5.099	18.1108	0.2788
	5.099	5	19.105	0.2643
	5	5.099	18.1108	0.2788
	5.099	5	19.0263	0.2654
[truncated: 20,213 more rows]

## Sheet: eyeblink8-3
	A	B	C	D
	5	5	16	0.3125
	5	5	16.1245	0.3101
	5	5	16	0.3125
	5.099	5.099	16.1245	0.3162
	5	6.0828	16.0312	0.3457
	6.0828	5.099	16.1245	0.3467
	5	5	16.0312	0.3119
	6.0828	5.099	16.1245	0.3467
	5	5	16.0312	0.3119
	6.0828	5	16.1245	0.3437
	5	5	16	0.3125
	6	6	16.0312	0.3743
	6	5	16	0.3438
	5	5	16.0312	0.3119
	5	5	16	0.3125
	5	5	16.0312	0.3119
	5	5	16	0.3125
	6	6	16.0312	0.3743
	5	6	16.0312	0.3431
	5	5	16.1245	0.3101
	5	6	15.0333	0.3659
	5	5	16.1245	0.3101
	5	5	16	0.3125
	5	5	16.1245	0.3101
	5	5.099	16	0.3156
	5	5.099	16.1245	0.3132
	5	5.099	15	0.3366
	5	5	16.0312	0.3119
	5	5.099	16	0.3156
	5	5	16.0312	0.3119
	5	6	16.0312	0.3431
	5	5.099	16.1245	0.3132
	5	6.0828	16.0312	0.3457
	5	5	16.1245	0.3101
	5	5	16	0.3125
	5	5.099	16.0312	0.315
	5	5	16	0.3125
	5	6	16.0312	0.3431
	5	5	16	0.3125
	5	5.099	16.0312	0.315
	5	5	16	0.3125
	6	6	16.0312	0.3743
	5	5	16	0.3125
	6	6.0828	16.0312	0.3769
	5	5	16	0.3125
	5	5	16.1245	0.3101
	5	5	16.0312	0.3119
	5	5	16.1245	0.3101
	5	5	17.0294	0.2936
	5	5.099	16.1245	0.3132
	5	5	16	0.3125
	5	5.099	16.0312	0.315
	5	5	15	0.3333
	5	5.099	16.0312	0.315
	5	5	16	0.3125
	5	5.099	16.1245	0.3132
	5	5	16	0.3125
	5	5.099	16.0312	0.315
	5	6.0828	16.0312	0.3457
	5	5.099	16.1245	0.3132
	5	5	16	0.3125
	5	5.099	16.0312	0.315
	5.099	5.099	16.0312	0.3181
	5.099	5.099	16.1245	0.3162
	5	5	16.0312	0.3119
	5.099	5.099	16.0312	0.3181
	5	5	16	0.3125
	6.0828	5	16.0312	0.3457
	5	5	16	0.3125
	6.0828	6.0828	16.0312	0.3794
	5	5	16	0.3125
	5.099	4.1231	16.0312	0.2876
	5	5	16	0.3125
	5.099	5.099	16.0312	0.3181
	5	5	16	0.3125
	5.099	5.099	16.0312	0.3181
	5	5	16	0.3125
	5.099	5.099	16.1245	0.3162
	5	5	16	0.3125
	5.099	5.099	16.0312	0.3181
	5	5	16	0.3125
	5.099	5	15.0333	0.3359
	5	5	16	0.3125
	5.099	5	16.1245	0.3132
	4	5	16	0.2812
	5.099	6	16.0312	0.3462
	5	5	16.0312	0.3119
	5	5	16.0312	0.3119
	5	5	16	0.3125
	5.099	5.099	16.0312	0.3181
	5	5	16	0.3125
	5	5.099	16.1245	0.3132
	5	5	16	0.3125
	5	5.099	16.0312	0.315
	5	5	16	0.3125
	5	5.099	16.0312	0.315
	5	6	16.0312	0.3431
	5	5	16.0312	0.3119
	5	5	16	0.3125
	6	6.0828	16.0312	0.3769
	5	5	16	0.3125
	5	5	16.0312	0.3119
	5	5	16	0.3125
	5	5.099	16.0312	0.315
	5	5	16.0312	0.3119
	5	5	16.0312	0.3119
	5	5	16	0.3125
	5	5	16.0312	0.3119
	5	5	16	0.3125
	5	5.099	16.0312	0.315
	5	5	16	0.3125
	6	6	16.0312	0.3743
	4	5	16	0.2812
	5.099	5	15.0333	0.3359
	5	5	16	0.3125
	5	5	16.0312	0.3119
	5	5	16	0.3125
	5	5.099	16.0312	0.315
	5	5	16	0.3125
	5.099	5.099	16.0312	0.3181
	5	5	16	0.3125
	5.099	5.099	16.0312	0.3181
	5	5.099	16	0.3156
	5	5.099	15.0333	0.3359
	4	5	16	0.2812
	5.099	5	15.0333	0.3359
	5	5	16	0.3125
	5.099	5	16.0312	0.315
	5	5	16	0.3125
	5	5	15.0333	0.3326
	6	5	16	0.3438
	5	5	16.0312	0.3119
	5.099	5	16	0.3156
	5	5	16.0312	0.3119
	4	4	16	0.25
	4	4.1231	16.0312	0.2534
	4	4	15.0333	0.2661
	4.1231	4.1231	15.0333	0.2743
	4	4	15	0.2667
	4	4.1231	16.0312	0.2534
	4	4	16	0.25
	4	4.1231	16.0312	0.2534
	4	5	16	0.2812
	4	4	16.0312	0.2495
	4	4	15	0.2667
	4	5	16.0312	0.2807
	4	5	16	0.2812
	4	4	16.0312	0.2495
	4	4	15	0.2667
	4	4	15.0333	0.2661
	4	4.1231	16	0.2538
	4	4	15.0333	0.2661
	5	4	16	0.2812
	5	4	15.0333	0.2993
	5	5	16	0.3125
	4.1231	4	16.0312	0.2534
	5	5	16	0.3125
	4	4	16.0312	0.2495
	5	4	16	0.2812
	5	5	16.0312	0.3119
	5	5	16	0.3125
	5	5.099	16.0312	0.315
	5	5	16	0.3125
	5	5.099	16.0312	0.315
	4	4	15	0.2667
	4	4.1231	16.0312	0.2534
	5	4	15	0.3
	5	5	15.0333	0.3326
	5	4	16	0.2812
	4.1231	4	15.0333	0.2702
	6	5.099	16	0.3468
	5	5	16.0312	0.3119
	5	5	16	0.3125
	5	5.099	16.1245	0.3132
	5	5	16	0.3125
	4	4.1231	16.0312	0.2534
	5	5	16	0.3125
	5.099	5	16.1245	0.3132
	5	5	15	0.3333
	5.099	5	15.0333	0.3359
	5	5	17	0.2941
	5.099	5	15.1327	0.3337
	5	4	16	0.2812
	4.1231	4	16.0312	0.2534
	5	5	16.0312	0.3119
	5	5	16.0312	0.3119
	5	5.099	16	0.3156
	5.099	4	15.0333	0.3026
	5.099	4	16.0312	0.2838
	5	5.099	16.0312	0.315
	5	4	16.0312	0.2807
	5	5.099	16.0312	0.315
	5	4	16.0312	0.2807
	5	5.099	16.0312	0.315
	5.099	5	16	0.3156
	5	5	16.0312	0.3119
	5	5.099	16	0.3156
	5	5	16.0312	0.3119
	5	5	16	0.3125
	5.099	5	16.0312	0.315
	5	5	15	0.3333
	5	5	16.0312	0.3119
	4.1231	5	16	0.2851
	5	5	16.0312	0.3119
	5	5	16	0.3125
	5.099	5	16.0312	0.315
	5	5	16	0.3125
	5	5.099	15.0333	0.3359
	5	5	15	0.3333
	5	5	16.0312	0.3119
	5	5	15	0.3333
	5	5	16.0312	0.3119
	5	5	16	0.3125
	5.099	5	15.1327	0.3337
	5	5.099	15	0.3366
	5.099	5	15.0333	0.3359
	5	5	16	0.3125
	5.099	5.099	16.0312	0.3181
	5	5	15.0333	0.3326
	5.099	5.099	16.0312	0.3181
	5	5	15	0.3333
	5	5.099	16.0312	0.315
	5	5.099	15	0.3366
	5	5	15.0333	0.3326
	5	5	15	0.3333
	5	5.099	16	0.3156
	5	5.099	15	0.3366
	4.1231	5.099	16.0312	0.2876
	5	5.099	15.0333	0.3359
	5	5.099	16.0312	0.315
	6	5	15	0.3667
	6	6.0828	16.0312	0.3769
	5	5.099	15	0.3366
	6	6.0828	16.0312	0.3769
	5	5	15	0.3333
	5.099	5	16.0312	0.315
	4	5.099	15	0.3033
	5.099	5	15.0333	0.3359
	5	5	16	0.3125
	5.099	5	16.0312	0.315
	5	5.099	15	0.3366
	5	5	16	0.3125
	4.1231	4	16.0312	0.2534
	4	4.1231	15.0333	0.2702
	5.099	4	16	0.2843
	4.1231	4	15.0333	0.2702
	5.099	4	15	0.3033
	4	4	15.0333	0.2661
	5.099	4	15	0.3033
	5	4	16.0312	0.2807
	5.099	5.099	16	0.3187
	5	4	15.0333	0.2993
	5	4	16	0.2812
	5	5	15.0333	0.3326
	4.1231	5	15.0333	0.3034
	5	5.099	15.0333	0.3359
	5.099	5	16.0312	0.315
	5	5	16	0.3125
	4	4	16.0312	0.2495
	5	5	15.0333	0.3326
	5	4	16	0.2812
	5	4	15.0333	0.2993
	5	4.1231	16	0.2851
	5.099	5	15	0.3366
	5	4.1231	16	0.2851
	5.099	5	15.0333	0.3359
	5	4	16	0.2812
	5	5	15.0333	0.3326
	4	4.1231	16	0.2538
	5	5	15.0333	0.3326
	5	5	16	0.3125
	5	5	15.0333	0.3326
	5	4.1231	16	0.2851
	5	5.099	15.0333	0.3359
	5	4.1231	16	0.2851
	5.099	4	15.0333	0.3026
	5	5	16	0.3125
	5	4	15.0333	0.2993
	5	5	16	0.3125
	5	4	15.0333	0.2993
	5	5	16	0.3125
	5.099	4	15.0333	0.3026
	5	4	16	0.2812
	5	4	15.0333	0.2993
	5	4	16	0.2812
	4.1231	4	15.0333	0.2702
	5	4	16	0.2812
	5.099	4	15.0333	0.3026
	5	4	16	0.2812
	5	5	16.0312	0.3119
	4	5	15.0333	0.2993
	5.099	5	15.0333	0.3359
	5.099	5	16.0312	0.315
	5	5	16.0312	0.3119
	5.099	4	16	0.2843
	5	5	15.0333	0.3326
	5.099	4	16	0.2843
	5	5.099	15.0333	0.3359
	5.099	4	16	0.2843
	5	5.099	15.0333	0.3359
	5	4.1231	16	0.2851
	5	5.099	15.0333	0.3359
	5	4.1231	16	0.2851
	5	4	15.0333	0.2993
	5	4.1231	16	0.2851
	4	4.1231	15.0333	0.2702
	5	5.099	16	0.3156
	5	4.1231	15.0333	0.3034
	3	4	15	0.2333
	4	4	14	0.2857
	3	3	15	0.2
	2	3	14	0.1786
	3	3	16.0312	0.1871
	3	4	14	0.25
	3.1623	3	15	0.2054
	4.1231	3	15	0.2374
	3	4	15.0333	0.2328
	3	4	14	0.25
	4	4	15	0.2667
	4	3	15	0.2333
	3	4	15.0333	0.2328
	4	4	15	0.2667
	4.1231	3	15	0.2374
	4	4	15	0.2667
	4	4	16	0.25
	4	3	15	0.2333
	4	4	16	0.25
	4	4	15	0.2667
	4	4	15	0.2667
	4	3	14	0.25
	5	4	16	0.2812
	4	4	14	0.2857
	4	4	16	0.25
	5	4	14.0357	0.3206
	4	4	16	0.25
	4.1231	4	15.0333	0.2702
	4	4.1231	16	0.2538
	4	4	15.0333	0.2661
	4	4	16	0.25
	5	4	15.0333	0.2993
	4	4	16	0.25
	4.1231	4	15.0333	0.2702
	4	4	16	0.25
	5.099	4	15.0333	0.3026
	4	4	16	0.25
	4	4	15.0333	0.2661
	4	4	16	0.25
	4	4	15	0.2667
	4	4	16	0.25
	4	4	15.0333	0.2661
	4	4	16	0.25
	5	4	15.0333	0.2993
	4	4	16	0.25
	4.1231	3	15.0333	0.2369
	4	4	16	0.25
	5	4	15.0333	0.2993
	5	4	16	0.2812
	4	4	15	0.2667
	4	4	16	0.25
	4.1231	4	15	0.2708
	5	4	16	0.2812
	4	4	15.0333	0.2661
	5	4	16	0.2812
	5.099	4	15.0333	0.3026
	4	4	16	0.25
	4.1231	4	15.0333	0.2702
	5	4	16	0.2812
	5.099	4	15.0333	0.3026
	5	4	16	0.2812
	4	4	15.0333	0.2661
	4	4	16	0.25
	4	4	15.0333	0.2661
	5	4	16	0.2812
	5.099	4	15.0333	0.3026
	4	4	16	0.25
	4.1231	3	15.0333	0.2369
	4	4	16	0.25
	5.099	4	15.0333	0.3026
	5	4	16	0.2812
	5.099	4	15.0333	0.3026
	4	4	16	0.25
	4	4	15.0333	0.2661
	4	4.1231	16	0.2538
	4	4	15.0333	0.2661
	5	4	16	0.2812
	4.1231	4	15.0333	0.2702
	4.1231	4	15.0333	0.2702
	4	4	15	0.2667
	4	5	15	0.3
	5	5.099	15.0333	0.3359
	5	5.099	15.0333	0.3359
	5	5.099	15.0333	0.3359
	6.0828	5.099	15	0.3727
	5	5.099	15.0333	0.3359
	5	6	16	0.3438
	6.0828	6	16.0312	0.3769
	5	6	15	0.3667
	6	6.0828	16.0312	0.3769
	5	6	16	0.3438
	6	6.0828	16.0312	0.3769
	5	6	15	0.3667
	6	6	15.0333	0.3991
	5	5	16.0312	0.3119
	6	6	15.0333	0.3991
	5	6	16.0312	0.3431
	6	6	15.0333	0.3991
	5	5	16.0312	0.3119
	6	6	15.0333	0.3991
	6	6	16.0312	0.3743
	6.0828	5	16.0312	0.3457
	6.0828	6.0828	16.0312	0.3794
	6	5	15.0333	0.3659
	6.0828	6.0828	16.0312	0.3794
	6	5	16.0312	0.3431
	5.099	6.0828	15	0.3727
	6.0828	6	16.0312	0.3769
	6.0828	6.0828	16	0.3802
	6.0828	6.0828	16.0312	0.3794
	6	6	16.0312	0.3743
	6.0828	6.0828	16.0312	0.3794
	6	6	16.0312	0.3743
	6	5.099	16.0312	0.3462
	6.0828	6.0828	15	0.4055
	6	5	16.0312	0.3431
	5.099	6.0828	15	0.3727
	6.0828	5.099	16.0312	0.3488
	5.099	6.0828	16	0.3494
	6	6	15.0333	0.3991
	6	6	16	0.375
	6	6	16.0312	0.3743
	5	5	16	0.3125
	6	6	15.0333	0.3991
	6	6	15.0333	0.3991
	6.0828	6	15	0.4028
	6.0828	6.0828	15	0.4055
	6.0828	5.099	16.0312	0.3488
	6	6	16.0312	0.3743
	6	5.099	15	0.37
	6.0828	6.0828	15.0333	0.4046
	6.0828	6.0828	16.0312	0.3794
	5	6	16	0.3438
	6	5.099	16.0312	0.3462
	6	6	16	0.375
	6	5.099	16	0.3468
	5	5	15.0333	0.3326
	6	6	15.0333	0.3991
	5	6	15	0.3667
	5	5	15.0333	0.3326
	6	6	16	0.375
	6.0828	5	16	0.3463
	6	6	16	0.375
	6	5.099	16	0.3468
	5	6	15	0.3667
	6	6.0828	16.0312	0.3769
	6	6	15	0.4
	6	6	15.0333	0.3991
	5	6	16	0.3438
	6.0828	5	15	0.3694
	5	5	16	0.3125
	6	6.0828	16.0312	0.3769
	5	6	15	0.3667
	6	5	16.0312	0.3431
	5	5	15	0.3333
	6	6	15	0.4
	6	6	16	0.375
	6.0828	5	16	0.3463
	5	6	16	0.3438
	6	6	15.0333	0.3991
	5	6.0828	16	0.3463
	6	6	15.0333	0.3991
	5	6	15	0.3667
	6	6.0828	16.0312	0.3769
	5	6	15	0.3667
	6	5.099	15	0.37
	5	6	16.0312	0.3431
	6	5	16.0312	0.3431
	6	6	16.0312	0.3743
	6	6	15	0.4
	5	6	15.0333	0.3659
	6	5	15	0.3667
	5	5	15.0333	0.3326
	5	5	15.0333	0.3326
	3	3	14.0357	0.2137
	3	4	14.0357	0.2494
	3.1623	3	14.0357	0.2195
	3	3	14	0.2143
	3	4	14.1421	0.2475
	4.1231	3.1623	15.0333	0.2423
	3	4.1231	15.0333	0.2369
	4	4	14.0357	0.285
	4	4	15.0333	0.2661
	4	3.1623	14	0.2558
	4	4	14.0357	0.285
	4	4	14	0.2857
	4	4	15	0.2667
	5	4	15	0.3
	5	4	15.0333	0.2993
	5	4	15	0.3
	5	5.099	15.0333	0.3359
	5	5	14	0.3571
	5.099	5	14	0.3607
	5	5.099	15	0.3366
	5	5	15	0.3333
	5	5	15	0.3333
	5	5	15.0333	0.3326
	5	5	15.0333	0.3326
	5	4	15	0.3
	5	5	15	0.3333
	5	5	15	0.3333
	5	5	15	0.3333
	6	5	15.0333	0.3659
	5	5	15.0333	0.3326
	6	5	16.0312	0.3431
	5	5.099	15.0333	0.3359
	5	5	15	0.3333
	5	5	14	0.3571
	5	6	15	0.3667
	6	5	16	0.3438
	5	5	15	0.3333
	5	5	15	0.3333
	4	5	15.0333	0.2993
	5	5	15.0333	0.3326
	5	5	15	0.3333
	5	5	16	0.3125
	5	5	15	0.3333
	5	5	15	0.3333
	5	5.099	15.0333	0.3359
	5	5	14	0.3571
	5.099	5	15	0.3366
	5	5	15.0333	0.3326
	5	6.0828	15	0.3694
	5	5	15	0.3333
	5	5	15	0.3333
	6	5	15	0.3667
	5	5	16	0.3125
	6	5	15	0.3667
	6	5	15.0333	0.3659
	5	5	15	0.3333
	5	6	16	0.3438
	5	5	15.0333	0.3326
	5	6	15	0.3667
	6	6	15	0.4
	5	5	15	0.3333
	5	6	15	0.3667
	5	5.099	15.0333	0.3359
	5	5	15	0.3333
	5	5	15.0333	0.3326
	5	5	15.0333	0.3326
	5	5.099	15.0333	0.3359
	5	5	15.0333	0.3326
	5	5	15	0.3333
	6	5	15	0.3667
	5	6	15.0333	0.3659
	5	5	15	0.3333
	5.099	6	16	0.3468
	5	5	16	0.3125
	5.099	6	16	0.3468
	5.099	5	15	0.3366
	5.099	6	16	0.3468
	6	6	15	0.4
	5.099	6	16	0.3468
	6	6.0828	15.0333	0.4019
	5	6	16	0.3438
	6	6	15.0333	0.3991
	5	5	15	0.3333
	5	5	15	0.3333
	6.0828	6	15	0.4028
	6	5.099	14	0.3964
	5	6	16	0.3438
	5	5.099	15	0.3366
	5	5	15	0.3333
	6	6.0828	14	0.4315
	5	5	15	0.3333
	6	6	15.0333	0.3991
	5	6	16	0.3438
	5	5	15.0333	0.3326
	5.099	6	16	0.3468
	5	5.099	15.0333	0.3359
	5	5	15	0.3333
	6	5	15	0.3667
	6	5	16	0.3438
	6	5.099	15	0.37
	6	5	16.0312	0.3431
	5	5	15	0.3333
	5	5	16	0.3125
	6	6	15	0.4
	5	5	16	0.3125
	6.0828	6	15.0333	0.4019
	5	6	15	0.3667
	5.099	6	15	0.37
	5	5	16	0.3125
	6.0828	6	15.0333	0.4019
	5	5	15	0.3333
	6.0828	6	15.0333	0.4019
	5	5	16	0.3125
	6.0828	5	15	0.3694
	5	5	16	0.3125
	6	6	15.0333	0.3991
	5	5	16	0.3125
	6	5	15.0333	0.3659
	5	5	15	0.3333
	6.0828	6	15.0333	0.4019
	5	5	15	0.3333
	6.0828	6	15.0333	0.4019
	5	6	15	0.3667
	6	5	15.0333	0.3659
	5	5	15	0.3333
	6	6	15.0333	0.3991
	5	5	16	0.3125
	6.0828	6	15.0333	0.4019
	5	6	15	0.3667
	6	6	15.0333	0.3991
	6	5	15	0.3667
	6	5	15	0.3667
	5	5	15	0.3333
	6	6	15.0333	0.3991
	6	5	15.0333	0.3659
	6	5	15	0.3667
	5	5	15	0.3333
	6	6	15	0.4
	5	5	15	0.3333
	6	6	15.0333	0.3991
	5	5	15	0.3333
	6	6	15.0333	0.3991
	5	5	16	0.3125
	6	5	15	0.3667
	5	5	16	0.3125
	6	6	15.0333	0.3991
	5	5	16	0.3125
	6	6	15	0.4
	5	5	16	0.3125
	6	5	15	0.3667
	5	5	15	0.3333
	6	5	15	0.3667
	5	6	15	0.3667
	5	5	15	0.3333
	5	6	15	0.3667
	5	5	15	0.3333
	5	6	15	0.3667
	6	5	15.0333	0.3659
	5	5	15	0.3333
	6	5	15	0.3667
	6	5	15	0.3667
	6	5	15	0.3667
	5	6	15	0.3667
	6	6	15.0333	0.3991
	5	6	15	0.3667
	5	6	15.0333	0.3659
	5	6	15	0.3667
	6	6	15.0333	0.3991
	5	6	15	0.3667
	6	6	15.0333	0.3991
	5	6	15	0.3667
	6	6	15	0.4
	5	6	15	0.3667
	6	6	15	0.4
	5	6	15	0.3667
	6	6	15.0333	0.3991
	5	6	15	0.3667
	6	6	15.0333	0.3991
	5	5	15	0.3333
	5	5	15	0.3333
	4	3	14.0357	0.2494
	3	4	14.0357	0.2494
	4	3	14.0357	0.2494
	3	3	14.0357	0.2137
	3	3	15.0333	0.1996
	4	3	14.0357	0.2494
	4	3	14.0357	0.2494
	3	3	14.0357	0.2137
	4	4	15.0333	0.2661
	4	3	14.0357	0.2494
	4	4	15.0333	0.2661
	4	4	15	0.2667
	4	5	15.0333	0.2993
	4	4	15	0.2667
	4	5	15	0.3
	5	5	15	0.3333
	5	5	15	0.3333
	5	5	15.0333	0.3326
	5	4	15	0.3
	5	4	15	0.3
	5	5	15	0.3333
	5	5	15.0333	0.3326
	5	5.099	15	0.3366
	5	5	15	0.3333
	5	5.099	15	0.3366
	5	4	15	0.3
	5	6	15	0.3667
	5	5	15.0333	0.3326
	5	6	15	0.3667
	5	5	15.0333	0.3326
	5	5.099	15	0.3366
	5	6	15.0333	0.3659
	5	5	15	0.3333
	5	5	15	0.3333
	5	5	15	0.3333
	6	5	15	0.3667
	5	6	15	0.3667
	5	5	15.0333	0.3326
	5	6	15	0.3667
	5	5	15	0.3333
	5.099	6	16	0.3468
	5	5.099	16	0.3156
	5	5	15	0.3333
	5	5	15	0.3333
	5	5	15	0.3333
	6	6.0828	16	0.3776
	5	5	15	0.3333
	5	5	15	0.3333
	5	5	16	0.3125
	5	5	15.0333	0.3326
	5	6	16	0.3438
	5	5	15	0.3333
	5.099	6	16	0.3468
	5	5	15	0.3333
	5	5	15	0.3333
	5	5.099	15	0.3366
	5	5	15.0333	0.3326
	6	5.099	14	0.3964
	5	5	15	0.3333
	5	5	16	0.3125
	5	5	16	0.3125
	5	5	15	0.3333
	5	5	16	0.3125
	5	5	15	0.3333
	5	5	15	0.3333
	5	5.099	15	0.3366
	5	5	15	0.3333
	5	5.099	15	0.3366
	5	5	15	0.3333
	6	5.099	15	0.37
	5	5.099	15.0333	0.3359
	6	5	15	0.3667
	5	5	16	0.3125
	5	5	15.0333	0.3326
	5	5	15	0.3333
	5	5	16	0.3125
	5	6	15	0.3667
	5	5	15	0.3333
	5.099	5	16	0.3156
	5	5	15	0.3333
	5	5	16	0.3125
	5	5	15	0.3333
	5.099	5	16	0.3156
	6	6.0828	16.0312	0.3769
	5	5	16	0.3125
	5	5	16.0312	0.3119
	5	5	16	0.3125
	5	5	15	0.3333
	5	6	15	0.3667
	5	5	15	0.3333
	5	6	15	0.3667
	5	5	15	0.3333
	5	5	15	0.3333
	5.099	5	15	0.3366
	5	6	16	0.3438
	5	5	15	0.3333
	5	6	15	0.3667
	5	6	15	0.3667
	5.099	6	16	0.3468
	6.0828	5	16	0.3463
	5.099	6	16	0.3468
	5	5	15	0.3333
	5	6	16	0.3438
	5	5	15	0.3333
	5	6.0828	15	0.3694
	5	5	15	0.3333
	5	6	15	0.3667
	5	5.099	16	0.3156
	5.099	6	16	0.3468
	5.099	5	15	0.3366
	5	6	15	0.3667
	5	5	15	0.3333
	5	6	15	0.3667
	5	5	16.0312	0.3119
	5	6	16	0.3438
	5	5	15	0.3333
	5.099	6	16	0.3468
	6	5	15	0.3667
	5	6	16	0.3438
	6	5	15	0.3667
	5	6	15	0.3667
	5	5.099	16.0312	0.315
	5	5	16	0.3125
	5	6	15.0333	0.3659
	5	5	16	0.3125
	6	6	15.0333	0.3991
	5	6	16	0.3438
	5	5	16	0.3125
	6	5	16.0312	0.3431
	6	5	16	0.3438
	5	6	15	0.3667
	6	5.099	16	0.3468
	5.099	6	16	0.3468
	6	5.099	15	0.37
	5	6	15	0.3667
	5	5.099	15.0333	0.3359
	5	5	15	0.3333
	6	6	15	0.4
	5	6	16	0.3438
	5	6	15	0.3667
	5	5	16	0.3125
	5	5.099	16	0.3156
	5	5	15	0.3333
	5	5	15	0.3333
	5	6	15	0.3667
	5	5.099	16	0.3156
	5	5	16	0.3125
	5	5	16	0.3125
	5.099	5	16	0.3156
	6	6.0828	16.0312	0.3769
	5	6	16	0.3438
	5	5	16.0312	0.3119
	5	6	16	0.3438
	5	5	16.0312	0.3119
	5.099	6	16	0.3468
	5	5.099	16	0.3156
	5	6	16	0.3438
	5	5.099	16	0.3156
	5	6	15	0.3667
	5	5.099	16	0.3156
	5	6	15	0.3667
	5	5.099	15	0.3366
	5	6	15	0.3667
	5	5	15	0.3333
	5	6	15	0.3667
	5	5	16	0.3125
	5	6	15	0.3667
	6	5	15	0.3667
	5	6	16	0.3438
	5	5	16	0.3125
	5	6	16	0.3438
	5.099	5	15	0.3366
	5	6	15	0.3667
	5.099	5	15	0.3366
	5	6	15	0.3667
	5	5	16	0.3125
	5	6	15	0.3667
	5.099	5	15	0.3366
	5	6	16	0.3438
	5	5	16	0.3125
	5	6	16	0.3438
	5	5	15	0.3333
	5	6	15	0.3667
	5	5	15	0.3333
	5	5	15	0.3333
	5	5	15.0333	0.3326
	5	5	15	0.3333
	6.0828	6	15.0333	0.4019
	5	6	15	0.3667
	5	5	15	0.3333
	5	6	15	0.3667
	6	5	15	0.3667
	5	6	15	0.3667
	5.099	5	15	0.3366
	5	6	15	0.3667
	5	5	15	0.3333
	5	6	15	0.3667
	5	5	16	0.3125
	5	5	16	0.3125
	6.0828	6	15.0333	0.4019
	5	6	15	0.3667
	5	5	15	0.3333
	5	5	16	0.3125
	5	5	16.0312	0.3119
	5	6	16	0.3438
	5	5	16	0.3125
	5	6	16	0.3438
	6	5	16	0.3438
	5	6	15	0.3667
	6	5	16.0312	0.3431
	5	6	16	0.3438
	5	5	15	0.3333
	5.099	6	16	0.3468
	5	5	16.0312	0.3119
	5	6	16	0.3438
	5	5	15	0.3333
	5	6	16	0.3438
	5	5.099	16	0.3156
	5	5	16	0.3125
	5	5.099	16	0.3156
	5.099	6	16	0.3468
	5	5	16.0312	0.3119
	5	5	16	0.3125
	5	5	15	0.3333
	5.099	5	16	0.3156
	6	6	16.0312	0.3743
	5.099	6	16	0.3468
	5	5	16.0312	0.3119
	5	6	15	0.3667
	6	6	16.0312	0.3743
	5.099	6	16	0.3468
	5	5.099	16.0312	0.315
	5	6	15	0.3667
	5	5	15.0333	0.3326
	5	6	16	0.3438
	5.099	5	16	0.3156
	5	6	16	0.3438
	5	5.099	16	0.3156
	5	5	15	0.3333
	5	5	16	0.3125
	5	6	15	0.3667
	5	5	15.0333	0.3326
	5	6	16	0.3438
	6	6	16	0.375
	5	6	16	0.3438
	6	6	16.0312	0.3743
	5.099	6	15	0.37
	6	5	15	0.3667
	6	6	15	0.4
	6	5	15	0.3667
	5.099	6	16	0.3468
	5	5	15	0.3333
	5.099	5	16	0.3156
	6	6	15	0.4
	5	5	16	0.3125
	6	6.0828	16.0312	0.3769
	5.099	5	15	0.3366
	5	5.099	15.0333	0.3359
	5	6	15	0.3667
	5	5.099	15	0.3366
	5	5	15	0.3333
	5	5.099	16	0.3156
	4	4.1231	14.0357	0.2894
	4.1231	4.1231	14.0357	0.2938
	3	3	14.0357	0.2137
	3	3	14	0.2143
	3.1623	3	14	0.2201
	3.1623	4.1231	14.0357	0.2595
	4	3	14.0357	0.2494
	3	4	14.0357	0.2494
	3	4	14.0357	0.2494
	4	3.1623	14.0357	0.2551
	4	3	14.0357	0.2494
	3	4.1231	14.0357	0.2538
	3	4	14.0357	0.2494
	4	3	14.0357	0.2494
	4	4	15.0333	0.2661
	5	4	14	0.3214
	4	5	15	0.3
	4	4	14	0.2857
	4	4	15	0.2667
	4	4	14	0.2857
	4.1231	4	15	0.2708
	4	5	14	0.3214
	5.099	4	14	0.325
	4	5	15	0.3
	4	5	15	0.3
	5	5.099	15	0.3366
	4	5	15	0.3
	5	5	15	0.3333
	5	5	15	0.3333
	5	5	15	0.3333
	5	5	15	0.3333
	5	5	15	0.3333
	5	4	15	0.3
	5	5	15	0.3333
	5.099	5	16	0.3156
	5	5	15	0.3333
	5	4	15	0.3
	5	5	15	0.3333
	5	5	15	0.3333
	6	5	15	0.3667
	5	5	15	0.3333
	6	5	15	0.3667
	5	4	15	0.3
	5	5	15	0.3333
	5	5	15	0.3333
	6	5	15	0.3667
	5	5	15	0.3333
	6	5	15	0.3667
	5	5	16	0.3125
	6	5	15	0.3667
	5	4	15	0.3
	5	5	15	0.3333
	5	5	15	0.3333
	6	5	14	0.3929
	5	5	15	0.3333
	5	5	15	0.3333
	5	5	16	0.3125
	5	5	16	0.3125
	5	6	16	0.3438
	5	5	15	0.3333
	5	5	16	0.3125
	5	5	15	0.3333
	5	6	15	0.3667
	5	5	15	0.3333
	5	5	15	0.3333
	6	5	15	0.3667
	5	4	15	0.3
	5	5	15	0.3333
	5.099	6	16	0.3468
	5	5	15	0.3333
	5	6	16	0.3438
	5	5	15	0.3333
	5	6	16	0.3438
	5.099	5	15	0.3366
	5	6	15	0.3667
	5.099	5	15	0.3366
	5	6	15	0.3667
	5	5.099	15	0.3366
	5	6	15	0.3667
	5	5	15	0.3333
	5	6	15	0.3667
	5	5	15	0.3333
	5	6	15	0.3667
	5	5	15	0.3333
	5	6	15	0.3667
	5	5	14.0357	0.3562
	5	6	15	0.3667
	5	5	15	0.3333
	5	6	15	0.3667
	5	5	15	0.3333
	5	6	16	0.3438
	5	5	15	0.3333
	5	6	15	0.3667
	5	5	15	0.3333
	5	6	16	0.3438
	6	5	15	0.3667
	5.099	6	15	0.37
	5	5	14	0.3571
	5	6	15	0.3667
	5	5.099	16	0.3156
	5	6	16	0.3438
	6	5	15	0.3667
	6	5	16	0.3438
	6	5	15	0.3667
	5	6	15	0.3667
	5	5.099	15	0.3366
	5.099	6	16	0.3468
	5	5.099	15	0.3366
	5	6	15	0.3667
	5	5	15	0.3333
	5	6	16	0.3438
	6	5	15	0.3667
	5	5	15	0.3333
	6	5	15	0.3667
	5	5	16	0.3125
	6	5	15	0.3667
	5.099	6	16	0.3468
	5	5.099	16	0.3156
	5	6	16	0.3438
	5	5	16	0.3125
	5	6	16	0.3438
	5	5	14	0.3571
	5	6	16	0.3438
	5	5.099	16	0.3156
	6	5.099	15.0333	0.3691
	6	5	15	0.3667
	6	5	15.0333	0.3659
	6	5	16	0.3438
	5.099	5	16	0.3156
	5	5	16	0.3125
	5	6	16	0.3438
	6	6	15	0.4
	5	5	16	0.3125
	6	6.0828	15.0333	0.4019
	5.099	6	16	0.3468
	5	5	15	0.3333
	5	6	16	0.3438
	6	5	15	0.3667
	5.099	5	16.0312	0.315
	6	5	15	0.3667
	5	6	15	0.3667
	5	5	15	0.3333
	5	6	15	0.3667
	5	5	14.0357	0.3562
	5	5	16	0.3125
	5	5.099	15	0.3366
	5	6	16	0.3438
	5	5	16	0.3125
	5	6	16	0.3438
	5.099	5	15	0.3366
	5.099	6	16	0.3468
	5	5	15	0.3333
	5.099	6	16	0.3468
	5.099	5	15	0.3366
	5	6	16	0.3438
	5.099	5	15	0.3366
	5	6	16	0.3438
	5	5	15	0.3333
	5	6	15	0.3667
	5	5	15	0.3333
	5.099	5	15	0.3366
	6.0828	5	15	0.3694
	5	5	15	0.3333
	5	5	15	0.3333
	4	4	15	0.2667
	4	4	15	0.2667
	4	4	15.0333	0.2661
	4	4.1231	15.0333	0.2702
	4	5	15.0333	0.2993
	4	4.1231	15.0333	0.2702
	4	4	16.0312	0.2495
	4	4	14.0357	0.285
	4.1231	4	16	0.2538
	4	4	15	0.2667
	4	4	15	0.2667
	4	4.1231	15	0.2708
	5	4	15	0.3
	4	5	15	0.3
	4	4	15.0333	0.2661
	4	4	14	0.2857
	4	4	15.0333	0.2661
	4	4	14	0.2857
	4	4	14.0357	0.285
	4	4	14	0.2857
	4	4	15	0.2667
	4	4	15	0.2667
	3	4	15.0333	0.2328
	3	4	14.0357	0.2494
	3	4	15.0333	0.2328
	3	4	14.0357	0.2494
	3	4	15	0.2333
	3	4	14.0357	0.2494
	4	4	15	0.2667
	4	3	15	0.2333
	4	4	15	0.2667
	4	4	14	0.2857
	4	3	15.0333	0.2328
	4	4	15	0.2667
	4	4	15.0333	0.2661
	4	4	14	0.2857
	3	4	15.0333	0.2328
	3	4.1231	14	0.2544
	4	4	15	0.2667
	4	3	14	0.25
	4	4	15	0.2667
	4	4	15	0.2667
	4	4	15	0.2667
	4	4	15	0.2667
	4	4	15.0333	0.2661
	4	4	15	0.2667
	4.1231	4	15.0333	0.2702
	4	4	15	0.2667
	4	4	15	0.2667
	3	4	15.0333	0.2328
	4.1231	4	15.0333	0.2702
	4	3	15	0.2333
	4	4	16.0312	0.2495
	4	4	15	0.2667
	3	4	15	0.2333
	4	4	15	0.2667
	4	3	15.0333	0.2328
	4	3	15	0.2333
	4	3	15.0333	0.2328
	4	4	15	0.2667
	4	4	15	0.2667
	4	4	15	0.2667
	3	4	15	0.2333
	4	4	15	0.2667
	4	4	15	0.2667
	4	4	15	0.2667
	4	4	15.0333	0.2661
	4	4.1231	14.0357	0.2894
	4	4	15.0333	0.2661
	5	4.1231	14.0357	0.325
	4	4	15.0333	0.2661
	4	4	14.0357	0.285
	4	4	15.0333	0.2661
	4	4	14	0.2857
	4	3	15.0333	0.2328
	3	4	15.0333	0.2328
	4	3	15.0333	0.2328
	4	3	15	0.2333
	4	4	15.0333	0.2661
	4	4	14.0357	0.285
	4	4	15	0.2667
	5	4	15.0333	0.2993
	4	4	15	0.2667
	4	3	14.0357	0.2494
	4	4	15	0.2667
	4	3	15.0333	0.2328
	5	4	15	0.3
	4	4	15	0.2667
	5	4	15	0.3
	4	4	15	0.2667
	4	4	15	0.2667
	4	3	15.0333	0.2328
	4	4	15	0.2667
	4	3	15.0333	0.2328
	4	3	15.0333	0.2328
	4	3	15.0333	0.2328
	4	4	15	0.2667
	4	4	15	0.2667
	4	4	15	0.2667
	4	4	15	0.2667
	4	4	15.0333	0.2661
	4	3	15	0.2333
	4	4	15.0333	0.2661
	4	3	15	0.2333
	4	3	15.0333	0.2328
	3	3	15.0333	0.1996
	4	3	15.0333	0.2328
	4	4	15.0333	0.2661
	4	4	16.0312	0.2495
	4	4	15	0.2667
	4	4	15	0.2667
	4	4	15	0.2667
	4	4	16	0.25
	4.1231	4	15.0333	0.2702
	4	4	16.0312	0.2495
	4.1231	4	15.0333	0.2702
	4	4	15	0.2667
	4	4	15.0333	0.2661
	4	4	15.0333	0.2661
	4	4	15.0333	0.2661
	4	4	15.0333	0.2661
	4	4	15.0333	0.2661
	4	4	15	0.2667
	4	5	15	0.3
	4	4	15	0.2667
	4	4	15	0.2667
	4	3	15.0333	0.2328
	4	4	15.0333	0.2661
	4	4	15.0333	0.2661
	5	4	15.0333	0.2993
	4	4	15.0333	0.2661
	4	4	15.0333	0.2661
	4	4	15.0333	0.2661
	4	4.1231	15.0333	0.2702
	4	4	15.0333	0.2661
	4	4	15.0333	0.2661
	4	4	15.0333	0.2661
	4	4	15.0333	0.2661
	4	4	15.0333	0.2661
	4	4	15.0333	0.2661
	4	4	15.0333	0.2661
	3	4	16.0312	0.2183
	4	4	15.0333	0.2661
	4	4	14.0357	0.285
	4	4	15.0333	0.2661
	4	4.1231	15.0333	0.2702
	4	4	15.0333	0.2661
	4	4	15.0333	0.2661
	4	4	15.0333	0.2661
	4	4	14.0357	0.285
	4	5	15.0333	0.2993
	4	4.1231	15.0333	0.2702
	4	5.099	15.0333	0.3026
	4	4	15.0333	0.2661
	4	5	15.0333	0.2993
	5	4.1231	15.0333	0.3034
	4	5.099	15.0333	0.3026
	4	4	15.0333	0.2661
	4	5	15.0333	0.2993
	4	4	15.0333	0.2661
	4.1231	4	15.0333	0.2702
	4	4	15.0333	0.2661
	4	4.1231	15	0.2708
	3.1623	4	14.0357	0.2551
	4	4	15.0333	0.2661
	4	4	15.0333	0.2661
	4	4	15.0333	0.2661
	4	4.1231	14.0357	0.2894
	4	4	15.0333	0.2661
	3	4	15.0333	0.2328
	4	4	15.0333	0.2661
	3.1623	4	15.0333	0.2382
	4	4	16.0312	0.2495
	4	4	15.0333	0.2661
	4.1231	4	15	0.2708
	4.1231	4	15	0.2708
	4	4	15.0333	0.2661
	4	4.1231	15.0333	0.2702
	4	4	15.0333	0.2661
	4	4.1231	14.0357	0.2894
	4	5	15.0333	0.2993
	4.1231	4	15.0333	0.2702
	4.1231	5	16.0312	0.2845
	4	4	15.0333	0.2661
	4	5	15.0333	0.2993
	4	4.1231	14.0357	0.2894
	4	4.1231	15.0333	0.2702
	4	4	16.0312	0.2495
	4	4	16	0.25
	4	4	15	0.2667
	4	4	15	0.2667
	4	4.1231	14.0357	0.2894
	4	4	15	0.2667
	4	4	14.0357	0.285
	4	4	15.0333	0.2661
	4	4	15.0333	0.2661
	4	4	15.0333	0.2661
	4	4.1231	14.0357	0.2894
	4	4	15.0333	0.2661
	4	4	15.0333	0.2661
	4	4	15	0.2667
	4	4	15.0333	0.2661
	4	4.1231	15	0.2708
	4	4	15.0333	0.2661
	4	4	15	0.2667
	4	4	15.0333	0.2661
	4	4	15	0.2667
	5	4	15.0333	0.2993
	4	4	15.0333	0.2661
	4	4	15.0333	0.2661
	4	4	15	0.2667
	4	4	15.0333	0.2661
	4	4.1231	15.0333	0.2702
	4	4	15.0333	0.2661
	4	4	15.0333	0.2661
	4.1231	4	15.0333	0.2702
	4	4	15	0.2667
	4	4	16.0312	0.2495
	4	4	15	0.2667
	4	4	15.0333	0.2661
	4	4	15	0.2667
	4	4	15.0333	0.2661
	4	4	15	0.2667
	4	4	15.0333	0.2661
	4	4	15	0.2667
	4	4.1231	14.0357	0.2894
	4	4	15.0333	0.2661
	4	4	14.0357	0.285
	4	4.1231	15	0.2708
	4	4.1231	16.0312	0.2534
	4	4	15	0.2667
	4	4	15.0333	0.2661
	4	4	15	0.2667
	4	4	15.0333	0.2661
	4	4	15	0.2667
	4	4	15.0333	0.2661
	4	4	15.0333	0.2661
	4	4	15.0333	0.2661
	4	4	15.0333	0.2661
	4	4.1231	15.0333	0.2702
	4	4	15.0333	0.2661
	4	4	15.0333	0.2661
	4	4	15	0.2667
	4	4	15	0.2667
	4	4	15	0.2667
	4	4.1231	15	0.2708
	4	4	15	0.2667
	4	4	15	0.2667
	4	4	15	0.2667
	4	4	16.0312	0.2495
	4	4	15	0.2667
	4	4	15.0333	0.2661
	4	4.1231	15	0.2708
	4	4	15	0.2667
	3	4	15	0.2333
	4	4	15	0.2667
	4	4	15	0.2667
	4	4	15	0.2667
	3	4	15	0.2333
	4	4	15	0.2667
	4	3	15.0333	0.2328
	3	3	14	0.2143
	3	3	14.0357	0.2137
	3	3	14	0.2143
	3	4	15.0333	0.2328
	3	4	15	0.2333
	3	3	15.0333	0.1996
	3	4	15	0.2333
	3	4	15.0333	0.2328
	4	4.1231	14	0.2901
	4	3	14.0357	0.2494
	4	3	14.0357	0.2494
	4	3	15.0333	0.2328
	3	3	15	0.2
	3	3	15.0333	0.1996
	3.1623	3.1623	15	0.2108
	3	3	14.0357	0.2137
	3	3	15	0.2
	3	4	15	0.2333
	4	4	14	0.2857
	3	4	15.0333	0.2328
	4	4.1231	14	0.2901
	3	4	15.0333	0.2328
	4	4	15	0.2667
	3	4	15	0.2333
	4	4	14	0.2857
	3	4	15	0.2333
	4	4	14	0.2857
	3	4	15	0.2333
	4	4	14	0.2857
	3	4	14	0.25
	4	4	14	0.2857
	3	4	15.0333	0.2328
	4	4	14	0.2857
	4	4	15.0333	0.2661
	4	4	15	0.2667
	4	4	15	0.2667
	4	4	15	0.2667
	3	4	15	0.2333
	4	4	15	0.2667
	3	4	14	0.25
	4	4	15	0.2667
	3	4	15	0.2333
	4	4	15	0.2667
	3	4	16.0312	0.2183
	4	4	15	0.2667
	3	4	15.0333	0.2328
	4	4	15	0.2667
	3	4	15.0333	0.2328
	4	4	15	0.2667
	3	4	15	0.2333
	4	4	15	0.2667
	3	4	15	0.2333
	4	4	14	0.2857
	3	4	15	0.2333
	4	4.1231	14	0.2901
	3	4	15.0333	0.2328
	4	4	15	0.2667
	4	4	15.0333	0.2661
	4	4	14	0.2857
	3	4	15	0.2333
	4	4.1231	14	0.2901
	4	4	15	0.2667
	4	4	14	0.2857
	3	4	15	0.2333
	4	4.1231	14	0.2901
	3	4	15	0.2333
	4	4.1231	14	0.2901
	4	4	15.0333	0.2661
	4	3	15	0.2333
	4	3	15.0333	0.2328
	3	3	15.0333	0.1996
	3	4	15	0.2333
	4	4.1231	14	0.2901
	4	4	15	0.2667
	4	4	14	0.2857
	4	4	15	0.2667
	4	4	14	0.2857
	4	4	15	0.2667
	4	4	15	0.2667
	3	4	15	0.2333
	4	4	14	0.2857
	3	4	15	0.2333
	4	4	15	0.2667
	3	4	15.0333	0.2328
	4	4	15	0.2667
	3	4	15	0.2333
	4	4	14	0.2857
	4	4	15	0.2667
	4	4	15	0.2667
	3	4	15	0.2333
	4	4	14	0.2857
	3	4	15	0.2333
	4	4	15	0.2667
	3	4	15.0333	0.2328
	4	4	14	0.2857
	3	4	15	0.2333
	4	4	14	0.2857
	3	4	15	0.2333
	4	4	15	0.2667
	4	4	15	0.2667
	4	4	15	0.2667
	4	4	15.0333	0.2661
	4	4	15	0.2667
	3	4	15	0.2333
	4	4	14	0.2857
	3	4	15	0.2333
	4	4	14	0.2857
	3	4	15	0.2333
	4	4	15	0.2667
	3	4	15	0.2333
	4	4	15	0.2667
	3	4	15	0.2333
	4	4	15	0.2667
	4	4	15	0.2667
	4	4	15	0.2667
	4	4	15	0.2667
	4	4	15	0.2667
	4	4	15	0.2667
	4	4	15	0.2667
	4	4	15	0.2667
	4	4.1231	14	0.2901
	4	4	15	0.2667
	4	4	15	0.2667
	4	4	15.0333	0.2661
	4	4	15	0.2667
	4	4	15	0.2667
	4	4	15	0.2667
	4	4	15.0333	0.2661
	4	4.1231	15	0.2708
	4	4	15	0.2667
	4	3	15.0333	0.2328
	4	3	15.0333	0.2328
	4	3	15	0.2333
	4	3.1623	15.0333	0.2382
	3	3	15	0.2
	4	5	15.0333	0.2993
	4.1231	4	15.0333	0.2702
	4	4	15.0333	0.2661
	4.1231	4	15.0333	0.2702
	4	4	15.0333	0.2661
	4.1231	4	15.0333	0.2702
	4	4	15	0.2667
	4	4	16.0312	0.2495
	4.1231	5	15.0333	0.3034
	4	4	15.0333	0.2661
	4.1231	4	15.0333	0.2702
	4.1231	4	15.0333	0.2702
	4.1231	4	15.0333	0.2702
	4	4	14.0357	0.285
	4.1231	5	15.0333	0.3034
	4.1231	4	15.0333	0.2702
	4	4	15.0333	0.2661
	4	4	15.0333	0.2661
	4	4	15.0333	0.2661
	4.1231	4	15.0333	0.2702
	4	4	15.0333	0.2661
	4	4	15.0333	0.2661
	4	5	15.0333	0.2993
	4	4	15.0333	0.2661
	4	5	15	0.3
	4	4	15.0333	0.2661
	4	5	16.0312	0.2807
	4	4	15.0333	0.2661
	4.1231	4	15.0333	0.2702
	4	4	15.0333	0.2661
	4	4	16.0312	0.2495
	4	4	15.0333	0.2661
	4.1231	4	15.0333	0.2702
	4	4	15.0333	0.2661
	4	4	15.0333	0.2661
	4	4	15.0333	0.2661
	4	4	15.0333	0.2661
	4	4	15.0333	0.2661
	4	4	15.0333	0.2661
	4.1231	4	14.0357	0.2894
	4.1231	4	15.0333	0.2702
	4	4	15.0333	0.2661
	4	4	15.0333	0.2661
	4	4	15.0333	0.2661
	5	4	15.0333	0.2993
	4	4.1231	15.0333	0.2702
	4	4.1231	15.0333	0.2702
	4.1231	4	15.0333	0.2702
	4	4	15.0333	0.2661
	4.1231	4	15.0333	0.2702
	5	4	15.0333	0.2993
	4	4	15.0333	0.2661
	4	5	15.0333	0.2993
	4	4	15.0333	0.2661
	4	4	15.0333	0.2661
	4	4	15.0333	0.2661
	5.099	4	15	0.3033
	4.1231	5	15	0.3041
	5	4	15	0.3
	4	5	15	0.3
	4	4	15.0333	0.2661
	4	4	15.0333	0.2661
	3	4	15.0333	0.2328
	4	3	15	0.2333
	4	4	15.0333	0.2661
	4	3	15	0.2333
	4	4	15.0333	0.2661
	4.1231	4	15	0.2708
	4	4	15	0.2667
	4	4.1231	14.0357	0.2894
	5	4	15.0333	0.2993
	5	5	15.0333	0.3326
	5	5	15.0333	0.3326
	5	5	16.0312	0.3119
	5	5	15	0.3333
	5	5.099	16.0312	0.315
	5	5	15	0.3333
	6	5	15.0333	0.3659
	5	5	15	0.3333
	6.0828	5	15.0333	0.3686
	5	5	15.0333	0.3326
	6	5.099	16.0312	0.3462
	6	5	15.0333	0.3659
	6.0828	6	15.0333	0.4019
	6	5	15.0333	0.3659
	6	6.0828	16.0312	0.3769
	5	5	15	0.3333
	6.0828	6	15.0333	0.4019
	6	5	15	0.3667
	6.0828	6	15.0333	0.4019
	6	5	15.0333	0.3659
	6.0828	6	15.0333	0.4019
	6	5.099	15.0333	0.3691
	6.0828	6	15.0333	0.4019
	6	5.099	15	0.37
	6.0828	6	15.0333	0.4019
	6	6.0828	15	0.4028
	5.099	5	15.1327	0.3337
	6	5	15.0333	0.3659
	6	6	16.0312	0.3743
	6	5	15	0.3667
	6.0828	6	15.0333	0.4019
	6	6	15.0333	0.3991
	6.0828	6	15.0333	0.4019
	6	5	15	0.3667
	6.0828	6	15.0333	0.4019
	6	5	15.0333	0.3659
	6	6	15.0333	0.3991
	6	6	15	0.4
	5.099	5.099	15.1327	0.337
	6	6	15	0.4
	5.099	5	15.0333	0.3359
	6	6	15	0.4
	6.0828	6	15.0333	0.4019
	6	5	15	0.3667
	6.0828	6.0828	16.1245	0.3772
	6	5	15	0.3667
	6	6	16.0312	0.3743
	6	6	15	0.4
	6.0828	6	15.0333	0.4019
	5	6.0828	15	0.3694
	6	5.099	15.0333	0.3691
	6	6	15	0.4
	6.0828	5.099	15.1327	0.3695
	6	6	15	0.4
	6	6.0828	15.0333	0.4019
	6	5.099	15.0333	0.3691
	6.0828	6	15.0333	0.4019
	6	6.0828	15	0.4028
	6.0828	6	15.0333	0.4019
	5	6.0828	15	0.3694
	5.099	5	15.0333	0.3359
	5	6.0828	15	0.3694
	5	5	15.0333	0.3326
	5	6.0828	15	0.3694
	5.099	5	15.0333	0.3359
	6	5.099	15	0.37
	6	6	15.0333	0.3991
	6	5.099	15	0.37
	6	6	15.0333	0.3991
	5.099	6	16	0.3468
	5	5	15.0333	0.3326
	5	6	15	0.3667
	5	5	15.0333	0.3326
	5.099	6	16	0.3468
	6	5	15.0333	0.3659
	5.099	6	16	0.3468
	6	5	15.0333	0.3659
	5	6	15	0.3667
	6	5	15.0333	0.3659
	6.0828	5	15	0.3694
	6	6	15.0333	0.3991
	5.099	6	15	0.37
	5	5	15.0333	0.3326
	5	6.0828	15	0.3694
	5	5	15.0333	0.3326
	5.099	6	16	0.3468
	5	5	15.1327	0.3304
	5	6	15	0.3667
	5.099	5	15.1327	0.3337
	5	6	16	0.3438
	5	5	15.1327	0.3304
	5.099	6	16	0.3468
	5	5	15.0333	0.3326
	5.099	6	16	0.3468
	5	5	15.0333	0.3326
	5.099	6	16	0.3468
	5	5	15.0333	0.3326
	5	6	16	0.3438
	5	5	15.0333	0.3326
	5.099	6	16	0.3468
	5	5	15.0333	0.3326
	5.099	6	16	0.3468
	5	5	15.0333	0.3326
	5.099	6	16	0.3468
	5.099	5	15.0333	0.3359
	5	6.0828	15	0.3694
	5	5	15.1327	0.3304
	5.099	6	16	0.3468
	5	5	16.1245	0.3101
	5	6	16	0.3438
	5	5	15.0333	0.3326
	5	6	16	0.3438
	6	6	15.1327	0.3965
	5.099	6	15	0.37
	6	5	15.1327	0.3635
	5	6	16	0.3438
	6	5	15.1327	0.3635
	5	6	16	0.3438
	5	5	15.0333	0.3326
	5	6	16	0.3438
	5	5	15.0333	0.3326
	6	5	16	0.3438
	6	5	16.0312	0.3431
	5	6	16	0.3438
	5	5	15.0333	0.3326
	5	6	16	0.3438
	5	5	15.0333	0.3326
	5.099	6	16	0.3468
	6	6	15.1327	0.3965
	5	6	16	0.3438
	6	5	15.0333	0.3659
	5	6.0828	15	0.3694
	5.099	5	15.0333	0.3359
	5	5.099	15	0.3366
	6	5	15.0333	0.3659
	5.099	6	16	0.3468
	5.099	5	15.0333	0.3359
	5.099	6	16	0.3468
	6.0828	5	15.0333	0.3686
	5	6	16	0.3438
	5	5	15.0333	0.3326
	5	5	15	0.3333
	5	5	15.0333	0.3326
	5	5.099	15	0.3366
	6	5	15.0333	0.3659
	6.0828	5	16	0.3463
	6	5	16.0312	0.3431
	5	6	16	0.3438
	6	5	15.0333	0.3659
	5	6	16	0.3438
	5	5	15.0333	0.3326
	5.099	5	16	0.3156
	6	5	15.0333	0.3659
	6.0828	5	16	0.3463
	6	6.0828	16.0312	0.3769
	5.099	5	16	0.3156
	6	5	16.0312	0.3431
	5	5	16	0.3125
	6	5	15.0333	0.3659
	5.099	6	16	0.3468
	6	5	15.0333	0.3659
	5.099	6	16	0.3468
	6	5	15.0333	0.3659
	5.099	6	16	0.3468
	6.0828	5	15.0333	0.3686
	5	6.0828	15	0.3694
	6	5	15.0333	0.3659
	5	6.0828	16	0.3463
	6	5	15.0333	0.3659
	5	5.099	15	0.3366
	6	6	15.0333	0.3991
	5.099	5	15	0.3366
	6	5	15.0333	0.3659
	5	5.099	16	0.3156
	6	5	15.0333	0.3659
	5	5.099	15	0.3366
	6	5	15.0333	0.3659
	5	5	15	0.3333
	6.0828	5	15.0333	0.3686
	5.099	5	16	0.3156
	6.0828	5	15.0333	0.3686
	5.099	5	15	0.3366
	6	5	15.0333	0.3659
	5.099	5	16	0.3156
	5	5	15.0333	0.3326
	6	6	16	0.375
	6	6	15.0333	0.3991
	6.0828	6	16	0.3776
	6	6	15.0333	0.3991
	5.099	5	16	0.3156
	6	5	15.0333	0.3659
	5.099	5	16	0.3156
	6	5	15.0333	0.3659
	5.099	5	16	0.3156
	6	5	15.0333	0.3659
	6.0828	5	16	0.3463
	6	6	15.0333	0.3991
	6.0828	6	16.0312	0.3769
	6	6	16.0312	0.3743
	6	6	16	0.375
	6	6.0828	16.0312	0.3769
	6	5	16.0312	0.3431
	6	5	16.0312	0.3431
	5	5	16	0.3125
	6	5	16.0312	0.3431
	6.0828	5	16	0.3463
	6	5	15.0333	0.3659
	6.0828	6	16.0312	0.3769
	6	6	15.0333	0.3991
	6.0828	5	16	0.3463
	6	6	15.0333	0.3991
	6.0828	5	16	0.3463
	6	6	15.0333	0.3991
	6	5.099	16.0312	0.3462
	6	6	15.0333	0.3991
	6	5	15.0333	0.3659
	6	6	15.0333	0.3991
	5	5.099	15	0.3366
	6	6	15.0333	0.3991
	5	5	15	0.3333
	6	5	15.0333	0.3659
	6.0828	6	16	0.3776
	6	6	15.0333	0.3991
	5.099	5	16	0.3156
	6	5	15.0333	0.3659
	5.099	5	16	0.3156
	6	5	15.0333	0.3659
	5.099	5	16	0.3156
	6	5	15.0333	0.3659
	6.0828	5	16.0312	0.3457
	6	5	15.0333	0.3659
	5.099	5	16	0.3156
	6	5	15.0333	0.3659
	5.099	5	16	0.3156
	6	5	15.0333	0.3659
	6.0828	5	16	0.3463
	6	6	16.0312	0.3743
	5.099	5	16	0.3156
	5.099	5	15.0333	0.3359
	4	3	15.0333	0.2328
	4	3	14	0.25
	4	3	15.0333	0.2328
	4	3	14	0.25
	3	4	16	0.2188
	4	4	15	0.2667
	4	4	15	0.2667
	5	4	15	0.3
	5	5	15	0.3333
	5	4	15	0.3
	5	5	15	0.3333
	5	5	15.0333	0.3326
	5	5	15	0.3333
	5	5	15.0333	0.3326
	5	5	15	0.3333
	5	5	15.0333	0.3326
	5	5	16.0312	0.3119
	5	5.099	16.0312	0.315
	6	5	15	0.3667
	6	5.099	16.0312	0.3462
	5	5	15.0333	0.3326
	5	5.099	16.0312	0.315
	5	5	15	0.3333
	5	5.099	16.0312	0.315
	5	5	15	0.3333
	5	5.099	16.0312	0.315
	5	5	16.0312	0.3119
	5.099	5	15.0333	0.3359
	6	5	15	0.3667
	5	5.099	16.0312	0.315
	5	5	15	0.3333
	6	5	16.0312	0.3431
	5	5	15	0.3333
	6	5.099	16.0312	0.3462
	5	5	15.0333	0.3326
	5.099	5	15.0333	0.3359
	5	5.099	15	0.3366
	5	5	16.0312	0.3119
	5	5	15.0333	0.3326
	5.099	5.099	16.0312	0.3181
	5	5.099	15	0.3366
	6.0828	5	15.0333	0.3686
	5	5.099	15	0.3366
	6	5	16.0312	0.3431
	5	6	15	0.3667
	6	6	16.0312	0.3743
	5	6	15	0.3667
	6.0828	5	16.0312	0.3457
	5	5.099	15	0.3366
	5	5.099	16.0312	0.315
	5	5	15	0.3333
	5.099	5.099	16.0312	0.3181
	6	5	15	0.3667
	6	5.099	16.0312	0.3462
	5	6	15	0.3667
	6	5.099	16.0312	0.3462
	5	6	15	0.3667
	6	6.0828	16.0312	0.3769
	5	5	16	0.3125
	6	5.099	16.0312	0.3462
	6	5	15.0333	0.3659
	6	5	16.0312	0.3431
	6	5	15	0.3667
	6	5.099	16.0312	0.3462
	6	5.099	15	0.37
	6	6.0828	16.0312	0.3769
	5	6	15	0.3667
	6	5.099	16.0312	0.3462
	5	6	15	0.3667
	6	6	16.0312	0.3743
	5	6	15	0.3667
	6	6.0828	16.0312	0.3769
	5	6	15	0.3667
	6	6.0828	16.0312	0.3769
	5	6	15	0.3667
	6	6	16.0312	0.3743
	5	6	15	0.3667
	6.0828	6	16.0312	0.3769
	5	6	15	0.3667
	6.0828	6	15.0333	0.4019
	5	6.0828	15	0.3694
	6.0828	6	16.0312	0.3769
	5	6	15	0.3667
	6.0828	6	15.0333	0.4019
	5	5	16	0.3125
	6	6	15.0333	0.3991
	5.099	5	16	0.3156
	5	5	15.0333	0.3326
	6	5	16	0.3438
	5.099	5	15	0.3366
	5.099	6	16	0.3468
	6.0828	6	15.0333	0.4019
	5	5.099	15	0.3366
	6	6	15.0333	0.3991
	5.099	5	16	0.3156
	5.099	5	15	0.3366
	6.0828	5	16.0312	0.3457
	5	5	15.0333	0.3326
	5.099	5	15.0333	0.3359
	5	5	15.0333	0.3326
	5.099	5	16.0312	0.315
	6	5	15	0.3667
	5	6	16	0.3438
	6	6	15.0333	0.3991
	5	5	16	0.3125
	6	6	15.0333	0.3991
	5	5	16	0.3125
	5	5	15	0.3333
	5	5	16.0312	0.3119
	5	5	15	0.3333
	6	5	16.0312	0.3431
	5.099	5	15.0333	0.3359
	6	6	15	0.4
	5	5	15.0333	0.3326
	5	5	16.0312	0.3119
	5	5	15	0.3333
	5	5	16	0.3125
	5.099	5	15	0.3366
	5	5	16.0312	0.3119
	5	5	15	0.3333
	5	5	16.0312	0.3119
	5.099	5	15.0333	0.3359
	5.099	5	16	0.3156
	5	5	15.0333	0.3326
	6.0828	6	16.0312	0.3769
	5	5	15.0333	0.3326
	6	5	16	0.3438
	5.099	5	16.0312	0.315
	6	5	16	0.3438
	5.099	5	15	0.3366
	5.099	5	15	0.3366
	5.099	5	15	0.3366
	5.099	5	16	0.3156
	5.099	5	15.0333	0.3359
	6.0828	5	16	0.3463
	5.099	5	15.0333	0.3359
	5.099	5	16	0.3156
	5.099	5	15	0.3366
	5.099	5	15	0.3366
	6.0828	5	15	0.3694
	5	5	15	0.3333
	5	5.099	15	0.3366
	5	5	15	0.3333
	5.099	5	15.0333	0.3359
	5.099	5	15	0.3366
	5	5	16.0312	0.3119
	5	5	15	0.3333
	5	5	15	0.3333
	5.099	5	15	0.3366
	5	5	15	0.3333
	5.099	5	15	0.3366
	5	5	15	0.3333
	5.099	5	16	0.3156
	5.099	5	15.0333	0.3359
	5.099	5	16	0.3156
	6	5.099	16	0.3468
	6	6	16.0312	0.3743
	5.099	5	15.0333	0.3359
	5	5	15	0.3333
	5.099	5	15.0333	0.3359
	5	5	16	0.3125
	6.0828	5	15	0.3694
	5	5	16	0.3125
	6	5	15	0.3667
	5	5	16	0.3125
	6	5	15	0.3667
	6	5	16	0.3438
	6	5	15.0333	0.3659
	6.0828	6	16	0.3776
	6	5	15.0333	0.3659
	6	6	16	0.375
	6	5	15.0333	0.3659
	6.0828	5	16	0.3463
	6	5	15	0.3667
	5	5	15	0.3333
	6.0828	5	15	0.3694
	5	5	15	0.3333
	5	5	15	0.3333
	6	6	16.0312	0.3743
	5	5	15	0.3333
	6.0828	6	15	0.4028
	5	5	15.0333	0.3326
	6.0828	6	16	0.3776
	6.0828	5	15.0333	0.3686
	5.099	5	15	0.3366
	5.099	5	15.0333	0.3359
	5	5	16	0.3125
	5.099	5	15	0.3366
	6	5	16	0.3438
	5.099	5	15.0333	0.3359
	6.0828	6	16.0312	0.3769
	6.0828	5	15	0.3694
	6.0828	5	15	0.3694
	6.0828	5	15	0.3694
	6.0828	6	16.0312	0.3769
	5.099	5	15.0333	0.3359
	6.0828	6	16	0.3776
	5.099	5	15	0.3366
	6	6	16	0.375
	5	5	15.0333	0.3326
	6	6	16.0312	0.3743
	6.0828	5	15.0333	0.3686
	6	5	16	0.3438
	5.099	5	15	0.3366
	6	6	16.0312	0.3743
[truncated: 16,429 more rows]

## Sheet: eyeblink8-4
	A	B	C	EAR
	3	2	16.0312	0.1559
	3.1623	3	15.0333	0.205
	3	3	15.0333	0.1996
	3	3	15	0.2
	3	3	16.0312	0.1871
	3	3	16	0.1875
	4	4	16	0.25
	4.1231	4	15.0333	0.2702
	4	4	15	0.2667
	4	4	15.0333	0.2661
	4	4	15	0.2667
	4.1231	4	15.0333	0.2702
	4	4	15	0.2667
	4	4.1231	16.0312	0.2534
	4	5	16.0312	0.2807
	4	4	16.0312	0.2495
	4	4	15	0.2667
	4	4	15	0.2667
	4	4	15	0.2667
	4	4.1231	16	0.2538
	5	4	15	0.3
	4	4	15.0333	0.2661
	4	4	15	0.2667
	4	4	15.0333	0.2661
	4	4	16	0.25
	4.1231	4	15.0333	0.2702
	4	4	15	0.2667
	5	4	16.0312	0.2807
	5	4.1231	15	0.3041
	4	4.1231	16.0312	0.2534
	4	4	16	0.25
	4.1231	4	15.0333	0.2702
	4	4	16	0.25
	4	4	15.0333	0.2661
	4	4	15	0.2667
	5	4.1231	16.0312	0.2845
	4	4	15	0.2667
	4	4	16	0.25
	4	4	16	0.25
	5	4	15.0333	0.2993
	4	4	16	0.25
	4	4	16	0.25
	4	4	15	0.2667
	4	5	16.0312	0.2807
	4	4	15	0.2667
	5	4.1231	16.0312	0.2845
	4	5	15.0333	0.2993
	4	4	16	0.25
	4	4.1231	15	0.2708
	4	4	16	0.25
	4	5	16.0312	0.2807
	4	4	16	0.25
	4	4	16	0.25
	5.099	4	16.0312	0.2838
	4	5	15	0.3
	4	5	16	0.2812
	4	5	16	0.2812
	4	5	16	0.2812
	4.1231	5	16	0.2851
	5	5	16	0.3125
	4	5.099	15.0333	0.3026
	5	4.1231	16.0312	0.2845
	4	4	16	0.25
	4	4	16	0.25
	4	4.1231	15.0333	0.2702
	4	4	16.0312	0.2495
	4	5	16.0312	0.2807
	4	4	16.0312	0.2495
	5	4	16	0.2812
	4	4	16.0312	0.2495
	4	4	15.0333	0.2661
	4	4	15	0.2667
	4	4	15	0.2667
	5	5	16.0312	0.3119
	4	4.1231	15	0.2708
	4	4	16	0.25
	4	4	15.0333	0.2661
	4	4	15.0333	0.2661
	4	4	15.0333	0.2661
	4	4	15	0.2667
	4	4	15.0333	0.2661
	4.1231	4	15	0.2708
	4	4	15.0333	0.2661
	5.099	4	15.0333	0.3026
	5	4	16	0.2812
	4	4.1231	16.0312	0.2534
	4	5	15.0333	0.2993
	4	4	15	0.2667
	4	5	15.0333	0.2993
	4.1231	4	15	0.2708
	5	4	15	0.3
	5	4	15.0333	0.2993
	4	4	15.0333	0.2661
	4	4.1231	16	0.2538
	4	4	15	0.2667
	4	4	16.0312	0.2495
	4	5	16.0312	0.2807
	4.1231	4	15.0333	0.2702
	4	4	15.0333	0.2661
	4	4	16.0312	0.2495
	4	4	16.0312	0.2495
	5	5.099	16.0312	0.315
	4	5	16.0312	0.2807
	4	4	16	0.25
	4	4	16.0312	0.2495
	5.099	5	15.0333	0.3359
	5	4	16	0.2812
	5	4	16.0312	0.2807
	4	5	15.0333	0.2993
	4.1231	4	15.0333	0.2702
	4	4	15.0333	0.2661
	4.1231	4	15	0.2708
	4	4	15.0333	0.2661
	4	4	15.0333	0.2661
	4	4	16.0312	0.2495
	4	4	16	0.25
	4	4	16	0.25
	4	4.1231	16.0312	0.2534
	4	4	15.0333	0.2661
	4	4	16.0312	0.2495
	5	4	16	0.2812
	5	4.1231	16.0312	0.2845
	4	4	16	0.25
	4	4	16.0312	0.2495
	4.1231	4	15	0.2708
	4	4	16.0312	0.2495
	4	4	16	0.25
	4	4.1231	16.0312	0.2534
	5.099	4	16	0.2843
	4.1231	4	15.0333	0.2702
	4.1231	4	16	0.2538
	4	4.1231	16.0312	0.2534
	4	4	16	0.25
	4	4.1231	16.0312	0.2534
	5	4	15	0.3
	4	4.1231	16.0312	0.2534
	4.1231	4	15	0.2708
	4	4	16.0312	0.2495
	4	4	15.0333	0.2661
	4	4.1231	16	0.2538
	4	4	15.0333	0.2661
	4	4	16.0312	0.2495
	4	5	15.0333	0.2993
	4	4.1231	16	0.2538
	4	5	15.0333	0.2993
	4	4	16	0.25
	4	4	15.0333	0.2661
	4	4	16	0.25
	4	4	15.0333	0.2661
	5	4.1231	16.0312	0.2845
	4	4	16.0312	0.2495
	4	4	16.0312	0.2495
	4.1231	4	16.0312	0.2534
	4	4	16.0312	0.2495
	4.1231	4	15.0333	0.2702
	4	4	16	0.25
	3	3	14.0357	0.2137
	3	3	15	0.2
	3	2	15.1327	0.1652
	3	2	15	0.1667
	2	2	15.0333	0.133
	2	3	14	0.1786
	3	3	16	0.1875
	3	3	15	0.2
	3	3.1623	15.0333	0.205
	3	4	16	0.2188
	3	3	15.0333	0.1996
	3	3	15	0.2
	4	3	16	0.2188
	4	4.1231	16	0.2538
	4.1231	4	16	0.2538
	4	4	16	0.25
	4	3	15.0333	0.2328
	4	4	16	0.25
	4	4	15.0333	0.2661
	4	4	16	0.25
	4	4.1231	15.0333	0.2702
	4	4	15	0.2667
	4	4	15	0.2667
	4	4	16	0.25
	4	4	15	0.2667
	4	3	15	0.2333
	5	4	15	0.3
	4	4	15	0.2667
	4	4	15	0.2667
	4	4	16	0.25
	4	4	15	0.2667
	4	4	16	0.25
	4	4	15	0.2667
	4	3	15	0.2333
	5	4	15	0.3
	4	4	16	0.25
	4	4	15	0.2667
	4	4.1231	16.0312	0.2534
	4	4	15	0.2667
	4	4	16.0312	0.2495
	5	4	16	0.2812
	5	5	16.0312	0.3119
	4	4	15.0333	0.2661
	4	4	16.0312	0.2495
	4	4	15.0333	0.2661
	4	4	15	0.2667
	4	4	15	0.2667
	5	4	15.0333	0.2993
	4	4	15	0.2667
	4	4	15.0333	0.2661
	4	5	15.0333	0.2993
	4	4	15	0.2667
	4	4	15	0.2667
	4.1231	4	15.0333	0.2702
	4	5	15.0333	0.2993
	5	4	15.0333	0.2993
	4	5	15.0333	0.2993
	5	4	16.0312	0.2807
	4	4	15	0.2667
	4.1231	4	15.0333	0.2702
	4	4	15	0.2667
	4	4	15.0333	0.2661
	4	5	15.0333	0.2993
	5	5	16.0312	0.3119
	5	4	15	0.3
	4	4	16.0312	0.2495
	4.1231	5	16.0312	0.2845
	4	5	16.0312	0.2807
	4	5	16.0312	0.2807
	4	4	16	0.25
	4	5	15.0333	0.2993
	4.1231	4	15	0.2708
	5	4	16	0.2812
	5	5	15.0333	0.3326
	4	4	15	0.2667
	4	4	16.0312	0.2495
	4	4	15	0.2667
	4	4	16.0312	0.2495
	4	4.1231	15	0.2708
	4.1231	4	15	0.2708
	4	5	15.0333	0.2993
	4	4	16	0.25
	4	5	15.0333	0.2993
	4	4	16.0312	0.2495
	4	5	15.0333	0.2993
	4	4	16	0.25
	4	4	15	0.2667
	4.1231	4	15	0.2708
	4	5	16.0312	0.2807
	4	4	16.0312	0.2495
	4	4	15.0333	0.2661
	4	4	16	0.25
	4	5	15.0333	0.2993
	4	4	15	0.2667
	4	4	15	0.2667
	5	5	16.0312	0.3119
	4	4	15.0333	0.2661
	4	4	16	0.25
	4	4	15.0333	0.2661
	4	4.1231	16.0312	0.2534
	4	4	15	0.2667
	4	4	15.0333	0.2661
	4	4	15.0333	0.2661
	5	4	15.0333	0.2993
	4	4	16.0312	0.2495
	4	4	16	0.25
	4	5	15.0333	0.2993
	4	4	16.0312	0.2495
	4	5	16.0312	0.2807
	4	4	15	0.2667
	4	4.1231	15.0333	0.2702
	4	4	16	0.25
	4	5	15.0333	0.2993
	4	4	15	0.2667
	5	4	15	0.3
	4	4.1231	16.0312	0.2534
	4	5	15.0333	0.2993
	4	4	16	0.25
	4	4	16.0312	0.2495
	4	4	16	0.25
	4.1231	3	16	0.2226
	4	3	16.0312	0.2183
	4	4	16	0.25
	4.1231	4	16.0312	0.2534
	4	4	16	0.25
	4	4	16.0312	0.2495
	4	4	16	0.25
	4	4	16.0312	0.2495
	4	4	16	0.25
	5	4	16.0312	0.2807
	5	4	16	0.2812
	4	4.1231	16	0.2538
	5	4	16.0312	0.2807
	4	4	16.0312	0.2495
	4.1231	4	16.0312	0.2534
	5.099	5	17.0294	0.2965
	4	4	16	0.25
	4.1231	4	16	0.2538
	4	5	16.0312	0.2807
	4	4	16.0312	0.2495
	5	4	16	0.2812
	4	4.1231	16.0312	0.2534
	5	4	16	0.2812
	4	4	16.0312	0.2495
	5	4	16	0.2812
	4	4	17.0294	0.2349
	4	4	16	0.25
	4	5	17	0.2647
	5.099	4	16.0312	0.2838
	4	4	16.0312	0.2495
	4	5	17.0294	0.2642
	5	4	17.0294	0.2642
	5	4	17	0.2647
	5	4	17.0294	0.2642
	5.099	4	16.0312	0.2838
	4.1231	4	17.0294	0.2385
	4	5	16.0312	0.2807
	4.1231	4	17.0294	0.2385
	4	4	16	0.25
	4	4	17.0294	0.2349
	4	5	16.0312	0.2807
	5	4	16.0312	0.2807
	5.099	4	16	0.2843
	4	4	17.0294	0.2349
	4	5	16.0312	0.2807
	5.099	5	17.0294	0.2965
	5	4	16	0.2812
	4	4	16.0312	0.2495
	4	5	16.0312	0.2807
	4	5	17.0294	0.2642
	5	4.1231	16.0312	0.2845
	5.099	4	16	0.2843
	4	4	16	0.25
	5	5	16.0312	0.3119
	4	5	16.0312	0.2807
	4	4	17	0.2353
	4	4	16	0.25
	4	5.099	16.0312	0.2838
	4	5	16.0312	0.2807
	4.1231	4	16	0.2538
	4	4	15	0.2667
	4	4	16.0312	0.2495
	4.1231	4	16	0.2538
	4	5.099	16.0312	0.2838
	4	4	15	0.2667
	4	5	16	0.2812
	4	5	16	0.2812
	4	4	16.0312	0.2495
	4	4.1231	16	0.2538
	4	4	16	0.25
	4	4	16	0.25
	4.1231	4	15	0.2708
	4	4.1231	16	0.2538
	4	4	16	0.25
	4	4	16	0.25
	4	4	16	0.25
	4.1231	5	16.0312	0.2845
	5	4	16.0312	0.2807
	5	4.1231	16	0.2851
	4	5	16	0.2812
	3	4	15	0.2333
	4	4	16	0.25
	2	2.2361	15.0333	0.1409
	3	2.2361	16.0312	0.1633
	2	2	16.0312	0.1248
	3	3	15.0333	0.1996
	2	2	15.0333	0.133
	3	2	15.0333	0.1663
	3	3	16.0312	0.1871
	4	3	15	0.2333
	3	3	15.0333	0.1996
	3	3	16	0.1875
	4	3.1623	15.0333	0.2382
	4	4	16	0.25
	4	4	15.0333	0.2661
	4	4	16.0312	0.2495
	4	4	15	0.2667
	4	4	16.0312	0.2495
	5	4	16	0.2812
	5	4	16.0312	0.2807
	4	4	16	0.25
	4	4	16.0312	0.2495
	4.1231	4	16	0.2538
	4.1231	4	15	0.2708
	4	5	16.0312	0.2807
	4	4	16.0312	0.2495
	4	4	16	0.25
	4	4	16.0312	0.2495
	4	4	16	0.25
	5	4	16.0312	0.2807
	4	4	16.0312	0.2495
	4	4	16.0312	0.2495
	4	4	15	0.2667
	4	4	16.0312	0.2495
	4	5.099	15	0.3033
	5	4	16.0312	0.2807
	4	4	15	0.2667
	4	4	16	0.25
	4	4	15	0.2667
	4	4	16.0312	0.2495
	4	5	15	0.3
	5	5	15	0.3333
	4	5.099	15	0.3033
	4	4	15	0.2667
	4	5	16.0312	0.2807
	4	4	16	0.25
	4	4.1231	15	0.2708
	5.099	4	15.0333	0.3026
	4	5	16	0.2812
	4	4	16	0.25
	4	5	15	0.3
	4	4	15	0.2667
	4	4	16	0.25
	4	4.1231	16	0.2538
	5	4.1231	15	0.3041
	4	4	16	0.25
	5	4	15	0.3
	4.1231	4	15	0.2708
	4	4	15.0333	0.2661
	4	4	15.0333	0.2661
	4	4	15	0.2667
	4	4	15	0.2667
	5	4.1231	15	0.3041
	4	4	16	0.25
	5	4	15	0.3
	4	4	16	0.25
	5	4	16	0.2812
	4	4	16	0.25
	4	4	15	0.2667
	4	4	16	0.25
	4	4	15.0333	0.2661
	4	4	16.0312	0.2495
	4	4	15	0.2667
	4.1231	4	16	0.2538
	4	4	15.0333	0.2661
	5	4	16.0312	0.2807
	3	4	15	0.2333
	4	4	15	0.2667
	3	4	14	0.25
	4	4	15	0.2667
	4	4	15	0.2667
	4	4	15	0.2667
	3	3	15	0.2
	3	3	15.0333	0.1996
	4	4	14	0.2857
	4	4	15.0333	0.2661
	4	4.1231	15	0.2708
	4	4	15	0.2667
	4	5	14	0.3214
	4	4	15.0333	0.2661
	4	3	14.0357	0.2494
	4	4	15.0333	0.2661
	4	5	14	0.3214
	4	4.1231	14.0357	0.2894
	4	4	13.0384	0.3068
	4	4	15.0333	0.2661
	4	4	14	0.2857
	4	4	15	0.2667
	4	4	14.0357	0.285
	3	4.1231	15.0333	0.2369
	3	4	14	0.25
	4.1231	3.1623	15	0.2428
	4	4	14.0357	0.285
	4	4.1231	15.0333	0.2702
	4	4	14	0.2857
	4.1231	3	15	0.2374
	3	4	14	0.25
	4	3.1623	15	0.2387
	3	4	14	0.25
	4	4	14.0357	0.285
	4	4	14.0357	0.285
	4	4.1231	15.0333	0.2702
	4	4	14	0.2857
	3	4	14.0357	0.2494
	3	4	14	0.25
	4	3.1623	15	0.2387
	4	3	14.0357	0.2494
	4.1231	4.1231	15.0333	0.2743
	4.1231	4.1231	14	0.2945
	4.1231	4	15.0333	0.2702
	4	4	14.0357	0.285
	4.1231	4	15.0333	0.2702
	4	4	14	0.2857
	4.1231	4	15.0333	0.2702
	4	4	14.0357	0.285
	4	4.1231	15.0333	0.2702
	4	4	14	0.2857
	4	4.1231	15	0.2708
	4	3.1623	14	0.2558
	4.1231	4.1231	15	0.2749
	3	4	14	0.25
	4	4	15	0.2667
	4	4	14	0.2857
	4	4	15.0333	0.2661
	3	4	14	0.25
	4	3	15	0.2333
	4	4	14	0.2857
	4	4	15	0.2667
	3	4	14	0.25
	4.1231	4	15.0333	0.2702
	3	4	14	0.25
	4	4.1231	15.0333	0.2702
	4	4	14	0.2857
	4.1231	4	15.0333	0.2702
	4	4.1231	14	0.2901
	4.1231	4.1231	15.0333	0.2743
	4	4	14	0.2857
	4	4	15.0333	0.2661
	4	4	14	0.2857
	4	4	15.0333	0.2661
	3	3	14	0.2143
	3	4.1231	15.0333	0.2369
	4	5	14.0357	0.3206
	4	5	15.0333	0.2993
	4	3	14.0357	0.2494
	4.1231	4	15.0333	0.2702
	3	4	14.0357	0.2494
	3	4	15.0333	0.2328
	3	3	14	0.2143
	2.2361	2.2361	14.1421	0.1581
	3	3	12	0.25
	3.1623	3	14.0357	0.2195
	3	2	12.0416	0.2076
	3.1623	3	14.1421	0.2179
	3	3	12.0416	0.2491
	3.1623	3	14.1421	0.2179
	2	3	12.0416	0.2076
	2	3	14.1421	0.1768
	3	3	13.0384	0.2301
	3	3.1623	14.1421	0.2179
	3	3	13.0384	0.2301
	2.2361	3	14.0357	0.1865
	3	3	13.0384	0.2301
	3.1623	4.1231	14.0357	0.2595
	2	3	13.0384	0.1917
	3.1623	3	14.0357	0.2195
	2	3.1623	12.1655	0.2122
	2.2361	2	14.1421	0.1498
	2	3	13.0384	0.1917
	2	2	14.1421	0.1414
	3	3	14.1421	0.2121
	3	3	14.1421	0.2121
	3	2	14.0357	0.1781
	3	3	15.0333	0.1996
	3	2	14.0357	0.1781
	3.1623	3	15.0333	0.205
	3	2	14.0357	0.1781
	3.1623	3.1623	15.1327	0.209
	3	3	14.0357	0.2137
	4.1231	3.1623	14.0357	0.2595
	3	2	13.0384	0.1917
	3	3	14.0357	0.2137
	3	3	14.0357	0.2137
	3	3	14.1421	0.2121
	3	4	14	0.25
	3	4	15.0333	0.2328
	3.1623	3	13.0384	0.2363
	3	3	14.1421	0.2121
	3	4	13.0384	0.2684
	3	3	14.1421	0.2121
	3	4	13.0384	0.2684
	4	3.1623	14.0357	0.2551
	3	3	13.0384	0.2301
	4.1231	3.1623	14.0357	0.2595
	3.1623	4	13	0.2755
	3.1623	4.1231	14.0357	0.2595
	4	3	13.0384	0.2684
	4	4.1231	14.0357	0.2894
	4	3	14.0357	0.2494
	4.1231	4.1231	14.0357	0.2938
	4	3	13.0384	0.2684
	4	4	15.0333	0.2661
	3	4.1231	14.0357	0.2538
	4.1231	3.1623	15.0333	0.2423
	3	3	14.0357	0.2137
	4	4	15.0333	0.2661
	4	3	14.0357	0.2494
	4	4.1231	15.0333	0.2702
	4.1231	3	13.0384	0.2732
	4	4	15.0333	0.2661
	4	3	13.0384	0.2684
	4	4	15.0333	0.2661
	4	3	14.0357	0.2494
	4	4	15.0333	0.2661
	3	4	13.0384	0.2684
	4	4	15.0333	0.2661
	4	3	14.0357	0.2494
	4	4	15.0333	0.2661
	3	3	13.0384	0.2301
	4.1231	3.1623	14.0357	0.2595
	4	3	14.0357	0.2494
	4.1231	4	15.0333	0.2702
	3	3	14.0357	0.2137
	4.1231	4.1231	15.0333	0.2743
	4	3	14.0357	0.2494
	4.1231	4.1231	15.0333	0.2743
	3	3	14.0357	0.2137
	4.1231	3	15.0333	0.2369
	3	4	14.0357	0.2494
	4.1231	3	15.0333	0.2369
	3	4	14.0357	0.2494
	4	3	15.0333	0.2328
	3	4.1231	14.0357	0.2538
	4.1231	3	15.0333	0.2369
	3	4	14	0.25
	4	3	15.0333	0.2328
	3	4	14.0357	0.2494
	4.1231	3.1623	15.0333	0.2423
	3	4	14.0357	0.2494
	4.1231	3.1623	15.0333	0.2423
	3	4	14.0357	0.2494
	4.1231	3.1623	15.1327	0.2407
	3	4	14.0357	0.2494
	4	3	15.1327	0.2313
	3	4.1231	14	0.2544
	4	3	15.1327	0.2313
	3	4	14.0357	0.2494
	4	3	15.0333	0.2328
	3	3	14.0357	0.2137
	4	4	15.0333	0.2661
	3	3	14.0357	0.2137
	4	4	15.0333	0.2661
	3	4	14.0357	0.2494
	4	3	15.0333	0.2328
	4	4	14	0.2857
	4	4	15	0.2667
	3	3	14	0.2143
	4	3	15.1327	0.2313
	3	4	14.0357	0.2494
	4.1231	3	15.0333	0.2369
	3	3	14.0357	0.2137
	3	4	15.0333	0.2328
	3	3	14.0357	0.2137
	3.1623	4	15.0333	0.2382
	3	3	14.0357	0.2137
	3	4	15.0333	0.2328
	3	4	14.0357	0.2494
	4	4.1231	15.0333	0.2702
	4	4	14	0.2857
	4	3	15.0333	0.2328
	3	4	14.0357	0.2494
	4	4	15.0333	0.2661
	3	4	14.0357	0.2494
	3	4	15.0333	0.2328
	3	4	13.0384	0.2684
	4	4.1231	15.0333	0.2702
	3	4	15.0333	0.2328
	3	4	15.0333	0.2328
	3	4	13.0384	0.2684
	4	4	15.0333	0.2661
	3.1623	4	13.0384	0.2747
	4	4.1231	14.0357	0.2894
	3.1623	4	14.0357	0.2551
	4	4	15.0333	0.2661
	3	4	13.0384	0.2684
	4	4	15.0333	0.2661
	3	4	14	0.25
	4	3	15.0333	0.2328
	3	4	14.0357	0.2494
	4	4	15.0333	0.2661
	3.1623	4	13.0384	0.2747
	3	4	15.0333	0.2328
	3	4	14.0357	0.2494
	4	4.1231	15.0333	0.2702
	4	4	13	0.3077
	4	3	14.0357	0.2494
	3	4	14.0357	0.2494
	4	3	15.0333	0.2328
	3	4.1231	15	0.2374
	4	4.1231	15.0333	0.2702
	3.1623	4	15.0333	0.2382
	4	4	15.0333	0.2661
	3	4	13.0384	0.2684
	3	4.1231	14.0357	0.2538
	3	4	14.0357	0.2494
	3	4	15.0333	0.2328
	3	4	13	0.2692
	4	4.1231	14.0357	0.2894
	3.1623	4	13	0.2755
	3	4	14.0357	0.2494
	3	4	13	0.2692
	3	4	15.0333	0.2328
	3	4	14.0357	0.2494
	3	4	15.0333	0.2328
	3.1623	3	14.0357	0.2195
	3	4	15.0333	0.2328
	3	4	14.0357	0.2494
	4	4	15.0333	0.2661
	3.1623	3	13.0384	0.2363
	3	4	14.0357	0.2494
	3	4	13.0384	0.2684
	3	4	15.0333	0.2328
	4	3	13.0384	0.2684
	3	3	14.0357	0.2137
	3	3	13.0384	0.2301
	3	3	14.0357	0.2137
	3.1623	4	13	0.2755
	3.1623	3.1623	14.0357	0.2253
	3	3	13.0384	0.2301
	3.1623	4.1231	14.0357	0.2595
	4	3	13	0.2692
	4	4	14.0357	0.285
	4	4.1231	14	0.2901
	4	4	15.0333	0.2661
	4	4	14	0.2857
	4	4	14.0357	0.285
	5	4	14	0.3214
	4	5	14.0357	0.3206
	4	4	14.0357	0.285
	5	4	15	0.3
	5	5	14.0357	0.3562
	5	4	15	0.3
	5	5	14.0357	0.3562
	5	4	15	0.3
	5	5	14.0357	0.3562
	5	4	15	0.3
	5	5	14	0.3571
	5	4	15	0.3
	5	5	14	0.3571
	5	5	15	0.3333
	5	5	14	0.3571
	5.099	5	15	0.3366
	5	5	14.0357	0.3562
	5	5	14	0.3571
	5	5	14	0.3571
	5	5	15	0.3333
	5	5	14	0.3571
	5	5	15	0.3333
	5	5	14.0357	0.3562
	6.0828	5	15	0.3694
	5	5	14.0357	0.3562
	5	5	15	0.3333
	5	5	14	0.3571
	5	5	15	0.3333
	5	5	14	0.3571
	5	6	15	0.3667
	5	5	14	0.3571
	5	5	15	0.3333
	5	5	14	0.3571
	5.099	4	15	0.3033
	5	5	14	0.3571
	5	6	15	0.3667
	5	5	14	0.3571
	5	5	15	0.3333
	5	5	14	0.3571
	5	5	15	0.3333
	5	5	14	0.3571
	6	5	15	0.3667
	4	5	14.0357	0.3206
	6.0828	5	15	0.3694
	4	5	14.0357	0.3206
	5	5	15	0.3333
	4	5	14.0357	0.3206
	4	5	15	0.3
	5	5	14.0357	0.3562
	5	4	15	0.3
	5	5	14.0357	0.3562
	5	5	15	0.3333
	5	5	14.0357	0.3562
	5	5	15	0.3333
	5	5	14.0357	0.3562
	6	5	15	0.3667
	5	5	14	0.3571
	5	5	15	0.3333
	4	5	14.0357	0.3206
	5	5	15	0.3333
	5	5	14	0.3571
	6	5	15	0.3667
	5	5	14	0.3571
	5	5	15	0.3333
	5	5	14.0357	0.3562
	6	5	15	0.3667
	5	5.099	14	0.3607
	5	5	15	0.3333
	5	5	14.0357	0.3562
	6	5	15	0.3667
	4	5	14	0.3214
	5	5	15	0.3333
	4	5	14.0357	0.3206
	5	5	15	0.3333
	5	5	14.0357	0.3562
	6	5	15	0.3667
	5	5	14.0357	0.3562
	5	5	15	0.3333
	5	5	14	0.3571
	6	5	15	0.3667
	5	5	14	0.3571
	5	5	15	0.3333
	5	5	14.0357	0.3562
	5	5	15	0.3333
	5	5	14.0357	0.3562
	6	5	15	0.3667
	5	5	14.0357	0.3562
	5	5	15	0.3333
	5	5	14.0357	0.3562
	5	5	15	0.3333
	5	5	14	0.3571
	5	5	15	0.3333
	5	5	14	0.3571
	5	5	15	0.3333
	5	5	14	0.3571
	6	5	15	0.3667
	5	5	14	0.3571
	6	5	15	0.3667
	5	5	14	0.3571
	6	5	16	0.3438
	5	5	14.0357	0.3562
	6	5	15	0.3667
	5	5	14	0.3571
	5	5	16	0.3125
	5	5	14.0357	0.3562
	5	5	15	0.3333
	5	5	14	0.3571
	6	5	15	0.3667
	5	5	14.0357	0.3562
	5	5	15	0.3333
	5	5	14	0.3571
	5	6	15	0.3667
	5	5	14.0357	0.3562
	6	5	15	0.3667
	5	5	14	0.3571
	6	5	15	0.3667
	5	5	14	0.3571
	5	6.0828	16	0.3463
	5	5	14	0.3571
	5	5	16	0.3125
	5	5	14	0.3571
	5	5	16	0.3125
	5	5.099	14	0.3607
	6	5	16	0.3438
	5	5	14	0.3571
	6	5	15	0.3667
	5	5	14	0.3571
	5	6	16	0.3438
	5	5	14	0.3571
	5	4	16	0.2812
	4	4	14	0.2857
	4	3	14.0357	0.2494
	3	2	14	0.1786
	3	3.1623	14.0357	0.2195
	3	3	14.0357	0.2137
	2	3.1623	14.0357	0.1839
	3	3	14.0357	0.2137
	3.1623	3.1623	14.0357	0.2253
	2	3	14.0357	0.1781
	3	3.1623	14.1421	0.2179
	3	4	14.0357	0.2494
	3	3	15.0333	0.1996
	3	3	13.0384	0.2301
	3	4	15.0333	0.2328
	4	4	14	0.2857
	3	4	15.0333	0.2328
	4	3	14	0.25
	4.1231	4.1231	14.0357	0.2938
	4	4	14	0.2857
	4.1231	4	14.0357	0.2894
	4	4	14	0.2857
	4	5	14.0357	0.3206
	4	4	14.0357	0.285
	4	4	15.0333	0.2661
	4	5	14.0357	0.3206
	5	4	15	0.3
	5	5	14.0357	0.3562
	5	4	16	0.2812
	5	5	14.0357	0.3562
	5	4	15.0333	0.2993
	5	4	14.0357	0.3206
	5	4	15	0.3
	5	4	14	0.3214
	5	4	15	0.3
	5	5	14.0357	0.3562
	5	4	15	0.3
	5	5	14.0357	0.3562
	4	4	15	0.2667
	5	4	14.0357	0.3206
	5	4	15	0.3
	5	4	14.0357	0.3206
	5	4	15	0.3
	5	5	14.0357	0.3562
	5	5	15	0.3333
	5	5	14	0.3571
	5	4	15	0.3
	5	5	14.0357	0.3562
	5	5	16	0.3125
	5	5	14.0357	0.3562
	5	5	16	0.3125
	5	5	14.0357	0.3562
	5.099	5	15	0.3366
	5	5	14	0.3571
	5	5	15	0.3333
	5	4	14	0.3214
	5	4	15	0.3
	5	5	14	0.3571
	5	5	15	0.3333
	5	5	14.0357	0.3562
	5	5	16	0.3125
	5	5	14.0357	0.3562
	5	5	16	0.3125
	4	5	14.0357	0.3206
	4	5	15	0.3
	5	5	14.0357	0.3562
	5	5.099	16	0.3156
	5	5	14	0.3571
	6	5	16	0.3438
	5	5	14.0357	0.3562
	6	5	15	0.3667
	5	5	14	0.3571
	5	5	15	0.3333
	4	5	14.0357	0.3206
	5	5	16	0.3125
	4	5	14.0357	0.3206
	5	5	16	0.3125
	5	5	14.0357	0.3562
	5	5	16	0.3125
	5	5	14.0357	0.3562
	4	5	15	0.3
	5	5	14	0.3571
	5	5	16	0.3125
	5	5	14	0.3571
	5	5.099	15	0.3366
	5	5	14	0.3571
	4	5	15	0.3
	5	5	14	0.3571
	5	5.099	16	0.3156
	5	5	14.0357	0.3562
	5	5	16	0.3125
	5	5	14.0357	0.3562
	5	5	15	0.3333
	5	5	14	0.3571
	5	5.099	16	0.3156
	5	5	14.0357	0.3562
	5	5	16	0.3125
	5	5	14	0.3571
	5	5.099	16	0.3156
	5	5	14.0357	0.3562
	5	5	15	0.3333
	5	5	14	0.3571
	5	5	16	0.3125
	5	5	14	0.3571
	6	5	16	0.3438
	5	5	14.0357	0.3562
	5	5	16	0.3125
	5	5	14.0357	0.3562
	5	5.099	15	0.3366
	5	5	14.0357	0.3562
	5	5	16	0.3125
	5	5	14	0.3571
	5	5	15	0.3333
	5	5	14	0.3571
	5	4	15	0.3
	5	5	14.0357	0.3562
	5	5	15	0.3333
	4	5	14.0357	0.3206
	5	5.099	16	0.3156
	5	5	14.0357	0.3562
	5	5	15	0.3333
	5	5	14.0357	0.3562
	4	5	15	0.3
	5	5	14	0.3571
	5	5	16	0.3125
	5	5	14	0.3571
	4	5	16	0.2812
	5	5	14	0.3571
	5	5	15	0.3333
	5	5	14.0357	0.3562
	5	5	15	0.3333
	4	5	14.0357	0.3206
	5	5	15	0.3333
	5	5	14.0357	0.3562
	5	5	16	0.3125
	4	5	14.0357	0.3206
	5	5.099	15	0.3366
	5	5	14.0357	0.3562
	5	5	16	0.3125
	5	5	14.0357	0.3562
	5	5	15	0.3333
	4	5	14.0357	0.3206
	5	5	16	0.3125
	4	5	14.0357	0.3206
	5	5	15	0.3333
	4	5	14.0357	0.3206
	5	5	16	0.3125
	4	5	14.0357	0.3206
	5	5	15	0.3333
	4	5	14.0357	0.3206
	5	5	16	0.3125
	5	5	14	0.3571
	5	5	15	0.3333
	5	5	14	0.3571
	6	5	16	0.3438
	5	5	14	0.3571
	5	5	16	0.3125
	5	5	14.0357	0.3562
	5	5	16	0.3125
	4	5	14.0357	0.3206
	5	5	15	0.3333
	4	5	14.0357	0.3206
	5	5	15	0.3333
	5	5	14	0.3571
	6	5	16	0.3438
	5	5	15.0333	0.3326
	5	5	16	0.3125
	5	5.099	14	0.3607
	6	5	16	0.3438
	5	5	14.0357	0.3562
	5	5	15	0.3333
	5	5	14	0.3571
	5	5	16	0.3125
	5	5	14	0.3571
	5	5	15	0.3333
	5	5	14	0.3571
	6	5	16	0.3438
	5	5	14	0.3571
	5	5	15	0.3333
	5	5	14	0.3571
	6	5	16	0.3438
	5	5	15	0.3333
	6	5	16	0.3438
	5	5	14.0357	0.3562
	5	5	15	0.3333
	5	5	14.0357	0.3562
	5	5	15	0.3333
	4	5	14.0357	0.3206
	5	5	16	0.3125
	5	5	14	0.3571
	5	5	16	0.3125
	5	5	14	0.3571
	5	5	15	0.3333
	5	5	14	0.3571
	5	5	16	0.3125
	5	5	14	0.3571
	4	5	15	0.3
	5	5.099	14.0357	0.3598
	5	5	16	0.3125
	4	5	14.0357	0.3206
	5	5.099	16	0.3156
	5	5	14.0357	0.3562
	5	5	16	0.3125
	5	5	14	0.3571
	4	5	16	0.2812
	5	5	14	0.3571
	5	5.099	16	0.3156
	5	5	14	0.3571
	5	5	16	0.3125
	5	5	14	0.3571
	5	5	15	0.3333
	5	5	14.0357	0.3562
	5	5	15	0.3333
	5	5.099	14.0357	0.3598
	5	5	16	0.3125
	5	5	14	0.3571
	5	5	15	0.3333
	5	5	14	0.3571
	5	5	16	0.3125
	5	6	14	0.3929
	5	5	16	0.3125
	5	6	14	0.3929
	5	5	15	0.3333
	5	4	14	0.3214
	5	5.099	16	0.3156
	5	5	14	0.3571
	4	5	15	0.3
	5	5	14	0.3571
	4	5	15	0.3
	5	5	14	0.3571
	5	5	15	0.3333
	5	6	14	0.3929
	5	5	16	0.3125
	5	5	14	0.3571
	5	5	16	0.3125
	5	5	14	0.3571
	5	4	15	0.3
	5	4	14	0.3214
	5	4	15	0.3
	5	5	14	0.3571
	5	5	15	0.3333
	5	5.099	14.0357	0.3598
	5	5	15	0.3333
	5	5	14.0357	0.3562
	5	5	16	0.3125
	5	5	14	0.3571
	5	5	15	0.3333
	5	5	14	0.3571
	4	4	15	0.2667
	5	4	14	0.3214
	5	4.1231	16	0.2851
	5	4	14	0.3214
	5	4.1231	16	0.2851
	5	5	14	0.3571
	5	5	15	0.3333
	5	6	14	0.3929
	5	5	15	0.3333
	5	5	14	0.3571
	5	5	16	0.3125
	5	5	14	0.3571
	5	5	15	0.3333
	4	5	14	0.3214
	5	5	15	0.3333
	4	5	14	0.3214
	5	5	15	0.3333
	5	5	14	0.3571
	5	5	15	0.3333
	5	4	14	0.3214
	5	4	15	0.3
	5	5.099	14	0.3607
	5	5	15	0.3333
	5	5	14	0.3571
	5	5	15	0.3333
	4	4	14	0.2857
	5	4	15	0.3
	5	5	14	0.3571
	5	5	15.0333	0.3326
	4	5	14	0.3214
	5	5	15	0.3333
	4	5	14	0.3214
	5	5	15	0.3333
	5	5	15.0333	0.3326
	5	5	16	0.3125
	5	5	14	0.3571
	5	5	15	0.3333
	5	5	14	0.3571
	5	5	15	0.3333
	5	5	15	0.3333
	5	5	15	0.3333
	4	5	15	0.3
	5	4	15	0.3
	4	5	14	0.3214
	5.099	4	15	0.3033
	4	5	14.0357	0.3206
	4	5	15.0333	0.2993
	5	4	14	0.3214
	5	5	15	0.3333
	5	5	14.0357	0.3562
	4.1231	5	15	0.3041
	4	5	14.0357	0.3206
	5	5.099	15.0333	0.3359
	4	5	14	0.3214
	5	5	15.0333	0.3326
	4	5	14	0.3214
	5	5	14.0357	0.3562
	5	5	14	0.3571
	5	4.1231	15.0333	0.3034
	4	5	14.0357	0.3206
	5	5	15.0333	0.3326
	5	5	14	0.3571
	5.099	5	15	0.3366
	4	5	14.0357	0.3206
	5	5	15.0333	0.3326
	4	5	14.0357	0.3206
	5.099	5	15.0333	0.3359
	5	5.099	15	0.3366
	5	5	16.0312	0.3119
	5	5	14	0.3571
	4	5	15	0.3
	5	5	14	0.3571
	5.099	5	15	0.3366
	4	5	14.0357	0.3206
	5.099	5	15.0333	0.3359
	5	5	14.0357	0.3562
	5	5.099	16.0312	0.315
	5	5	15.0333	0.3326
	5	5.099	15	0.3366
	5	5	15.0333	0.3326
	5	5	16	0.3125
	5	5	14.0357	0.3562
	5	5	15	0.3333
	5	5	14.0357	0.3562
	5	5	15.0333	0.3326
	5	5	14.0357	0.3562
	4.1231	5	15	0.3041
	5	5	14	0.3571
	5	5	15.0333	0.3326
	4	5	14.0357	0.3206
	5	4	15.0333	0.2993
	4	4	14.0357	0.285
	4.1231	4.1231	14.0357	0.2938
	3	3	13.0384	0.2301
	3.1623	3	14.1421	0.2179
	2	3	13.1529	0.1901
	2	2.2361	14.1421	0.1498
	2	2	13.1529	0.1521
	2.2361	2	13.1529	0.161
	2.2361	2	13.1529	0.161
	2.2361	3.1623	14.1421	0.1909
	2	2	14.1421	0.1414
	1.4142	2.2361	15.2971	0.1193
	2	2	13.1529	0.1521
	2	2	14.1421	0.1414
	2.2361	1	13.1529	0.123
	2.2361	2.2361	15.1327	0.1478
	2	2.2361	14.1421	0.1498
	1.4142	2.2361	14.1421	0.1291
	1	1	13.1529	0.076
	1	1.4142	14.3178	0.0843
	2	2.2361	14.1421	0.1498
	2.2361	2.2361	14.1421	0.1581
	2	2.2361	13.3417	0.1588
	2	2.2361	14.3178	0.1479
	2	2.2361	13.3417	0.1588
	2.2361	2	14.1421	0.1498
	2	2	14.1421	0.1414
	2.2361	2.2361	15.1327	0.1478
	2	1.4142	14.1421	0.1207
	2	2.2361	14.1421	0.1498
	2	2	13.0384	0.1534
	2	2	14.3178	0.1397
	2.2361	2	13.1529	0.161
	2	2.2361	14.3178	0.1479
	2.2361	2	13.1529	0.161
	2.2361	2.2361	14.3178	0.1562
	2	2	13.3417	0.1499
	2	2.2361	14.3178	0.1479
	2	2.2361	12.1655	0.1741
	2	2	14.1421	0.1414
	2	2	14.3178	0.1397
	2.2361	2	15.1327	0.14
	3	2	14.1421	0.1768
	3.1623	3.1623	15.1327	0.209
	2.2361	3	14.0357	0.1865
	2	2	15.1327	0.1322
	3	2	14.0357	0.1781
	3.1623	3	14.1421	0.2179
	3	3	14.0357	0.2137
	3	3	15.0333	0.1996
	3	4	14	0.25
	4	4	15.0333	0.2661
	4	3	14.0357	0.2494
	4	4	15.0333	0.2661
	4	4	13	0.3077
	4	4	15.0333	0.2661
	4	4	14.0357	0.285
	4	4	15.0333	0.2661
	4	4	14.0357	0.285
	4.1231	4	15.0333	0.2702
	4	4	14.0357	0.285
	4	4	15.0333	0.2661
	5.099	4	14	0.325
	4.1231	4	15.0333	0.2702
	5	5	15.0333	0.3326
	4	5	15	0.3
	4	4	14	0.2857
	4	4	15.0333	0.2661
	4	5	14.0357	0.3206
	4	5	15.0333	0.2993
	5	4	14	0.3214
	4	4	15	0.2667
	5	4	14	0.3214
	5	4	15.0333	0.2993
	4	4	14	0.2857
	5	4	15.0333	0.2993
	4	4	14	0.2857
	5	4	15.0333	0.2993
	4	4.1231	15	0.2708
	5	4.1231	15.0333	0.3034
	4	4	14	0.2857
	4	5	15	0.3
	5	5	14.0357	0.3562
	4	5	15	0.3
	4	5	14	0.3214
	5	5	15	0.3333
	4	5	14.0357	0.3206
	4	4	16.0312	0.2495
	4	5	15	0.3
	5	4.1231	16.0312	0.2845
	5	5	15	0.3333
	5	4	16.0312	0.2807
	4	5	15	0.3
	5	4	16.0312	0.2807
	5	5	14	0.3571
	5.099	4	15.0333	0.3026
	5	5	14	0.3571
	5	4	15.0333	0.2993
	4.1231	5	15	0.3041
	5	4	15.0333	0.2993
	5.099	5	15	0.3366
	5	5	16.0312	0.3119
	5.099	5	15	0.3366
	5	5.099	16.0312	0.315
	5.099	5	15	0.3366
	5	5	16.0312	0.3119
	5	5	14	0.3571
	5	4	15.0333	0.2993
	5	5	15	0.3333
	5	4	15.0333	0.2993
	5	5	15	0.3333
	5	4	16.0312	0.2807
	5	5	15	0.3333
	5	4.1231	16.0312	0.2845
	5.099	5	14	0.3607
	5	4	16.0312	0.2807
	5.099	5	14	0.3607
	4	5	15	0.3
	4	5	14	0.3214
	5	5	15	0.3333
	5	5	14	0.3571
	5	5	15	0.3333
	4	5	14.0357	0.3206
	5	5	16	0.3125
	5	5	14	0.3571
	5	4	16.0312	0.2807
	5	5	14	0.3571
	5	5	16.0312	0.3119
	5	5.099	15	0.3366
	5	5.099	16.0312	0.315
	5	5	14	0.3571
	4	5	16.0312	0.2807
	5	4	14	0.3214
	5	5	15.0333	0.3326
	5	5	14	0.3571
	4	5	15.0333	0.2993
	5	4	14	0.3214
	5	5	15.0333	0.3326
	4	5	14.0357	0.3206
	5.099	5	15.0333	0.3359
	4	5	14	0.3214
	5	5	16	0.3125
	4	5	14	0.3214
	5	5	15	0.3333
	5	5	14	0.3571
	5.099	5	15.0333	0.3359
	4	5	14	0.3214
	5	5	15	0.3333
	4	5	14	0.3214
	5	5	16	0.3125
	5	6	14	0.3929
	5	5	16	0.3125
	5	5	14	0.3571
	5	5	15	0.3333
	5	5	14	0.3571
	5	5	15.0333	0.3326
	5	5	14	0.3571
	5	5	15.0333	0.3326
	5	5	14	0.3571
	5	5	15	0.3333
	5	5	14	0.3571
	6	5	15	0.3667
	5	5	14	0.3571
	5.099	5	15.0333	0.3359
	5	5	14	0.3571
	5.099	5	15.0333	0.3359
	5	5.099	15	0.3366
	5.099	4	15.0333	0.3026
	5	5	14	0.3571
	5	5.099	15.0333	0.3359
	5.099	5	14	0.3607
	5	5.099	15.0333	0.3359
	5	5	14.0357	0.3562
	5	5	15.0333	0.3326
	5	4	14	0.3214
	5	5.099	15.0333	0.3359
	4	5	14.0357	0.3206
	5	5	15.0333	0.3326
	4	5	14.0357	0.3206
	5	5	15.0333	0.3326
	5.099	5	13	0.3884
	4	5	15.0333	0.2993
	5.099	4	14	0.325
	5	5	15.0333	0.3326
	4	4	14	0.2857
	5	4	14.0357	0.3206
	4	5	14.0357	0.3206
	5	5.099	16.0312	0.315
	5	5	14	0.3571
	4.1231	4	15.0333	0.2702
	5	4	14	0.3214
	5	5	15.0333	0.3326
	5	5	14	0.3571
	5	5	15.0333	0.3326
	4	5	14.0357	0.3206
	5	5	15	0.3333
	5	5	14.0357	0.3562
	4	5	15	0.3
	5	5	14.0357	0.3562
	4.1231	5	15	0.3041
	5	5	14	0.3571
	5	4.1231	15.0333	0.3034
	4	4	14	0.2857
	5.099	4	15.0333	0.3026
	5	4	14	0.3214
	5.099	4	15.0333	0.3026
	5	5	14	0.3571
	5	5	15.0333	0.3326
	5	5	14	0.3571
	5	5	15.0333	0.3326
	5	5	14	0.3571
	5	5	15.0333	0.3326
	5	5	14	0.3571
	5	5	15.0333	0.3326
	5	4	14	0.3214
	5.099	4	15.0333	0.3026
	5	4	14	0.3214
	5.099	4	15.0333	0.3026
	5	4	14	0.3214
	5	4	15.0333	0.2993
	5	4	14	0.3214
	5.099	4	15.0333	0.3026
	5	5	14	0.3571
	5	4	15.0333	0.2993
	5	4	14	0.3214
	4	5	15	0.3
	5	4	14	0.3214
	5.099	5	15.0333	0.3359
	5	4	14	0.3214
	5.099	4	15.0333	0.3026
	5	5	14	0.3571
	4	5	15	0.3
	5	5	14	0.3571
	4.1231	5	15	0.3041
	5	5	14	0.3571
	4.1231	5	15	0.3041
	5	5	14	0.3571
	5	5	15.0333	0.3326
	5	4	14	0.3214
	5.099	4	15.0333	0.3026
	5	4	14	0.3214
	5.099	4	15.0333	0.3026
	5	5	14	0.3571
	5.099	5	15.0333	0.3359
	5	4	14	0.3214
	4.1231	5	15	0.3041
	4.1231	4	13	0.3124
	3.1623	4	14.0357	0.2551
	3	3	13	0.2308
	3.1623	3	14.1421	0.2179
	2	3	13.0384	0.1917
	3.1623	3.1623	14.0357	0.2253
	3	2	13.0384	0.1917
	3	3	14.1421	0.2121
	3	2	14.0357	0.1781
	3	3	15.1327	0.1982
	3	4	13.0384	0.2684
	3.1623	4.1231	14.1421	0.2576
	4.1231	3	13	0.274
	4.1231	3.1623	14.0357	0.2595
	4	3	13	0.2692
	4.1231	3.1623	14.0357	0.2595
	4.1231	4	13	0.3124
	4.1231	4.1231	14.0357	0.2938
	4	4	13	0.3077
	3.1623	4	14.0357	0.2551
	4.1231	4	13	0.3124
	4.1231	4.1231	14.0357	0.2938
	4	4	13	0.3077
	4.1231	4.1231	14.0357	0.2938
	4	4	13	0.3077
	4.1231	4.1231	14.0357	0.2938
	4	4	13	0.3077
	5.099	4.1231	14.0357	0.3285
	4	4	14	0.2857
	4	4	15.0333	0.2661
	5	4.1231	13	0.3509
	4	4	14.0357	0.285
	5	4	14	0.3214
	4	4	15	0.2667
	5	4	13	0.3462
	4	4	15.0333	0.2661
	4	4.1231	13	0.3124
	4	4	15.0333	0.2661
	4	4.1231	13	0.3124
	5	4	15.0333	0.2993
	4	4	13	0.3077
	5	4	15.0333	0.2993
	4	4.1231	13	0.3124
	4	4.1231	14	0.2901
	4	4	13	0.3077
	4	4	14	0.2857
	4	4	13	0.3077
	4	4	15	0.2667
	4	4	13.0384	0.3068
	4	4	15	0.2667
	4	4	14	0.2857
	4	4	15	0.2667
	4	4	14	0.2857
	4	4	15	0.2667
	5	4	14	0.3214
	4	5	15	0.3
	4	4	14	0.2857
	4	5	15	0.3
	4	4	14	0.2857
	4	5	15	0.3
	4	4	13	0.3077
	4	4	15.0333	0.2661
	4	4	14	0.2857
	5	4.1231	16	0.2851
	4	4	14	0.2857
	4	4	15	0.2667
	4	4	14.0357	0.285
	4	4	15	0.2667
	5	4	14	0.3214
	4	5	14	0.3214
	5	4	14	0.3214
	4	4	15	0.2667
	5	4	14	0.3214
	4	5	15	0.3
	5	4	14	0.3214
	4	5	15	0.3
	4	4	14	0.2857
	4	4	15	0.2667
	4	4	14	0.2857
	4	4	15	0.2667
	5	4	14	0.3214
	4	5	15	0.3
	4	4	14	0.2857
	4	4	15	0.2667
	4	4	14	0.2857
	4	5	15	0.3
	4	4	14	0.2857
	4	5	15	0.3
	4	4	14	0.2857
	4	5.099	14	0.325
	4	4	13	0.3077
	5	4	15.0333	0.2993
	4	4	14	0.2857
	4	5	15	0.3
	4	4	14	0.2857
	4	4	15	0.2667
	5	4	13	0.3462
	4	5	15	0.3
	4	4	13	0.3077
	4	5	15	0.3
	4	4	14	0.2857
	4	5	15	0.3
	5	4	14	0.3214
	4	5	15	0.3
	4	4	14	0.2857
	4	5	15	0.3
	4	4.1231	13	0.3124
	4	4	15	0.2667
	5	4	14	0.3214
	5	4	15.0333	0.2993
	4	4	14	0.2857
	4	4	14	0.2857
	4	4	14	0.2857
	4	4	15	0.2667
	5	4	14	0.3214
	5	4.1231	15.0333	0.3034
	5	4	14	0.3214
	4	5.099	15	0.3033
	5	4	14	0.3214
	4	5	14	0.3214
	4	4	14	0.2857
	5	4.1231	14.0357	0.325
	4	4	14	0.2857
	5	4	14.0357	0.3206
	4	4	13	0.3077
	4	4.1231	14	0.2901
	5	4	14	0.3214
	4	5.099	14	0.325
	5	4	14	0.3214
	4	5	15	0.3
	4	4.1231	13	0.3124
	4	4	15	0.2667
	4	4	14	0.2857
	4	4	15	0.2667
	4	4	14	0.2857
	4	4	15	0.2667
	4	4	13	0.3077
	4	4	15	0.2667
	4	4	14	0.2857
	4	4	14	0.2857
	4	4	14	0.2857
	4	5	15	0.3
	4	4	13	0.3077
	4	5	15	0.3
	4	4	14	0.2857
	4	5.099	14	0.325
	4	4	14	0.2857
	4	4.1231	14	0.2901
	5	4	14	0.3214
	4	5.099	14	0.325
	4	4	13	0.3077
	4	4.1231	14	0.2901
	4	4	14	0.2857
	5.099	4	15.0333	0.3026
	4	4.1231	13	0.3124
	4	4	15	0.2667
	4	4	13	0.3077
	4	4	14	0.2857
	4	4	14	0.2857
	4	4	15	0.2667
	4	4	13	0.3077
	4	4	14	0.2857
	4	4	13	0.3077
	5	4	14.0357	0.3206
	4.1231	4	13	0.3124
	4	4	14	0.2857
	4	4	13	0.3077
	4	4	15	0.2667
	5	4	13	0.3462
	4	4.1231	14.0357	0.2894
	4	4	13	0.3077
	4	5.099	14	0.325
	5	4	14	0.3214
	4	5.099	14	0.325
	4	4	14	0.2857
	4	4	15	0.2667
	4	4	13	0.3077
	4	4	14	0.2857
	5	4	14	0.3214
	4	4	15	0.2667
	4	4	13	0.3077
	5	4.1231	14.0357	0.325
	4	4	13	0.3077
	4.1231	4	14	0.2901
	4	4	13	0.3077
	4.1231	5	14	0.3258
	4	4	14	0.2857
	4	4	14	0.2857
	4	4	14	0.2857
	4	4.1231	14	0.2901
	4	5	13	0.3462
	5	4	14	0.3214
	4	4	14	0.2857
	5	4	15	0.3
	4	4	14	0.2857
	4	4	14	0.2857
	5	4	14	0.3214
	4	5	15	0.3
	4	4	13	0.3077
	4	4	14	0.2857
	4	4	13	0.3077
	4	5	15	0.3
	4	4	13.0384	0.3068
	4	4.1231	14	0.2901
	4	4	14	0.2857
	4	4	15	0.2667
	4	4	14	0.2857
	4	4	15	0.2667
	5	4	14	0.3214
	4	5	15	0.3
	5	4	14	0.3214
	4	5	15	0.3
	5	4	14	0.3214
	4	5.099	14	0.325
	4	4	14	0.2857
	4	4	14	0.2857
	4	4	13.0384	0.3068
	4	5.099	14	0.325
	4	4	13	0.3077
	4	4.1231	14	0.2901
	4	4	14	0.2857
	4	4	15	0.2667
	4	4	13	0.3077
	4	5	14	0.3214
	4	4	14	0.2857
	4	4	14	0.2857
	4	4	13	0.3077
	4	4	14	0.2857
	4	4	13	0.3077
	4	4.1231	14	0.2901
	5	4	14	0.3214
	4	4	15	0.2667
	4	4	13	0.3077
	4	4.1231	14	0.2901
	4	4	14	0.2857
	4	4	14.0357	0.285
	4	4	14	0.2857
	4	4	15	0.2667
	4	4	13	0.3077
	4	4	15	0.2667
	4	4	13	0.3077
	4	4.1231	14	0.2901
	5	4	13	0.3462
	4	5.099	14	0.325
	5	4	14	0.3214
	5	4.1231	16	0.2851
	4	4	14	0.2857
	4	4	14	0.2857
	5	4	13	0.3462
	5	4.1231	14.0357	0.325
	4	4	14	0.2857
	4	5	15	0.3
	5	4	14	0.3214
	4	5	14	0.3214
	4	4	14	0.2857
	4	5.099	14	0.325
	4	4	14.0357	0.285
	5	4.1231	14.0357	0.325
	5	4	14	0.3214
	4	5.099	14	0.325
	4	4	14.0357	0.285
	4	4.1231	14.0357	0.2894
	4	4	14.0357	0.285
	4	5.099	16	0.2843
	5	4	14	0.3214
	4	5	15	0.3
	4	4	14	0.2857
	4	5.099	14	0.325
	4	4	14	0.2857
	4	4	14	0.2857
	4	4	14.0357	0.285
	4	4	14.0357	0.285
	4	4	13.0384	0.3068
	4	4	14	0.2857
	4	4	13	0.3077
	4	4.1231	14	0.2901
	3	3	13.0384	0.2301
	3.1623	3	14.0357	0.2195
	2	3	13.0384	0.1917
	2	2	14.1421	0.1414
	2	3	13.0384	0.1917
	3	3	13.0384	0.2301
	3	4	13.0384	0.2684
	3	3	14.0357	0.2137
	4	4.1231	13.0384	0.3115
	4.1231	3.1623	14.0357	0.2595
	4	3	13.0384	0.2684
	4	4	14.0357	0.285
	4	4.1231	13	0.3124
	4.1231	4.1231	14.0357	0.2938
	4	4	13.0384	0.3068
	4	4.1231	14.0357	0.2894
	4.1231	5	13.0384	0.3499
	5	4.1231	14.0357	0.325
	4	5	13.0384	0.3451
	4.1231	4.1231	14.0357	0.2938
	4	4	13.0384	0.3068
	5.099	4.1231	14.0357	0.3285
	4	5	13.0384	0.3451
	5	4	14.0357	0.3206
	4	5	14.0357	0.3206
	4.1231	4	14	0.2901
	4	4.1231	13.0384	0.3115
	4.1231	4	14	0.2901
	4	4	14	0.2857
	4	4	14	0.2857
	4	4	13.0384	0.3068
	4	4.1231	14.0357	0.2894
	4	5	13.0384	0.3451
	4	4	14.0357	0.285
	4	4	14.0357	0.285
	4.1231	4	14	0.2901
	4	4	14.0357	0.285
	4.1231	4	14.0357	0.2894
	4	4	13.0384	0.3068
	5	4.1231	14.0357	0.325
	4	5	13.0384	0.3451
	4	4	15	0.2667
	4	4	14.0357	0.285
	4	4.1231	14	0.2901
	4	4	13.0384	0.3068
	5	4	14.0357	0.3206
	4	4	14.0357	0.285
	4	4	14	0.2857
	4	5	14.0357	0.3206
	5	4.1231	14.0357	0.325
	4	4	14.0357	0.285
	4.1231	4	14	0.2901
	4	4	14	0.2857
	4	4.1231	14	0.2901
	4	4	13	0.3077
	4.1231	4	14	0.2901
	4	4	13	0.3077
	4.1231	4	15	0.2708
	4	4	14.0357	0.285
	4.1231	4	14	0.2901
	4	5	14.0357	0.3206
	5	4	14.0357	0.3206
	4	5	14.0357	0.3206
	4	4.1231	14.0357	0.2894
	4	4	14.0357	0.285
	4	4.1231	14	0.2901
	4	4	14.0357	0.285
	4	5	15	0.3
	4	4	14	0.2857
	4.1231	4	15	0.2708
	4	4	14	0.2857
	4	4	15	0.2667
	4	4	14	0.2857
	4.1231	4	15	0.2708
	4	4	13.0384	0.3068
	4	4.1231	14	0.2901
	4	4	13.0384	0.3068
	4	4.1231	14	0.2901
	4	5	14.0357	0.3206
	5	4.1231	15.0333	0.3034
	4	4	14.0357	0.285
	4	5	15	0.3
	4	5	14.0357	0.3206
	4	5	15	0.3
	4	4	14.0357	0.285
	4.1231	4	15	0.2708
	4	4	14	0.2857
	5	4.1231	14.0357	0.325
	4	5	14.0357	0.3206
	5	4.1231	15.0333	0.3034
	5	5	14	0.3571
	5	5	15	0.3333
	4	5	14.0357	0.3206
	5	4	15.0333	0.2993
	4	4	14	0.2857
	4.1231	4	15	0.2708
	4	5	14.0357	0.3206
	4.1231	4	14.0357	0.2894
	4	4	14.0357	0.285
	4.1231	4	15	0.2708
	4	4	14	0.2857
	4	4	15	0.2667
	4	5	14.0357	0.3206
	5	4	15.0333	0.2993
	4	5	14.0357	0.3206
	5	4	15.0333	0.2993
	4	5	14.0357	0.3206
	5	4	15.0333	0.2993
	4	5	13.0384	0.3451
	5	4	14.0357	0.3206
	4	5	14.0357	0.3206
	4	4	15	0.2667
	4	4	14	0.2857
	4.1231	5	15	0.3041
	4	4	14.0357	0.285
	4.1231	4	15	0.2708
	4	4	14.0357	0.285
	4	4	14.0357	0.285
	4	4	14.0357	0.285
	4	4.1231	14.0357	0.2894
	4	4	14	0.2857
	4	4	14	0.2857
	4	4	14	0.2857
	4	4.1231	14	0.2901
	4	4	14	0.2857
	4	5	15	0.3
	4	4	14	0.2857
	4	4.1231	15	0.2708
	4	4	14.0357	0.285
	4	4.1231	15	0.2708
	4	5	14.0357	0.3206
	4.1231	4	15.0333	0.2702
	4	4	14.0357	0.285
	5	4	15.0333	0.2993
	5	4	14.0357	0.3206
	4	5	15	0.3
	4	4	14.0357	0.285
	4	5.099	14	0.325
	4	4	14	0.2857
	4	5.099	15	0.3033
	4	5	14.0357	0.3206
	4	5	15	0.3
	4	5	14.0357	0.3206
	4	4	15.0333	0.2661
	4	5	14.0357	0.3206
	5	4.1231	15	0.3041
	4	4	14.0357	0.285
	4	5.099	14	0.325
	4	5	14.0357	0.3206
	4	5	15	0.3
	4	5	14.0357	0.3206
	4	5.099	15	0.3033
	4	4	13	0.3077
	4	4	15	0.2667
	4	5	14.0357	0.3206
	4	4.1231	14.0357	0.2894
	4	5	14.0357	0.3206
	5	4	15.0333	0.2993
	4	5	14.0357	0.3206
	4	4	15	0.2667
	4	5	14.0357	0.3206
	4.1231	4	15	0.2708
	4	5	14.0357	0.3206
	4	5	15	0.3
	4	5	13.0384	0.3451
	4.1231	4	15	0.2708
	4	4	13.0384	0.3068
	4.1231	4	15	0.2708
	4	4	13.0384	0.3068
	4	4.1231	14	0.2901
	4	5	14.0357	0.3206
	5	4.1231	15.0333	0.3034
	4	5	14.0357	0.3206
	5	4	15.0333	0.2993
	4	5	13.0384	0.3451
	5.099	4	15.0333	0.3026
	4	5	14.0357	0.3206
	4	4.1231	15	0.2708
	4	5	14.0357	0.3206
	4	4	15	0.2667
	4	5	14.0357	0.3206
	4	4	15	0.2667
	4	5	14.0357	0.3206
	4	4	15	0.2667
	4	5	14.0357	0.3206
	5.099	4	15.0333	0.3026
	4	5	14.0357	0.3206
	4	4.1231	15	0.2708
	4	5	14.0357	0.3206
	5.099	4	15.0333	0.3026
	4	5	14.0357	0.3206
	4	5	15	0.3
	4	5	14.0357	0.3206
	4.1231	5	15	0.3041
	4	4	13	0.3077
	5.099	4	15.0333	0.3026
	4	5	14.0357	0.3206
	5.099	4	15.0333	0.3026
	4	5	14.0357	0.3206
	4.1231	4	15.0333	0.2702
	4	5	14.0357	0.3206
	4.1231	5	15	0.3041
	4	4	14	0.2857
	4	4	15	0.2667
	4	4	14	0.2857
	4	4	15	0.2667
	4	4	14	0.2857
	4	5	15	0.3
	4	5	14.0357	0.3206
	4.1231	4	15	0.2708
	4	5	14.0357	0.3206
	5	4	15.0333	0.2993
	4	5	14.0357	0.3206
	5	5.099	15.0333	0.3359
	4	5	14.0357	0.3206
	5	4	15.0333	0.2993
	4	5	13.0384	0.3451
	4.1231	4	15	0.2708
	4	5	13.0384	0.3451
	4.1231	4	15	0.2708
	4	5	14.0357	0.3206
	4	4	15	0.2667
	4	4	14	0.2857
	4	4	15	0.2667
	4	4	13.0384	0.3068
	4	4	15	0.2667
	4	5	14.0357	0.3206
	5	4.1231	15.0333	0.3034
	5	4	14	0.3214
	5	5.099	15.0333	0.3359
	4	5	14.0357	0.3206
	5	5.099	15.0333	0.3359
	4	4	13	0.3077
	4.1231	5	15.0333	0.3034
	4	5	13.0384	0.3451
	5	4	15.0333	0.2993
	4	4	13	0.3077
	4	4.1231	14	0.2901
	4.1231	5	14.0357	0.325
	5	4	15.0333	0.2993
	5	5	14	0.3571
	5	5	15	0.3333
	4	5	13.0384	0.3451
	4	5.099	14	0.325
	4	5	13.0384	0.3451
	4	5.099	14	0.325
	5	4	14	0.3214
	4	5	15	0.3
	5	4	14	0.3214
	4	5	15	0.3
	5	4	14.0357	0.3206
	4	5.099	15.0333	0.3026
	5	4	14.0357	0.3206
	4	5	15.0333	0.2993
	4	4	14	0.2857
	4	5	15	0.3
	5	4	14	0.3214
	5.099	4	15.0333	0.3026
	4	4	14	0.2857
	4	4	15.0333	0.2661
	4	4	14	0.2857
	4	5	15.0333	0.2993
	4	5	14.0357	0.3206
	4	5	15.0333	0.2993
	4	4	14.0357	0.285
	4.1231	5	15.0333	0.3034
	5.099	4	13.0384	0.3489
	4	5	15.0333	0.2993
	4.1231	4	13	0.3124
	5	4	15.0333	0.2993
	4	4	14	0.2857
	5	4	15.0333	0.2993
	4	5	14.0357	0.3206
	5	4.1231	15.0333	0.3034
	4	4	14.0357	0.285
	5.099	4	15.0333	0.3026
	4	5	13	0.3462
	5	4	15	0.3
	4	4	14	0.2857
	5	4	15.0333	0.2993
	4	5	14.0357	0.3206
	5	4	15.0333	0.2993
	4.1231	4	14.0357	0.2894
	4	4.1231	16	0.2538
	4	4	13.0384	0.3068
	4.1231	4.1231	14	0.2945
	5	4	14.0357	0.3206
	4	5	15	0.3
	5	4	14	0.3214
	4.1231	5	15	0.3041
	5	4	14	0.3214
	4	5	15	0.3
	5	5	14	0.3571
	4	5	15	0.3
	4	5	14	0.3214
	4.1231	5	15	0.3041
	5	5.099	14.0357	0.3598
	4.1231	5	15	0.3041
	5	5	14	0.3571
	5	4.1231	15	0.3041
	5	5	14	0.3571
	5	5	15	0.3333
	5	5	14.0357	0.3562
	5	5	15	0.3333
	5	5	14.0357	0.3562
	5	5	15.0333	0.3326
	5	5	14.0357	0.3562
[truncated: 8,633 more rows]

## Sheet: eyeblink8-8
	A	B	C	EAR
	5.099	5	16	0.3156
	4	5.099	17.2627	0.2635
	5	4.1231	18.0278	0.253
	5.099	4.1231	17.2627	0.2671
	4	4.1231	18.0278	0.2253
	5.099	4.1231	17.2627	0.2671
	5	4.1231	18.0278	0.253
	5.099	5.099	17.2627	0.2954
	5	4.1231	18	0.2534
	4.1231	5.099	17.1172	0.2694
	5	4	18.0278	0.2496
	5.099	5	17.2627	0.2925
	5.099	4.1231	18.0278	0.2558
	5	4.1231	18.2483	0.25
	5.099	4.1231	18	0.2562
	4.1231	5	18.1108	0.2519
	5.099	4.1231	18.0278	0.2558
	5.099	5	18.1108	0.2788
	5	4	17.0294	0.2642
	5.099	5.099	17.1172	0.2979
	5	5	17	0.2941
	4.1231	5	17.1172	0.2665
	5	5	18	0.2778
	4.1231	5.099	17.2627	0.2671
	5	4	17	0.2647
	4.1231	5.099	17.2627	0.2671
	5	5	17.0294	0.2936
	5.099	5.099	18.2483	0.2794
	5.099	5.099	18.0278	0.2828
	5.099	5	17.2627	0.2925
	5	5	17	0.2941
	4.1231	5	17.2627	0.2642
	5	5.099	18.0278	0.2801
	4.1231	5.099	18.2483	0.2527
	5	5.099	18	0.2805
	5.099	5	18.2483	0.2767
	5	5.099	18.0278	0.2801
	4.1231	5.099	18.2483	0.2527
	5.099	5.099	18.0278	0.2828
	5.099	5.099	18.2483	0.2794
	4.1231	5.099	18.0278	0.2558
	5.099	5.099	18.2483	0.2794
	4.1231	4	18.0278	0.2253
	5.099	5.099	18.2483	0.2794
	5.099	5	18.0278	0.2801
	5	6.0828	18.2483	0.3037
	5.099	5	18.0278	0.2801
	5	5.099	18.2483	0.2767
	4	4.1231	18.0278	0.2253
	4.1231	4.1231	18.1108	0.2277
	3	2	18	0.1389
	2	3	18.2483	0.137
	3	2	18.0278	0.1387
	2	3	18.1108	0.138
	3	3	18	0.1667
	3	3	18.1108	0.1656
	4	3	18.0278	0.1941
	4.1231	4	18.2483	0.2226
	4.1231	4	18.0278	0.2253
	4.1231	4	18.2483	0.2226
	5	4	18	0.25
	4.1231	5	18.2483	0.25
	5	4	18	0.25
	4.1231	5	17.2627	0.2642
	5	5	18.0278	0.2774
	4.1231	5	18.2483	0.25
	5	4	17.0294	0.2642
	4.1231	5.099	17.2627	0.2671
	4	5	18.0278	0.2496
	4.1231	5.099	18.2483	0.2527
	4	4	18.0278	0.2219
	4.1231	4	17.2627	0.2353
	4	4	18.0278	0.2219
	5.099	4	18.2483	0.2493
	4	4	17.0294	0.2349
	5.099	5.099	17.2627	0.2954
	5	4	17	0.2647
	5.099	5.099	17.1172	0.2979
	5	4	17.0294	0.2642
	5.099	5.099	17.2627	0.2954
	5	4	17.0294	0.2642
	5.099	5.099	17.2627	0.2954
	5	4	18.0278	0.2496
	5.099	5.099	17.2627	0.2954
	5	4	17	0.2647
	4.1231	5.099	17.1172	0.2694
	5	4	17.0294	0.2642
	5	5.099	18.1108	0.2788
	5.099	4.1231	18	0.2562
	5.099	5	18.1108	0.2788
	5	4.1231	18	0.2534
	4.1231	5	18.1108	0.2519
	5	5.099	18	0.2805
	5.099	5.099	18.1108	0.2815
	5	4.1231	18.0278	0.253
	4.1231	5	18.1108	0.2519
	5	4.1231	18.0278	0.253
	5	5.099	18.1108	0.2788
	5	4	18	0.25
	4	5.099	18.2483	0.2493
	5.099	4.1231	18.0278	0.2558
	5	5.099	18.1108	0.2788
	5	5.099	18	0.2805
	4.1231	5.099	18.2483	0.2527
	5	4	18.0278	0.2496
	4.1231	5.099	18.2483	0.2527
	5	5	18.0278	0.2774
	4.1231	5	18.2483	0.25
	5	4	17.0294	0.2642
	5.099	5	17.1172	0.295
	5	4	17	0.2647
	4.1231	5	17.2627	0.2642
	5	5	17	0.2941
	5.099	5.099	17.1172	0.2979
	5	4	17.0294	0.2642
	5.099	5.099	17.1172	0.2979
	4	4	18.0278	0.2219
	5.099	5.099	19.105	0.2669
	5	4	17.0294	0.2642
	5.099	4.1231	18.1108	0.2546
	4	4.1231	18.0278	0.2253
	5.099	4	18.2483	0.2493
	4.1231	5.099	18.0278	0.2558
	5.099	5	17.2627	0.2925
	4	4.1231	18.0278	0.2253
	5.099	4.1231	19.2354	0.2397
	4	5	18	0.25
	5.099	5	17.2627	0.2925
	4	5.099	18.0278	0.2524
	5.099	5	17.2627	0.2925
	4.1231	5.099	18.0278	0.2558
	5.099	4.1231	17.2627	0.2671
	4	5.099	18.0278	0.2524
	5.099	4.1231	17.2627	0.2671
	4	5.099	18.0278	0.2524
	5.099	4	17.2627	0.2635
	5.099	5	18.0278	0.2801
	5.099	5.099	18.2483	0.2794
	4.1231	4	18.0278	0.2253
	5.099	5	18.2483	0.2767
	5.099	5	18.0278	0.2801
	5.099	5.099	17.2627	0.2954
	4.1231	5	18.0278	0.253
	5.099	5	18.2483	0.2767
	4	5.099	18.0278	0.2524
	5.099	5	18.2483	0.2767
	5	5.099	18	0.2805
	4.1231	5	18.2483	0.25
	5	5	18.0278	0.2774
	5.099	5.099	19.2354	0.2651
	4	4.1231	18.0278	0.2253
	4.1231	4	18.2483	0.2226
	4	5.099	18.0278	0.2524
	5.099	5	19.2354	0.2625
	4	5.099	18.0278	0.2524
	5.099	5.099	19.2354	0.2651
	4	4.1231	18.0278	0.2253
	5.099	4.1231	18.2483	0.2527
	4.1231	5	18.0278	0.253
	5	5.099	19.2354	0.2625
	4	4	18.0278	0.2219
	5.099	5	19.2354	0.2625
	4.1231	4.1231	18.0278	0.2287
	5.099	4	18.2483	0.2493
	4	4.1231	18.0278	0.2253
	5.099	4.1231	18.2483	0.2527
	4	4.1231	18.0278	0.2253
	5.099	4	18.2483	0.2493
	4.1231	4	18.0278	0.2253
	5.099	5.099	18.2483	0.2794
	4.1231	4.1231	18.0278	0.2287
	5.099	5.099	18.2483	0.2794
	4.1231	5	18.0278	0.253
	5.099	5.099	18.2483	0.2794
	4.1231	5.099	18.0278	0.2558
	5.099	5	18.2483	0.2767
	5.099	5	18.0278	0.2801
	5.099	5.099	18.2483	0.2794
	4	4	18.0278	0.2219
	5.099	5.099	18.2483	0.2794
	4.1231	5	18.0278	0.253
	5.099	5.099	18.2483	0.2794
	4	4.1231	18.0278	0.2253
	5.099	5	18.2483	0.2767
	4	4	18.0278	0.2219
	5.099	5.099	18.2483	0.2794
	4	5.099	18.0278	0.2524
	5.099	5	18.2483	0.2767
	5	5.099	18.0278	0.2801
	5.099	6.0828	18.2483	0.3064
	5	5.099	17.0294	0.2965
	5	4.1231	18.2483	0.25
	4	4.1231	18.0278	0.2253
	5.099	5	18.2483	0.2767
	4	4	17.0294	0.2349
	5.099	5	18.2483	0.2767
	4	4	17.0294	0.2349
	5.099	5.099	17.2627	0.2954
	5	4.1231	18.0278	0.253
	5.099	5.099	18.2483	0.2794
	4	4	17.0294	0.2349
	5.099	4.1231	18.2483	0.2527
	4	4.1231	18.0278	0.2253
	5.099	5	18.2483	0.2767
	5	5	17.0294	0.2936
	6.0828	5.099	18.4391	0.3032
	5	4	18.0278	0.2496
	4.1231	5.099	18.4391	0.2501
	5	5	17.0294	0.2936
	5.099	5.099	18.2483	0.2794
	5	5	18.0278	0.2774
	5.099	5.099	17.2627	0.2954
	5	5	18.0278	0.2774
	5.099	5.099	17.2627	0.2954
	5	4	17	0.2647
	5.099	5	17.2627	0.2925
	5	5	17.0294	0.2936
	5.099	5	17.2627	0.2925
	5	5	17	0.2941
	5.099	5.099	18.2483	0.2794
	5	5	18.0278	0.2774
	5.099	5.099	17.2627	0.2954
	5	5	18.0278	0.2774
	5	5.099	18.2483	0.2767
	5	5	18	0.2778
	5.099	5.099	18.2483	0.2794
	5	5	17.0294	0.2936
	5	4.1231	18.2483	0.25
	5	5.099	18	0.2805
	5	4.1231	18.2483	0.25
	5	5.099	18	0.2805
	5	5.099	18.2483	0.2767
	5	5.099	18.0278	0.2801
	5.099	5.099	18.2483	0.2794
	5	5	18	0.2778
	5.099	5.099	18.2483	0.2794
	5.099	5.099	17.0294	0.2994
	5.099	5.099	18.2483	0.2794
	5	4	17.0294	0.2642
	5.099	5.099	17.2627	0.2954
	4	4	17.0294	0.2349
	4.1231	5.099	17.2627	0.2671
	5	4	18.0278	0.2496
	4.1231	5.099	18.1108	0.2546
	5	4	18.0278	0.2496
	4.1231	5	18.1108	0.2519
	4	5	18.0278	0.2496
	5.099	5	18.2483	0.2767
	4	4	18.0278	0.2219
	5.099	5.099	17.2627	0.2954
	5	5	17	0.2941
	5.099	5.099	18.2483	0.2794
	5	5	17	0.2941
	5.099	5.099	17.2627	0.2954
	4	5	17.0294	0.2642
	5.099	5.099	17.2627	0.2954
	6	5	17.0294	0.323
	5.099	6.0828	18.2483	0.3064
	5	5	17.0294	0.2936
	5.099	5.099	18.2483	0.2794
	5	4	17.0294	0.2642
	5.099	5.099	17.2627	0.2954
	5	4	17.0294	0.2642
	5.099	5.099	18.2483	0.2794
	5	5	18.0278	0.2774
	5.099	5	18.2483	0.2767
	5	5	17.0294	0.2936
	6.0828	5.099	18.2483	0.3064
	5	4	17.0294	0.2642
	5.099	5.099	18.2483	0.2794
	5	4	17.0294	0.2642
	5.099	5.099	17.2627	0.2954
	5	4	17.0294	0.2642
	5.099	4	18.2483	0.2493
	5	4	17.0294	0.2642
	4.1231	5	17.2627	0.2642
	5	5	17.0294	0.2936
	5.099	5	17.2627	0.2925
	5	5	17	0.2941
	4.1231	5	17.2627	0.2642
	5	5	17	0.2941
	5.099	5	18.2483	0.2767
	5	5	18	0.2778
	5.099	5	18.2483	0.2767
	5	4	18.0278	0.2496
	5.099	5	18.2483	0.2767
	5	4	17.0294	0.2642
	5.099	5	18.2483	0.2767
	5	5	17	0.2941
	5.099	5.099	18.2483	0.2794
	5	5	17.0294	0.2936
	5.099	6	18.2483	0.3041
	5	4	17.0294	0.2642
	5.099	5	18.2483	0.2767
	5	5	17.0294	0.2936
	5.099	5	18.1108	0.2788
	5	5	17	0.2941
	6.0828	5	18.1108	0.306
	5	4	17.0294	0.2642
	5.099	5	17.1172	0.295
	5	4	17.0294	0.2642
	5.099	5	17.2627	0.2925
	5	5	17.0294	0.2936
	5.099	5.099	17.2627	0.2954
	5	5	17.0294	0.2936
	4.1231	5.099	17.2627	0.2671
	5	5	17.0294	0.2936
	5.099	5.099	17.2627	0.2954
	5	5	17.0294	0.2936
	5.099	5	18.1108	0.2788
	5	5	17.0294	0.2936
	5.099	5	18.1108	0.2788
	5	5	17.0294	0.2936
	5.099	5	18.2483	0.2767
	5	5	17.0294	0.2936
	5.099	5	18.2483	0.2767
	5	5	17	0.2941
	5.099	5	18.2483	0.2767
	5	5	17.0294	0.2936
	4.1231	5.099	17.2627	0.2671
	5	5	17	0.2941
	5.099	5.099	17.2627	0.2954
	5	4	17	0.2647
	4.1231	5	18.2483	0.25
	5	5	17.1172	0.2921
	5.099	5.099	18.2483	0.2794
	5	5.099	18.1108	0.2788
	4.1231	5.099	17.2627	0.2671
	5	4	17.0294	0.2642
	5.099	5.099	17.1172	0.2979
	5	4	18.0278	0.2496
	4	5.099	17.1172	0.2658
	4	4	18.0278	0.2219
	4	4	18.1108	0.2209
	5	4	18.0278	0.2496
	5	5	18.1108	0.2761
	5	4	18.0278	0.2496
	4	5	18.2483	0.2466
	4	4	18.0278	0.2219
	5.099	4	18.2483	0.2493
	5	5	17.0294	0.2936
	4.1231	5	18.1108	0.2519
	5	5	17	0.2941
	5.099	5	18.2483	0.2767
	4	4	17.0294	0.2349
	5.099	5.099	18.2483	0.2794
	5	5	17	0.2941
	5.099	5	18.2483	0.2767
	4	5	17.0294	0.2642
	5	5.099	18.2483	0.2767
	5	5	17.0294	0.2936
	5.099	5.099	18.2483	0.2794
	4	5	17.0294	0.2642
	5	5.099	18.2483	0.2767
	5	4	17.0294	0.2642
	5.099	5	18.2483	0.2767
	5	5	18.0278	0.2774
	5.099	5	18.1108	0.2788
	5	4	17.0294	0.2642
	5.099	5	18.2483	0.2767
	5	4	17.0294	0.2642
	5	4	18.2483	0.2466
	5	4	17.0294	0.2642
	4.1231	5	18.1108	0.2519
	5	5	18.0278	0.2774
	5	5.099	18.1108	0.2788
	5	5	17.0294	0.2936
	5.099	5	18.1108	0.2788
	5	4	17.0294	0.2642
	4.1231	5.099	17.1172	0.2694
	5	4	17	0.2647
	4.1231	5	17.1172	0.2665
	5	4	17.0294	0.2642
	5.099	5	18.1108	0.2788
	5	5	17.0294	0.2936
	5.099	5	17.1172	0.295
	5	5	17.0294	0.2936
	5.099	5.099	17.2627	0.2954
	5	5.099	18.0278	0.2801
	5.099	5.099	17.2627	0.2954
	5	5	18.0278	0.2774
	5.099	5.099	17.2627	0.2954
	5	5	18.0278	0.2774
	5	5.099	17.1172	0.295
	5	5	17.0294	0.2936
	4	5.099	17.1172	0.2658
	5	5	18	0.2778
	5.099	5.099	17.1172	0.2979
	5	5	18.0278	0.2774
	5.099	5.099	17.1172	0.2979
	5	5.099	18.0278	0.2801
	5	5.099	17.1172	0.295
	4	5	17	0.2647
	4.1231	5.099	17.1172	0.2694
	5.099	5	17.0294	0.2965
	4.1231	5.099	17.1172	0.2694
	5.099	5	17	0.297
	5.099	5.099	17.2627	0.2954
	5	5	17	0.2941
	4.1231	5	17.1172	0.2665
	5	5	17.0294	0.2936
	5.099	5.099	17.1172	0.2979
	5	4	17.0294	0.2642
	4.1231	5	17.1172	0.2665
	5	4	17.0294	0.2642
	5	5.099	18.1108	0.2788
	5	4	18.0278	0.2496
	5	5.099	17.2627	0.2925
	5.099	4	18.0278	0.2524
	5.099	5.099	17.2627	0.2954
	5.099	4.1231	17.0294	0.2708
	4.1231	5.099	17.1172	0.2694
	5	4	18.0278	0.2496
	5.099	5.099	17.1172	0.2979
	5	4	17.0294	0.2642
	5.099	5.099	17.1172	0.2979
	5	4	18.0278	0.2496
	4.1231	5.099	17.2627	0.2671
	5	4	17.0294	0.2642
	5	5.099	18.1108	0.2788
	5	5	18.0278	0.2774
	4.1231	5.099	18.2483	0.2527
	5	4	17	0.2647
	4.1231	5	18.2483	0.25
	5.099	5	17.0294	0.2965
	5.099	5.099	17.2627	0.2954
	5	5.099	17.0294	0.2965
	4.1231	5.099	17.1172	0.2694
	5	5	18.0278	0.2774
	4	5.099	17.1172	0.2658
	5	5	17	0.2941
	4	5.099	17.1172	0.2658
	5	5	17	0.2941
	4.1231	5.099	17.1172	0.2694
	5.099	5	17.1172	0.295
	5.099	5	18.2483	0.2767
	5.099	5	17.0294	0.2965
	5.099	5.099	17.2627	0.2954
	5.099	5	17.1172	0.295
	4	5.099	17.1172	0.2658
	5	5.099	17.1172	0.295
	5.099	5.099	17.1172	0.2979
	4	5	18.0278	0.2496
	5.099	5.099	17.2627	0.2954
	5	5.099	17.0294	0.2965
	5	5.099	17.1172	0.295
	5	5.099	18.0278	0.2801
	5.099	5.099	17.1172	0.2979
	4	4.1231	18.0278	0.2253
	5.099	5.099	17.2627	0.2954
	4	4	17.0294	0.2349
	4.1231	4.1231	17.1172	0.2409
	3	3	18.0278	0.1664
	3.1623	3.1623	18.2483	0.1733
	3	3	17.0294	0.1762
	3.1623	3.1623	18.1108	0.1746
	4	3	17.0294	0.2055
	3.1623	4.1231	17.2627	0.211
	4	4	17.0294	0.2349
	4.1231	3.1623	17.2627	0.211
	4	4	18.0278	0.2219
	4.1231	4.1231	17.2627	0.2388
	5	4	17.0294	0.2642
	5.099	4.1231	17.2627	0.2671
	5	4	17.0294	0.2642
	5.099	4.1231	17.2627	0.2671
	5	4.1231	17	0.2683
	5.099	4.1231	17.1172	0.2694
	5.099	4.1231	17.0294	0.2708
	5.099	5.099	17.2627	0.2954
	5	4	17.0294	0.2642
	5.099	5.099	17.1172	0.2979
	5	4	17.0294	0.2642
	5.099	5.099	17.1172	0.2979
	5	4	17	0.2647
	4.1231	5.099	17.2627	0.2671
	5	4	17	0.2647
	4.1231	5.099	18.1108	0.2546
	5	5	17	0.2941
	4.1231	5.099	17.2627	0.2671
	4.1231	4.1231	17	0.2425
	4.1231	5.099	17.1172	0.2694
	4	5	17.0294	0.2642
	4.1231	5.099	17.2627	0.2671
	4	4	17.0294	0.2349
	4.1231	5.099	17.1172	0.2694
	4	4	17.0294	0.2349
	4.1231	4.1231	17.1172	0.2409
	5	4	17	0.2647
	4.1231	5.099	18.1108	0.2546
	4	3	17.0294	0.2055
	4.1231	5.099	17.2627	0.2671
	4	4	17	0.2353
	4.1231	5	17.2627	0.2642
	5	4	17	0.2647
	4.1231	5.099	17.2627	0.2671
	4	4	17.0294	0.2349
	4.1231	4	18.2483	0.2226
	4	3	18	0.1944
	4	4	18.2483	0.2192
	4.1231	4.1231	18.0278	0.2287
	4	4.1231	18.2483	0.2226
	3	4.1231	18	0.1979
	4	4.1231	18.2483	0.2226
	4	4	17.0294	0.2349
	4.1231	5.099	18.2483	0.2527
	5	4	17.0294	0.2642
	4.1231	5.099	17.2627	0.2671
	5.099	4	18	0.2528
	4.1231	5.099	17.2627	0.2671
	5	4	17.0294	0.2642
	4.1231	5.099	17.2627	0.2671
	5	4	17	0.2647
	4.1231	5.099	17.2627	0.2671
	5	4	17.0294	0.2642
	4.1231	5.099	17.1172	0.2694
	5	4	17.0294	0.2642
	4.1231	5.099	17.1172	0.2694
	4	4	17	0.2353
	4.1231	5	18.2483	0.25
	5	4	17.0294	0.2642
	4.1231	5	17.1172	0.2665
	5	4	17.0294	0.2642
	4.1231	5	17.1172	0.2665
	4	4	17.0294	0.2349
	4.1231	5.099	17.1172	0.2694
	4	4	17.0294	0.2349
	4.1231	5.099	17.2627	0.2671
	5	4	18	0.25
	4.1231	5.099	17.2627	0.2671
	5	4	18.0278	0.2496
	5.099	5.099	17.1172	0.2979
	4	4	18	0.2222
	4.1231	5.099	17.1172	0.2694
	4	4	17.0294	0.2349
	4.1231	5.099	17.1172	0.2694
	4	4	17.0294	0.2349
	5.099	5	18.1108	0.2788
	4	4	17	0.2353
	4.1231	5.099	17.2627	0.2671
	4	4	17	0.2353
	4.1231	5	18.2483	0.25
	4	4	17	0.2353
	4.1231	5	18.1108	0.2519
	4	4	17.0294	0.2349
	4	5	18.1108	0.2485
	4	4	18	0.2222
	4.1231	5.099	17.1172	0.2694
	4	4	17	0.2353
	4.1231	5	18.1108	0.2519
	4	4	18.0278	0.2219
	5.099	4.1231	17.1172	0.2694
	4	4	17.0294	0.2349
	4.1231	5.099	17.1172	0.2694
	4	4	17.0294	0.2349
	5.099	4.1231	17.2627	0.2671
	4	4	17	0.2353
	5	5.099	17.1172	0.295
	4	4	17.0294	0.2349
	5.099	5.099	17.1172	0.2979
	4	4	17.0294	0.2349
	5.099	4	17.2627	0.2635
	4	5	17.0294	0.2642
	5.099	5.099	17.2627	0.2954
	4	5	17.0294	0.2642
	5.099	4.1231	17.2627	0.2671
	4	4	17.0294	0.2349
	5.099	5	18.1108	0.2788
	4	4	17.0294	0.2349
	5	5.099	18.1108	0.2788
	4	4	18	0.2222
	4.1231	5	18.1108	0.2519
	4	4	18.0278	0.2219
	5.099	4	18.1108	0.2512
	4	4	18.0278	0.2219
	4.1231	5.099	18.1108	0.2546
	4	4.1231	18.0278	0.2253
	5.099	5	18.1108	0.2788
	4	4	17	0.2353
	5.099	4.1231	17.1172	0.2694
	4	4.1231	18	0.2256
	5.099	5	18.1108	0.2788
	4	4.1231	18.0278	0.2253
	5.099	4.1231	18.2483	0.2527
	4	4	18.0278	0.2219
	5	4.1231	17.2627	0.2642
	4.1231	4.1231	18.0278	0.2287
	4	4	18.1108	0.2209
	4.1231	4.1231	18.0278	0.2287
	4.1231	4.1231	17.1172	0.2409
	4	4	17.0294	0.2349
	5.099	4.1231	18.2483	0.2527
	4.1231	4.1231	17.0294	0.2421
	5	4.1231	18.1108	0.2519
	4	5.099	18	0.2528
	5.099	4.1231	17.2627	0.2671
	4	4.1231	18.0278	0.2253
	5	4.1231	18.2483	0.25
	4	3	17	0.2059
	4	4.1231	18.2483	0.2226
	4	4.1231	17.0294	0.2385
	4	4	18.2483	0.2192
	4.1231	4.1231	17.0294	0.2421
	5	4	18.2483	0.2466
	4	5	17.0294	0.2642
	5	4.1231	18.2483	0.25
	4	3	17	0.2059
	4	4.1231	18.2483	0.2226
	4	5	18.0278	0.2496
	4	4	18.2483	0.2192
	4	5	17.0294	0.2642
	5	4.1231	18.2483	0.25
	4	4.1231	18.0278	0.2253
	5	4	18.1108	0.2485
	4	4	18.0278	0.2219
	5.099	4	18.2483	0.2493
	4	4	18.0278	0.2219
	5.099	4	18.2483	0.2493
	4	4	18.0278	0.2219
	4.1231	5.099	18.1108	0.2546
	4	5	18	0.25
	5.099	4	18.2483	0.2493
	4	4	18.0278	0.2219
	5.099	4.1231	17.1172	0.2694
	4	5	18	0.25
	5.099	4.1231	18.2483	0.2527
	4	5	17	0.2647
	5.099	5.099	18.2483	0.2794
	4	4	17.0294	0.2349
	5.099	5.099	17.1172	0.2979
	4	4	18.0278	0.2219
	5.099	5	18.2483	0.2767
	4	5	18.0278	0.2496
	5.099	4	18.2483	0.2493
	4	5	18.0278	0.2496
	5.099	4	18.2483	0.2493
	4	4	18.0278	0.2219
	5.099	5	18.1108	0.2788
	4	4	17.0294	0.2349
	5.099	5.099	17.1172	0.2979
	4	4	18.0278	0.2219
	5.099	5	18.1108	0.2788
	4	4	18.0278	0.2219
	5.099	5	18.1108	0.2788
	4	4	18.0278	0.2219
	5.099	5	18.1108	0.2788
	4	4	18	0.2222
	5	4	18.1108	0.2485
	4	4.1231	18	0.2256
	4	5	18.1108	0.2485
	4	4	18.0278	0.2219
	5	4.1231	18.1108	0.2519
	4	4	18.0278	0.2219
	4.1231	5	18.1108	0.2519
	4	5	18.0278	0.2496
	5.099	5	18.2483	0.2767
	4	4	18.0278	0.2219
	5.099	5	18.1108	0.2788
	4	4	18.0278	0.2219
	5.099	5	18.2483	0.2767
	4	4	18.0278	0.2219
	5.099	4.1231	17.2627	0.2671
	4	4	17.0294	0.2349
	5.099	5	17.2627	0.2925
	4	4	18.0278	0.2219
	5.099	5.099	17.1172	0.2979
	4	4	18.0278	0.2219
	5.099	5	18.1108	0.2788
	4	4	17.0294	0.2349
	5.099	4	18.2483	0.2493
	4	4	18	0.2222
	4	4	18.2483	0.2192
	5	5	18	0.2778
	5	5	18.2483	0.274
	5	4	18	0.25
	5	4	18.2483	0.2466
	5	4	18	0.25
	5	5.099	18.2483	0.2767
	5	5	18	0.2778
	5	4.1231	18.2483	0.25
	5	5	18	0.2778
	5.099	5.099	18.2483	0.2794
	5	5	18	0.2778
	5.099	5.099	18.2483	0.2794
	5	5	18.0278	0.2774
	5	5.099	18.2483	0.2767
	5	5	17	0.2941
	4.1231	5	18.2483	0.25
	5	5	18.0278	0.2774
	4	5.099	18.2483	0.2493
	5	4.1231	18.0278	0.253
	4	5.099	18.2483	0.2493
	5	4	18	0.25
	4.1231	5	18.2483	0.25
	5	4.1231	18	0.2534
	4.1231	5	18.2483	0.25
	5	4	18	0.25
	4.1231	5	18.2483	0.25
	5	5	18.0278	0.2774
	5.099	5	18.2483	0.2767
	5	5	18	0.2778
	5.099	4.1231	18.2483	0.2527
	5	5.099	18.0278	0.2801
	5.099	4.1231	18.2483	0.2527
	4	4.1231	18.0278	0.2253
	4	5.099	18.2483	0.2493
	5	4	18	0.25
	4	5.099	18.2483	0.2493
	5	4	18	0.25
	5.099	5.099	18.2483	0.2794
	5	4	18.0278	0.2496
	5.099	5.099	18.2483	0.2794
	5	4	18.0278	0.2496
	4	5.099	18.2483	0.2493
	5.099	4	18.0278	0.2524
	4.1231	5.099	18.2483	0.2527
	5	4	18.0278	0.2496
	4	5.099	17.2627	0.2635
	5	4.1231	18.0278	0.253
	4	5.099	18.2483	0.2493
	5	4.1231	18	0.2534
	4.1231	5.099	18.2483	0.2527
	4	4	18.0278	0.2219
	5	5.099	18.1108	0.2788
	4	5	18	0.25
	5	4.1231	18.2483	0.25
	4	5	18	0.25
	5	4.1231	18.2483	0.25
	4	4	18.0278	0.2219
	5.099	5	18.2483	0.2767
	4	4	18.0278	0.2219
	5.099	4.1231	18.2483	0.2527
	4	4	18.0278	0.2219
	5.099	4.1231	18.2483	0.2527
	4	4	18.0278	0.2219
	5.099	5	18.2483	0.2767
	4	4	18.0278	0.2219
	5.099	4	18.2483	0.2493
	4	4	18.0278	0.2219
	4.1231	4.1231	17.2627	0.2388
	4	4	17.0294	0.2349
	4.1231	5	18.2483	0.25
	5	4	18.0278	0.2496
	5.099	4	18.1108	0.2512
	4	4	18	0.2222
	4.1231	5	18.1108	0.2519
	4	4	17.0294	0.2349
	4.1231	4.1231	17.2627	0.2388
	4	4	17.0294	0.2349
	5.099	4.1231	17.2627	0.2671
	4	4	17.0294	0.2349
	5.099	4.1231	17.2627	0.2671
	4	4	17.0294	0.2349
	4.1231	4.1231	17.1172	0.2409
	4	4	17.0294	0.2349
	5.099	5.099	17.1172	0.2979
	4	4	18.0278	0.2219
	5.099	4	18.2483	0.2493
	4	4	17.0294	0.2349
	5.099	4.1231	17.2627	0.2671
	4	4	17	0.2353
	5.099	4.1231	18.2483	0.2527
	4	5	18	0.25
	5.099	4.1231	17.2627	0.2671
	4	4	17	0.2353
	5.099	4.1231	17.2627	0.2671
	4	4	17.0294	0.2349
	5.099	4.1231	17.2627	0.2671
	4	5	17	0.2647
	5.099	4.1231	17.2627	0.2671
	4	4	17.0294	0.2349
	5.099	5.099	17.2627	0.2954
	4	4	17.0294	0.2349
	5.099	5.099	17.2627	0.2954
	4	4	17.0294	0.2349
	4.1231	5	18.2483	0.25
	4	4	17.0294	0.2349
	5.099	5.099	17.1172	0.2979
	4	5	17.0294	0.2642
	5.099	4.1231	18.2483	0.2527
	4	4	17.0294	0.2349
	5.099	5.099	18.2483	0.2794
	4	4	17.0294	0.2349
	5.099	4.1231	17.2627	0.2671
	5	4	18.0278	0.2496
	5.099	5.099	18.1108	0.2815
	5	5.099	18.0278	0.2801
	5.099	5.099	18.2483	0.2794
	4	4	17.0294	0.2349
	4	5.099	17.2627	0.2635
	3	2	18	0.1389
	3	3	18.2483	0.1644
	2	3	17	0.1471
	2.2361	2	17.1172	0.1237
	3	2	18	0.1389
	2.2361	3	18.2483	0.1435
	3.1623	3	18	0.1712
	3.1623	3.1623	18.1108	0.1746
	4	3	18	0.1944
	4.1231	4	18.1108	0.2243
	4	4	17	0.2353
	3	4	18.1108	0.1933
	4	4	18.0278	0.2219
	4.1231	5	18.2483	0.25
	5	4	17	0.2647
	4.1231	5	18.2483	0.25
	5	4	18.0278	0.2496
	4	5.099	18.2483	0.2493
	5	4	18	0.25
	5.099	5	18.2483	0.2767
	5	4	18	0.25
	4.1231	5	18.2483	0.25
	5	4	18	0.25
	4	5.099	18.2483	0.2493
	5	4	17.0294	0.2642
	4.1231	5.099	18.2483	0.2527
	5	5	18	0.2778
	5	4.1231	18.2483	0.25
	5	5	17	0.2941
	5	4.1231	17.2627	0.2642
	5	4	18.0278	0.2496
	5.099	5	18.2483	0.2767
	5	5	17	0.2941
	5.099	4.1231	18.2483	0.2527
	5	5	17	0.2941
	5	5.099	18.2483	0.2767
	5	5	17.0294	0.2936
	5.099	5.099	18.2483	0.2794
	5	5	17	0.2941
	5.099	5	18.2483	0.2767
	5	5	17	0.2941
	5.099	5	18.2483	0.2767
	5	4	17.0294	0.2642
	5.099	5	18.2483	0.2767
	5	5	17	0.2941
	4.1231	5	18.2483	0.25
	5	5	17.0294	0.2936
	5.099	5.099	18.2483	0.2794
	5	5	17	0.2941
	5.099	5	18.2483	0.2767
	5	5	17.0294	0.2936
	5.099	4	18.2483	0.2493
	5	5	17	0.2941
	5.099	5	18.2483	0.2767
	5	5	17.0294	0.2936
	5.099	5	18.2483	0.2767
	5	5	17	0.2941
	5	5.099	18.2483	0.2767
	5	5	17.0294	0.2936
	5.099	5	18.2483	0.2767
	5	5	17	0.2941
	5.099	4	18.2483	0.2493
	5	5	17	0.2941
	5	4	18.2483	0.2466
	5	5	17.0294	0.2936
	5	5.099	18.2483	0.2767
	5	5	17	0.2941
	5	5.099	18.2483	0.2767
	5	5	17.0294	0.2936
	5.099	5.099	17.2627	0.2954
	5	5	17.0294	0.2936
	5	5.099	18.2483	0.2767
	5	5	17.0294	0.2936
	5	5.099	17.2627	0.2925
	5	4	17.0294	0.2642
	5.099	5.099	17.2627	0.2954
	5	4.1231	18.0278	0.253
	5.099	5.099	17.2627	0.2954
	5	4	17.0294	0.2642
	4.1231	5.099	17.2627	0.2671
	5	4	18.0278	0.2496
	5.099	4	17.2627	0.2635
	4	4.1231	18.0278	0.2253
	4.1231	5	17.2627	0.2642
	5	4	18	0.25
	4.1231	5	17.2627	0.2642
	5	4	17.0294	0.2642
	4.1231	5	17.2627	0.2642
	5	4	17.0294	0.2642
	4.1231	5.099	17.2627	0.2671
	5	4	17.0294	0.2642
	4.1231	5.099	17.2627	0.2671
	5	5	17.0294	0.2936
	5.099	5.099	17.2627	0.2954
	5	5	17.0294	0.2936
	5.099	5.099	17.2627	0.2954
	5	5	17.0294	0.2936
	5.099	5.099	17.2627	0.2954
	5	5	17.0294	0.2936
	5.099	5.099	17.2627	0.2954
	5	5	18.0278	0.2774
	5.099	5.099	17.2627	0.2954
	5	5.099	18.0278	0.2801
	5.099	5.099	17.2627	0.2954
	5	5.099	18.0278	0.2801
	5.099	5.099	17.2627	0.2954
	5	5	17.0294	0.2936
	5.099	5.099	17.2627	0.2954
	5	5.099	18	0.2805
	5.099	6.0828	17.2627	0.3239
	5	5	17.0294	0.2936
	5	6.0828	17.2627	0.321
	5	5	17	0.2941
	5.099	5.099	17.2627	0.2954
	5	5	17.0294	0.2936
	5.099	6.0828	17.2627	0.3239
	5	5	17	0.2941
	5	6.0828	18.2483	0.3037
	5	5	17.0294	0.2936
	5	6.0828	18.2483	0.3037
	5	5	17.0294	0.2936
	5	5.099	17.2627	0.2925
	5	5	17	0.2941
	5	5.099	18.2483	0.2767
	5	5	17.0294	0.2936
	5	5.099	18.2483	0.2767
	5	5	17	0.2941
	5	5.099	18.2483	0.2767
	5	5	17	0.2941
	5	5.099	17.2627	0.2925
	5	5	17.0294	0.2936
	5	6.0828	18.2483	0.3037
	5	5	17	0.2941
	5	5.099	18.2483	0.2767
	5	5	17	0.2941
	5	5.099	18.2483	0.2767
	5	5	17.0294	0.2936
	5.099	5.099	18.2483	0.2794
	5	5.099	18	0.2805
	5	6.0828	18.2483	0.3037
	5	5	17	0.2941
	5.099	5.099	18.2483	0.2794
	5	5	17.0294	0.2936
	5.099	5.099	18.2483	0.2794
	5	5.099	18.0278	0.2801
	5.099	5.099	18.2483	0.2794
	5	5	17.0294	0.2936
	5.099	5.099	18.2483	0.2794
	5	5	17.0294	0.2936
	5	6.0828	18.2483	0.3037
	5	5	17	0.2941
	5.099	5.099	18.2483	0.2794
	5	5	17	0.2941
	4	5.099	18.2483	0.2493
	4	4	17.0294	0.2349
	5.099	5.099	18.2483	0.2794
	4	4	17.0294	0.2349
	5	4.1231	17.1172	0.2665
	4	5	18.0278	0.2496
	5	4	18.1108	0.2485
	4	5	17.0294	0.2642
	5.099	4	18.1108	0.2512
	4	4	17.0294	0.2349
	4	4	18.1108	0.2209
	4	3	17.0294	0.2055
	4	4	18.1108	0.2209
	4	4	18.0278	0.2219
	4	4	18.1108	0.2209
	4	3	18.0278	0.1941
	4.1231	4.1231	18.1108	0.2277
	5	5	18.0278	0.2774
	4.1231	5	18.2483	0.25
	5	4	18.0278	0.2496
	4.1231	5.099	18.2483	0.2527
	4	4	17	0.2353
	4.1231	5	18.2483	0.25
	5	4	17	0.2647
	5.099	5	18.2483	0.2767
	5	4	17	0.2647
	5.099	5	18.2483	0.2767
	5	4	17.0294	0.2642
	4.1231	5	18.2483	0.25
	5	4	18	0.25
	4.1231	5	18.2483	0.25
	5	4	18.0278	0.2496
	4.1231	5	18.2483	0.25
	4	4	18.0278	0.2219
	5.099	4	18.1108	0.2512
	5	4	17.0294	0.2642
	5	5.099	18.2483	0.2767
	5	4	17	0.2647
	5	5.099	17.1172	0.295
	5	4	17.0294	0.2642
	5.099	5	18.1108	0.2788
	5	4	18.0278	0.2496
	5.099	5	18.1108	0.2788
	5	5	17	0.2941
	5	5	18.1108	0.2761
	5	4	18	0.25
	5	5.099	18.1108	0.2788
	5	4	17.0294	0.2642
	5.099	5.099	18.2483	0.2794
	4	4	17.0294	0.2349
	5	5.099	18.2483	0.2767
	5	4	17.0294	0.2642
	4.1231	5	18.2483	0.25
	5	4	17.0294	0.2642
	5	5.099	18.1108	0.2788
	5	4	17	0.2647
	4.1231	5.099	18.2483	0.2527
	5	4	17.0294	0.2642
	4	5.099	18.2483	0.2493
	5	4	17.0294	0.2642
	4	5.099	17.2627	0.2635
	5	4	17.0294	0.2642
	4	5.099	17.2627	0.2635
	5	5	17.0294	0.2936
	4	5.099	18.2483	0.2493
	5	5	17	0.2941
	4	5.099	18.2483	0.2493
	5	4	17.0294	0.2642
	4	5.099	17.2627	0.2635
	5	4	17.0294	0.2642
	5.099	5.099	17.1172	0.2979
	5	5	17	0.2941
	4	5.099	18.2483	0.2493
	5	4	17.0294	0.2642
	4.1231	5.099	17.2627	0.2671
	5	4	17.0294	0.2642
	5	5.099	18.2483	0.2767
	5	5	17.0294	0.2936
	5	5.099	18.2483	0.2767
	5	5	17	0.2941
	5.099	5.099	17.2627	0.2954
	5	4	17	0.2647
	4.1231	5.099	17.2627	0.2671
	5	4	17.0294	0.2642
	5	5.099	17.2627	0.2925
	5	4	17.0294	0.2642
	4	5.099	17.2627	0.2635
	5	5	17.0294	0.2936
	6.0828	5.099	18.2483	0.3064
	5	5	17.0294	0.2936
	5	5.099	18.2483	0.2767
	5	4	17.0294	0.2642
	5	5.099	18.2483	0.2767
	5	4	17	0.2647
	4.1231	5	18.2483	0.25
	5	4	17.0294	0.2642
	5	5.099	18.2483	0.2767
	5	5	17	0.2941
	5.099	5.099	18.2483	0.2794
	5	5	17.0294	0.2936
	5	5.099	17.2627	0.2925
	5	4	17.0294	0.2642
	4.1231	5.099	17.2627	0.2671
	5	4	18.0278	0.2496
	4	5.099	17.2627	0.2635
	5	4	18	0.25
	4	5.099	18.2483	0.2493
	5	4	18.0278	0.2496
	5	5.099	17.2627	0.2925
	5	4	18.0278	0.2496
	6	5.099	17.2627	0.3215
	5	4	18.0278	0.2496
	5	5.099	17.2627	0.2925
	5	4	18	0.25
	5	5.099	17.2627	0.2925
	5	4	18.0278	0.2496
	5.099	5.099	17.1172	0.2979
	4	4.1231	18.0278	0.2253
	5.099	5.099	17.2627	0.2954
	5	4	18.0278	0.2496
	4.1231	5.099	17.2627	0.2671
	5	4	17	0.2647
	4.1231	5.099	17.2627	0.2671
	5	4	18.0278	0.2496
	4.1231	5.099	17.2627	0.2671
	5	4	18.0278	0.2496
	5.099	5.099	17.1172	0.2979
	5	4	18.0278	0.2496
	5.099	5.099	17.1172	0.2979
	5	4	17	0.2647
	4	5.099	17.2627	0.2635
	5	4	17.0294	0.2642
	5	5.099	18.2483	0.2767
	5	4	18.0278	0.2496
	5	5.099	17.1172	0.295
	5	4	18.0278	0.2496
	5	5.099	17.2627	0.2925
	5	4	17.0294	0.2642
	5	5.099	17.2627	0.2925
	5	4	17.0294	0.2642
	5	5.099	17.1172	0.295
	5	4	18.0278	0.2496
	4.1231	5.099	18.2483	0.2527
	5	4	18	0.25
	5.099	5	18.2483	0.2767
	5	4	18	0.25
	5.099	5	18.2483	0.2767
	5	4	17.0294	0.2642
	5	5.099	18.2483	0.2767
	5	4	17	0.2647
	5.099	5.099	18.2483	0.2794
	5	4	18	0.25
	4	5.099	18.2483	0.2493
	5	4	17	0.2647
	4	5.099	18.2483	0.2493
	5	4	18.0278	0.2496
	4.1231	5	18.2483	0.25
	5	4	17	0.2647
	4.1231	5	18.2483	0.25
	5	4	17	0.2647
	4.1231	5	18.2483	0.25
	5	4	17	0.2647
	4.1231	5	18.2483	0.25
	5	4	17.0294	0.2642
	5.099	5	18.2483	0.2767
	5	4	17	0.2647
	5.099	5.099	17.2627	0.2954
	5	4	17.0294	0.2642
	4.1231	5	18.2483	0.25
	5	5	17	0.2941
	5.099	5.099	18.2483	0.2794
	5	5	17	0.2941
	5.099	5.099	18.2483	0.2794
	5	4	17.0294	0.2642
	5.099	5.099	17.2627	0.2954
	5	4	17	0.2647
	4.1231	5.099	17.2627	0.2671
	5	5	17	0.2941
	5.099	5.099	18.2483	0.2794
	5	5	17	0.2941
	5.099	5.099	18.2483	0.2794
	5	5	17.0294	0.2936
	5.099	5.099	18.2483	0.2794
	5	5	17	0.2941
	5.099	5.099	18.2483	0.2794
	5	5	17	0.2941
	5.099	5.099	17.2627	0.2954
	5	5	17	0.2941
	5.099	5.099	17.2627	0.2954
	5	5	17	0.2941
	5.099	5	18.2483	0.2767
	5	5	17	0.2941
	5.099	5.099	19.2354	0.2651
	5	5	17.0294	0.2936
	5.099	5.099	18.2483	0.2794
	5	5	17	0.2941
	5.099	5.099	18.2483	0.2794
	5	5	17.0294	0.2936
	5.099	5.099	18.2483	0.2794
	5.099	5	18	0.2805
	5	5.099	18.2483	0.2767
	5	5	17	0.2941
	5	5.099	17.2627	0.2925
	5	5	17	0.2941
	5.099	5.099	18.2483	0.2794
	5	5	17.0294	0.2936
	5.099	5.099	17.2627	0.2954
	5	5	17	0.2941
	5.099	5	18.2483	0.2767
	5	5	17	0.2941
	5	5.099	19.2354	0.2625
	5	5	17	0.2941
	5.099	5.099	17.2627	0.2954
	5	5	17	0.2941
	5.099	5	18.2483	0.2767
	5	5	17	0.2941
	5.099	5	18.2483	0.2767
	5	5	17	0.2941
	5.099	5	18.2483	0.2767
	5	5	17.0294	0.2936
	5.099	5	18.2483	0.2767
	5	5	17	0.2941
	5.099	5	18.2483	0.2767
	5	5	17	0.2941
	5.099	6.0828	18.2483	0.3064
	5	5	17.0294	0.2936
	5.099	5	18.2483	0.2767
	5	5	17	0.2941
	5.099	5.099	18.2483	0.2794
	5	5	17	0.2941
	5.099	5	18.2483	0.2767
	5	5	17.0294	0.2936
	5.099	5.099	18.2483	0.2794
	5	5	17.0294	0.2936
	5.099	5	18.2483	0.2767
	5	5	17	0.2941
	5.099	5.099	18.2483	0.2794
	5	5	17	0.2941
	5	5.099	18.2483	0.2767
	5	5	18	0.2778
	5.099	5	18.2483	0.2767
	5	4	18	0.25
	4.1231	5.099	17.2627	0.2671
	5	4	17	0.2647
	4	5.099	17.2627	0.2635
	5	4	17	0.2647
	4	5.099	18.2483	0.2493
	5	4	17	0.2647
	4	5.099	18.2483	0.2493
	5	4	17	0.2647
	4	5	18.2483	0.2466
	5	4	17.0294	0.2642
	4	5.099	18.2483	0.2493
	5	5	17.0294	0.2936
	5	5.099	18.1108	0.2788
	5	5	17.0294	0.2936
	5.099	5.099	18.2483	0.2794
	5	5	17	0.2941
	5.099	5	18.2483	0.2767
	5	4	17.0294	0.2642
	4.1231	5	18.1108	0.2519
	5	5	17	0.2941
	5.099	5	18.2483	0.2767
	5	5	17.0294	0.2936
	5.099	5	18.2483	0.2767
	5	5	17	0.2941
	5.099	5.099	18.2483	0.2794
	5	5	17	0.2941
	5	5.099	18.2483	0.2767
	5	5	17	0.2941
	5.099	5.099	17.1172	0.2979
	5	5.099	18.0278	0.2801
	5.099	5.099	17.2627	0.2954
	5	5	17	0.2941
	5	5.099	18.2483	0.2767
	5	5.099	18.0278	0.2801
	5.099	5.099	18.2483	0.2794
	5	5	17	0.2941
	5.099	5.099	18.2483	0.2794
	5	5	17.0294	0.2936
	5	5.099	18.2483	0.2767
	5	5	17	0.2941
	4.1231	5.099	17.2627	0.2671
	5	5	17	0.2941
	5.099	5.099	18.2483	0.2794
	5	5	17	0.2941
	4	5.099	18.2483	0.2493
	5	4	17.0294	0.2642
	4.1231	5.099	17.2627	0.2671
	5	4	17	0.2647
	4.1231	5.099	18.2483	0.2527
	5	5.099	18	0.2805
	4	5.099	18.2483	0.2493
	5	5	17.0294	0.2936
	5.099	5.099	17.2627	0.2954
	5	5	17.0294	0.2936
	5	5.099	18.2483	0.2767
	5	5	18	0.2778
	5	5.099	18.2483	0.2767
	5	5.099	18.0278	0.2801
	5	5.099	18.2483	0.2767
	5	5.099	18.0278	0.2801
	5.099	5.099	17.2627	0.2954
	5	5.099	18	0.2805
	4	5.099	18.2483	0.2493
	5	5	18.0278	0.2774
	4.1231	5.099	18.2483	0.2527
	5	5	17.0294	0.2936
	5	5.099	18.2483	0.2767
	5	5	17	0.2941
	5.099	5	18.2483	0.2767
	5	5	17	0.2941
	4.1231	5.099	18.2483	0.2527
	5	4	17	0.2647
	4	5.099	18.2483	0.2493
	5	5	17.0294	0.2936
	5	5.099	18.2483	0.2767
	5	5	17.0294	0.2936
	5.099	5.099	18.2483	0.2794
	5	4	17.0294	0.2642
	5	5.099	18.2483	0.2767
	5	5	17	0.2941
	5.099	5.099	18.2483	0.2794
	5	5	17	0.2941
	5	5.099	18.2483	0.2767
	5	5	17.0294	0.2936
	4	5.099	18.2483	0.2493
	5	5	17.0294	0.2936
	4.1231	5	18.2483	0.25
	5	5	17.0294	0.2936
	5.099	5.099	18.2483	0.2794
	5	5	17.0294	0.2936
	5.099	5	18.1108	0.2788
	5	5	17	0.2941
	5.099	5	18.1108	0.2788
	5.099	5	17	0.297
	5.099	5.099	17.2627	0.2954
	5	5	17	0.2941
	5.099	5	18.2483	0.2767
	5.099	5	17.0294	0.2965
	5.099	5.099	17.2627	0.2954
	5	5	18	0.2778
	6	5.099	18.2483	0.3041
	5.099	5	17.0294	0.2965
	5.099	5.099	18.2483	0.2794
	5.099	5	18.0278	0.2801
	5.099	5.099	18.2483	0.2794
	6.0828	5	18.0278	0.3074
	5.099	6.0828	17.2627	0.3239
	5	5	18.0278	0.2774
	5	6.0828	18.2483	0.3037
	5	5.099	18.0278	0.2801
	5.099	5.099	17.2627	0.2954
	5.099	5	18.0278	0.2801
	5.099	5.099	17.2627	0.2954
	5.099	5	18	0.2805
	5.099	6.0828	18.2483	0.3064
	5.099	5.099	18.0278	0.2828
	5.099	5.099	17.2627	0.2954
	5.099	5	18.0278	0.2801
	5.099	5.099	18.2483	0.2794
	5.099	5	18.1108	0.2788
	5.099	6.0828	17.2627	0.3239
	5	5	17	0.2941
	5.099	6.0828	17.2627	0.3239
	5.099	5	17.0294	0.2965
	5	6.0828	17.2627	0.321
	5.099	5.099	18.0278	0.2828
	5	5.099	18.2483	0.2767
	5	5.099	18	0.2805
	5.099	6.0828	18.2483	0.3064
	5	5	18.0278	0.2774
	5.099	5.099	17.2627	0.2954
	5.099	5	18	0.2805
	5.099	6.0828	17.2627	0.3239
	5	5.099	18	0.2805
	5.099	6.0828	17.2627	0.3239
	5	5	18.0278	0.2774
	5.099	6.0828	18.2483	0.3064
	5	5.099	18.1108	0.2788
	5.099	5.099	18.2483	0.2794
	5	5.099	18.0278	0.2801
	5.099	5.099	18.2483	0.2794
	5	5	18	0.2778
	5.099	6.0828	18.2483	0.3064
	5	5	18.0278	0.2774
	5	5.099	17.2627	0.2925
	5	5	18	0.2778
	5	6.0828	17.2627	0.321
	5	5	18.0278	0.2774
	5	6.0828	18.2483	0.3037
	6	5	18	0.3056
	5	6.0828	18.2483	0.3037
	5	5.099	18.1108	0.2788
	5	5.099	17.2627	0.2925
	5.099	5	18.0278	0.2801
	5	5.099	17.2627	0.2925
	5.099	5	18.0278	0.2801
	5	6.0828	17.2627	0.321
	5	5.099	18	0.2805
	5.099	6.0828	17.2627	0.3239
	5.099	5	17.0294	0.2965
	5	5.099	17.2627	0.2925
	5.099	5	18.0278	0.2801
	5	5.099	18.2483	0.2767
	5.099	5	17	0.297
	5.099	5.099	17.2627	0.2954
	5.099	5	17	0.297
	5.099	6	18.2483	0.3041
	5.099	5	18	0.2805
	5.099	6.0828	17.2627	0.3239
	4	4	18.0278	0.2219
	4	4.1231	18.2483	0.2226
	3.1623	3.1623	18	0.1757
	4.1231	3.1623	19.2354	0.1894
	3	3	19	0.1579
	3	3.1623	18.2483	0.1688
	4	3	18	0.1944
	3	3	17.2627	0.1738
	4	4	18.0278	0.2219
	4	5.099	18.2483	0.2493
	5	4	18	0.25
	5.099	5.099	17.2627	0.2954
	5	5	17.0294	0.2936
	5.099	5.099	17.2627	0.2954
	5	5	17.0294	0.2936
	4.1231	5.099	17.2627	0.2671
	5	5	18	0.2778
	5.099	5.099	17.2627	0.2954
	5	5.099	18	0.2805
	5	5.099	17.2627	0.2925
	5	5	17	0.2941
	5	5.099	17.2627	0.2925
	5	5.099	18.0278	0.2801
	5.099	5.099	18.2483	0.2794
	5	5.099	18	0.2805
	5	5.099	17.2627	0.2925
	5	5.099	18.0278	0.2801
	5.099	5.099	18.2483	0.2794
	5	5.099	18	0.2805
	5.099	5.099	17.2627	0.2954
	5	5.099	18.0278	0.2801
	5	5.099	18.2483	0.2767
	6	5	18	0.3056
	5.099	6.0828	18.2483	0.3064
	5	5.099	18.0278	0.2801
	6	5.099	17.2627	0.3215
	5	5.099	18.0278	0.2801
	5.099	5.099	17.2627	0.2954
	5.099	5	18.1108	0.2788
	5	6.0828	18.2483	0.3037
	5.099	5	17	0.297
	5.099	5	18.2483	0.2767
	5.099	5.099	17.0294	0.2994
	5.099	5	18.2483	0.2767
	5.099	5	17.0294	0.2965
	5.099	5	18.2483	0.2767
	5.099	5	17	0.297
	5.099	6.0828	18.2483	0.3064
	5.099	5	18	0.2805
	5.099	6.0828	18.2483	0.3064
	5.099	5	17	0.297
	5.099	5.099	18.2483	0.2794
	5	5	17.0294	0.2936
	6.0828	5	18.2483	0.3037
	5	5	17	0.2941
	6.0828	5	18.2483	0.3037
	5	5	17	0.2941
	5.099	5	18.2483	0.2767
	5	5	17	0.2941
	6.0828	5.099	18.2483	0.3064
	5	4	17	0.2647
	5.099	5	18.2483	0.2767
	5	5	17.0294	0.2936
	6.0828	5.099	18.1108	0.3087
	5	5	17.0294	0.2936
	6.0828	5.099	18.2483	0.3064
	5	5	17	0.2941
	5.099	5	18.2483	0.2767
	5	5	17.0294	0.2936
	5.099	5.099	18.2483	0.2794
	5	4	17.0294	0.2642
	5.099	5	18.2483	0.2767
	5	5	17	0.2941
	5	5.099	18.2483	0.2767
	5	5	17.0294	0.2936
	5.099	5	18.2483	0.2767
	5	5	17.0294	0.2936
	6.0828	5.099	18.2483	0.3064
	5	5	17	0.2941
	5.099	6.0828	18.2483	0.3064
	5	5	17.0294	0.2936
	5	5.099	18.2483	0.2767
	5	5	17.0294	0.2936
	6.0828	5.099	18.2483	0.3064
	5	5	17.0294	0.2936
	4.1231	5.099	17.1172	0.2694
	5	5.099	17.0294	0.2965
	6.0828	5.099	18.2483	0.3064
	5	5	17.0294	0.2936
	5.099	5.099	18.2483	0.2794
	5	5	17.0294	0.2936
	5.099	5.099	17.1172	0.2979
	5	4.1231	18.0278	0.253
	4.1231	5.099	18.2483	0.2527
	5	4.1231	18.0278	0.253
	4.1231	5.099	18.2483	0.2527
	5	4.1231	18.0278	0.253
	4.1231	5.099	17.2627	0.2671
	5	4	18.0278	0.2496
	4.1231	5.099	17.2627	0.2671
	5	4	17	0.2647
	4.1231	5.099	17.2627	0.2671
	5	4.1231	18.0278	0.253
	4.1231	5.099	17.2627	0.2671
	5	4.1231	17.0294	0.2679
	5	5.099	18.2483	0.2767
	5	4	17.0294	0.2642
	5.099	5.099	18.2483	0.2794
	5	5.099	18.0278	0.2801
	5.099	5.099	17.2627	0.2954
	5	5.099	18.0278	0.2801
	4.1231	5.099	18.2483	0.2527
	5	4	17.0294	0.2642
	5.099	5	17.1172	0.295
	5	4	18.0278	0.2496
	4.1231	5.099	18.2483	0.2527
	5	4.1231	18.0278	0.253
	5.099	5.099	18.2483	0.2794
	5.099	5	18.0278	0.2801
	5.099	5.099	17.2627	0.2954
	5	4	18	0.25
	4.1231	5.099	17.2627	0.2671
	5	4	17.0294	0.2642
	5.099	5.099	17.2627	0.2954
	5	4	17.0294	0.2642
	4.1231	5.099	17.2627	0.2671
	5	4	17.0294	0.2642
	4.1231	5	17.2627	0.2642
	5.099	5	18.0278	0.2801
	5.099	5.099	18.2483	0.2794
	5	5	17.0294	0.2936
	6.0828	5	18.2483	0.3037
	5	5	18.0278	0.2774
	5.099	5	18.2483	0.2767
	5.099	5	18.0278	0.2801
	5.099	5.099	17.2627	0.2954
	5	5.099	17.0294	0.2965
	5.099	5.099	17.2627	0.2954
	5	5.099	17.0294	0.2965
	5.099	5.099	17.2627	0.2954
	5	5.099	17.0294	0.2965
	5.099	5.099	17.2627	0.2954
	5	5	17.0294	0.2936
	6.0828	5.099	17.2627	0.3239
	5	5.099	18.0278	0.2801
	5.099	5.099	18.2483	0.2794
	5.099	5.099	18.0278	0.2828
	5.099	5.099	17.2627	0.2954
	5	5	18	0.2778
	6.0828	5.099	17.2627	0.3239
	5	5.099	18	0.2805
	5.099	5.099	17.2627	0.2954
	5	5	18.0278	0.2774
	5.099	5.099	17.2627	0.2954
	5	5	17	0.2941
	6.0828	5.099	17.2627	0.3239
	5	5.099	18.0278	0.2801
	5.099	5.099	17.2627	0.2954
	5.099	5	18.0278	0.2801
	5	5.099	18.2483	0.2767
	5	5.099	18.0278	0.2801
	5.099	5.099	17.1172	0.2979
	5.099	5	18.0278	0.2801
	5.099	5.099	18.1108	0.2815
	5	5.099	17.0294	0.2965
	5.099	6.0828	18.2483	0.3064
	5	5.099	18.0278	0.2801
	5.099	5.099	18.2483	0.2794
	5	5.099	18.0278	0.2801
	5	6.0828	18.2483	0.3037
	5	5.099	18.0278	0.2801
	5	6.0828	18.2483	0.3037
	6.0828	5	18.0278	0.3074
	5.099	6.0828	18.2483	0.3064
	5	5.099	18.0278	0.2801
	5.099	6.0828	18.2483	0.3064
	5	5.099	18.0278	0.2801
	5.099	6.0828	18.2483	0.3064
	5	5.099	18.0278	0.2801
	5.099	4.1231	17.2627	0.2671
	5	5.099	18.0278	0.2801
	5.099	6.0828	18.2483	0.3064
	5	5.099	18.0278	0.2801
	5.099	6.0828	17.2627	0.3239
	5	5.099	18.0278	0.2801
	5	6.0828	18.2483	0.3037
	5	5.099	17	0.297
	5.099	6.0828	18.2483	0.3064
	5	4.1231	18	0.2534
	5	5.099	18.1108	0.2788
	5	5	17.0294	0.2936
	5.099	5.099	18.1108	0.2815
	5	5	17.0294	0.2936
	5.099	5.099	18.2483	0.2794
	5	5	17	0.2941
	5.099	5.099	18.2483	0.2794
	5	5	17.0294	0.2936
	5.099	5.099	18.2483	0.2794
	5	5	17.0294	0.2936
	5.099	6.0828	18.2483	0.3064
	5	5	17	0.2941
	5.099	5.099	18.2483	0.2794
	5	5	17.0294	0.2936
	6.0828	6.0828	18.2483	0.3333
	5	5	17	0.2941
	5.099	5.099	18.2483	0.2794
	5	5	17.0294	0.2936
	5.099	5.099	18.2483	0.2794
	5	5	17	0.2941
	5.099	6.0828	18.2483	0.3064
	5	5	17.0294	0.2936
	5.099	6.0828	18.2483	0.3064
	5	5	17.0294	0.2936
	6.0828	6.0828	18.2483	0.3333
	5	5	17	0.2941
	5.099	6.0828	18.2483	0.3064
	5	5	17	0.2941
	6.0828	6.0828	18.2483	0.3333
	5	5	17.0294	0.2936
	5.099	5.099	18.2483	0.2794
	5	5	17.0294	0.2936
	5.099	6.0828	18.2483	0.3064
	5	5	17.0294	0.2936
	5.099	5.099	18.2483	0.2794
	5	5	17	0.2941
	5.099	6.0828	18.2483	0.3064
	5	5	17	0.2941
	5.099	6.0828	18.2483	0.3064
	5	5	17	0.2941
	5.099	6.0828	18.2483	0.3064
	5	5	17.0294	0.2936
	6.0828	6.0828	18.2483	0.3333
	5	5	17.0294	0.2936
	5.099	6.0828	18.2483	0.3064
	5	5	17.0294	0.2936
	5	6.0828	18.2483	0.3037
	5	5	17.0294	0.2936
	6	5.099	18.2483	0.3041
	5	5	17	0.2941
	6	5.099	18.2483	0.3041
	5	5	17.0294	0.2936
	6	5.099	18.1108	0.3064
	5	5	17	0.2941
	6.0828	5.099	18.2483	0.3064
	5	5	17.0294	0.2936
	5	5.099	18.2483	0.2767
	5	5	17.0294	0.2936
	6	5.099	18.2483	0.3041
	5	5	17.0294	0.2936
	6.0828	5.099	18.2483	0.3064
	5	5	17.0294	0.2936
	6	5.099	18.2483	0.3041
	5	5	17.0294	0.2936
	6.0828	5.099	18.1108	0.3087
	5	5	17	0.2941
	6.0828	5.099	18.1108	0.3087
	5	5	17	0.2941
	6.0828	5	18.1108	0.306
	5	5	17.0294	0.2936
	6.0828	5	18.1108	0.306
	5	5	17	0.2941
	6.0828	5.099	18.2483	0.3064
	5	5	17	0.2941
	5.099	5	18.1108	0.2788
	5	5	17	0.2941
	5.099	5	18.2483	0.2767
	5	4	17.0294	0.2642
	5.099	5.099	18.1108	0.2815
	5.099	4	17.0294	0.2672
	5.099	5	18.1108	0.2788
	5.099	4	17.0294	0.2672
	5.099	5	18.2483	0.2767
	5	5	17.0294	0.2936
	5.099	5.099	18.1108	0.2815
	5	5	17.0294	0.2936
	6	5.099	18.1108	0.3064
	5	4	18.0278	0.2496
	5.099	5.099	18.2483	0.2794
	5	5	17.0294	0.2936
	6.0828	5.099	18.1108	0.3087
	5	5	17.0294	0.2936
	5.099	5.099	18.1108	0.2815
	5	6	17.0294	0.323
	6.0828	5.099	18.2483	0.3064
	5	5	17.0294	0.2936
	6.0828	5.099	18.2483	0.3064
	5	5	17.0294	0.2936
	6.0828	5.099	18.2483	0.3064
	5	5	18	0.2778
	5.099	5.099	18.2483	0.2794
	5	5	17.0294	0.2936
	6.0828	5.099	18.2483	0.3064
	5	5	18.0278	0.2774
	6.0828	5.099	18.2483	0.3064
	5	5	17.0294	0.2936
	5.099	5	18.2483	0.2767
	5	5	17.0294	0.2936
	6.0828	5.099	18.2483	0.3064
	5	5	17.0294	0.2936
	6.0828	5.099	17.2627	0.3239
	5	4	17.0294	0.2642
	5	5.099	18.2483	0.2767
	5	5	17.0294	0.2936
	5	5.099	18.1108	0.2788
	5	5	17.0294	0.2936
	5	5.099	18.2483	0.2767
	6	6	17.0294	0.3523
	5.099	6.0828	18.2483	0.3064
	5	5	17.0294	0.2936
	5.099	5.099	18.2483	0.2794
	5	5	17.0294	0.2936
	5.099	5.099	18.1108	0.2815
	5	6	17.0294	0.323
	6.0828	5.099	18.2483	0.3064
	6	6	17.0294	0.3523
	5.099	6.0828	18.2483	0.3064
	5	6	17.0294	0.323
	6.0828	5.099	18.2483	0.3064
	5	6	17.0294	0.323
	6.0828	5.099	18.2483	0.3064
	5	5	17.0294	0.2936
	5	5.099	17.1172	0.295
	6	5	17.0294	0.323
	5	5.099	17.2627	0.2925
	5	6.0828	18.0278	0.3074
	5.099	6.0828	18.2483	0.3064
	5	5.099	18.0278	0.2801
	5.099	6.0828	18.2483	0.3064
	6	6	17.0294	0.3523
	5.099	5.099	18.2483	0.2794
	5	5	17.0294	0.2936
	6.0828	5.099	18.1108	0.3087
	5	5	17.0294	0.2936
	5.099	5	18.2483	0.2767
	5	6	17.0294	0.323
	5.099	5.099	18.2483	0.2794
	6.0828	6	18.0278	0.3351
	5.099	6	18.2483	0.3041
	6.0828	6	17.0294	0.3548
	5.099	6.0828	18.2483	0.3064
	5	5	17.0294	0.2936
	5.099	5	18.2483	0.2767
	5	4	18	0.25
	4.1231	5	18.2483	0.25
	5	4	17	0.2647
	4.1231	5.099	17.2627	0.2671
	5	5	18	0.2778
	4.1231	5.099	17.2627	0.2671
	5	4	17	0.2647
	4.1231	5	18.2483	0.25
	5	4	17	0.2647
	4.1231	5	18.2483	0.25
	5	4	17	0.2647
	5	5.099	18.2483	0.2767
	5.099	4	17	0.2676
	4.1231	5.099	17.2627	0.2671
	5	4	17	0.2647
	5.099	5	18.2483	0.2767
	5.099	4	18.0278	0.2524
	5.099	5.099	18.2483	0.2794
	5	4	17	0.2647
	4.1231	5	18.2483	0.25
	5	4	17.0294	0.2642
	5.099	5.099	18.2483	0.2794
	5	4	17	0.2647
	4.1231	5.099	18.2483	0.2527
	4	4	18.0278	0.2219
	5.099	5	18.2483	0.2767
	5	4	17	0.2647
	5.099	5.099	18.2483	0.2794
	4	4	17.0294	0.2349
	4	4.1231	18.1108	0.2243
	3	2	19	0.1316
	3.1623	3	18.1108	0.1701
	3.1623	2	19	0.1358
	2.2361	2	19.105	0.1109
	3	2	18	0.1389
	2	3.1623	19.105	0.1351
	3	2	18	0.1389
	3	3	18.1108	0.1656
	3	3	19	0.1579
	3.1623	3	18.1108	0.1701
	4	3	18.0278	0.1941
	3.1623	4.1231	18.1108	0.2011
	4	4	18.0278	0.2219
	4.1231	4	18.1108	0.2243
	4	4	17	0.2353
	4.1231	4.1231	18.1108	0.2277
	4	4	17	0.2353
	5.099	4	18.2483	0.2493
	4	4	17	0.2353
	5.099	4	18.2483	0.2493
	4	4	17	0.2353
	4.1231	4.1231	17.2627	0.2388
	5	4	17	0.2647
	4.1231	5	18.2483	0.25
	4	4	17	0.2353
	4.1231	5.099	17.2627	0.2671
	5	4	17	0.2647
	5.099	5.099	17.2627	0.2954
	4	4	17	0.2353
	4.1231	5.099	17.2627	0.2671
	5	4	17	0.2647
	5.099	5.099	18.2483	0.2794
	5	4	17	0.2647
	4.1231	5.099	17.2627	0.2671
	5	4	17	0.2647
	4.1231	5.099	18.2483	0.2527
	5	4	17	0.2647
	4.1231	5.099	18.2483	0.2527
	5	4	18	0.25
	4	5.099	18.2483	0.2493
	5	5	17	0.2941
	4	5.099	18.2483	0.2493
	5	4	17	0.2647
	4.1231	5.099	17.2627	0.2671
	5	4	17	0.2647
	4.1231	5.099	17.2627	0.2671
	4	5	17.0294	0.2642
	4.1231	5.099	17.2627	0.2671
	5	5	18.0278	0.2774
	4.1231	5.099	18.2483	0.2527
	5	4	17	0.2647
	4.1231	4.1231	17.2627	0.2388
	5	4	17	0.2647
	4.1231	5	18.2483	0.25
	5	5	17.0294	0.2936
	4.1231	5.099	17.2627	0.2671
	5	4	17	0.2647
	4.1231	5	18.2483	0.25
	5	4	17	0.2647
	4.1231	5.099	17.2627	0.2671
	5	4	17	0.2647
	4.1231	5	17.2627	0.2642
	5	4	17	0.2647
	4.1231	5.099	17.2627	0.2671
	5	4	17	0.2647
	4.1231	5.099	17.2627	0.2671
	5	4	17	0.2647
	4.1231	5.099	17.2627	0.2671
	5	4	17	0.2647
	4.1231	5.099	18.2483	0.2527
	5	5	17.0294	0.2936
	5.099	5.099	18.2483	0.2794
	5	4	18.0278	0.2496
	5.099	5	18.2483	0.2767
	4	4	18.0278	0.2219
	5.099	5	18.2483	0.2767
	5	4	17.0294	0.2642
	5.099	5	18.2483	0.2767
	5	4	17.0294	0.2642
	5.099	5	18.2483	0.2767
	5	5.099	18.0278	0.2801
	5.099	5.099	18.2483	0.2794
	5	4	17.0294	0.2642
	5.099	5	18.2483	0.2767
	6	5.099	18.0278	0.3078
	5.099	6.0828	18.2483	0.3064
	6	5	18.0278	0.3051
	5.099	6.0828	18.2483	0.3064
	6	5.099	18.0278	0.3078
	5.099	6.0828	18.2483	0.3064
	5	5	18.0278	0.2774
	5.099	5.099	18.2483	0.2794
	5	4	18.0278	0.2496
	5	5.099	18.1108	0.2788
	5	5.099	18.0278	0.2801
	5	5.099	18.2483	0.2767
	5	5.099	18.0278	0.2801
	5	5.099	18.2483	0.2767
	5	5	18.0278	0.2774
	5.099	5.099	18.2483	0.2794
	5	5	17	0.2941
	5.099	5.099	18.2483	0.2794
	5	5	17	0.2941
	5.099	6.0828	18.2483	0.3064
	5	5	17	0.2941
	5.099	6	18.2483	0.3041
	5	4	17.0294	0.2642
	5.099	5.099	18.2483	0.2794
	5	5	17.0294	0.2936
	5.099	5	18.1108	0.2788
	5	4	17.0294	0.2642
	5.099	5	18.1108	0.2788
	5	5	17.0294	0.2936
	5.099	5.099	18.2483	0.2794
	6	5	19.0263	0.2891
	5	5.099	19.2354	0.2625
	5.099	5	18	0.2805
	5.099	5.099	18.2483	0.2794
	5	5	18.0278	0.2774
	5.099	5.099	18.2483	0.2794
	5	5.099	18.1108	0.2788
	5.099	5.099	17.2627	0.2954
	5	5.099	18.0278	0.2801
	5.099	5.099	18.2483	0.2794
	5	5	17.0294	0.2936
	5.099	5	18.2483	0.2767
	5	5	17	0.2941
	4.1231	5.099	17.2627	0.2671
	5	5	17	0.2941
	4.1231	5.099	18.2483	0.2527
	5.099	5	17.1172	0.295
	5.099	5.099	17.2627	0.2954
	5.099	5	17.0294	0.2965
	6.0828	5.099	18.2483	0.3064
	6	5	18.0278	0.3051
	5.099	5.099	18.2483	0.2794
	5	5.099	18.0278	0.2801
	5.099	5.099	18.2483	0.2794
	5	5	18.0278	0.2774
	5.099	5.099	18.2483	0.2794
	5	5	18.0278	0.2774
	5.099	5.099	18.2483	0.2794
	5	5	18.0278	0.2774
	5.099	5	18.2483	0.2767
	5	5	18.0278	0.2774
	5.099	5.099	18.2483	0.2794
	5	5	18.0278	0.2774
	5.099	5.099	18.1108	0.2815
	5	5	18.0278	0.2774
	5.099	5	18.1108	0.2788
	5	4	18.0278	0.2496
	5.099	5.099	18.2483	0.2794
	5	5	18.0278	0.2774
	5.099	5	18.1108	0.2788
	5	5	18.0278	0.2774
	5.099	5.099	18.2483	0.2794
	5	5	18	0.2778
	6.0828	5.099	18.2483	0.3064
	5	5	18	0.2778
	6.0828	5.099	18.2483	0.3064
	5	5.099	18	0.2805
	6.0828	5.099	18.2483	0.3064
	5	5.099	18	0.2805
	5.099	5.099	18.2483	0.2794
	5	5.099	18	0.2805
	5.099	6.0828	18.2483	0.3064
	6	5	18.0278	0.3051
	5.099	5.099	18.2483	0.2794
	6	5.099	18.0278	0.3078
	5.099	6.0828	18.2483	0.3064
	5	5.099	18.0278	0.2801
	5.099	5.099	18.2483	0.2794
	5	5.099	18	0.2805
	5.099	5.099	18.2483	0.2794
	5	5.099	18.0278	0.2801
	6.0828	6.0828	18.2483	0.3333
	5	5	18.0278	0.2774
	5.099	5.099	18.2483	0.2794
	5	5.099	18.0278	0.2801
	5	5.099	17.2627	0.2925
	5	5.099	18.0278	0.2801
	5	5.099	17.2627	0.2925
	5	5	18.0278	0.2774
	5.099	6.0828	18.2483	0.3064
	5	5	18.0278	0.2774
	5.099	5.099	18.2483	0.2794
	5	5.099	18.1108	0.2788
	5.099	5.099	18.2483	0.2794
	6	5	18.0278	0.3051
	5.099	5.099	18.2483	0.2794
	5	5.099	18	0.2805
	5.099	5.099	18.2483	0.2794
	6.0828	5	18.0278	0.3074
	5.099	5.099	18.2483	0.2794
	5	5	18.1108	0.2761
	5.099	5.099	18.2483	0.2794
	5	5.099	18	0.2805
	5	6.0828	18.2483	0.3037
	6	5.099	18.0278	0.3078
	5.099	6.0828	18.2483	0.3064
	5	5	18.0278	0.2774
	5.099	6.0828	18.2483	0.3064
	5	5.099	18.0278	0.2801
	5.099	5.099	18.2483	0.2794
	6	5.099	18.0278	0.3078
	5.099	6.0828	18.2483	0.3064
	5	5.099	18	0.2805
	5.099	5.099	18.2483	0.2794
	5.099	5	18.0278	0.2801
	5.099	5.099	18.2483	0.2794
	5	5	18.0278	0.2774
	5.099	6.0828	18.2483	0.3064
	6	5	18.0278	0.3051
	5.099	6.0828	18.2483	0.3064
	6.0828	5	18.0278	0.3074
	5.099	6.0828	18.2483	0.3064
	5	5	18.0278	0.2774
	5.099	5.099	18.2483	0.2794
	6.0828	5	18.0278	0.3074
	5	6.0828	18.2483	0.3037
	5.099	5	18.0278	0.2801
	5	5.099	18.2483	0.2767
	5.099	5	17	0.297
	5	5.099	18.2483	0.2767
	6.0828	5	18.0278	0.3074
	5	6.0828	19.2354	0.2881
	6	5	18.0278	0.3051
	5.099	6.0828	18.2483	0.3064
	6	5	18.0278	0.3051
	5	6.0828	18.2483	0.3037
	6.0828	5	18.0278	0.3074
	5	5.099	18.2483	0.2767
	5.099	5	18.0278	0.2801
	5.099	5.099	19.2354	0.2651
	6	5	18.0278	0.3051
	5	6.0828	19.2354	0.2881
	5	5	18.0278	0.2774
	5.099	5	18.2483	0.2767
	5	4	17.0294	0.2642
	5.099	5.099	18.2483	0.2794
	5	5	17.0294	0.2936
	5.099	5.099	17.2627	0.2954
	6	5	17.0294	0.323
	5.099	6.0828	18.2483	0.3064
	6	5	17.0294	0.323
	5	6.0828	18.2483	0.3037
	6	5	17.0294	0.323
	5.099	6.0828	18.2483	0.3064
	5	5	17.0294	0.2936
	5.099	5	18.2483	0.2767
	5	4	17.0294	0.2642
	5.099	5	18.2483	0.2767
	4	4	17	0.2353
	5.099	4.1231	17.2627	0.2671
	4	3	17.0294	0.2055
	4	4	18.1108	0.2209
	4	4	17	0.2353
	4.1231	4.1231	18.2483	0.2259
	5	4	17	0.2647
	4.1231	5	18.2483	0.25
	5	4	17	0.2647
	4.1231	5.099	18.2483	0.2527
	5	5	17	0.2941
	5.099	5.099	18.2483	0.2794
	5	5.099	18	0.2805
	5.099	5.099	18.2483	0.2794
	5	5	17	0.2941
	5.099	5.099	18.2483	0.2794
	5	5.099	18	0.2805
	5.099	5.099	18.2483	0.2794
	5	5.099	18.0278	0.2801
	5.099	4.1231	18.2483	0.2527
	5	5	18	0.2778
[truncated: 19,329 more rows]

## Sheet: eyeblink8-9
	A	B	C	EAR
	4.1231	5	17	0.2683
	4	5.099	17.2627	0.2635
	5	5	17	0.2941
	5.099	5.099	18.2483	0.2794
	4	5	18.0278	0.2496
	5.099	4.1231	18.1108	0.2546
	4.1231	3	18	0.1979
	4.4721	4.1231	19.2354	0.2234
	3	3	17.1172	0.1753
	4.1231	4.1231	18.4391	0.2236
	4	4.1231	17.1172	0.2373
	5.099	4.1231	17.72	0.2602
	4.1231	4.1231	17.0294	0.2421
	4.1231	4.1231	17.2627	0.2388
	6.0828	6	17.0294	0.3548
	7.0711	6.0828	18.2483	0.3604
	5	6.0828	18.0278	0.3074
	6	5.099	17.2627	0.3215
	5	5	18.0278	0.2774
	4	4	17.1172	0.2337
	5	4	18	0.25
	5.099	4	17.2627	0.2635
	4.1231	4.1231	17.0294	0.2421
	4	4	17.2627	0.2317
	4	5	17.1172	0.2629
	5.3852	5.3852	18.0278	0.2987
	3	3	17.1172	0.1753
	3.1623	2.2361	17.72	0.1523
	6	5	18.0278	0.3051
	5.099	5.099	17.4642	0.292
	4.1231	5.099	16.1245	0.286
	4.1231	5.099	16.2788	0.2833
	4	4.1231	18.0278	0.2253
	4.1231	4.1231	17.2627	0.2388
	5.099	5.099	19.2354	0.2651
	4.1231	5.099	18.1108	0.2546
	4	4	17	0.2353
	4.4721	4.1231	17.72	0.2425
	4	4	19	0.2105
	5.099	5.099	19.2354	0.2651
	4.1231	5	19.0263	0.2397
	5.099	5.099	19.2354	0.2651
	4	4	17	0.2353
	4.1231	3.1623	17.2627	0.211
	5	4	17	0.2647
	5	5.099	17.2627	0.2925
	4	4	17	0.2353
	4.1231	5	18.2483	0.25
	4	4	17.0294	0.2349
	5	5.099	17.2627	0.2925
	4	4	17.0294	0.2349
	4	5.099	17.2627	0.2635
	4	4	17.0294	0.2349
	5.099	5	18.2483	0.2767
	4	4	17.0294	0.2349
	4	5.099	17.2627	0.2635
	4	4	17.0294	0.2349
	4	5	18.2483	0.2466
	4	4	17	0.2353
	4	5.099	17.2627	0.2635
	4	5	17.0294	0.2642
	4	5	17.2627	0.2607
	4.1231	4.1231	17	0.2425
	4	5.099	17.1172	0.2658
	4.1231	4.1231	17	0.2425
	4.1231	5.099	17.2627	0.2671
	4.1231	4.1231	17.0294	0.2421
	4	5.099	17.2627	0.2635
	4	5	17	0.2647
	4.1231	5.099	17.2627	0.2671
	4	5.099	17	0.2676
	4.1231	5.099	17.2627	0.2671
	5	4	17	0.2647
	5.099	4.1231	17.1172	0.2694
	5	5	17	0.2941
	5.099	5.099	17.2627	0.2954
	5	4	17	0.2647
	4.1231	4.1231	17.1172	0.2409
	4	4	17	0.2353
	4.1231	4.1231	17.1172	0.2409
	4	5	17	0.2647
	4.1231	5.099	17.2627	0.2671
	5	4	18	0.25
	5.099	4	17.1172	0.2658
	5	4	18	0.25
	5.099	4	18.1108	0.2512
	5	4	18	0.25
	5.099	4	18.1108	0.2512
	5.099	4.1231	18	0.2562
	5.099	4	18.2483	0.2493
	5	5.099	17.0294	0.2965
	5	5.099	17.2627	0.2925
	5.099	5.099	17.0294	0.2994
	5.099	5	17.2627	0.2925
	5	5.099	17.0294	0.2965
	5.099	6.3246	17.2627	0.3309
	5.099	5.099	17.0294	0.2994
	5.099	6	18.2483	0.3041
	5.099	5.099	17.0294	0.2994
	5.099	6.0828	17.2627	0.3239
	5	5.099	17.0294	0.2965
	5.099	6.0828	18.2483	0.3064
	5	5	17.0294	0.2936
	6.0828	6.0828	17.2627	0.3524
	5	5.099	17.0294	0.2965
	6.0828	6.0828	18.2483	0.3333
	5	5.099	18.0278	0.2801
	6.0828	6.0828	18.2483	0.3333
	5	5	16.0312	0.3119
	5.099	6.0828	17.2627	0.3239
	6	5	18.0278	0.3051
	5.099	6.0828	18.2483	0.3064
	6	5	17	0.3235
	5	5.099	17.2627	0.2925
	6	6	17	0.3529
	6.0828	5.099	17.2627	0.3239
	6	6	17.0294	0.3523
	6.0828	5.099	16.2788	0.3434
	5	6	17	0.3235
	6.0828	5.099	17.2627	0.3239
	6	5	17.0294	0.323
	6.0828	5.099	17.2627	0.3239
	5	6	17.0294	0.323
	6.0828	5.099	17.2627	0.3239
	5	6	17	0.3235
	6.0828	5.099	17.2627	0.3239
	5	4	17.0294	0.2642
	4.1231	5.099	17.4642	0.264
	3	3	17	0.1765
	3.1623	2.2361	17.2627	0.1564
	3	2	18	0.1389
	3.1623	3.1623	17.1172	0.1847
	2	3	18.0278	0.1387
	3.1623	3	17.2627	0.1785
	3	2	18	0.1389
	3.1623	3.1623	17.1172	0.1847
	3	3	18	0.1667
	4.1231	3.1623	17.1172	0.2128
	4	3	17.0294	0.2055
	4.1231	4.1231	17.2627	0.2388
	4	4	17	0.2353
	4.1231	4.1231	17.2627	0.2388
	5	5	17	0.2941
	4.1231	5.099	17.2627	0.2671
	4	4	17	0.2353
	4.1231	4.1231	17.2627	0.2388
	5	4	17	0.2647
	5.099	5.099	17.2627	0.2954
	5	4	17	0.2647
	5.099	4	18.2483	0.2493
	5	5	17	0.2941
	5	4.1231	17.2627	0.2642
	5	4	17	0.2647
	5	5.099	17.2627	0.2925
	5	4	17	0.2647
	4.1231	5.099	17.2627	0.2671
	4	4	17.0294	0.2349
	4	5.099	17.2627	0.2635
	4	4	17.0294	0.2349
	4.1231	5.099	17.2627	0.2671
	4	4	17.0294	0.2349
	4.1231	5.099	17.2627	0.2671
	4	4	17.0294	0.2349
	4.1231	4.1231	17.1172	0.2409
	4	4	17	0.2353
	4.1231	5.099	17.2627	0.2671
	4	4	17	0.2353
	4.1231	4.1231	17.1172	0.2409
	4	3	17.0294	0.2055
	5.099	4.1231	17.1172	0.2694
	4	3	18.0278	0.1941
	4.1231	4.1231	17.1172	0.2409
	4	3	18	0.1944
	4.1231	4.1231	17.2627	0.2388
	4	4	17.0294	0.2349
	4.1231	4.1231	17.2627	0.2388
	4	4	17	0.2353
	5.099	4.1231	17.1172	0.2694
	4	4	18.0278	0.2219
	5.099	4.1231	17.1172	0.2694
	4	3	18.0278	0.1941
	4.1231	4.1231	17.2627	0.2388
	4	3	17	0.2059
	4.1231	4.1231	17.2627	0.2388
	4	3	17.0294	0.2055
	5	4.1231	17.1172	0.2665
	4	4	17.0294	0.2349
	5	4.1231	17.1172	0.2665
	4	4	17	0.2353
	5.099	4	18.1108	0.2512
	4	4	17.0294	0.2349
	5.099	4.1231	17.2627	0.2671
	4	4	18.0278	0.2219
	4	5.099	18.2483	0.2493
	4	4	17	0.2353
	4.1231	5.099	17.2627	0.2671
	4	4	18	0.2222
	4.1231	4.1231	17.1172	0.2409
	4	4	17	0.2353
	4.1231	5.099	17.2627	0.2671
	4	5	17	0.2647
	4.1231	5.099	17.2627	0.2671
	4	3	18.0278	0.1941
	4.1231	4.1231	17.2627	0.2388
	4	4.1231	17	0.2389
	4.1231	4.1231	17.1172	0.2409
	4	5	17	0.2647
	4.1231	5.099	17.2627	0.2671
	4	4.1231	17	0.2389
	4.1231	5.099	17.2627	0.2671
	4	4	17	0.2353
	4.1231	5.099	17.2627	0.2671
	4	4	17	0.2353
	4.1231	4.1231	17.2627	0.2388
	4	4	17	0.2353
	4.1231	4	18.2483	0.2226
	4	4	17.0294	0.2349
	4.1231	5.099	17.2627	0.2671
	4	4	17	0.2353
	4.1231	5.099	17.2627	0.2671
	4	4	17	0.2353
	4.1231	4.1231	17.1172	0.2409
	4	3	17	0.2059
	4.1231	4.1231	17.1172	0.2409
	4	4	17	0.2353
	4.1231	4.1231	17.2627	0.2388
	4	4	17	0.2353
	4.1231	4.1231	17.2627	0.2388
	4	4	17	0.2353
	4.1231	4.1231	17.2627	0.2388
	4	4	18	0.2222
	5.099	4.1231	17.1172	0.2694
	4	5.099	17	0.2676
	4.1231	4.1231	17.1172	0.2409
	4	4	17	0.2353
	4.1231	4.1231	17.2627	0.2388
	4.1231	4	17.0294	0.2385
	4.1231	4	17.2627	0.2353
	4.1231	4	17	0.2389
	4	4	17.2627	0.2317
	4	4.1231	17.0294	0.2385
	4.1231	5.099	17.2627	0.2671
	5.099	4.1231	17.0294	0.2708
	5.099	5	18.2483	0.2767
	5	4	17.0294	0.2642
	4	5.099	16.2788	0.2795
	4.1231	4.1231	17.0294	0.2421
	4.1231	5.3852	17.2627	0.2754
	4.1231	5.099	17.0294	0.2708
	5.099	5	17.2627	0.2925
	4.1231	4.1231	17.0294	0.2421
	5.099	5	17.2627	0.2925
	4	5	18.0278	0.2496
	5.099	5	16.2788	0.3102
	5	4	18.0278	0.2496
	4.1231	5.099	16.2788	0.2833
	4.1231	4.1231	17.0294	0.2421
	5.099	5	17.2627	0.2925
	5	4	17.0294	0.2642
	4.1231	5	18.2483	0.25
	5.099	4.1231	17.0294	0.2708
	5.099	5.099	17.2627	0.2954
	5	4.1231	17.0294	0.2679
	4.1231	5	17.2627	0.2642
	4	4	17.0294	0.2349
	5.099	5	17.2627	0.2925
	5	4	17.0294	0.2642
	4.1231	5.099	18.2483	0.2527
	5.099	4.1231	17.0294	0.2708
	5.099	5	18.2483	0.2767
	4	4	18.0278	0.2219
	4.1231	5.099	17.2627	0.2671
	5	4.1231	17.0294	0.2679
	5.099	5.099	17.2627	0.2954
	4	4	18.0278	0.2219
	5.099	5	17.2627	0.2925
	5	4	18.0278	0.2496
	4.1231	5	17.2627	0.2642
	5	4	17.0294	0.2642
	5.099	5.099	17.2627	0.2954
	5	4	17.0294	0.2642
	5.099	5.099	17.2627	0.2954
	4	4	17.0294	0.2349
	4.1231	5.099	17.2627	0.2671
	5	4	17.0294	0.2642
	5.099	5.099	17.2627	0.2954
	4	4	17.0294	0.2349
	4.1231	5.099	17.1172	0.2694
	5	4	17	0.2647
	5.099	5.099	17.2627	0.2954
	4	4	17.0294	0.2349
	5.099	5.099	17.2627	0.2954
	5	4	18.0278	0.2496
	5.099	5.099	17.2627	0.2954
	5	4	18.0278	0.2496
	5.099	5	17.2627	0.2925
	5	4	18.0278	0.2496
	5.099	5.099	17.2627	0.2954
	5	4.1231	17.0294	0.2679
	5.099	5.099	17.2627	0.2954
	5	4	16.0312	0.2807
	5.099	5.099	17.2627	0.2954
	5	4	17.0294	0.2642
	5.099	5.099	17.2627	0.2954
	5.099	5.099	17.0294	0.2994
	5.099	5	18.2483	0.2767
	5.099	4	17.0294	0.2672
	5.099	5.099	17.2627	0.2954
	4	5	17	0.2647
	5.099	5.099	17.2627	0.2954
	4	5	17	0.2647
	4.1231	5.099	17.2627	0.2671
	4	5	17	0.2647
	4.1231	5.099	17.2627	0.2671
	4	4	17.0294	0.2349
	4.1231	5.099	17.2627	0.2671
	4	5	17.0294	0.2642
	4.1231	5.099	17.2627	0.2671
	4	5	17.0294	0.2642
	4.1231	5.099	17.2627	0.2671
	4	5	17	0.2647
	5.099	5.099	17.2627	0.2954
	4	5	17.0294	0.2642
	5.099	5.099	17.2627	0.2954
	4	5	17	0.2647
	4.1231	5.099	17.2627	0.2671
	4.1231	5.099	17	0.2712
	5.099	5.099	17.1172	0.2979
	4	5	17.0294	0.2642
	5.099	5.099	17.2627	0.2954
	4	5	17.0294	0.2642
	4	5	17.2627	0.2607
	5	5	17	0.2941
	5.099	5	16.2788	0.3102
	4	5.099	17.0294	0.2672
	5.099	5.099	17.2627	0.2954
	4.1231	5.099	17.0294	0.2708
	4.1231	5	17.2627	0.2642
	4	5	17	0.2647
	5	5.099	17.2627	0.2925
	4	5	17	0.2647
	4	5.099	17.2627	0.2635
	4.1231	5	17	0.2683
	4	5	16.2788	0.2764
	5.099	5	17.0294	0.2965
	5	5.099	17.2627	0.2925
	5	5	17	0.2941
	6	5.099	17.2627	0.3215
	5	5	17	0.2941
	4	5.099	17.2627	0.2635
	5	5	17	0.2941
	5.099	5.099	17.2627	0.2954
	5	5	17	0.2941
	5.099	5.099	17.2627	0.2954
	5	5	17	0.2941
	4	5.099	17.2627	0.2635
	5	5	17	0.2941
	4.1231	5.099	17.2627	0.2671
	5	5	17	0.2941
	5.099	5.099	17.2627	0.2954
	5	5	17	0.2941
	5.099	5.099	17.2627	0.2954
	5	4	17	0.2647
	5.099	5.099	17.2627	0.2954
	5	5	17	0.2941
	5.099	5.099	17.2627	0.2954
	5	5	17	0.2941
	5.099	5.099	18.2483	0.2794
	5	5	17.0294	0.2936
	5.099	5.099	17.2627	0.2954
	5	5	17	0.2941
	5	5.099	17.4642	0.2891
	5	5	17	0.2941
	5	5.099	17.2627	0.2925
	5	5	17	0.2941
	5	5.099	16.4924	0.3062
	5	5	17	0.2941
	5	5.099	17.2627	0.2925
	5	5	17	0.2941
	4	5	16.2788	0.2764
	5.099	5.099	17	0.2999
	5.099	5	16.2788	0.3102
	5.099	5.099	17	0.2999
	5.099	5	17.2627	0.2925
	5	5	17	0.2941
	5.099	5	17.2627	0.2925
	5	5	17	0.2941
	5.099	5.099	17.2627	0.2954
	5	5	17	0.2941
	5.099	5.099	17.2627	0.2954
	5	5	17	0.2941
	5.099	5.099	17.2627	0.2954
	5	5	17	0.2941
	5.099	5.099	17.2627	0.2954
	5	5	17	0.2941
	5.099	5.099	17.2627	0.2954
	5	5	17	0.2941
	5.099	5.099	17.2627	0.2954
	5	5	18	0.2778
	5.099	5.099	17.2627	0.2954
	5	5	17.0294	0.2936
	5.099	6.0828	17.2627	0.3239
	5	5	17	0.2941
	5.099	6	17.2627	0.3215
	5	5	18.0278	0.2774
	5.099	6.0828	17.2627	0.3239
	5	5	17.0294	0.2936
	5.099	5.099	17.2627	0.2954
	5	5	17	0.2941
	5.099	6	17.2627	0.3215
	5	5	17.0294	0.2936
	5.099	5.099	17.2627	0.2954
	5	4	17.0294	0.2642
	5.099	5.099	17.2627	0.2954
	5	5	17.0294	0.2936
	5.099	5.099	17.2627	0.2954
	5	5	17	0.2941
	5.099	5.099	17.2627	0.2954
	5	5	17.0294	0.2936
	6	5.099	17.2627	0.3215
	5	4	17.0294	0.2642
	5.099	5.099	17.2627	0.2954
	5	5	17	0.2941
	5	5.099	17.2627	0.2925
	5	5	17	0.2941
	5	5.099	18.2483	0.2767
	5	5	18	0.2778
	5.099	5	18.2483	0.2767
	5	5.099	18	0.2805
	5.099	6	18.2483	0.3041
	5	5.099	18.0278	0.2801
	5.099	5	18.2483	0.2767
	5	5	18	0.2778
	5.099	4	17.2627	0.2635
	5	5	18	0.2778
	5.099	5	18.2483	0.2767
	5	5	18	0.2778
	5.099	5	17.2627	0.2925
	5	5	18	0.2778
	5.099	6	18.2483	0.3041
	5	5.099	18	0.2805
	5.099	5	17.2627	0.2925
	5	5.099	17	0.297
	5.099	5	18.2483	0.2767
	5	5.099	17	0.297
	5.099	5	18.2483	0.2767
	5	4.1231	18.0278	0.253
	5.099	5.099	17.2627	0.2954
	5	5	17	0.2941
	5.099	5.099	17.2627	0.2954
	5	4	18.0278	0.2496
	5.099	5	18.2483	0.2767
	5	5.099	18.0278	0.2801
	5.099	5.099	17.2627	0.2954
	5	4	17.0294	0.2642
	5.099	5.099	17.2627	0.2954
	5	5.099	18	0.2805
	5.099	5	17.2627	0.2925
	5	4	18.0278	0.2496
	5.099	5.099	17.2627	0.2954
	5	4	18.0278	0.2496
	4.1231	5	18.2483	0.25
	5	5	17	0.2941
	5.099	5.099	18.2483	0.2794
	5	4	17.0294	0.2642
	4.1231	5.099	17.2627	0.2671
	5	4	17.0294	0.2642
	5.099	5.099	17.2627	0.2954
	5	4	18.0278	0.2496
	4.1231	5.099	17.2627	0.2671
	5	4	17.0294	0.2642
	5.099	5.099	17.2627	0.2954
	5	5	17.0294	0.2936
	4.1231	5.099	17.2627	0.2671
	5	5	17.0294	0.2936
	5.099	5	18.2483	0.2767
	5	5	17.0294	0.2936
	4.1231	5	17.2627	0.2642
	5	4	17.0294	0.2642
	4.1231	5	17.2627	0.2642
	5	4	18.0278	0.2496
	4.1231	5.099	17.2627	0.2671
	5	4	17.0294	0.2642
	5.099	5.099	17.2627	0.2954
	4	4	18.0278	0.2219
	4.1231	4.1231	17.2627	0.2388
	2.2361	3.1623	18	0.15
	3.1623	3	18.2483	0.1688
	2	3	18	0.1389
	2	2	18.1108	0.1104
	3	3	18	0.1667
	3	3	18.1108	0.1656
	3	3	17	0.1765
	3	4	18.2483	0.1918
	4	4	17	0.2353
	4.1231	4	18.1108	0.2243
	4	4	17.0294	0.2349
	5	4.1231	17.1172	0.2665
	4	4.1231	18.0278	0.2253
	4	4	18.1108	0.2209
	4	4	18.0278	0.2219
	4.1231	4	18.2483	0.2226
	4.1231	4.1231	17.0294	0.2421
	4	5	18.2483	0.2466
	4	5	17.0294	0.2642
	5	5	17.2627	0.2896
	4	5	17.0294	0.2642
	4.1231	5.099	17.2627	0.2671
	4	5	17.0294	0.2642
	5.099	5.099	17.1172	0.2979
	4	4	17.0294	0.2349
	5.099	5.099	17.2627	0.2954
	4	5	17.0294	0.2642
	4	5.099	17.2627	0.2635
	4	4	17.0294	0.2349
	5.099	4.1231	17.2627	0.2671
	4	5	17.0294	0.2642
	4.1231	5.099	17.2627	0.2671
	4	5	17.0294	0.2642
	4.1231	5.099	17.2627	0.2671
	4	5	18.0278	0.2496
	5.099	5.099	17.2627	0.2954
	4	5	17.0294	0.2642
	4.1231	5.099	17.2627	0.2671
	4	5	18.0278	0.2496
	5.099	5.099	17.2627	0.2954
	4	5	18.0278	0.2496
	5.099	5.099	17.2627	0.2954
	4	5	17	0.2647
	4.1231	5.099	17.2627	0.2671
	4	5	17.0294	0.2642
	4.1231	5.099	17.2627	0.2671
	4	5	17.0294	0.2642
	5.099	5.099	17.2627	0.2954
	4	5	18.0278	0.2496
	4.1231	5	17.2627	0.2642
	4	4	17.0294	0.2349
	4.1231	5.099	17.2627	0.2671
	4	4	17.0294	0.2349
	4.1231	5	17.2627	0.2642
	5	4.1231	18.0278	0.253
	4.1231	5.099	17.2627	0.2671
	4	5	17.0294	0.2642
	4.1231	5.099	17.2627	0.2671
	4	5	17.0294	0.2642
	4.1231	5.099	17.2627	0.2671
	4	4	18.0278	0.2219
	4.1231	5	17.2627	0.2642
	4	5	17.0294	0.2642
	4.1231	5.099	18.2483	0.2527
	4	4	18.0278	0.2219
	5.099	5	18.2483	0.2767
	4	4	17.0294	0.2349
	4.1231	5.099	17.2627	0.2671
	4	4	17.0294	0.2349
	4.1231	5	17.2627	0.2642
	4	4.1231	18.0278	0.2253
	5.099	5.099	17.2627	0.2954
	4	4	17.0294	0.2349
	4.1231	5.099	17.2627	0.2671
	4	4	17.0294	0.2349
	4.1231	5.099	17.2627	0.2671
	5	4	17.0294	0.2642
	4.1231	5.099	17.2627	0.2671
	4	4	18.0278	0.2219
	5	5.099	18.2483	0.2767
	4	4.1231	17.0294	0.2385
	5.099	5.099	18.2483	0.2794
	4	4.1231	17.0294	0.2385
	4.1231	5.099	17.2627	0.2671
	4.1231	4.1231	17.0294	0.2421
	4.1231	5.099	17.2627	0.2671
	4.1231	4.1231	17.0294	0.2421
	5	5.099	18.2483	0.2767
	4	4	17.0294	0.2349
	5	5.099	17.2627	0.2925
	4.1231	4.1231	17.0294	0.2421
	4.1231	5.099	17.2627	0.2671
	4	4.1231	17.0294	0.2385
	4.1231	5	17.2627	0.2642
	4	4	16.0312	0.2495
	4.1231	5.099	17.2627	0.2671
	4	4	17.0294	0.2349
	4.1231	5	17.2627	0.2642
	4	4	18.0278	0.2219
	5.099	5.099	17.2627	0.2954
	4	4	18.0278	0.2219
	4.1231	5.099	17.2627	0.2671
	4	4	17.0294	0.2349
	4.1231	5.099	17.2627	0.2671
	5	4	17.0294	0.2642
	5.099	5	17.2627	0.2925
	5	4	17.0294	0.2642
	5.099	5	17.2627	0.2925
	5	4	18.0278	0.2496
	4.1231	5.099	17.2627	0.2671
	4	4	17.0294	0.2349
	4.1231	5	17.2627	0.2642
	5	4	18.0278	0.2496
	5.099	5	17.2627	0.2925
	4	4	17.0294	0.2349
	4.1231	5.099	16.2788	0.2833
	5.099	4	17.0294	0.2672
	5	5.099	17.2627	0.2925
	4.1231	4	17.0294	0.2385
	5	5.099	17.2627	0.2925
	5	4	17.0294	0.2642
	5.099	5.099	17.2627	0.2954
	4	4	18.0278	0.2219
	4.1231	5	17.2627	0.2642
	4	4	18.0278	0.2219
	4.1231	5.099	17.2627	0.2671
	4	4.1231	18.0278	0.2253
	4.1231	5	17.2627	0.2642
	4.1231	4.1231	17.0294	0.2421
	5.099	5	17.2627	0.2925
	5.099	4	17	0.2676
	5.099	5.099	18.2483	0.2794
	4.1231	4	17.0294	0.2385
	5.099	5.099	17.2627	0.2954
	5	4	18.0278	0.2496
	5.099	5	17.2627	0.2925
	5.099	4	17.0294	0.2672
	5.099	5.099	17.2627	0.2954
	5	4	17.0294	0.2642
	5	5.099	18.2483	0.2767
	5.099	4	17	0.2676
	5	4.1231	18.2483	0.25
	5	5	17	0.2941
	5	5.099	17.2627	0.2925
	5	4	17.0294	0.2642
	5	4.1231	17.2627	0.2642
	5	4	17.0294	0.2642
	5.099	5.099	18.2483	0.2794
	5	4	17.0294	0.2642
	5.099	5.099	18.2483	0.2794
	5	4	17.0294	0.2642
	5.099	5.099	18.2483	0.2794
	5	5	17	0.2941
	5	5.099	18.2483	0.2767
	5	4	17.0294	0.2642
	5.099	5.099	17.2627	0.2954
	5	4	17.0294	0.2642
	5.099	4.1231	18.2483	0.2527
	5.099	5	17	0.297
	5	4.1231	17.2627	0.2642
	5	4	17	0.2647
	5	4.1231	16.2788	0.2802
	5	4	18.0278	0.2496
	5.099	5	17.2627	0.2925
	5	4	17.0294	0.2642
	5	4	17.2627	0.2607
	5	4	17	0.2647
	5.099	4	17.2627	0.2635
	4	4	17	0.2353
	5.099	4.1231	17.2627	0.2671
	5	4	18	0.25
	5.099	4	17.2627	0.2635
	5	4	18.0278	0.2496
	5.099	4.1231	17.2627	0.2671
	5	5	18.0278	0.2774
	5.099	4	17.2627	0.2635
	5	4	17.0294	0.2642
	5.099	4	17.2627	0.2635
	4	3	17	0.2059
	3.1623	4.1231	17.2627	0.211
	3.1623	2	18	0.1434
	3.1623	2	18.2483	0.1414
	2	2	18	0.1111
	2	3	18.1108	0.138
	2.2361	2	18.0278	0.1175
	2.2361	2	17.1172	0.1237
	3	2	17	0.1471
	3.1623	3	17.1172	0.18
	3	3	17	0.1765
	3.1623	3	17.1172	0.18
	4	4	17	0.2353
	3.1623	4.1231	17.2627	0.211
	4	4	17.0294	0.2349
	3	4.1231	17.2627	0.2063
	4	4	17	0.2353
	4	4.1231	18.2483	0.2226
	4	3	17.0294	0.2055
	4.1231	5.099	17.2627	0.2671
	4	3	17	0.2059
	4.1231	4.1231	17.2627	0.2388
	4	4	17	0.2353
	4.1231	5.099	17.2627	0.2671
	4	3	17	0.2059
	4.1231	5.099	17.2627	0.2671
	4	3	17	0.2059
	4.1231	5.099	17.2627	0.2671
	4	4	17.0294	0.2349
	4.1231	5.099	17.2627	0.2671
	4	5	17	0.2647
	4.1231	5.099	17.2627	0.2671
	4	4	17.0294	0.2349
	4.1231	5.099	17.2627	0.2671
	4	4	17.0294	0.2349
	4	5.099	17.2627	0.2635
	4	4	17.0294	0.2349
	4.1231	5.099	17.2627	0.2671
	4	4	17.0294	0.2349
	4.1231	5.099	17.2627	0.2671
	4	4	17.0294	0.2349
	4.1231	5.099	17.2627	0.2671
	4	4	17.0294	0.2349
	4.1231	5.099	17.2627	0.2671
	4	4	17.0294	0.2349
	4.1231	5.099	17.2627	0.2671
	4	4	17.0294	0.2349
	4.1231	5.099	17.2627	0.2671
	4	3	17.0294	0.2055
	4.1231	5.099	17.2627	0.2671
	4	4	17.0294	0.2349
	4.1231	5.099	17.2627	0.2671
	4	4	17.0294	0.2349
	4.1231	4.1231	17.2627	0.2388
	4	4	17.0294	0.2349
	4.1231	4.1231	17.2627	0.2388
	4	4	17.0294	0.2349
	4.1231	5.099	17.2627	0.2671
	4	4	17	0.2353
	4.1231	5.099	17.2627	0.2671
	4	4	17.0294	0.2349
	4.1231	4.1231	17.2627	0.2388
	4	4	17	0.2353
	4.1231	4.1231	17.2627	0.2388
	4	4	18.0278	0.2219
	4.1231	4.1231	17.2627	0.2388
	4.1231	4	18	0.2256
	4.1231	4	18.2483	0.2226
	4.1231	4	17.0294	0.2385
	4.1231	4	17.2627	0.2353
	4.1231	4.1231	18.0278	0.2287
	4.1231	5	17.2627	0.2642
	4	5.099	18	0.2528
	4.1231	5	17.2627	0.2642
	4	5	18	0.25
	4.1231	5.099	17.2627	0.2671
	4	4	18.0278	0.2219
	4.1231	5.099	17.2627	0.2671
	4	4	18.0278	0.2219
	5.099	4.1231	17.2627	0.2671
	4	5	17	0.2647
	4.1231	5.099	17.2627	0.2671
	4	4	18	0.2222
	4.1231	4.1231	17.2627	0.2388
	4	4	18.0278	0.2219
	4.1231	5.099	17.2627	0.2671
	4	4	17	0.2353
	4.1231	4.1231	17.2627	0.2388
	4	4	17	0.2353
	4.1231	5.099	16.2788	0.2833
	4	5	17	0.2647
	4.1231	5.099	17.2627	0.2671
	4	4	17	0.2353
	4.1231	5.099	17.2627	0.2671
	4	4	17	0.2353
	4.1231	5.099	17.2627	0.2671
	4	4	17.0294	0.2349
	4.1231	5.099	17.2627	0.2671
	4	4	18	0.2222
	4.1231	5.099	17.2627	0.2671
	4	4	18.0278	0.2219
	4.1231	5.099	17.2627	0.2671
	4	5	17	0.2647
	4.1231	5.099	17.2627	0.2671
	4	4	17.0294	0.2349
	4.1231	5.099	17.2627	0.2671
	4	5	17	0.2647
	4.1231	5.099	17.2627	0.2671
	4	4	17	0.2353
	4.1231	4.1231	17.2627	0.2388
	4	4	17	0.2353
	4.1231	4.1231	17.2627	0.2388
	4	4	17.0294	0.2349
	4.1231	5.099	17.2627	0.2671
	4	4	17	0.2353
	4.1231	4.1231	17.2627	0.2388
	4	4	17.0294	0.2349
	4.1231	4.1231	17.2627	0.2388
	4	4	17.0294	0.2349
	4.1231	5.099	17.2627	0.2671
	4	4	17	0.2353
	4.1231	4.1231	17.2627	0.2388
	4	4	17.0294	0.2349
	4.1231	4.1231	17.2627	0.2388
	4	4	17.0294	0.2349
	4.1231	5.099	17.2627	0.2671
	4	4	17.0294	0.2349
	4.1231	4.1231	17.2627	0.2388
	4	4	17	0.2353
	4.1231	4.1231	17.2627	0.2388
	4	4	17.0294	0.2349
	5.099	4.1231	17.2627	0.2671
	4	4	17	0.2353
	4.1231	4.1231	17.2627	0.2388
	4	4	17	0.2353
	5	4.1231	17.2627	0.2642
	5	5	17	0.2941
	5.099	4	18.2483	0.2493
	5	4	17	0.2647
	5.099	4	18.2483	0.2493
	5.099	4	17	0.2676
	5	4	17.2627	0.2607
	5.099	5.099	17	0.2999
	5.099	5.099	17.2627	0.2954
	5	5	17	0.2941
	4.1231	5.099	17.1172	0.2694
	5	5.099	17	0.297
	4.1231	5.099	17.1172	0.2694
	5	4	17	0.2647
	5.099	4.1231	17.2627	0.2671
	4	4	17	0.2353
	4.1231	5.099	17.1172	0.2694
	5	4	17	0.2647
	5.099	4.1231	17.1172	0.2694
	4	5	17	0.2647
	4.1231	5.099	17.1172	0.2694
	4	4	17	0.2353
	4.1231	4.1231	17.1172	0.2409
	4	5	17	0.2647
	4.1231	4.1231	17.1172	0.2409
	4	5	17	0.2647
	4.1231	5.099	17.1172	0.2694
	4	4	17	0.2353
	4.1231	5.099	17.2627	0.2671
	4	5	18.0278	0.2496
	4.1231	5.099	17.2627	0.2671
	4	4	17.0294	0.2349
	4.1231	5.099	17.2627	0.2671
	4	5	17	0.2647
	4.1231	5	17.2627	0.2642
	4	4	17	0.2353
	4.1231	4.1231	17.2627	0.2388
	4	4	17	0.2353
	4.1231	5.099	17.2627	0.2671
	4	5	18	0.25
	4.1231	5.099	17.2627	0.2671
	4	4	18	0.2222
	5.099	4.1231	17.2627	0.2671
	4	5	17	0.2647
	5.099	5.099	17.2627	0.2954
	4	5	18	0.25
	5.099	5.099	17.2627	0.2954
	4	5	18.0278	0.2496
	4.1231	5.099	17.2627	0.2671
	4	5	17	0.2647
	5.099	5.099	17.1172	0.2979
	4	5	17.0294	0.2642
	5.099	5.099	17.2627	0.2954
	4	5	17	0.2647
	5.099	5.099	17.1172	0.2979
	4	4	17.0294	0.2349
	4.1231	5.099	17.2627	0.2671
	4	4	17.0294	0.2349
	5.099	5.099	17.1172	0.2979
	5	5	17	0.2941
	5.099	5.099	17.2627	0.2954
	4	4	17.0294	0.2349
	5.099	5.099	17.1172	0.2979
	4	4	18.0278	0.2219
	5.099	5.099	17.4642	0.292
	4	5	17.0294	0.2642
	4.1231	5.099	17.2627	0.2671
	4	5	17.0294	0.2642
	4.1231	5.099	17.1172	0.2694
	4	5	18.0278	0.2496
	4.1231	5.099	17.2627	0.2671
	4	5	18.0278	0.2496
	4.1231	5.099	17.4642	0.264
	4	5	17	0.2647
	4.1231	5.099	16.1245	0.286
	5	5	17	0.2941
	5.099	5.099	17.2627	0.2954
	4	5	17.0294	0.2642
	4.1231	5.099	17.2627	0.2671
	4	4	17.0294	0.2349
	4.1231	5.099	17.1172	0.2694
	5	5	17	0.2941
	5.099	5.099	17.2627	0.2954
	4	4	17.0294	0.2349
	5.099	5.099	17.1172	0.2979
	5	4	17	0.2647
	5.099	4.1231	17.2627	0.2671
	5	4	17	0.2647
	5.099	4.1231	17.2627	0.2671
	5	4	17	0.2647
	5.099	4.1231	17.2627	0.2671
	4	5	17	0.2647
	5.099	4.1231	17.2627	0.2671
	5	4	17	0.2647
	5.099	4.1231	17.2627	0.2671
	5	4	17.0294	0.2642
	5.099	5.099	17.2627	0.2954
	5	4	17.0294	0.2642
	5.099	4.1231	17.2627	0.2671
	5	4	17.0294	0.2642
	5.099	4.1231	17.2627	0.2671
	5	4	17	0.2647
	5.099	4.1231	17.2627	0.2671
	5	4	17	0.2647
	5.099	4.1231	17.2627	0.2671
	5	4	17	0.2647
	5.099	5.099	17.2627	0.2954
	4	5	17.0294	0.2642
	5	5.099	17.2627	0.2925
	3.1623	2	18	0.1434
	3.1623	2.2361	17.1172	0.1577
	2	2	17	0.1176
	2.2361	2	18.2483	0.1161
	2	3	18	0.1389
	3.1623	2.2361	18.1108	0.149
	3	2	18	0.1389
	3	2	17.1172	0.1461
	3	3	17	0.1765
	4.1231	3	17.1172	0.2081
	4	3	17.0294	0.2055
	4.1231	4.1231	17.2627	0.2388
	5	4	17	0.2647
	5.099	5.099	17.2627	0.2954
	5	4	18	0.25
	5.099	5.099	17.2627	0.2954
	5	4	17	0.2647
	5.099	4.1231	17.2627	0.2671
	5	4	18	0.25
	5.099	4.1231	17.2627	0.2671
	4	4	17	0.2353
	5.099	4.1231	17.2627	0.2671
	5	4	18.0278	0.2496
	5.099	4.1231	17.2627	0.2671
	5	4	17.0294	0.2642
	5.099	4.1231	17.2627	0.2671
	5	4	18	0.25
	5.099	4.1231	17.2627	0.2671
	5	4	18	0.25
	5.099	4.1231	17.2627	0.2671
	4	4	18.0278	0.2219
	5.099	4.1231	17.2627	0.2671
	5	5	17	0.2941
	5.099	4	18.2483	0.2493
	5	4	18.0278	0.2496
	5.099	4.1231	17.2627	0.2671
	5	4.1231	18	0.2534
	5	4	18.2483	0.2466
	4.1231	4.1231	17	0.2425
	4.1231	4.1231	17.2627	0.2388
	5	4	17	0.2647
	4	4	17.1172	0.2337
	5	4	17	0.2647
	4	4.1231	17.1172	0.2373
	4	4	17	0.2353
	4.1231	5.099	18.2483	0.2527
	5.099	4.1231	17	0.2712
	4	4.1231	17.4642	0.2326
	4	5	18	0.25
	4	5.099	16.2788	0.2795
	4	4	18.0278	0.2219
	4.1231	4.1231	17.2627	0.2388
	4	4	18.0278	0.2219
	4.1231	4.1231	17.2627	0.2388
	4	4	18.0278	0.2219
	3.1623	4.1231	17.2627	0.211
	3	3	18	0.1667
	3.1623	4.1231	17.2627	0.211
	3	3	18	0.1667
	3.1623	4.1231	17.2627	0.211
	3	3	18	0.1667
	3.1623	3.1623	17.1172	0.1847
	3	3	18	0.1667
	4.1231	3.1623	17.2627	0.211
	3	3	18	0.1667
	3.1623	3.1623	17.2627	0.1832
	3	3	18.0278	0.1664
	3.1623	3	18.2483	0.1688
	3	3	17.0294	0.1762
	3	3.1623	18.2483	0.1688
	3.1623	3	18	0.1712
	3.1623	2.2361	17.2627	0.1564
	3	3	18.0278	0.1664
	2.2361	3.1623	17.2627	0.1564
	2	2	18.0278	0.1109
	2.2361	3	17.2627	0.1517
	2	2	18.0278	0.1109
	2.2361	2	17.2627	0.1227
	2	2	17.0294	0.1174
	2.2361	2.2361	17.2627	0.1295
	2	2	18.0278	0.1109
	2.2361	2.2361	16.4924	0.1356
	2	2.2361	17.0294	0.1244
	2	2.2361	17.4642	0.1213
	2	2	17.0294	0.1174
	2.2361	2.2361	17.4642	0.128
	2	2	17.0294	0.1174
	2	2.2361	17.4642	0.1213
	2	2.2361	17.0294	0.1244
	2.2361	3	17.2627	0.1517
	2	2	18.0278	0.1109
	2.2361	2	17.4642	0.1213
	2.2361	2	18.0278	0.1175
	2.2361	2	17.4642	0.1213
	2	2	17.0294	0.1174
	2.2361	2	17.4642	0.1213
	2	2	17.0294	0.1174
	2.2361	2	17.4642	0.1213
	2	2	17.0294	0.1174
	2	2.2361	17.4642	0.1213
	2	2	17.1172	0.1168
	2.2361	2.2361	17.4642	0.128
	3	3	18.0278	0.1664
	2.2361	3.1623	17.2627	0.1564
	3	2.2361	17.1172	0.1529
	3	3.1623	18.2483	0.1688
	3	2.2361	17.1172	0.1529
	3.1623	3	18.2483	0.1688
	3	2	18.0278	0.1387
	2.2361	3.1623	18.2483	0.1479
	2	2	17.0294	0.1174
	2	3.1623	17.2627	0.1495
	2	2	17.0294	0.1174
	2	2.2361	17.2627	0.1227
	2	2	17.0294	0.1174
	2	2.2361	17.4642	0.1213
	2	2	17.0294	0.1174
	3.1623	3	17.2627	0.1785
	2	2	18.0278	0.1109
	2.2361	3.1623	18.2483	0.1479
	3	2	18	0.1389
	3.1623	3	17.2627	0.1785
	3	2	17	0.1471
	2	3.1623	17.4642	0.1478
	3	2	18.0278	0.1387
	2.2361	3	17.4642	0.1499
	3	2	18	0.1389
	2.2361	3	17.2627	0.1517
	3	3	18.0278	0.1664
	3.1623	3.1623	17.4642	0.1811
	3	3	18.0278	0.1664
	3.1623	3.1623	16.2788	0.1943
	2	3	18.0278	0.1387
	2.2361	3.1623	18.2483	0.1479
	3	3	18.0278	0.1664
	2.2361	3.1623	16.2788	0.1658
	2	2	17.0294	0.1174
	3.1623	3.1623	17.2627	0.1832
	2	2	18.0278	0.1109
	3	3.1623	17.2627	0.1785
	2	2	17.0294	0.1174
	3.1623	3.1623	17.2627	0.1832
	2	2	18.0278	0.1109
	3.1623	3.1623	17.2627	0.1832
	2	2	18	0.1111
	3.1623	3.1623	17.2627	0.1832
	3	2	18	0.1389
	3.1623	2	17.2627	0.1495
	2	2	18	0.1111
	3.1623	3	17.2627	0.1785
	3	2	18	0.1389
	3.1623	3.1623	18.2483	0.1733
	3	2	18	0.1389
	3.1623	2	17.2627	0.1495
	3	2	17.0294	0.1468
	3.1623	3	17.2627	0.1785
	3	3	18	0.1667
	3	3.1623	17.2627	0.1785
	3	3	17.0294	0.1762
	3.1623	4.1231	17.2627	0.211
	3	3	18	0.1667
	3.1623	4.1231	17.2627	0.211
	3	3	18	0.1667
	3.1623	4.1231	17.2627	0.211
	3	3	18.0278	0.1664
	4	4	17.4642	0.229
	3	3	18	0.1667
	3.1623	3.1623	17.2627	0.1832
	3	3	17.0294	0.1762
	4.1231	3.1623	17.2627	0.211
	4	5	17.0294	0.2642
	4.1231	4.1231	17.2627	0.2388
	5	5	17.0294	0.2936
	5.099	5.099	17.2627	0.2954
	6	6.0828	18.0278	0.3351
	6.0828	6.0828	17.2627	0.3524
	5	6.0828	17.1172	0.3237
	5.099	6.0828	17.2627	0.3239
	6	6.0828	17.0294	0.3548
	6.0828	6.3246	17.4642	0.3552
	6	6	17.1172	0.3505
	6.0828	6.0828	17.2627	0.3524
	5	6	17.1172	0.3213
	6.0828	6.0828	17.2627	0.3524
	6	6.0828	17.0294	0.3548
	6.0828	6.0828	17.2627	0.3524
	6.0828	6	17.1172	0.3529
	7.0711	6.0828	17.2627	0.381
	5.099	6	17.0294	0.3259
	6.0828	6.0828	17.1172	0.3554
	6	6	17.0294	0.3523
	5.099	6.0828	17.2627	0.3239
	5	6	17.0294	0.323
	6.0828	5.099	17.1172	0.3266
	6	6	16.0312	0.3743
	5.099	6.0828	17.2627	0.3239
	5	6	17.0294	0.323
	6.0828	5.099	17.2627	0.3239
	6	6	16	0.375
	7	6.0828	17.1172	0.3822
	6.0828	6	18	0.3356
	6	6.0828	17.1172	0.3529
	6	6	16	0.375
	6.0828	6.0828	17.1172	0.3554
	5	5	17.0294	0.2936
	6.0828	6.0828	17.2627	0.3524
	6	6	17	0.3529
	6.0828	6.0828	17.1172	0.3554
	6	6	17	0.3529
	6.0828	6	17.1172	0.3529
	5	5	17.0294	0.2936
	5	6.0828	17.1172	0.3237
	5.099	5.099	16	0.3187
	5.099	6.0828	16.0312	0.3488
	5	6	17	0.3235
	6.0828	5	17.0294	0.3254
	5	5	17.0294	0.2936
	6.0828	6.0828	16.1245	0.3772
	6	6	17.0294	0.3523
	6	6	17.1172	0.3505
	5	6	17.0294	0.323
	6	6	17.1172	0.3505
	6	6	17	0.3529
	5	6	17.0294	0.323
	6	6	16	0.375
	6	5	17.0294	0.323
	5.099	6	16.0312	0.3462
	6.0828	6	17.0294	0.3548
	6.0828	6	16	0.3776
	6.0828	6	16.1245	0.3747
	5	5	16.0312	0.3119
	6.0828	6.0828	16.0312	0.3794
	5.099	5	16.0312	0.315
	6.0828	6	16.0312	0.3769
	5.099	5	16.0312	0.315
	6.0828	5.099	16.0312	0.3488
	5.099	5	17.0294	0.2965
	6.0828	5.099	16.0312	0.3488
	5	5	16.0312	0.3119
	6	5	17.0294	0.323
	5	6	16	0.3438
	6	5	17.0294	0.323
	5.099	6	16	0.3468
	6	6	17.0294	0.3523
	5.099	6	16	0.3468
	6	5	17.0294	0.323
	6	6	17	0.3529
	5	5	17.0294	0.2936
	6	6	17	0.3529
	6	6.0828	17.0294	0.3548
	6	6	17	0.3529
	6.0828	6.0828	16.1245	0.3772
	6	6	17	0.3529
	6.0828	5.099	16.0312	0.3488
	5	6	17	0.3235
	6.0828	6.0828	16.0312	0.3794
	5	5	17	0.2941
	6	5	16.0312	0.3431
	4	4	16	0.25
	3	4	16.0312	0.2183
	2	3	17	0.1471
	3	2	17.0294	0.1468
	3.1623	2	17.0294	0.1516
	3.1623	3	16.1245	0.1911
	2	3	17	0.1471
	3	3.1623	17.0294	0.1809
	3	2	17	0.1471
	3	3	17.0294	0.1762
	3	3	17	0.1765
	2	3.1623	17.0294	0.1516
	4	4	16	0.25
	4	4.1231	16.1245	0.2519
	5	4	17	0.2647
	5.099	5.099	16.1245	0.3162
	5	5	17.0294	0.2936
	6.0828	6.0828	17.1172	0.3554
	5	5	17.0294	0.2936
	6	5.099	17.1172	0.3242
	5	5	17	0.2941
	6.0828	6.0828	16.1245	0.3772
	5	5	17.0294	0.2936
	6	6.0828	17.1172	0.3529
	5	5	17.0294	0.2936
	6.0828	6.0828	17.1172	0.3554
	5	5.099	16.0312	0.315
	6.0828	6.0828	16.1245	0.3772
	5.099	5.099	16.0312	0.3181
	6.0828	6.0828	16.1245	0.3772
	5	5	16	0.3125
	6.0828	6.0828	16.1245	0.3772
	5	5.099	16.0312	0.315
	6.0828	6	16.1245	0.3747
	5.099	5	16.0312	0.315
	6.0828	6	16.1245	0.3747
	5	5	16	0.3125
	6	6	17.1172	0.3505
	5.099	5	16	0.3156
	6	6	17.1172	0.3505
	5.099	5	16.0312	0.315
	6	6	17.1172	0.3505
	5	5	17	0.2941
	5	6	17.1172	0.3213
	5.099	5	16.0312	0.315
	6.0828	6	16.1245	0.3747
	5	5	16	0.3125
	6.0828	6	17.1172	0.3529
	5.099	6	16	0.3468
	6.0828	6.0828	16.1245	0.3772
	5	5	17	0.2941
	6	6	17.1172	0.3505
	5	5	17	0.2941
	6	5	17.1172	0.3213
	5	6	17	0.3235
	6	5	17.1172	0.3213
	5	5.099	17	0.297
	6.0828	6.0828	17.1172	0.3554
	5	5	17	0.2941
	5.099	6.0828	16.1245	0.3467
	5	5	17.0294	0.2936
	6.0828	6.0828	16.1245	0.3772
	5	5.099	17.0294	0.2965
	6.0828	6.0828	17.1172	0.3554
	5	6	16	0.3438
	6.0828	5.099	16.1245	0.3467
	5	6	16	0.3438
	6.0828	6	16.1245	0.3747
	5	6	16	0.3438
	6.0828	6.0828	16.1245	0.3772
	6.0828	6	16	0.3776
	6.0828	6.0828	16.1245	0.3772
	6.0828	6	16	0.3776
	6.0828	6.0828	17.1172	0.3554
	6	6	16	0.375
	6	6.0828	17.1172	0.3529
	6	5	16	0.3438
	6.0828	5.099	17.1172	0.3266
	6	5	17	0.3235
	6.0828	5.099	17.1172	0.3266
	6	5	17	0.3235
	6.0828	5.099	17.1172	0.3266
	6.0828	6.0828	16	0.3802
	6.0828	5.099	17.1172	0.3266
	6	6	16	0.375
	6.0828	6.0828	17.1172	0.3554
	6	6	16	0.375
	6.0828	5.099	16.1245	0.3467
	6	6.0828	16	0.3776
	6.0828	6	16.1245	0.3747
	5.099	5.099	16	0.3187
	6.0828	5	16.1245	0.3437
	5	5	16	0.3125
	6	5	16.1245	0.3411
	5.099	5.099	16.0312	0.3181
	6	5	16.2788	0.3379
	3	4	16	0.2188
	3	4	16.1245	0.2171
	3.1623	2	17.0294	0.1516
	3	3	17.0294	0.1762
	2	2	17.0294	0.1174
	2	3.1623	16.0312	0.161
	3	2	18	0.1389
	2.2361	2	18.1108	0.1169
	2	2	18	0.1111
	2	2	17.1172	0.1168
	2	2	17	0.1176
	2	2.2361	17.0294	0.1244
	3	2	17	0.1471
	2	2	17.0294	0.1174
	2	3	17	0.1471
	3	3	17.1172	0.1753
	3	2	17.0294	0.1468
	2.2361	2	17.0294	0.1244
	3	2	17	0.1471
	3	3	17.0294	0.1762
	3	4	17	0.2059
	4.1231	4.1231	17.1172	0.2409
	4	4	17	0.2353
	5	5.099	17.1172	0.295
	5	4	17	0.2647
	6	5.099	17.1172	0.3242
	5	5	17	0.2941
	5.099	6.0828	16.1245	0.3467
	5	5	17.0294	0.2936
	5.099	5.099	17.0294	0.2994
	5	5	17.0294	0.2936
	5	6.0828	17.1172	0.3237
	5	5	16.0312	0.3119
	5	6.0828	17.1172	0.3237
	5	5	17.0294	0.2936
	5	6.0828	17.1172	0.3237
	5	5	17.0294	0.2936
	6	5.099	17.1172	0.3242
	5	5	17.0294	0.2936
	5	6.0828	17.1172	0.3237
	5	5	17.0294	0.2936
	5	5	17.1172	0.2921
	5	5	16.0312	0.3119
	5	6	17.1172	0.3213
	5.099	5	16.0312	0.315
	6	6	17.1172	0.3505
	5.099	5	17.0294	0.2965
	6	6.0828	17.1172	0.3529
	5.099	5	16.0312	0.315
	6	6.0828	17.1172	0.3529
	5	5	17.0294	0.2936
	5	6.0828	17.1172	0.3237
	5	5	17.0294	0.2936
	6.0828	6.0828	17.1172	0.3554
	5	5	17.0294	0.2936
	5	6.0828	17.1172	0.3237
	5	5	17.0294	0.2936
	5	6.0828	17.1172	0.3237
	5	5	17.0294	0.2936
	6	5.099	17.1172	0.3242
	6	5.099	16.0312	0.3462
	6	5.099	17.1172	0.3242
	5	5	17.0294	0.2936
	5	5.099	17.1172	0.295
	5	5	17.0294	0.2936
	5	6	17.1172	0.3213
	5	5	16.0312	0.3119
	5	6	17.1172	0.3213
	5	5	17.0294	0.2936
	6	5	17.0294	0.323
	6	6	17.0294	0.3523
	6	5	17.1172	0.3213
	6	6	16	0.375
	6	5.099	17.0294	0.3259
	5	5	17.0294	0.2936
	6.0828	5.099	17.0294	0.3283
	5	5	17.0294	0.2936
	5.099	6.0828	16.1245	0.3467
	6	5	17.0294	0.323
	6	5.099	17.1172	0.3242
	5	5	17.0294	0.2936
	6.0828	6.0828	16.1245	0.3772
	5	5	17	0.2941
	5.099	5.099	16.0312	0.3181
	5	5	17	0.2941
	6.0828	6.0828	16.1245	0.3772
	5	5	17.0294	0.2936
	5.099	6.0828	17.1172	0.3266
	6	6	16	0.375
	6.0828	5.099	16.0312	0.3488
	5	5	17	0.2941
	5.099	6.0828	16.0312	0.3488
	5	5.099	16	0.3156
	5.099	6.0828	16.0312	0.3488
	5	5	16	0.3125
	6.0828	6	16.1245	0.3747
	5.099	5.099	16.0312	0.3181
	5.099	6.0828	16.0312	0.3488
	5	5.099	16.0312	0.315
	5.099	6.0828	16.1245	0.3467
	6	5	16	0.3438
	6	5	16.0312	0.3431
	5	5	16.0312	0.3119
	5.099	6	16.1245	0.3442
	5	5	16.0312	0.3119
	5.099	6	16.1245	0.3442
	5	5	16	0.3125
	5.099	6.0828	16.1245	0.3467
	5.099	5	16.0312	0.315
	5.099	6.0828	16.1245	0.3467
	5	5	16	0.3125
	5.099	6.0828	16.1245	0.3467
	5	5	17	0.2941
	6.0828	6	16.1245	0.3747
	5	5	16.0312	0.3119
	5	5	16.0312	0.3119
	5	5	17	0.2941
	5	6	16.1245	0.3411
	5	5	16.0312	0.3119
	5	6	17.1172	0.3213
	5	5	16	0.3125
	5	6	17.1172	0.3213
	5	5	16	0.3125
	5.099	6	16.1245	0.3442
	5	5	16.0312	0.3119
	5.099	6	16.1245	0.3442
	5	5	16	0.3125
	5.099	6.0828	17.1172	0.3266
	5	5	16.0312	0.3119
	6.0828	6.0828	16.1245	0.3772
	5	5	16.0312	0.3119
	6.0828	6.0828	17.1172	0.3554
	5	5	16	0.3125
	6.0828	6.0828	17.1172	0.3554
	5	5	16	0.3125
	5.099	6	16.1245	0.3442
	5.099	5	16.0312	0.315
	5.099	6	16.1245	0.3442
	5.099	5	16.0312	0.315
	5.099	6.0828	16.1245	0.3467
	5	5	16	0.3125
	6.0828	6.0828	16.1245	0.3772
	5	5	17.0294	0.2936
	6.0828	6.0828	17.1172	0.3554
	5	5.099	17	0.297
	6.0828	6	17.1172	0.3529
	5	6	17	0.3235
	6.0828	6	17.1172	0.3529
	5.099	5	17.0294	0.2965
	6.0828	6	17.2627	0.35
	5.099	5	16	0.3156
	6.0828	6	17.0294	0.3548
	5	6.0828	16	0.3463
	6.0828	6	16.1245	0.3747
	5.099	5	16	0.3156
	5.099	6	17.1172	0.3242
	5.099	6.0828	16	0.3494
	6.0828	6	16.1245	0.3747
	5	5	16.0312	0.3119
	6.0828	6.0828	16.1245	0.3772
	5	5	17	0.2941
	6.0828	6.0828	17.1172	0.3554
	5.099	5.099	16.0312	0.3181
	5.099	6	16.1245	0.3442
	5.099	5.099	16	0.3187
	6.0828	6	16.1245	0.3747
	5.099	5.099	16	0.3187
	6.0828	6.0828	16.1245	0.3772
	5.099	5.099	16.0312	0.3181
	5	6	17.0294	0.323
	5	4.1231	16	0.2851
	5	5	17.1172	0.2921
	3	2	17.0294	0.1468
	3	2	18.0278	0.1387
	3	2.2361	17	0.154
	3	3	17.0294	0.1762
	2	2	17	0.1176
	3	3	17.0294	0.1762
	2.2361	1	17	0.0952
	2	2	17.0294	0.1174
	4.1231	3	16	0.2226
	3	3.1623	16.1245	0.1911
	4	4	16	0.25
	5	4	16.1245	0.2791
	5	5	16	0.3125
	5	5.099	17.1172	0.295
	5	6	17	0.3235
	6.0828	6.0828	17.1172	0.3554
	5	6	16	0.3438
	5.099	6.0828	16.1245	0.3467
	5	6	16	0.3438
	5.099	6.0828	16.1245	0.3467
	5	5	17.0294	0.2936
	5.099	6.0828	17.1172	0.3266
	5	5	17.0294	0.2936
	5.099	6.0828	17.1172	0.3266
	5	5	17.0294	0.2936
	5.099	6.0828	16.0312	0.3488
	5	5	17.0294	0.2936
	5	6.0828	17.1172	0.3237
	5	5	17.0294	0.2936
	5.099	6.0828	17.1172	0.3266
	5	5.099	17.0294	0.2965
	5	6.0828	17.1172	0.3237
	5	5	17.0294	0.2936
	5	6.0828	17.0294	0.3254
	5	5	17.0294	0.2936
	5.099	5.099	17.1172	0.2979
	5	5	17.0294	0.2936
	6	6.0828	17.1172	0.3529
	5	5	17.0294	0.2936
	6.0828	6.0828	16.1245	0.3772
	5	5	17.0294	0.2936
	5.099	6.0828	17.1172	0.3266
	5	5	17.0294	0.2936
	6.0828	5.099	17.0294	0.3283
	5	5	17.0294	0.2936
	6	6.0828	17.1172	0.3529
	5	5	17.0294	0.2936
	6.0828	6.0828	17.0294	0.3572
	5	5	17.0294	0.2936
	5	6.0828	17.1172	0.3237
	5	5	17.0294	0.2936
	6	6.0828	17.1172	0.3529
	6	5	17.0294	0.323
	6	6	17.1172	0.3505
	5	5	16.0312	0.3119
	6	5.099	17.1172	0.3242
	6	5	17.0294	0.323
	6.0828	6.0828	16.1245	0.3772
	6	5	17.0294	0.323
	6.0828	5.099	16.2788	0.3434
	5	5	17.0294	0.2936
	6.0828	5.099	16.1245	0.3467
	5	5	17.0294	0.2936
	6	5.099	17.2627	0.3215
	5	5.099	16.0312	0.315
	6	5	17.1172	0.3213
	6	5.099	17	0.3264
	6.0828	5.099	17.0294	0.3283
	6	6	17	0.3529
	6.0828	7	17.0294	0.3841
	6	5	16.0312	0.3431
	6.0828	5.099	17.0294	0.3283
	6	6	16	0.375
	6.0828	7	17.1172	0.3822
	6	6	17	0.3529
	6.0828	6	17.1172	0.3529
	5	6	17	0.3235
	6	6	17.1172	0.3505
	5	6	17	0.3235
	6	6.0828	16.1245	0.3747
	5	6	16	0.3438
	6	6.0828	16.1245	0.3747
	6	6	17	0.3529
	6	6.0828	17.0294	0.3548
	6	6	17	0.3529
	6	6.0828	16.0312	0.3769
	6	6	17	0.3529
	6	6.0828	16.1245	0.3747
	6	5	17	0.3235
	7	6.0828	16.1245	0.4057
	6	5	17	0.3235
	7	6.0828	17.1172	0.3822
	6	6	17.0294	0.3523
	7	6.0828	17.1172	0.3822
	6	5	17	0.3235
	7	6	17.1172	0.3797
	6.0828	5	17.0294	0.3254
	7	6	17.1172	0.3797
	6	6.0828	17.0294	0.3548
	7.0711	6.0828	17.1172	0.3842
	6	6	17.0294	0.3523
	7.0711	6.0828	17.1172	0.3842
	6	6	17	0.3529
	7	7.0711	17.0294	0.4131
	6.0828	6	17	0.3554
	7	6	16.1245	0.4031
	6	6	17.0294	0.3523
	7	6	17.0294	0.3817
	6	6	17.0294	0.3523
	7.0711	7.0711	17.0294	0.4152
	5	6.0828	16	0.3463
	6.0828	6.0828	17.0294	0.3572
	6	6	17	0.3529
	6	7.0711	17.0294	0.3838
	6.0828	6	17	0.3554
	6	6.0828	17.0294	0.3548
	7	6	17	0.3824
	7	7.0711	17.0294	0.4131
	6.0828	6	17	0.3554
	6	7.0711	16.0312	0.4077
	6.0828	5	17.0294	0.3254
	6	7.0711	17.0294	0.3838
	6	6	17	0.3529
	6	6.0828	17.0294	0.3548
	5.099	6	17.0294	0.3259
	6	7.0711	16.0312	0.4077
	6	6	17.0294	0.3523
	6	6.0828	16.0312	0.3769
	5	5	17	0.2941
	6	6	16.0312	0.3743
	6	6	18.0278	0.3328
	6	6	16.0312	0.3743
	6	6	18.0278	0.3328
	6	6	16.0312	0.3743
	6	6	18.0278	0.3328
	6	6	16.0312	0.3743
	6	6	18	0.3333
	6	6.0828	17.0294	0.3548
	6.0828	6	17	0.3554
	6	6	17.0294	0.3523
	6.0828	6	17.0294	0.3548
	6	6	16.0312	0.3743
	6.0828	6	17.0294	0.3548
	6	6	16.0312	0.3743
	6.0828	6	17	0.3554
	6	6	16.1245	0.3721
	6	6.0828	17	0.3554
	6	6	16.0312	0.3743
	6	6	17	0.3529
	7	6	16.0312	0.4055
	6	6	17	0.3529
	6	6	16.0312	0.3743
	6	6.0828	17	0.3554
	6	6	16.0312	0.3743
	6	6	17	0.3529
	6	6	16.0312	0.3743
	6.0828	6	17	0.3554
	6	6	16.0312	0.3743
	6	6	17	0.3529
	6	6	16.0312	0.3743
	6.0828	6	17.0294	0.3548
	6	6	16.0312	0.3743
	6.0828	5	17.0294	0.3254
	6	6	16.0312	0.3743
	6.0828	6	17	0.3554
	6	6	16.0312	0.3743
	6.0828	5	17.0294	0.3254
	6	6	16.0312	0.3743
	6.0828	5	17.0294	0.3254
	6.0828	6	17.0294	0.3548
	6.0828	5	17.0294	0.3254
	6	6	16.0312	0.3743
	6.0828	6	17.0294	0.3548
	6.0828	6.0828	16.0312	0.3794
	6	6	18.0278	0.3328
	6.0828	6.0828	17.0294	0.3572
	6.0828	6	17.0294	0.3548
	6	6	17.0294	0.3523
	6.0828	6	18	0.3356
	6	6.0828	17.0294	0.3548
	6.0828	6	17.0294	0.3548
	6	6.0828	17.0294	0.3548
	6	6	17.0294	0.3523
	6	6	16.0312	0.3743
	6	5	17.0294	0.323
	6	6.0828	17.0294	0.3548
	5	5	17.0294	0.2936
	5.099	5.099	17.0294	0.2994
	3	2	17	0.1471
	3	3	16.0312	0.1871
	3.1623	2	18.0278	0.1432
	3	3	17	0.1765
	2	2	17.0294	0.1174
	2	2	16	0.125
	2	2	17.0294	0.1174
	2	2	16.0312	0.1248
	3.1623	3	18.0278	0.1709
	3	3	17	0.1765
	3.1623	2	18.0278	0.1432
	2	2	17.0294	0.1174
	3	3	18	0.1667
	3	3.1623	17	0.1812
	4	4	17	0.2353
	4	5	16.0312	0.2807
	6.0828	5	17	0.326
	6.0828	6	16.0312	0.3769
	5	5	17.0294	0.2936
	6.0828	5.099	16.0312	0.3488
	6.0828	5	17.0294	0.3254
	6	6.0828	16.0312	0.3769
	6.0828	5	17.0294	0.3254
	6	6.0828	16.0312	0.3769
	6.0828	5	17.0294	0.3254
	6.0828	6.0828	17.0294	0.3572
	6.0828	5	17.0294	0.3254
	6.0828	6.0828	16.0312	0.3794
	6.0828	6	17.0294	0.3548
	6	6.0828	17.0294	0.3548
	6.0828	5	17.0294	0.3254
	6.0828	6.0828	17.0294	0.3572
	6.0828	5	17.0294	0.3254
	6.0828	6.0828	17.0294	0.3572
	6	6	17.0294	0.3523
	6.0828	6.0828	17.0294	0.3572
	6	5	17.0294	0.323
	6.0828	6.0828	17.0294	0.3572
	6	5	17.0294	0.323
	6.0828	6.0828	17.0294	0.3572
	6.0828	5	17.0294	0.3254
	6	6	16.0312	0.3743
	6	5	16.0312	0.3431
	6	6	16.0312	0.3743
	6.0828	5	17.0294	0.3254
	6.0828	6	16.0312	0.3769
	6.0828	5	17	0.326
	6.0828	7	16.0312	0.408
	6.0828	5	17.0294	0.3254
	6.0828	6.0828	17.0294	0.3572
	7	6	16	0.4062
	7	7	16.0312	0.4366
	5	5.099	17.0294	0.2965
	6.0828	6	17.1172	0.3529
	6.0828	5	17.0294	0.3254
	5.099	5	16.0312	0.315
	6	5	17.0294	0.323
	5.099	6	16.0312	0.3462
	5.099	5	17	0.297
	6	5	16.1245	0.3411
	5	5	17	0.2941
	6	5	17.1172	0.3213
	5	5	17.0294	0.2936
	6	5	17.1172	0.3213
	5	5	17	0.2941
	5	5	16.1245	0.3101
	4	5	17	0.2647
	5	5	16.1245	0.3101
	5	4	17.0294	0.2642
	5.099	5	16.1245	0.3132
	5.099	5	17.0294	0.2965
	5.099	5.099	17.1172	0.2979
	5	5	17.0294	0.2936
	5	5	17.1172	0.2921
	5	5	17.0294	0.2936
	5	5	17.1172	0.2921
	5	5.099	17.0294	0.2965
	5	5	16.1245	0.3101
	5	5.099	17.0294	0.2965
	5	5	17.0294	0.2936
	5	5.099	17.0294	0.2965
	5	5	16.1245	0.3101
	5.099	5	17.0294	0.2965
	6	6	17.1172	0.3505
	5	5	17.0294	0.2936
	5	6	16.1245	0.3411
	5	5	17.0294	0.2936
	6	6.0828	16.1245	0.3747
	6.0828	5	17.0294	0.3254
	6	6	17.1172	0.3505
	5.099	5	17.0294	0.2965
	6	6	17.1172	0.3505
	5	5	17.0294	0.2936
	6	6	17.1172	0.3505
	5	5	17.0294	0.2936
	6	6	17.1172	0.3505
	5.099	5	17.0294	0.2965
	6	6	17.1172	0.3505
	5	5	17.0294	0.2936
	6	5	17.1172	0.3213
	6	5.099	17.0294	0.3259
	6	6	17.1172	0.3505
	5.099	5	17.0294	0.2965
	6	6	16.1245	0.3721
	5	5.099	17.0294	0.2965
	6	6.0828	16.1245	0.3747
	6	5.099	17.0294	0.3259
	5.099	6	17.1172	0.3242
	4	4	17.0294	0.2349
	5	4.1231	17.1172	0.2665
	2	2	17	0.1176
	2	2	16.0312	0.1248
	3	2	18	0.1389
	3	3	17	0.1765
	2	1	17	0.0882
	2	2	17	0.1176
	3	3	17	0.1765
	4	4	17.0294	0.2349
	4	4	17.0294	0.2349
	5	4.1231	17.0294	0.2679
	5	4	17.0294	0.2642
	5	5	17.1172	0.2921
	5	5.099	17.0294	0.2965
	6	6	16.1245	0.3721
	5	5.099	17.0294	0.2965
	6	6	16.1245	0.3721
	5	5	17.0294	0.2936
	6	5	16.1245	0.3411
	5	5.099	17.0294	0.2965
	6	6	16.1245	0.3721
	5	5.099	18.0278	0.2801
	6	6	16.1245	0.3721
	5	5	18	0.2778
	6	6	16.1245	0.3721
	5	5	17	0.2941
	5	6	17.1172	0.3213
	5	5.099	17.0294	0.2965
	6.0828	6.0828	17.1172	0.3554
	5	5	17.0294	0.2936
	5	6	17.1172	0.3213
	6	5	17.0294	0.323
	6.0828	6	17.1172	0.3529
	5	5.099	17.0294	0.2965
	6	6	17.1172	0.3505
	5.099	5	17.0294	0.2965
	6	6	17.1172	0.3505
	5.099	5	17.0294	0.2965
	6	6	16.1245	0.3721
	5.099	5	17.0294	0.2965
	6	6	16.1245	0.3721
	5	5	17.0294	0.2936
	6.0828	6.0828	16.1245	0.3772
	5	5	16.0312	0.3119
	6	6	17.1172	0.3505
	5	5	17	0.2941
	6	6	17.0294	0.3523
	6	5	17.0294	0.323
	6.0828	6.0828	17.1172	0.3554
	5	5	17	0.2941
	6.0828	6.0828	17.1172	0.3554
	5	5	17.0294	0.2936
	6	6.0828	16.1245	0.3747
	5	5	17.0294	0.2936
	6	6.0828	16.1245	0.3747
	5	5	17	0.2941
	6.0828	6.0828	17.1172	0.3554
	5	5	17	0.2941
	6	6	16.1245	0.3721
	5	5	17.0294	0.2936
	6	6.0828	16.1245	0.3747
	5	5	17.0294	0.2936
	6.0828	6.0828	16.1245	0.3772
	5	5	17.0294	0.2936
	6.0828	6.0828	17.0294	0.3572
	5	5	16.0312	0.3119
	6.0828	6	17.1172	0.3529
	5	5	16.0312	0.3119
	6.0828	6.0828	17.1172	0.3554
	5	5	17.0294	0.2936
	6	6	17.1172	0.3505
	6	5	17.0294	0.323
	6	6	17.1172	0.3505
	5	5	16.0312	0.3119
	6	6	16.1245	0.3721
	5.099	5	17.0294	0.2965
	6	6	16.1245	0.3721
	6	5	17	0.3235
	6	6	16.1245	0.3721
	5	5	17.0294	0.2936
	6	6	17.1172	0.3505
	5.099	5	17.0294	0.2965
	6	6.0828	16.1245	0.3747
	5	5	17.0294	0.2936
	6	6	17.1172	0.3505
	5.099	5	17.0294	0.2965
	6.0828	6.0828	16.1245	0.3772
	5	5	17.0294	0.2936
	6	6.0828	17.1172	0.3529
	5	5	17.0294	0.2936
	6.0828	6.0828	16.1245	0.3772
	5	6	17	0.3235
	6	6.0828	16.1245	0.3747
	5	6	17	0.3235
	6	6.0828	16.1245	0.3747
	5	5	17.0294	0.2936
	6.0828	6.0828	16.1245	0.3772
	5	6	17	0.3235
	6.0828	6.0828	16.1245	0.3772
	6	6	17	0.3529
	6	6	16.1245	0.3721
	5	5	17.0294	0.2936
	6	6.0828	16.1245	0.3747
	5	6	17.0294	0.323
	6	6	17.1172	0.3505
	5	5	17.0294	0.2936
	6	6	17.1172	0.3505
	5	5	17	0.2941
	6.0828	6.0828	16.1245	0.3772
	5	5	17.0294	0.2936
	6	5	17.1172	0.3213
	5	5	17.0294	0.2936
	6	6	17.1172	0.3505
	5.099	5	17.0294	0.2965
	6	6	17.1172	0.3505
	5	5	17	0.2941
	6	6	16.1245	0.3721
	5	5	17.0294	0.2936
	6	6	17.1172	0.3505
	5	5	17.0294	0.2936
	6.0828	6.0828	16.1245	0.3772
	5	6	17.0294	0.323
	6.0828	6.0828	16.1245	0.3772
	5	5	17.0294	0.2936
	6.0828	5.099	16.1245	0.3467
	3	3	17	0.1765
	3.1623	2	17.0294	0.1516
	3	3	18	0.1667
	3.1623	3	17.0294	0.1809
	2	3	18	0.1389
	3	3	17.0294	0.1762
	3.1623	2	18	0.1434
	3	3	18.0278	0.1664
	2	1	18.0278	0.0832
	2	2	17.0294	0.1174
	3	3	18	0.1667
	3	2	17.0294	0.1468
	4	3	17	0.2059
	3	4	17.0294	0.2055
	5	5	17	0.2941
	5.099	4	17.0294	0.2672
	5	5	17	0.2941
	5	5.099	17.1172	0.295
	5	6	17	0.3235
	6	5.099	17.1172	0.3242
	5	5	17	0.2941
	5	5	16.1245	0.3101
	5	5	17.0294	0.2936
	6	6.0828	17.1172	0.3529
	5	5	17.0294	0.2936
	6	5	17.1172	0.3213
	5.099	5	17.0294	0.2965
	6.0828	5.099	16.1245	0.3467
	5	5	17.0294	0.2936
	5.099	6.0828	16.1245	0.3467
	5	5	17	0.2941
	5	6	17.1172	0.3213
	5	5	17.0294	0.2936
	5.099	6.0828	16.1245	0.3467
	5	5	17.0294	0.2936
	6.0828	6.0828	16.1245	0.3772
	5	5	17.0294	0.2936
	6.0828	6.0828	16.1245	0.3772
	5	5	17.0294	0.2936
	6.0828	6.0828	16.1245	0.3772
	5	5	17.0294	0.2936
	6	6	17.1172	0.3505
	5	5	17.0294	0.2936
	6	6	17.1172	0.3505
	5.099	5.099	17.0294	0.2994
	6	6	17.1172	0.3505
	5	5.099	17.0294	0.2965
	6	6	17.1172	0.3505
	5.099	5	17.0294	0.2965
	5	6	17.1172	0.3213
	5	5.099	17.0294	0.2965
	6	6	17.1172	0.3505
	5.099	5	17.0294	0.2965
	5.099	6.0828	17.1172	0.3266
	5.099	5	17.0294	0.2965
	5	6	17.1172	0.3213
	5	5	17.0294	0.2936
	6.0828	6	17.1172	0.3529
	5	5	17.0294	0.2936
	5	6	17.1172	0.3213
	5.099	5	17.0294	0.2965
	5	6	17.1172	0.3213
	5.099	5	17	0.297
	6	6	17.1172	0.3505
	5	5	16.0312	0.3119
	5	6	16.1245	0.3411
	5	5	16	0.3125
	5	6	16.0312	0.3431
	5	5	16.0312	0.3119
	5	6	17.1172	0.3213
	5	5	16	0.3125
	5	5	16.0312	0.3119
	5	5	17	0.2941
	5	5	17.0294	0.2936
	5	5	16	0.3125
	5	6	17.1172	0.3213
	5	5.099	17.0294	0.2965
	6.0828	6	17.1172	0.3529
	5	5.099	17.0294	0.2965
	6.0828	6	17.1172	0.3529
	5.099	5.099	17.0294	0.2994
	5	6	17.1172	0.3213
	5.099	5.099	17	0.2999
	5	6	17.1172	0.3213
	5.099	5	17.0294	0.2965
	6	6	17.1172	0.3505
	5.099	5	17.0294	0.2965
	5	6	16.1245	0.3411
	5.099	5	17.0294	0.2965
	6	6	16.1245	0.3721
	5	5.099	17.0294	0.2965
	5	6	16.1245	0.3411
	5	5.099	17	0.297
	5	6	17.1172	0.3213
	5	5.099	17.0294	0.2965
	6.0828	6	17.1172	0.3529
	5	5	16.0312	0.3119
	6	6	17.1172	0.3505
	5	5.099	17.0294	0.2965
	6	6	17.1172	0.3505
	5	5.099	17.0294	0.2965
	6.0828	6	17.1172	0.3529
	5	5.099	17.0294	0.2965
	6	6.0828	16.1245	0.3747
	5	5.099	17.0294	0.2965
	6	6	17.1172	0.3505
	6	5	17.0294	0.323
	6	6	17.1172	0.3505
	5	5	17.0294	0.2936
	6	6	17.1172	0.3505
	5	5	16.0312	0.3119
	6	6	17.1172	0.3505
	5	5	17.0294	0.2936
	6.0828	6.0828	17.1172	0.3554
	6	5	17.0294	0.323
	6.0828	6	17.1172	0.3529
	5	5	16	0.3125
	6.0828	6	17.1172	0.3529
	5	5	16.0312	0.3119
	6	6	17.1172	0.3505
	5	5.099	17	0.297
	6	5	17.1172	0.3213
	6	5	17	0.3235
	5	5	17.1172	0.2921
	6	5	17	0.3235
	5	5	17.1172	0.2921
	5	5.099	17	0.297
	5	5	17.1172	0.2921
	5.099	5.099	17	0.2999
	5	6	16.1245	0.3411
	5	5.099	17.0294	0.2965
	5	6	17.1172	0.3213
	5	5	17	0.2941
	5	6	17.1172	0.3213
	5	5	17	0.2941
	5.099	6.0828	16.1245	0.3467
	5	5	17.0294	0.2936
	5.099	6	17.1172	0.3242
	5	6	18.0278	0.3051
	5.099	6	17.1172	0.3242
	4	3	18	0.1944
	4	4.1231	17.1172	0.2373
	3	2	17	0.1471
[truncated: 8,167 more rows]

## Sheet: eyeblink8-10
	A	B	C	D
	6	6.0828	21.0238	0.2874
	5	5	21.0238	0.2378
	6	7	19.0263	0.3416
	7.2801	7.0711	21.587	0.3324
	5	5	21	0.2381
	5.099	5.099	22.561	0.226
	6	5	20	0.275
	5.3852	6.0828	21.3776	0.2682
	6	6	21.0238	0.2854
	5.3852	6.0828	21.3776	0.2682
	6	5	20.025	0.2747
	5.099	6.0828	21.3776	0.2615
	4	4	20	0.2
	4.1231	4	21.2132	0.1915
	2.2361	3.1623	21	0.1285
	3.1623	2	20.2237	0.1276
	2	3	22	0.1136
	3.1623	2	21.2132	0.1217
	2	3	21	0.119
	2.2361	2.2361	20.3961	0.1096
	3	3	21	0.1429
	3.1623	3	20.2237	0.1524
	4	3	20	0.175
	4.1231	4	20.2237	0.2008
	4	4	20	0.2
	4.4721	4	21.2132	0.1997
	5	5	21	0.2381
	5.099	5.099	20.2237	0.2521
	5	5	20.025	0.2497
	5.099	5	21.3776	0.2362
	5	5	20	0.25
	6.0828	5.099	21.2132	0.2636
	5	6	20.025	0.2747
	6.0828	5.099	20.2237	0.2765
	5.099	4.1231	20.025	0.2303
	5.099	5.099	20.3961	0.25
	5	4	20.025	0.2247
	5.3852	5	20.6155	0.2519
	5	5.099	20	0.2525
	6.0828	5.099	20.3961	0.2741
	5	5	20	0.25
	5.099	5.099	20.3961	0.25
	5.099	5	20.025	0.2522
	5.3852	5	20.3961	0.2546
	5	5	20.025	0.2497
	5.099	5	21.3776	0.2362
	5	5.099	21	0.2405
	5.099	5.099	20.2237	0.2521
	5	5	20.025	0.2497
	6.3246	6.0828	21.3776	0.2902
	5	5.099	21	0.2405
	5.099	5.099	20.3961	0.25
	5.099	5	20	0.2525
	6.0828	5	20.3961	0.2717
	5.099	5.099	21	0.2428
	5.099	4	20.2237	0.225
	6	5.099	21.0238	0.264
	5.099	5	21.3776	0.2362
	5	5	21	0.2381
	5.099	5.099	21.3776	0.2385
	5	5	21	0.2381
	5.099	5	21.3776	0.2362
	5.099	4.1231	20	0.2306
	5.099	4	21.3776	0.2128
	5	4	21	0.2143
	5.099	4.1231	21.2132	0.2174
	5	4	20	0.225
	5.099	4.1231	20.3961	0.2261
	5	4	20	0.225
	5.099	5.099	20.3961	0.25
	5	5	20.025	0.2497
	5.099	6.0828	21.3776	0.2615
	5	5	20	0.25
	5.099	5	21.3776	0.2362
	5	4	21	0.2143
	5.3852	4	21.3776	0.2195
	5	4	20	0.225
	5.3852	5.099	21.2132	0.2471
	5	5.099	21	0.2405
	6.0828	5.099	21.2132	0.2636
	5	5	20	0.25
	5.099	5.099	20.3961	0.25
	5	4	20	0.225
	5.099	5.099	20.3961	0.25
	5	4	20	0.225
	5.099	4.1231	20.2237	0.228
	5	5	20	0.25
	5.099	4.1231	20.2237	0.228
	4	4	21	0.1905
	4.1231	4.1231	20.2237	0.2039
	5	5	20	0.25
	5.099	4.1231	20.2237	0.228
	5	5	21	0.2381
	5.099	4.1231	20.3961	0.2261
	5	5	21	0.2381
	5.099	5.099	20.3961	0.25
	4	5.099	21	0.2166
	5.099	4.1231	20.2237	0.228
	4	4	20	0.2
	5.099	4.1231	21.2132	0.2174
	4	5	20	0.225
	5.3852	4	21.2132	0.2212
	5	5	21	0.2381
	5.099	5.099	21.3776	0.2385
	6	5	20.025	0.2747
	5.099	5.099	21.3776	0.2385
	5	4	20.025	0.2247
	5.099	4.1231	20.2237	0.228
	6	5	20.025	0.2747
	5.099	4.1231	21.3776	0.2157
	5	4	20	0.225
	5.099	5.099	21.3776	0.2385
	5	5	20	0.25
	5.099	4.1231	21.3776	0.2157
	5	4	20	0.225
	5.099	5.099	20.3961	0.25
	4.1231	4.1231	20	0.2062
	5.099	5.099	20.3961	0.25
	5	4	20	0.225
	4.1231	5.099	21.3776	0.2157
	5	4	20	0.225
	5.099	5.099	21.3776	0.2385
	4	4	20	0.2
	4.1231	4.1231	20.3961	0.2022
	4	4	20	0.2
	4.1231	4.1231	21.3776	0.1929
	5	5	20	0.25
	4.1231	5.099	20.3961	0.2261
	5.099	5.099	21	0.2428
	4.1231	5.099	21.3776	0.2157
	5	4	21	0.2143
	5.099	5.099	21.3776	0.2385
	5.099	4	20	0.2275
	5.099	5.099	21.3776	0.2385
	5	4	21	0.2143
	5.3852	5.099	21.3776	0.2452
	5	4	21	0.2143
	5.099	5.099	21.3776	0.2385
	5	4	21	0.2143
	5.099	5.099	20.3961	0.25
	5	4.1231	21	0.2172
	5.099	5.099	21.3776	0.2385
	5	4	21	0.2143
	4.1231	5.099	20.3961	0.2261
	5	5	21	0.2381
	5.099	5	21.3776	0.2362
	5	5	21	0.2381
	5.3852	5.099	21.3776	0.2452
	5	4	21	0.2143
	5.3852	5.099	21.3776	0.2452
	5	5.099	21	0.2405
	5.3852	5.099	21.3776	0.2452
	5	5	20	0.25
	5.099	5.099	20.2237	0.2521
	4	4	20	0.2
	4.1231	4.1231	20.3961	0.2022
	5	5	20	0.25
	5.099	5.099	20.3961	0.25
	5	5	20	0.25
	5.099	5.099	20.2237	0.2521
	5	4	20.025	0.2247
	4.1231	5.099	20.3961	0.2261
	5	4	20	0.225
	4.1231	4.1231	21.3776	0.1929
	5	4	20	0.225
	5.099	5.099	21.3776	0.2385
	4	5	20.025	0.2247
	5.099	5.099	20.3961	0.25
	5	4	21	0.2143
	5.099	5.099	22.3607	0.228
	5.099	4	21	0.2166
	5.099	5.099	21.3776	0.2385
	5	5	21.0238	0.2378
	5.099	5	21.3776	0.2362
	5	4	20	0.225
	5.099	5.099	20.3961	0.25
	5	5	20.025	0.2497
	5.099	4.4721	21.3776	0.2239
	5	5	20.025	0.2497
	5.099	5.3852	21.3776	0.2452
	5	5	20	0.25
	5.099	5.099	20.6155	0.2473
	5	5	20	0.25
	5.099	5.099	21.3776	0.2385
	5	6	20.025	0.2747
	5.099	5.099	20.3961	0.25
	5	5	20.025	0.2497
	5.099	4.1231	21.3776	0.2157
	5	5	20	0.25
	6.0828	5.099	21.3776	0.2615
	6	5	21.0238	0.2616
	5.099	5.099	21.3776	0.2385
	5	5	20	0.25
	6.0828	6.0828	20.3961	0.2982
	6	6	21.0238	0.2854
	6.0828	6.3246	21.3776	0.2902
	5	5	20.025	0.2497
	6.0828	5.099	20.3961	0.2741
	6	5.099	21.0238	0.264
	5.099	5.099	21.3776	0.2385
	5	5	20	0.25
	5.099	5.3852	20.6155	0.2543
	5	5.099	20.0998	0.2512
	6.0828	5.099	21.587	0.259
	6	6	21.0238	0.2854
	5.3852	6.0828	21.3776	0.2682
	6	5	20.025	0.2747
	5.099	6.0828	20.3961	0.2741
	6.0828	6	21.0238	0.2874
	6.0828	6.0828	21.3776	0.2845
	5	5.099	20	0.2525
	5.099	5.099	20.3961	0.25
	6	5	21	0.2619
	5.099	5.099	21.3776	0.2385
	5	5	21	0.2381
	6.0828	5.099	21.3776	0.2615
	5	5	21	0.2381
	6.0828	5.099	21.3776	0.2615
	5	5	20.025	0.2497
	5.099	6.0828	21.3776	0.2615
	5	5	22.0227	0.227
	5.3852	5.099	21.3776	0.2452
	6	5	21.0238	0.2616
	5.099	5.099	21.3776	0.2385
	6	5	21.0238	0.2616
	5.3852	5.099	22.3607	0.2344
	5	5	21	0.2381
	5.099	5.099	21.3776	0.2385
	5	5	21.0238	0.2378
	5.099	5.099	21.3776	0.2385
	5	5	21.0238	0.2378
	5.3852	5.099	22.3607	0.2344
	5	5	21.0238	0.2378
	5.099	5	22.3607	0.2258
	6	5	21.0238	0.2616
	5.099	5.099	21.3776	0.2385
	5	5	22.0227	0.227
	5.099	5.099	21.3776	0.2385
	6	5	22.0227	0.2497
	5.099	5.099	21.3776	0.2385
	5	5	21	0.2381
	5.099	5.099	21.3776	0.2385
	5	5	21.0238	0.2378
	5.099	5.099	21.3776	0.2385
	5	5	21	0.2381
	5.099	5.099	22.3607	0.228
	5	4.1231	21.0238	0.217
	5.099	5.099	22.3607	0.228
	5	5.099	21.0238	0.2402
	5.099	5.099	21.3776	0.2385
	5.099	5	21	0.2405
	5.099	5.099	22.3607	0.228
	5	5	21	0.2381
	5.3852	5.099	20.3961	0.257
	5	5.099	21	0.2405
	6.0828	6.0828	21.3776	0.2845
	5	5	22.0227	0.227
	6.0828	5.099	21.3776	0.2615
	5	4	21	0.2143
	5.099	5.099	22.3607	0.228
	5	5	21.0238	0.2378
	5.099	5.099	21.3776	0.2385
	5	5	21.0238	0.2378
	5.099	5.099	21.3776	0.2385
	5	4	20.025	0.2247
	5.099	5.099	21.3776	0.2385
	5	5	20.025	0.2497
	5.099	5.099	21.3776	0.2385
	5	5	20.025	0.2497
	5.099	5.099	20.3961	0.25
	5	5	21.0238	0.2378
	5.099	5.099	20.3961	0.25
	6	5	20.025	0.2747
	5.099	5.099	20.3961	0.25
	5	4	21.0238	0.214
	5.099	4.1231	21.3776	0.2157
	5	4	20	0.225
	5.099	5.099	21.2132	0.2404
	5	5	21	0.2381
	6.0828	5.099	21.3776	0.2615
	5	4	21	0.2143
	5.099	4.1231	21.2132	0.2174
	3.1623	2.2361	22	0.1227
	2.2361	3.1623	22.2036	0.1216
	3	2	22	0.1136
	2.2361	2.2361	22.0907	0.1012
	2	2	22.0227	0.0908
	2	2	21.2132	0.0943
	3	2	22	0.1136
	3.1623	3.1623	22.2036	0.1424
	3.1623	2	21	0.1229
	3.1623	3.1623	22.2036	0.1424
	4	3	22.0227	0.1589
	4	4	21.3776	0.1871
	5	5	20	0.25
	5.099	4.1231	21.2132	0.2174
	5	4	20	0.225
	5.3852	4.1231	20.3961	0.2331
	4	4	20	0.2
	4.1231	4.1231	20.3961	0.2022
	5	4	22	0.2045
	5.099	4.1231	21.3776	0.2157
	5	5	20	0.25
	5.099	5.099	21.2132	0.2404
	5	4	20	0.225
	6.0828	4	21.3776	0.2358
	4	4	21	0.1905
	5.099	4	21.3776	0.2128
	5	5	21.0238	0.2378
	6.0828	5	21.3776	0.2592
	5	5	21.0238	0.2378
	5.099	4	21.3776	0.2128
	5	5	21.0238	0.2378
	5.099	5	21.3776	0.2362
	5	5	20	0.25
	5.099	5	21.3776	0.2362
	5	5	20.025	0.2497
	5.099	5	21.3776	0.2362
	4	5	20.025	0.2247
	5.099	5.099	20.3961	0.25
	5	5	20.025	0.2497
	5.099	5.099	21.3776	0.2385
	5	4	21	0.2143
	4.1231	5.099	21.3776	0.2157
	5	5	21.0238	0.2378
	5.099	5.099	20.2237	0.2521
	5	4	20	0.225
	5.099	5.099	20.3961	0.25
	5	4	20	0.225
	4.1231	4.1231	20.2237	0.2039
	5	4	20	0.225
	4.1231	5.099	20.2237	0.228
	4	4	21	0.1905
	4.1231	4.1231	21.2132	0.1944
	5	4	20	0.225
	4.1231	4.1231	20.2237	0.2039
	5	4	21	0.2143
	4.1231	5.099	21.2132	0.2174
	4	5	21	0.2143
	4.1231	4.1231	21.2132	0.1944
	5	4	20	0.225
	4.1231	4.1231	20.2237	0.2039
	5	4	20	0.225
	5.099	4.1231	20.2237	0.228
	4	5	20.025	0.2247
	4.1231	4.1231	20.2237	0.2039
	5	5	20	0.25
	5.099	4.1231	20.3961	0.2261
	5	5	21	0.2381
	5.099	4.1231	20.2237	0.228
	4	5	20	0.225
	5.099	4.1231	20.2237	0.228
	6	5	20.025	0.2747
	5.099	5.099	20.3961	0.25
	5	5	21.0238	0.2378
	5.3852	4.1231	21.3776	0.2224
	5	5	20	0.25
	5.3852	5.099	20.3961	0.257
	5	5	20.025	0.2497
	5.099	5.099	20.3961	0.25
	6	5	20.025	0.2747
	5.099	5.099	20.3961	0.25
	5	5	20.025	0.2497
	5.099	5.099	20.3961	0.25
	5	5	20.025	0.2497
	5.3852	5.099	21.3776	0.2452
	6.0828	5	21.0238	0.2636
	5.099	5.099	21.3776	0.2385
	5	5	20.025	0.2497
	5.3852	5.099	21.3776	0.2452
	5	5	20.025	0.2497
	5.099	5.099	21.3776	0.2385
	5	6	21.0238	0.2616
	6.0828	6.0828	21.3776	0.2845
	6	5	20.025	0.2747
	6.0828	6.0828	21.3776	0.2845
	5	5	21.0238	0.2378
	6.0828	6.0828	21.3776	0.2845
	5	5	20	0.25
	6.0828	5.099	21.3776	0.2615
	5	6	21	0.2619
	6.0828	5.099	21.3776	0.2615
	5	4.1231	21.0238	0.217
	6.0828	6.0828	21.3776	0.2845
	5	6	21	0.2619
	6.0828	6.0828	21.3776	0.2845
	5	5	21	0.2381
	6.0828	6.0828	21.3776	0.2845
	5	5	20.025	0.2497
	5.099	5.099	21.3776	0.2385
	6	6	21.0238	0.2854
	6.3246	6.0828	21.3776	0.2902
	6	6	21.0238	0.2854
	6.0828	6.0828	21.3776	0.2845
	5	5	20.025	0.2497
	6.3246	6.0828	20.3961	0.3042
	5	5	20.025	0.2497
	6.0828	6.0828	21.3776	0.2845
	5.099	6	20.025	0.2771
	5.099	5.099	21.3776	0.2385
	5	5.099	21.0238	0.2402
	5.099	5.099	21.3776	0.2385
	5	4.1231	21.0238	0.217
	4.1231	4.1231	20.2237	0.2039
	5	4	20	0.225
	5.099	4.1231	20.2237	0.228
	5	4.1231	21.0238	0.217
	5.099	4.1231	21.2132	0.2174
	5	4	21.0238	0.214
	5.099	4	21.3776	0.2128
	5	4	21.0238	0.214
	5.099	4	21.3776	0.2128
	5	4	21	0.2143
	5.099	5	21.3776	0.2362
	5	4	21	0.2143
	5.099	5.099	21.3776	0.2385
	5	4	21.0238	0.214
	5.099	5.099	21.3776	0.2385
	5.099	4	21.0238	0.2164
	5.099	5	21.3776	0.2362
	5	4	21	0.2143
	5.099	5.099	21.3776	0.2385
	4	4	20.025	0.1998
	4.1231	5.099	21.3776	0.2157
	4	4	21	0.1905
	4.1231	5.099	21.3776	0.2157
	5	4	21.0238	0.214
	5.099	4.1231	21.3776	0.2157
	5	4	21	0.2143
	5.099	4.1231	21.2132	0.2174
	6	5	21.0238	0.2616
	6.0828	6.0828	21.3776	0.2845
	6	5	21.0238	0.2616
	5.099	5.099	21.2132	0.2404
	6	5.099	21.0238	0.264
	5.099	5	21.2132	0.238
	6	5	21.0238	0.2616
	6.0828	5.099	21.2132	0.2636
	5	5	21.0238	0.2378
	5.099	5.099	20.2237	0.2521
	6	6	21.0238	0.2854
	5.3852	5.099	21.3776	0.2452
	6	6	21.0238	0.2854
	5.099	5.099	21.3776	0.2385
	6.0828	6	21.0238	0.2874
	5.099	6.0828	21.3776	0.2615
	6	6	21.0238	0.2854
	5.3852	5.099	21.3776	0.2452
	5	6	21.0238	0.2616
	5.3852	6.0828	21.3776	0.2682
	5	6	21.0238	0.2616
	5.099	6.0828	21.3776	0.2615
	6.0828	6	21.0238	0.2874
	5.099	5.099	21.3776	0.2385
	5	6	21.0238	0.2616
	6.0828	6.0828	21.3776	0.2845
	6.0828	6	21.0238	0.2874
	5.099	5.099	20.3961	0.25
	5	6	20.025	0.2747
	5.099	5.099	20.3961	0.25
	5	6	21.0238	0.2616
	5.099	6.0828	21.3776	0.2615
	5	6	21	0.2619
	5.099	5.099	21.3776	0.2385
	5	4	21.0238	0.214
	5.099	5	20.3961	0.2476
	5	4	21.0238	0.214
	5	5.099	20.3961	0.2476
	5	4	21.0238	0.214
	5.099	5.099	21.3776	0.2385
	4	4	21.0238	0.1903
	4.1231	4.1231	21.2132	0.1944
	5	4	21.0238	0.214
	5.099	5.099	21.2132	0.2404
	5.099	5	21.0238	0.2402
	5.099	5.099	21.3776	0.2385
	5	4	22.0227	0.2043
	4.1231	5	21.2132	0.215
	4	4	21.0238	0.1903
	5.099	4.1231	21.3776	0.2157
	3	4	22.0227	0.1589
	4.1231	4	21.2132	0.1915
	4	4	22.0227	0.1816
	5.099	5.099	21.3776	0.2385
	4	4.1231	22.0907	0.1839
	4.1231	5	22.3607	0.204
	5.099	4	23.0217	0.1976
	5.099	5.099	21.3776	0.2385
	5	4	22	0.2045
	4.1231	4.1231	21.3776	0.1929
	3	4.1231	22	0.1619
	5.099	4.1231	21.3776	0.2157
	4	4.1231	22.0227	0.1844
	4.1231	4.1231	21.2132	0.1944
	4	4	22	0.1818
	5.099	4.1231	21.2132	0.2174
	4	4	22.0227	0.1816
	4.1231	4.1231	21.2132	0.1944
	4	4	22.0227	0.1816
	5.099	4.1231	21.3776	0.2157
	4	4	22	0.1818
	4.1231	4	21.2132	0.1915
	3	4	22.0227	0.1589
	3.1623	4	21.3776	0.1675
	3	4.1231	22.0227	0.1617
	3	4	21.2132	0.165
	4	3.1623	22.0227	0.1626
	4.1231	4	21.2132	0.1915
	3	3	22	0.1364
	4	4	21.3776	0.1871
	2	2	22	0.0909
	3.1623	2	22.2036	0.1162
	2.2361	1	22	0.0735
	2.2361	2.2361	21.2132	0.1054
	3	3	21	0.1429
	3.1623	3	21.2132	0.1452
	3	4.1231	22	0.1619
	4.1231	4	21.2132	0.1915
	5.099	5	21	0.2405
	5.099	5.099	21.2132	0.2404
	5.099	5	21.0238	0.2402
	6.0828	6.0828	21.3776	0.2845
	6	5.099	21	0.2643
	6.0828	6.0828	21.3776	0.2845
	6	6.0828	21	0.2877
	6.0828	6.0828	20.3961	0.2982
	6	6	22.0227	0.2724
	6.0828	6.0828	21.2132	0.2867
	6	5	22.0227	0.2497
	6.0828	5.099	21.3776	0.2615
	6.0828	5	22.0227	0.2516
	6.3246	6.0828	21.2132	0.2924
	6	5	21.0238	0.2616
	6.0828	6	20.2237	0.2987
	6	5	22	0.25
	6.0828	6.0828	21.2132	0.2867
	6	6	20	0.3
	6.0828	6.0828	20.2237	0.3008
	6.0828	5	21.0238	0.2636
	6.0828	6.0828	20.2237	0.3008
	6	5	21.0238	0.2616
	7.0711	6.0828	21.2132	0.31
	6	5	20.025	0.2747
	6.0828	6.0828	21.3776	0.2845
	6	5	20.025	0.2747
	6.0828	6.0828	20.3961	0.2982
	6	6	21.0238	0.2854
	7.0711	6.0828	20.3961	0.3225
	6	6	21.0238	0.2854
	7.0711	6.0828	21.2132	0.31
	6	5	21.0238	0.2616
	7.0711	6.0828	21.2132	0.31
	6	6	21	0.2857
	6.0828	6.0828	21.3776	0.2845
	6	6	21	0.2857
	6.0828	6.0828	21.3776	0.2845
	7	6.0828	21.0238	0.3111
	6.0828	7.0711	21.3776	0.3077
	6	6	21.0238	0.2854
	6.0828	5.099	20.3961	0.2741
	6	6	21	0.2857
	6.0828	5.099	21.3776	0.2615
	6	5	20	0.275
	6.0828	6.0828	20.3961	0.2982
	5	6	21.0238	0.2616
	5.099	6.0828	20.2237	0.2765
	5	6	21.0238	0.2616
	5.099	5.099	21.2132	0.2404
	6.0828	6	20.025	0.3017
	6.0828	6.0828	20.2237	0.3008
	5	6	20.025	0.2747
	5.099	6.0828	20.2237	0.2765
	6	5	20	0.275
	6.3246	5.099	21.3776	0.2672
	6.0828	6	20	0.3021
	6.3246	6.0828	21.3776	0.2902
	6	6	20	0.3
	6.3246	6.0828	21.3776	0.2902
	6	6	20	0.3
	6.0828	6.0828	21.3776	0.2845
	5	6	19	0.2895
	5.099	6.0828	21.2132	0.2636
	5	5	20	0.25
	5.3852	5.099	20.6155	0.2543
	6	5	19	0.2895
	5.3852	6.0828	21.3776	0.2682
	6	6	20	0.3
	5.3852	6.0828	21.3776	0.2682
	5	6	20	0.275
	6.0828	6.3246	21.3776	0.2902
	5	6	19	0.2895
	6.3246	6.0828	21.3776	0.2902
	6	6.0828	20	0.3021
	6.3246	6.3246	21.3776	0.2959
	6	6.0828	20	0.3021
	6.3246	6.0828	21.587	0.2874
	6.0828	5.099	19	0.2943
	6.0828	6.0828	20.3961	0.2982
	6	6	19	0.3158
	6.0828	6.0828	20.3961	0.2982
	6	7	20	0.325
	6.0828	6.3246	21.3776	0.2902
	6	6	20	0.3
	6.0828	6.3246	21.3776	0.2902
	6.0828	6	20.025	0.3017
	6.0828	6.3246	21.3776	0.2902
	6	6.0828	20	0.3021
	6.0828	6.0828	21.3776	0.2845
	6.0828	7.0711	20	0.3288
	6.0828	6.3246	20.3961	0.3042
	6	6.0828	20	0.3021
	6.0828	6.3246	21.3776	0.2902
	6	6	19	0.3158
	6.0828	6.3246	20.3961	0.3042
	5.099	6	20.025	0.2771
	6.3246	6.0828	21.587	0.2874
	6	6	20	0.3
	6.0828	6.3246	21.3776	0.2902
	6	6	19	0.3158
	6.0828	6.0828	21.3776	0.2845
	5	6	19	0.2895
	5.099	5.099	21.3776	0.2385
	6.0828	5.099	19	0.2943
	5.099	6.3246	20.6155	0.2771
	6	6	19	0.3158
	6.3246	6.0828	20.3961	0.3042
	7	6	19	0.3421
	6.3246	6.0828	21.3776	0.2902
	6	5	19	0.2895
	6.0828	6.3246	20.6155	0.3009
	6.0828	6.0828	19	0.3201
	5.099	5.3852	20.3961	0.257
	5	6	19.0263	0.2891
	5.099	5.3852	20.6155	0.2543
	6.0828	5.099	19	0.2943
	5.099	5.099	21.587	0.2362
	5	6	19	0.2895
	6.0828	6.0828	20.3961	0.2982
	5	6	19	0.2895
	6.0828	6.3246	20.3961	0.3042
	6	5	19	0.2895
	5.099	5.099	21.587	0.2362
	6.0828	7	20	0.3271
	7.2801	6.0828	21.587	0.3095
	6	5	19	0.2895
	6.3246	6.0828	21.3776	0.2902
	6	6.0828	20.025	0.3017
	5.099	6.3246	21.587	0.2646
	5	6	20	0.275
	5.3852	6.0828	21.3776	0.2682
	6	6	20	0.3
	5.3852	5.099	21.587	0.2428
	6	6	19	0.3158
	6.3246	6.0828	21.587	0.2874
	6.0828	7	19	0.3443
	6.3246	6.0828	20.3961	0.3042
	6.0828	6	20	0.3021
	6.3246	6.0828	21.3776	0.2902
	6	6	19	0.3158
	6.0828	6.0828	21.3776	0.2845
	6	5	19	0.2895
	6.3246	6.0828	21.3776	0.2902
	6	6	20	0.3
	6.3246	6.0828	21.3776	0.2902
	6	6	20	0.3
	6.0828	6.0828	21.587	0.2818
	6.0828	6.0828	19	0.3201
	6.3246	6.0828	21.3776	0.2902
	5.099	6	20	0.2775
	5.099	5.099	21.587	0.2362
	6	6	19	0.3158
	6.0828	6.3246	21.587	0.2874
	5.099	6	19	0.2921
	6.3246	6.0828	21.587	0.2874
	5.099	6	20.025	0.2771
	6.3246	6.0828	21.587	0.2874
	6	5	20	0.275
	5.3852	5.099	21.587	0.2428
	6	7	20	0.325
	6.0828	6.3246	20.6155	0.3009
	6	5	19	0.2895
	6.0828	6.3246	20.6155	0.3009
	6	7	19	0.3421
	6.0828	6.3246	20.3961	0.3042
	6.0828	6.0828	19	0.3201
	6.0828	6.0828	20.6155	0.2951
	6.0828	6.0828	19	0.3201
	6.0828	6.0828	20.3961	0.2982
	5.099	6	20	0.2775
	6.3246	6.0828	21.3776	0.2902
	6	6	20	0.3
	6.0828	6.0828	21.3776	0.2845
	6	6.0828	20	0.3021
	6.0828	6.0828	20.3961	0.2982
	5.099	6	20	0.2775
	5.099	6.0828	21.3776	0.2615
	6	6	19	0.3158
	5.3852	5.099	21.587	0.2428
	5	6	20.025	0.2747
	5.3852	5.099	21.587	0.2428
	3.1623	3	21.0238	0.1466
	3.1623	3.1623	21.2132	0.1491
	3.1623	2	21.0238	0.1228
	2.2361	3	21.3776	0.1225
	2.2361	2.2361	21.0238	0.1064
	2.2361	3.1623	21.2132	0.1272
	3	4	20.025	0.1748
	3.1623	3	21.2132	0.1452
	3.1623	4	20.025	0.1788
	4.1231	4.1231	21.3776	0.1929
	3	4	19.0263	0.184
	5.3852	5.099	21.3776	0.2452
	4	4	20.025	0.1998
	4.1231	4.1231	20.3961	0.2022
	4.1231	4	20	0.2031
	4.1231	4.4721	20.6155	0.2085
	5	5	20.025	0.2497
	5.099	5.3852	20.3961	0.257
	5	5	20.025	0.2497
	4.1231	5.099	20.6155	0.2237
	5	5	20	0.25
	5.3852	6.0828	21.587	0.2656
	5	5	20.025	0.2497
	5.099	6.0828	21.587	0.259
	4	5	20	0.225
	5.099	5.099	21.3776	0.2385
	5	6	20	0.275
	5.3852	5.099	21.3776	0.2452
	5	6	20	0.275
	5.099	5.099	21.3776	0.2385
	5	5	20	0.25
	6.0828	6.3246	21.587	0.2874
	5	6	19.0263	0.2891
	6.0828	6.3246	20.6155	0.3009
	5	5	19.0263	0.2628
	5.099	5.3852	20.6155	0.2543
	5	6	20	0.275
	6.0828	6.3246	21.587	0.2874
	6	5	20	0.275
	5.099	6.0828	21.3776	0.2615
	6	5	20	0.275
	5.3852	6.0828	21.3776	0.2682
	6	5	20.025	0.2747
	6.0828	6.3246	21.3776	0.2902
	5	5.099	20	0.2525
	6.0828	6.0828	21.587	0.2818
	5	5	21	0.2381
	5.3852	6.0828	21.3776	0.2682
	5	6	21.0238	0.2616
	6.0828	6.3246	20.3961	0.3042
	5	6	21	0.2619
	6.0828	6.3246	20.3961	0.3042
	5	6	21	0.2619
	6.0828	6.3246	22.3607	0.2774
	5	6	20	0.275
	6.0828	6.3246	20.3961	0.3042
	5	5	20	0.25
	5.099	6.3246	20.3961	0.28
	5.099	5.099	20	0.255
	5.099	6.0828	20.3961	0.2741
	6	5	20.025	0.2747
	5.3852	6.0828	21.3776	0.2682
	6	5	20	0.275
	5.3852	6.0828	21.3776	0.2682
	5	5	20.025	0.2497
	6.0828	6.3246	21.3776	0.2902
	5	5	20	0.25
	4.1231	5.099	20.3961	0.2261
	5	6.0828	20	0.2771
	6.0828	6.3246	21.587	0.2874
	5	6	20	0.275
	5.3852	6.0828	21.587	0.2656
	5	6	20	0.275
	6.0828	6.0828	21.3776	0.2845
	5	6	20	0.275
	6.0828	6.3246	21.587	0.2874
	5	6	20	0.275
	5.099	6.3246	21.3776	0.2672
	6	5	20.025	0.2747
	5.099	6.3246	21.3776	0.2672
	6	5	20.025	0.2747
	6.3246	6.0828	21.587	0.2874
	5	5.099	20	0.2525
	6.3246	6.0828	21.587	0.2874
	5	5	20	0.25
	5.3852	5.3852	21.587	0.2495
	5.099	6	20	0.2775
	5.3852	6.0828	21.3776	0.2682
	5.099	6	20	0.2775
	5.099	5.099	21.3776	0.2385
	6	6.0828	20	0.3021
	6.3246	6.0828	21.587	0.2874
	5	6.0828	20	0.2771
	5.3852	5.099	21.587	0.2428
	6	6	21	0.2857
	5.3852	6.0828	21.3776	0.2682
	6.0828	6	21	0.2877
	5.3852	6.0828	21.3776	0.2682
	5.099	6	20	0.2775
	5.3852	5.099	21.3776	0.2452
	5.099	5	21	0.2405
	6.3246	6.0828	21.3776	0.2902
	6	5	20	0.275
	5.099	6.0828	21.3776	0.2615
	5	5	20.025	0.2497
	6.0828	6.3246	21.3776	0.2902
	5	5	20.025	0.2497
	5.099	6.3246	21.3776	0.2672
	6	5	20	0.275
	6.3246	6.0828	22.3607	0.2774
	6	5	20.025	0.2747
	6.0828	6.3246	21.3776	0.2902
	6	5	20	0.275
	6.0828	6.0828	20.6155	0.2951
	6	5	20	0.275
	6.3246	6.0828	21.3776	0.2902
	5	5	20	0.25
	6.3246	5.099	21.587	0.2646
	5	6	20	0.275
	5.099	5.099	21.3776	0.2385
	6.0828	6	21	0.2877
	5.3852	5.099	21.3776	0.2452
	6.0828	6	21	0.2877
	5.3852	5.099	21.3776	0.2452
	6	6	21	0.2857
	5.3852	5.099	21.3776	0.2452
	6.0828	5.099	21.0238	0.2659
	5.099	5.3852	21.3776	0.2452
	5	5	20.025	0.2497
	5.3852	6.0828	21.3776	0.2682
	5	6.0828	20	0.2771
	5.099	6.0828	21.3776	0.2615
	5	6	20	0.275
	5.099	6.0828	22.3607	0.25
	5	6	20	0.275
	6.0828	6.3246	22.3607	0.2774
	5.099	6	20	0.2775
	5.3852	6.0828	21.3776	0.2682
	5	5	20	0.25
	5.3852	5.099	21.3776	0.2452
	5	5	20	0.25
	5.099	5.099	21.3776	0.2385
	5	6	20	0.275
	5.099	6.3246	21.3776	0.2672
	5.099	4.1231	20	0.2306
	5.099	4.1231	21.3776	0.2157
	4	5	20	0.225
	5.3852	4.1231	20.2237	0.2351
	4	5	20	0.225
	5.099	4.1231	21.3776	0.2157
	4	4	20	0.2
	4.1231	4.1231	21.2132	0.1944
	4	5	20.025	0.2247
	5.099	5.099	21.3776	0.2385
	4.1231	5	19	0.2401
	5.099	4.1231	21.3776	0.2157
	4	5	20	0.225
	5.3852	4.1231	20.3961	0.2331
	4	5	19	0.2368
	5.099	4.1231	20.3961	0.2261
	5.099	5.099	20	0.255
	5.3852	5.099	21.3776	0.2452
	5	4	20	0.225
	5.3852	5.099	21.3776	0.2452
	5	4	21	0.2143
	5.099	4.4721	21.3776	0.2239
	5	4	21	0.2143
	5.099	5.099	21.3776	0.2385
	5	5	20.025	0.2497
	5.099	5.3852	21.3776	0.2452
	5	5	20	0.25
	5.099	5.099	21.3776	0.2385
	5	5	20	0.25
	5.099	5.3852	21.3776	0.2452
	5	5	20	0.25
	5.3852	5.099	21.3776	0.2452
	5	5	20	0.25
	5.3852	5.3852	21.3776	0.2519
	5	5	20	0.25
	5.099	5.3852	21.3776	0.2452
	5.099	5	20	0.2525
	5.3852	5.3852	21.3776	0.2519
	6	5	21	0.2619
	6.3246	6.0828	22.3607	0.2774
	6	5	21	0.2619
	5.099	6.0828	21.3776	0.2615
	5	5.099	20	0.2525
	5.3852	5.099	20.3961	0.257
	5	5.099	21.0238	0.2402
	5.099	6.0828	21.3776	0.2615
	5	5	21.0238	0.2378
	5.099	6.0828	21.3776	0.2615
	5	5	21.0238	0.2378
	5.3852	6.0828	21.3776	0.2682
	5	5	19.0263	0.2628
	5.099	5.099	20.3961	0.25
	5.099	5	20	0.2525
	5.099	5.099	20.3961	0.25
	5	5	20	0.25
	5.099	5.099	21.3776	0.2385
	5	5	21.0238	0.2378
	5.099	5.099	21.3776	0.2385
	5	5	20	0.25
	5.099	5.099	20.3961	0.25
	5.099	6	21	0.2643
	6.0828	5.099	21.2132	0.2636
	5	6	20	0.275
	5.3852	5.099	21.3776	0.2452
	5.099	6.0828	20	0.2795
	5.099	5.099	20.3961	0.25
	5	6	20	0.275
	6.3246	5.099	21.2132	0.2693
	5	6	20.025	0.2747
	6.0828	5.3852	21.3776	0.2682
	5	6.0828	20.025	0.2767
	6.0828	5.099	20.2237	0.2765
	5	6	20	0.275
	6.3246	5.099	21.2132	0.2693
	5	6	21	0.2619
	5.099	5.3852	21.2132	0.2471
	5.099	6	21	0.2643
	6.0828	5.3852	21.2132	0.2703
	5	6	20.025	0.2747
	6.0828	5.099	21.3776	0.2615
	5	6.0828	21.0238	0.2636
	6.3246	5.099	21.3776	0.2672
	6	5.099	21.0238	0.264
	6.0828	6.0828	20.3961	0.2982
	6	5	21.0238	0.2616
	6.3246	6.0828	20.3961	0.3042
	6	5	21	0.2619
	6.0828	5.099	21.3776	0.2615
	5	5	21	0.2381
	6.0828	5.099	20.3961	0.2741
	6	6	21.0238	0.2854
	6.0828	5.099	21.3776	0.2615
	5.099	6	21.0238	0.264
	6.3246	5.099	21.3776	0.2672
	6.0828	5	21.0238	0.2636
	5.099	5.099	21.3776	0.2385
	5	6	21	0.2619
	6.3246	6.0828	20.3961	0.3042
	5	6	21.0238	0.2616
	6.0828	6.0828	21.3776	0.2845
	6.0828	5	21.0238	0.2636
	5.099	5.099	21.3776	0.2385
	5.099	6	21.0238	0.264
	6.0828	6.0828	21.3776	0.2845
	6.0828	5	22.0227	0.2516
	6.0828	5.099	21.3776	0.2615
	6	5	21.0238	0.2616
	6.3246	5.099	21.3776	0.2672
	5.099	6	22.0227	0.252
	6.3246	6.0828	21.3776	0.2902
	6	5	22.0227	0.2497
	5.099	6.0828	21.3776	0.2615
	5	6	21	0.2619
	6.0828	6.0828	21.3776	0.2845
	6	6	22	0.2727
	6.3246	6.0828	21.3776	0.2902
	6.0828	5	22.0227	0.2516
	6.0828	5.099	21.2132	0.2636
	6	5	22.0227	0.2497
	6.3246	5.099	21.2132	0.2693
	5	5	21.0238	0.2378
	5.099	6.0828	21.3776	0.2615
	5.099	5	22.0227	0.2293
	5.099	5.099	21.3776	0.2385
	6	5	22.0227	0.2497
	6.0828	6.0828	22.3607	0.272
	6	6.0828	21	0.2877
	6.0828	6	21.3776	0.2826
	6	5.099	21.0238	0.264
	6.0828	6.0828	21.3776	0.2845
	6	5	21.0238	0.2616
	6.0828	6.0828	21.3776	0.2845
	6	6.0828	21.0238	0.2874
	6.0828	6.0828	20.3961	0.2982
	6	5	21.0238	0.2616
	6.0828	5.099	20.2237	0.2765
	6	5.099	21.0238	0.264
	6.0828	5.099	20.3961	0.2741
	5	5.099	21.0238	0.2402
	6.0828	6.0828	21.3776	0.2845
	6.0828	5	21.0238	0.2636
	6.0828	5.099	21.2132	0.2636
	6.0828	5	21.0238	0.2636
	6.0828	5.099	21.2132	0.2636
	6	5	21.0238	0.2616
	6.0828	5.099	21.3776	0.2615
	6	6	21	0.2857
	6.0828	6.0828	21.3776	0.2845
	5	6.0828	21.0238	0.2636
	5.099	5	21.2132	0.238
	5	6	21.0238	0.2616
	5.099	6.0828	21.3776	0.2615
	5	6	21.0238	0.2616
	6.0828	6.0828	22.3607	0.272
	5	5	20	0.25
	6.0828	6.0828	21.3776	0.2845
	6	6.0828	21.0238	0.2874
	5.099	5.099	21.3776	0.2385
	5	6	21	0.2619
	6.0828	6.0828	21.3776	0.2845
	6	6	20	0.3
	6.0828	6.0828	21.3776	0.2845
	6	6	20	0.3
	5.099	5.099	21.3776	0.2385
	6	6	20	0.3
	5.099	6.0828	20.2237	0.2765
	5	6	21.0238	0.2616
	6.3246	6.0828	21.3776	0.2902
	6	5	21	0.2619
	5.099	6.0828	20.2237	0.2765
	5.099	5	21	0.2405
	5.099	6.0828	20.2237	0.2765
	5	6	21	0.2619
	6.0828	6.0828	20.3961	0.2982
	6	6	21	0.2857
	6.0828	5.099	20.3961	0.2741
	5	6	21.0238	0.2616
	5.099	5.099	21.3776	0.2385
	5	6	21.0238	0.2616
	6.0828	5.099	20.3961	0.2741
	6.0828	5	21	0.2639
	6.0828	6.0828	20.3961	0.2982
	6	5	21	0.2619
	6.0828	6.3246	21.3776	0.2902
	6	5	20	0.275
	6.0828	6.3246	21.2132	0.2924
	6.0828	6	21	0.2877
	6.0828	6.0828	20.2237	0.3008
	6	7	20	0.325
	6.0828	6.3246	21.3776	0.2902
	6	6	20	0.3
	6.0828	6.0828	21.3776	0.2845
	6	6	21.0238	0.2854
	6.0828	7.0711	21.3776	0.3077
	6	6	21	0.2857
	6.0828	6.0828	20.3961	0.2982
	5	6	21.0238	0.2616
	6.3246	5.099	20.3961	0.28
	6	6	20	0.3
	5.099	6.0828	20.3961	0.2741
	6	6	21.0238	0.2854
	6.3246	6.0828	21.3776	0.2902
	6	6	20.025	0.2996
	6.0828	6.0828	21.3776	0.2845
	6	6	20	0.3
	5.099	6.0828	20.3961	0.2741
	6	6	20	0.3
	5.099	6.0828	20.2237	0.2765
	6	6	20	0.3
	5.099	6.0828	20.2237	0.2765
	6	6	20	0.3
	6.0828	6.0828	20.2237	0.3008
	6	6	21	0.2857
	5.099	6.0828	20.2237	0.2765
	6	6	21	0.2857
	6.3246	6.0828	20.2237	0.3068
	6	6	21	0.2857
	6.0828	6.0828	21.2132	0.2867
	6	6	21	0.2857
	6.0828	6.0828	21.2132	0.2867
	6	6	21	0.2857
	6.3246	6.0828	20.2237	0.3068
	6.0828	6	21	0.2877
	6.0828	5.099	20.3961	0.2741
	6	6	22	0.2727
	6.3246	6.0828	21.3776	0.2902
	6	7	20	0.325
	6.0828	6.0828	21.3776	0.2845
	6	5	21	0.2619
	6.0828	6.3246	21.2132	0.2924
	6	6	21	0.2857
	6.0828	6.0828	21.2132	0.2867
	6	6	20	0.3
	6.0828	6.0828	21.2132	0.2867
	6	6	21	0.2857
	6.0828	6.0828	21.2132	0.2867
	6	5	21	0.2619
	5.099	6.0828	21.2132	0.2636
	6	5	21	0.2619
	5.099	6.0828	20.2237	0.2765
	4.1231	3	21.0238	0.1694
	3.1623	3.1623	22.2036	0.1424
	2.2361	3	21	0.1247
	3.1623	2.2361	21.2132	0.1272
	2	3	21.0238	0.1189
	2	3.1623	21.2132	0.1217
	3.1623	3	21.0238	0.1466
	3.1623	3	21.095	0.1461
	5	5	21	0.2381
	5.099	5.3852	21.2132	0.2471
	6	5	20	0.275
	5.099	6.0828	20.2237	0.2765
	6	6	20	0.3
	6.0828	6.0828	20.2237	0.3008
	6	6	20	0.3
	6.0828	6.0828	20.2237	0.3008
	6	6	21	0.2857
	6.0828	6.0828	21.2132	0.2867
	6	6	21	0.2857
	6.0828	6.0828	20.2237	0.3008
	6	7	21.0238	0.3092
	6.3246	7.0711	21.2132	0.3157
	7	7	20.025	0.3496
	6.3246	7.0711	20.2237	0.3312
	6	7	21.0238	0.3092
	6.0828	7.0711	21.3776	0.3077
	6	7	20.025	0.3246
	6.0828	7.0711	21.2132	0.31
	6	7	20.025	0.3246
	6.3246	7.0711	20.3961	0.3284
	6	7	20.025	0.3246
	6.0828	7.0711	21.2132	0.31
	6	7.0711	20.025	0.3264
	7.0711	6.0828	20.3961	0.3225
	6	7	21.0238	0.3092
	6.3246	7.0711	21.3776	0.3133
	7	6	21	0.3095
	7.0711	6.0828	21.3776	0.3077
	6	6	21	0.2857
	7.0711	7.2801	21.3776	0.3357
	7	7	21.0238	0.333
	7.0711	6.3246	20.3961	0.3284
	6	6	21	0.2857
	7.0711	6.0828	21.3776	0.3077
	6	7	21.0238	0.3092
	6.0828	7.0711	21.2132	0.31
	7	6	20	0.325
	7.0711	6.0828	21.3776	0.3077
	6	7.0711	20.025	0.3264
	7.0711	6.3246	20.3961	0.3284
	7	7	20.025	0.3496
	7.0711	6.0828	21.3776	0.3077
	7	6	21.0238	0.3092
	6.0828	7.2801	21.3776	0.3125
	7.0711	6	20	0.3268
	6.0828	7.0711	21.2132	0.31
	6	7.0711	20.025	0.3264
	6.0828	7.0711	21.2132	0.31
	7.0711	7	21.0238	0.3346
	6.0828	7.2801	21.2132	0.315
	6	6.0828	20.0998	0.3006
	6.3246	6.0828	21.2132	0.2924
	7	6	20.025	0.3246
	7.2801	6.0828	21.3776	0.3125
	6	6	20.025	0.2996
	6.0828	6.0828	21.2132	0.2867
	6	6	20.025	0.2996
	6.0828	6.0828	21.3776	0.2845
	6	6.0828	20.0998	0.3006
	7.0711	7.0711	21.2132	0.3333
	6	6.0828	20.0998	0.3006
	7.0711	7.0711	21.2132	0.3333
	6	6.0828	20.0998	0.3006
	6.0828	7.0711	21.2132	0.31
	6.0828	6.0828	20.0998	0.3026
	6.0828	6	21.2132	0.2848
	7	6.0828	20.0998	0.3254
	7.0711	6.0828	21.3776	0.3077
	7.0711	6	20.0998	0.3252
	7.0711	7.0711	21.2132	0.3333
	6.0828	6	20.025	0.3017
	6.0828	7.0711	20.2237	0.3252
	7.0711	6	20.0998	0.3252
	7.0711	7.0711	21.2132	0.3333
	7.0711	6	20.0998	0.3252
	7.0711	7.0711	21.2132	0.3333
	7	6	20.0998	0.3234
	7.0711	6.0828	21.3776	0.3077
	7.0711	6	21.0238	0.3109
	6.0828	6.0828	21.2132	0.2867
	6.0828	7	20.025	0.3267
	7.0711	6.0828	20.2237	0.3252
	6	6	20.0998	0.2985
	6.0828	7.0711	21.2132	0.31
	6	7.0711	20.025	0.3264
	6.0828	7.0711	21.2132	0.31
	7	7	21.0238	0.333
	7.0711	7.0711	20.2237	0.3496
	6	6	20.025	0.2996
	7.0711	7.0711	21.2132	0.3333
	6	6	20.025	0.2996
	7.0711	6.0828	21.2132	0.31
	7	7	20	0.35
	6.0828	7.0711	21.2132	0.31
	7	7	20.025	0.3496
	6.0828	7.0711	20.2237	0.3252
	6	7	21.0238	0.3092
	7.2801	6.0828	21.3776	0.3125
	6	7	19.0263	0.3416
	6.0828	7.0711	20.2237	0.3252
	7	7	20.025	0.3496
	7.2801	7.0711	20.2237	0.3548
	7	6	21	0.3095
	7.2801	6.0828	20.2237	0.3304
	5	6	21	0.2619
	6.0828	6.0828	20.3961	0.2982
	6	5	20	0.275
	6.0828	5.099	21.2132	0.2636
	6	6	21.0238	0.2854
	6.0828	6.0828	20.3961	0.2982
	6	5	21	0.2619
	6.0828	6.0828	20.3961	0.2982
	6	5	20	0.275
	5.099	6.0828	21.3776	0.2615
	6	5	21	0.2619
	5.099	5.099	21.2132	0.2404
	6	6	21	0.2857
	6.0828	5.099	20.2237	0.2765
	6	6	20	0.3
	6.3246	5.099	20.2237	0.2824
	5	5.099	20	0.2525
	6.0828	5.099	20.3961	0.2741
	5	5	20.025	0.2497
	5.099	5.099	20.3961	0.25
	6	5	21	0.2619
	5.099	5.099	20.2237	0.2521
	5	4	21	0.2143
	5.099	5.099	20.3961	0.25
	5.099	5	20.025	0.2522
	5.099	5.099	21.2132	0.2404
	5	5	21.0238	0.2378
	5.099	5.099	20.2237	0.2521
	5	5.099	21.0238	0.2402
	5.099	5	20.2237	0.2497
	5	5	21	0.2381
	5.099	4.1231	20.2237	0.228
	5	5	21.0238	0.2378
	5.099	5.099	21.2132	0.2404
	5	5	20	0.25
	5.099	5.099	21.2132	0.2404
	5	5.099	21	0.2405
	5.099	5	21.2132	0.238
	5	5	21.0238	0.2378
	5.099	5	20.2237	0.2497
	5	5	20.025	0.2497
	5.099	5.099	21.2132	0.2404
	5	5	20.025	0.2497
	5.099	5.099	20.2237	0.2521
	5	5	20.025	0.2497
	5.099	5.099	21.2132	0.2404
	5	5.099	21	0.2405
	5.099	5.099	21.2132	0.2404
	5	5.099	21	0.2405
	5.099	6.0828	21.2132	0.2636
	5	5	21	0.2381
	5.099	6.0828	21.2132	0.2636
	5	5	20	0.25
	4.1231	5.099	21.2132	0.2174
	5	5.099	21.0238	0.2402
	5.099	4	21.2132	0.2145
	4	5	21.0238	0.214
	4.1231	5.099	21.2132	0.2174
	3.1623	3.1623	21.0238	0.1504
	3.1623	3.1623	21.2132	0.1491
	2.2361	3	22	0.119
	2.2361	3	22.0907	0.1185
	2.2361	2	22	0.0963
	2	2	21.095	0.0948
	2	3	22	0.1136
	3.1623	2.2361	22.2036	0.1216
	3	3	21.0238	0.1427
	3.1623	3	21.2132	0.1452
	4.1231	4.1231	20.025	0.2059
	4.1231	5.099	20.2237	0.228
	5	5	20	0.25
	5.099	5.099	21.2132	0.2404
	5.099	5	20.025	0.2522
	5.099	6	21.2132	0.2616
	6	6.0828	21.0238	0.2874
	6.0828	6.0828	21.3776	0.2845
	6.0828	6	20.025	0.3017
	6.0828	6.0828	21.2132	0.2867
	6.0828	6	21.0238	0.2874
	6.0828	6	20.2237	0.2987
	6.0828	6	21.095	0.2864
	6.0828	6.0828	20.3961	0.2982
	6	6.0828	21.0238	0.2874
	6.0828	6.0828	21.3776	0.2845
	6.0828	6	21.095	0.2864
	6.0828	6.0828	21.2132	0.2867
	6	6.0828	21.095	0.2864
	6	5	20.3961	0.2697
	6	6.0828	21.095	0.2864
	6.0828	5	20.3961	0.2717
	6.0828	6	22.0227	0.2743
	7.0711	6.0828	21.2132	0.31
	6	6	21.0238	0.2854
	5	6.0828	21.2132	0.2612
	6.0828	6	21.095	0.2864
	6.0828	6.0828	21.2132	0.2867
	6.0828	6	22.0227	0.2743
	5.099	6.0828	21.2132	0.2636
	6.0828	5	22.0907	0.2508
	6.0828	5.099	21.3776	0.2615
	5	5.099	21.095	0.2394
	6.0828	6	20.2237	0.2987
	6.0828	6	22.0907	0.2735
	6.0828	5.099	21.3776	0.2615
	6.0828	6.0828	22.0907	0.2754
	6.0828	6	21.2132	0.2848
	6	6	21.095	0.2844
	5.099	6.0828	20.2237	0.2765
	5.099	5	21.095	0.2394
	6.0828	5.099	20.3961	0.2741
	6.0828	6.0828	21.095	0.2884
	6.0828	6.0828	21.2132	0.2867
	6	5.099	21.095	0.2631
	6	6.0828	21.2132	0.2848
	5.099	5	22.0907	0.2286
	6.0828	5	20.3961	0.2717
	6.0828	6	21.095	0.2864
	6.0828	6.0828	21.2132	0.2867
	5	5	22.0227	0.227
	5.099	5	21.2132	0.238
	5.099	5.099	21.0238	0.2425
	5.099	4	21.2132	0.2145
	5	5	22.0227	0.227
	5.099	5	21.2132	0.238
	5	4.1231	21.0238	0.217
	5.099	4.1231	21.2132	0.2174
	5	4.1231	21.095	0.2162
	5	5	21.3776	0.2339
	4	4	22.0907	0.1811
	4.1231	5	21.2132	0.215
	4	4	21.095	0.1896
	5.099	4.1231	21.2132	0.2174
	5	5	21.0238	0.2378
	4.1231	4.1231	21.2132	0.1944
	4	4.1231	22.0227	0.1844
	4.1231	4.1231	21.2132	0.1944
	4	5.099	22.0907	0.2059
	4.1231	5	21.095	0.2162
	4	4	21.095	0.1896
	4.1231	4.1231	20.0998	0.2051
	5	5	21.0238	0.2378
	4	5	21.095	0.2133
	5	4	21.0238	0.214
	4.1231	5.099	21.2132	0.2174
	5.099	5	21.095	0.2394
	5.099	5.099	21.2132	0.2404
	5	5	21.095	0.237
	5.099	4.1231	21.2132	0.2174
	5	5.099	21.095	0.2394
	5.099	5	21.2132	0.238
	5	5.099	21.095	0.2394
	5.099	5	21.2132	0.238
	5	5.099	21.0238	0.2402
	4.1231	5.099	21.2132	0.2174
	5.099	5	22.0907	0.2286
	5.099	5.099	21.2132	0.2404
	5	4	21.0238	0.214
	5.099	5.099	21.2132	0.2404
	5	4	21.095	0.2133
	4.1231	5.099	21.2132	0.2174
	5.099	5.099	21.095	0.2417
	4.1231	5.099	21.2132	0.2174
	5	5	21.0238	0.2378
	5.099	4.1231	21.2132	0.2174
	5	5	20.025	0.2497
	5.099	5.099	21.2132	0.2404
	6	5	20.025	0.2747
	5.099	5.099	21.2132	0.2404
	5	5.099	21.095	0.2394
	5.099	5	21.2132	0.238
	5	4	20.025	0.2247
	5.099	5.099	20.2237	0.2521
	5.099	5.099	20.025	0.2546
	5.099	5.099	20.2237	0.2521
	5.099	5	20.025	0.2522
	6.0828	5.099	21.2132	0.2636
	5.099	5	21.095	0.2394
	5.099	5.099	21.2132	0.2404
	5.099	5	21.095	0.2394
	5.099	5.099	20.2237	0.2521
	5.099	5	21.095	0.2394
	5.099	5.099	21.2132	0.2404
	5.099	5	21.0238	0.2402
	5.099	5.099	20.2237	0.2521
	5	5	20.0998	0.2488
	5.099	4.1231	20.2237	0.228
	5.099	5	21.0238	0.2402
	5.099	4.1231	20.2237	0.228
	5.099	5	21.095	0.2394
	5.099	4.1231	20.2237	0.228
	5.099	5	22.0227	0.2293
	5	5.099	21.2132	0.238
	5.099	5.099	21.0238	0.2425
	4.1231	5.099	20.2237	0.228
	4	4	21.0238	0.1903
	5.099	4.1231	20.2237	0.228
	4	4	21.0238	0.1903
	4.1231	4.1231	21.3776	0.1929
	4.1231	4.1231	21.0238	0.1961
	4.1231	5.099	20.2237	0.228
	4	4.1231	21.095	0.1925
	4.1231	4.1231	21.3776	0.1929
	4	4	21.0238	0.1903
	4	4	21.2132	0.1886
	4	4	22.0907	0.1811
	4.1231	3	21.2132	0.1679
	4	4	22.0227	0.1816
	4.1231	4.1231	21.2132	0.1944
	4	4	22.0227	0.1816
	4.1231	4	21.2132	0.1915
	3.1623	3	21.095	0.1461
	4.1231	4.1231	21.2132	0.1944
	4.1231	4.1231	20.025	0.2059
	4.1231	3.1623	20.2237	0.1801
	4	4	20.0998	0.199
	4.1231	3	21.2132	0.1679
	4	4	20.025	0.1998
	3.1623	3	21.2132	0.1452
	4	4	21.0238	0.1903
	3	3	21.2132	0.1414
	4.1231	4.1231	21.0238	0.1961
	3.1623	3.1623	21.2132	0.1491
	4	4	21.095	0.1896
	3.1623	3.1623	21.2132	0.1491
	4	4	21.095	0.1896
	3.1623	3.1623	21.2132	0.1491
	3.1623	3.1623	21.095	0.1499
	3.1623	3.1623	21.2132	0.1491
	3	3	22.0907	0.1358
	3.1623	3	21.3776	0.1441
	4	2	22.0907	0.1358
	2.2361	3.1623	21.2132	0.1272
	4	3	20.0998	0.1741
	3	3.1623	21.3776	0.1441
	3.1623	3.1623	21.095	0.1499
	3	3.1623	21.2132	0.1452
	3	3	21.095	0.1422
	2.2361	3.1623	21.2132	0.1272
	4	4	20.025	0.1998
	3.1623	3.1623	21.2132	0.1491
	3	3	20.025	0.1498
	3.1623	3	21.2132	0.1452
	3	3.1623	21.095	0.1461
	2.2361	3	21.3776	0.1225
	3	3.1623	21.0238	0.1466
	3	2.2361	20.2237	0.1295
	3	3	20.025	0.1498
	2	3.1623	21.2132	0.1217
	3	3	21.0238	0.1427
	3.1623	3.1623	21.2132	0.1491
	3	3	20.025	0.1498
	3.1623	3.1623	20.2237	0.1564
	3	3.1623	21.095	0.1461
	3	4	21.2132	0.165
	3	3	20.025	0.1498
	3.1623	3	21.3776	0.1441
	3	4	20.025	0.1748
	3.1623	3.1623	21.2132	0.1491
	4.1231	4	20.025	0.2028
	3.1623	4.1231	20.2237	0.1801
	4	4	20.025	0.1998
	4.1231	4.1231	21.2132	0.1944
	4	4	21.0238	0.1903
	4.1231	4.1231	21.2132	0.1944
	4	4	21.0238	0.1903
	4.1231	4.1231	21.2132	0.1944
	4	5	21.0238	0.214
	4.1231	4.1231	21.2132	0.1944
	4	4	21.0238	0.1903
	4.1231	4	20.2237	0.2008
	4	4	21.0238	0.1903
	4.1231	4.1231	20.2237	0.2039
	4	4	21.0238	0.1903
	4.1231	4	21.2132	0.1915
	4	4	21.0238	0.1903
	4.1231	4.1231	21.2132	0.1944
	4	4.1231	21.0238	0.1932
	4.1231	4	20.2237	0.2008
	4	4.1231	21.0238	0.1932
	4.1231	4.1231	21.2132	0.1944
	4	5	21.0238	0.214
	4	4	21.2132	0.1886
	4	4	21.0238	0.1903
	4	4	22.2036	0.1802
	4	5	21.0238	0.214
	4.1231	5.099	21.2132	0.2174
	4	4	21.0238	0.1903
	4.1231	5.099	21.2132	0.2174
	4	5	21.0238	0.214
	4	4.1231	21.2132	0.1915
	4	5	21.0238	0.214
	4.1231	4.1231	21.2132	0.1944
	4	4	21.0238	0.1903
	4.1231	4.1231	21.2132	0.1944
	4	4	21.0238	0.1903
	4.1231	5.099	21.2132	0.2174
	4	5	21.0238	0.214
	4.1231	4.1231	21.2132	0.1944
	4	4	22.0227	0.1816
	4	3	21.2132	0.165
	4	3	21.0238	0.1665
	4.1231	4	21.2132	0.1915
	4	3	21.0238	0.1665
	4.1231	3.1623	21.2132	0.1717
	4	5	21.0238	0.214
	4.1231	4.1231	21.2132	0.1944
	4	3.1623	21.0238	0.1703
	4.1231	4.1231	21.2132	0.1944
	3	4	22.0227	0.1589
	3	3	21.2132	0.1414
	3	3	21.0238	0.1427
	3.1623	3	21.2132	0.1452
	4	3.1623	21.0238	0.1703
	3.1623	3.1623	20.2237	0.1564
	3	3	21.0238	0.1427
	3.1623	4.1231	21.2132	0.1717
	4	3	21.0238	0.1665
	3.1623	3	21.2132	0.1452
	3	3	21.0238	0.1427
	3.1623	4	21.2132	0.1688
	4.1231	4.1231	21.0238	0.1961
	4.1231	3	20.2237	0.1761
	3	3	21.0238	0.1427
	3.1623	3	20.2237	0.1524
	3	3.1623	21.0238	0.1466
	3.1623	3.1623	20.2237	0.1564
	3	3	21.0238	0.1427
	3.1623	3.1623	21.2132	0.1491
	3	3	21.0238	0.1427
	3	3	20.2237	0.1483
	3	3	21.0238	0.1427
	4.1231	3.1623	21.095	0.1727
	3	3	21.0238	0.1427
	3.1623	3.1623	21.2132	0.1491
	3	4	21.0238	0.1665
	3	3	21.2132	0.1414
	3	4	21.0238	0.1665
	3	3	20.2237	0.1483
	3	3	21.0238	0.1427
	3.1623	4	20.2237	0.1771
	4	4.1231	21.0238	0.1932
	3.1623	3	20.2237	0.1524
	4	4	21.0238	0.1903
	3.1623	3	21.2132	0.1452
	4	5	21.0238	0.214
	4.1231	4.1231	21.2132	0.1944
	3	4	21.0238	0.1665
	3.1623	4	21.2132	0.1688
	3	4	20.025	0.1748
	3.1623	4.1231	21.2132	0.1717
	3	4	20.025	0.1748
	3.1623	3	21.2132	0.1452
	4	4	21.0238	0.1903
	3	4	21.2132	0.165
	3	4	21	0.1667
	3.1623	4.1231	21.2132	0.1717
	4.1231	4	20	0.2031
	3.1623	3	21.2132	0.1452
	3	4	20.025	0.1748
	3.1623	4.1231	21.2132	0.1717
	4.1231	4	20.025	0.2028
	3.1623	4.1231	21.2132	0.1717
	3	4	20.025	0.1748
	3.1623	4.1231	21.2132	0.1717
	4.1231	4	20.025	0.2028
	3.1623	4.1231	21.2132	0.1717
	4	4	20.025	0.1998
	3.1623	4.1231	21.2132	0.1717
	3	4.1231	21.0238	0.1694
	3.1623	3.1623	21.2132	0.1491
	4	4.1231	21.0238	0.1932
	3.1623	4.1231	21.2132	0.1717
	4	4	20.0998	0.199
	3.1623	4.1231	21.2132	0.1717
	4	4	20	0.2
	3.1623	4.1231	21.2132	0.1717
	4	4	20.025	0.1998
	3.1623	4.1231	21.2132	0.1717
	4	4	20.025	0.1998
	3.1623	4.1231	21.2132	0.1717
	4	4	20	0.2
	3.1623	4.1231	21.2132	0.1717
	4	4	20.025	0.1998
	3.1623	4.1231	21.2132	0.1717
	4	4	20.025	0.1998
	3.1623	4.1231	21.2132	0.1717
	4	4	20.025	0.1998
	3.1623	4	21.2132	0.1688
	4	4	21.0238	0.1903
	3.1623	4.1231	21.2132	0.1717
	4	4	21.0238	0.1903
	3.1623	4.1231	21.2132	0.1717
	4	4	20	0.2
	3.1623	4.1231	21.2132	0.1717
	4	4	21.0238	0.1903
	3.6056	4	21.2132	0.1793
	4	4	20.025	0.1998
	3.1623	4	21.2132	0.1688
	4	4	21.0238	0.1903
	3.1623	4	21.2132	0.1688
	4	4	20	0.2
	3.1623	4.1231	21.2132	0.1717
	4	4	20	0.2
	3.1623	4.1231	21.2132	0.1717
	4	4	20.025	0.1998
	3.1623	4.1231	21.2132	0.1717
	4	4	20	0.2
	3.1623	4	21.2132	0.1688
	4	4	21.095	0.1896
	3.1623	4	21.2132	0.1688
	4.1231	4	21	0.1934
	3.1623	3.1623	21.2132	0.1491
	4.1231	4	20	0.2031
	3.1623	4.1231	21.2132	0.1717
	4	4.1231	21	0.1934
	3.1623	4.1231	21.2132	0.1717
	4	4	20.025	0.1998
	3.1623	4.1231	21.2132	0.1717
	4.1231	4	21.0238	0.1932
	3.1623	3.1623	21.2132	0.1491
	3	4	20.025	0.1748
	4.1231	3.1623	20.2237	0.1801
	3	4.1231	21.0238	0.1694
	4	3	20.2237	0.1731
	3	4	20.025	0.1748
	3	3	20.2237	0.1483
	3	4	21.0238	0.1665
	4.1231	3.1623	21.095	0.1727
	3	4	21.0238	0.1665
	4.1231	4.1231	21.2132	0.1944
	3	4	20	0.175
	4.1231	4.1231	21.2132	0.1944
	4	3	20.025	0.1748
	4.1231	4.1231	20.2237	0.2039
	4	4	21	0.1905
	3.1623	4.1231	21.2132	0.1717
	4	5	21.0238	0.214
	4.1231	4.1231	21.2132	0.1944
	4	4	20.025	0.1998
	4.1231	4.1231	21.2132	0.1944
	4	5	22	0.2045
	4.1231	4.1231	22.2036	0.1857
	4	3	22.0227	0.1589
	4.1231	4.1231	21.2132	0.1944
	4	3	21.0238	0.1665
	3.1623	4.1231	21.2132	0.1717
	4	3	21.0238	0.1665
	4.1231	4.1231	21.2132	0.1944
	3	4	20.025	0.1748
	4.1231	4.1231	21.2132	0.1944
	3	4	21.0238	0.1665
	3.1623	4.1231	21.2132	0.1717
	4	3	21.0238	0.1665
	4.1231	4.1231	21.095	0.1955
	4	3	21.0238	0.1665
	3.1623	4.1231	20.0998	0.1812
	4	4	21	0.1905
	3.1623	4.1231	20.2237	0.1801
	4	4	21	0.1905
	4.1231	4.1231	20.2237	0.2039
	4	3	21.0238	0.1665
	3.1623	4.1231	20.2237	0.1801
	3	4	21	0.1667
	4.1231	4.1231	21.2132	0.1944
	4	3	21	0.1667
	4.1231	4.1231	20.2237	0.2039
	4	4	21	0.1905
	4.1231	4.1231	20.2237	0.2039
	4	4	21	0.1905
	4.1231	4.1231	21.2132	0.1944
	3.1623	4	22.0227	0.1626
	4.1231	3.1623	21.2132	0.1717
	3	4	21.0238	0.1665
	4.1231	3.1623	21.2132	0.1717
	4	4	21.0238	0.1903
	4.1231	4.1231	22.2036	0.1857
	3	4	22	0.1591
	4.1231	3.1623	20.0998	0.1812
	5	4	21.0238	0.214
	4.1231	5	21.095	0.2162
	3.1623	4	20.025	0.1788
	4.1231	4.1231	21.095	0.1955
	4	4	21.0238	0.1903
	4.1231	4	22.2036	0.1829
	3	4	21.0238	0.1665
	4.1231	4.1231	20.2237	0.2039
	3	4	21.0238	0.1665
	4.1231	4.1231	21.2132	0.1944
	4	4	21.0238	0.1903
	4.1231	4.1231	21.2132	0.1944
	3	4	20	0.175
	4	4	21.095	0.1896
	4	4	20.025	0.1998
	4	4	21.095	0.1896
	5	4	21.0238	0.214
	4.1231	4.1231	21.2132	0.1944
	4	4	21.0238	0.1903
	4.1231	4.1231	21.095	0.1955
	4	4	21	0.1905
	4.1231	3	21.095	0.1688
	3	4	20.025	0.1748
	3.1623	4	21.095	0.1698
	3	4	20.025	0.1748
	4.1231	3.1623	20.2237	0.1801
	4	4	21	0.1905
	4	4	20.2237	0.1978
	3	3	20.025	0.1498
	3.1623	3.1623	21.2132	0.1491
	4.1231	4	21	0.1934
	3.1623	4	22.0907	0.1621
	4	4	21	0.1905
	3	3	20.2237	0.1483
	3	4	20	0.175
	4.1231	3.1623	21.095	0.1727
	4	4	20	0.2
	3.1623	4	21.095	0.1698
	4	4	20.025	0.1998
	3.1623	4.1231	21.095	0.1727
	4	4	20	0.2
	4.1231	4.1231	20.0998	0.2051
	3.1623	4	21.0238	0.1703
	4.1231	3.1623	21.2132	0.1717
	4.1231	4	20.025	0.2028
	4	5	20.2237	0.2225
	4	4	21.0238	0.1903
	3.1623	4.1231	21.2132	0.1717
	4.1231	4	20	0.2031
	3.1623	4.1231	21.2132	0.1717
	4.1231	4	20	0.2031
	4.1231	4	20.2237	0.2008
	4.1231	3	20	0.1781
	3.1623	4.1231	21.2132	0.1717
	4.1231	3	21	0.1696
	3.1623	4	21.2132	0.1688
	4	3	21	0.1667
	3	4	21.2132	0.165
	4	4	20	0.2
	4.1231	4.1231	20.2237	0.2039
	4	5	21	0.2143
	4.1231	4.1231	21.2132	0.1944
	4	4	21	0.1905
	3.1623	4.1231	21.2132	0.1717
	4.1231	4	21.0238	0.1932
	3.1623	4.1231	20.2237	0.1801
	3	4	21	0.1667
	3.1623	4.1231	21.2132	0.1717
	4	3.1623	21	0.1705
	3.1623	4.1231	21.2132	0.1717
	3	4	21	0.1667
	3.1623	4.1231	21.2132	0.1717
	3	3.1623	21	0.1467
	3.1623	4.1231	21.2132	0.1717
	3	4	21	0.1667
	3.1623	4.1231	21.2132	0.1717
	3	4	21.0238	0.1665
	4.1231	4.1231	21.2132	0.1944
	3	4	21.0238	0.1665
	3.1623	4	22.2036	0.1613
	4	4	21.0238	0.1903
	4	4	21.2132	0.1886
	3	4	22.0227	0.1589
	3.1623	4.1231	21.2132	0.1717
	3	4	21.0238	0.1665
	4.1231	3.1623	21.2132	0.1717
	3	4	21	0.1667
	3.1623	4.1231	21.2132	0.1717
	4	4	20.025	0.1998
	4.1231	3.1623	21.2132	0.1717
	3	4	21	0.1667
	4	4	21.2132	0.1886
	3.1623	4	21	0.1705
	4.1231	4	22.2036	0.1829
	3	4	21.0238	0.1665
	4.1231	4	21.2132	0.1915
	3	4	21.0238	0.1665
	3.1623	4	21.2132	0.1688
	3	4	21.0238	0.1665
	3.1623	4.1231	21.2132	0.1717
	4	4	21.0238	0.1903
	4.1231	4.1231	21.2132	0.1944
	4	4	21	0.1905
	4.1231	4.1231	21.2132	0.1944
	4	4	21.0238	0.1903
	4.1231	4.1231	21.2132	0.1944
	3	4	21	0.1667
	4.1231	4.1231	21.2132	0.1944
	4	4	21.0238	0.1903
	4.1231	4.1231	21.2132	0.1944
	3	4	21.0238	0.1665
	4.1231	4.1231	21.2132	0.1944
	4	4	21.0238	0.1903
	4	4.1231	21.2132	0.1915
	4	4	21.0238	0.1903
	4.1231	4.1231	21.2132	0.1944
	4	4	21.0238	0.1903
	4.1231	4.1231	21.2132	0.1944
	3	4	21.0238	0.1665
	4.1231	4.1231	21.2132	0.1944
	3	4	21.0238	0.1665
	3.1623	4.1231	21.2132	0.1717
	4	4	21	0.1905
	4.1231	4.1231	21.2132	0.1944
	4	4	21.0238	0.1903
	4.1231	4.1231	21.2132	0.1944
	4	4	21.0238	0.1903
	4	4.1231	21.2132	0.1915
	4	4	21.0238	0.1903
	4.1231	4.1231	21.2132	0.1944
	4	4	21.0238	0.1903
	4.1231	4.1231	21.2132	0.1944
	3	4	21.0238	0.1665
	3.1623	4.1231	21.2132	0.1717
	5	4	21.0238	0.214
	4.1231	4.1231	21.2132	0.1944
	4	4	21	0.1905
	4.1231	4.1231	21.2132	0.1944
	3	4	21	0.1667
	3.1623	4.1231	21.2132	0.1717
	3	4	21.0238	0.1665
	3.1623	3	21.2132	0.1452
	4	3	21.0238	0.1665
	4.1231	3.1623	21.2132	0.1717
	2.2361	2	21	0.1009
	2.2361	2	21.2132	0.0998
	2.2361	1	22	0.0735
	1.4142	2	21.2132	0.0805
	2.2361	2	21	0.1009
	2.2361	2	21.2132	0.0998
	2	3	21	0.119
	3.1623	3.1623	21.2132	0.1491
	3	4	20	0.175
	3.1623	4.1231	20.2237	0.1801
	4	5.099	20.025	0.2272
	5.099	5.099	20.2237	0.2521
	5	5.099	21.0238	0.2402
	5.099	5.099	20.2237	0.2521
	5	5	21.0238	0.2378
	5.099	5.099	20.2237	0.2521
	5	5	21.0238	0.2378
	5.099	5.099	20.2237	0.2521
	5	5	20.025	0.2497
	5.099	6	20.2237	0.2744
	5	6	20.025	0.2747
	6.0828	6.0828	20.2237	0.3008
	6.0828	5	21.0238	0.2636
	5.099	6.0828	20.2237	0.2765
	5.099	5	21.0238	0.2402
	5.099	6	21.2132	0.2616
	6	5	20.025	0.2747
	5.099	6	20.2237	0.2744
	6.0828	5.099	19.0263	0.2939
	6.0828	5.099	20.2237	0.2765
	6.0828	6.0828	21.0238	0.2893
	6.0828	5.099	20.3961	0.2741
	6	6	20	0.3
	6.0828	5.099	20.3961	0.2741
	6	5	20	0.275
	5.099	6.0828	20.3961	0.2741
	6	5	20.025	0.2747
	6.0828	6.0828	21.3776	0.2845
	6	6.0828	21.095	0.2864
	6.0828	6.0828	21.3776	0.2845
	6.0828	6	20.025	0.3017
	6.0828	6.0828	21.3776	0.2845
	6	6	20.0998	0.2985
	6.0828	6.0828	21.3776	0.2845
	6.0828	6	20.025	0.3017
	6.0828	6.0828	20.3961	0.2982
	6.0828	6	20	0.3021
	6.0828	6.0828	20.3961	0.2982
	6	6	21.0238	0.2854
	6.0828	5.099	21.3776	0.2615
	5	5.099	21.0238	0.2402
	5.3852	5.099	20.2237	0.2592
	4	5	21.0238	0.214
	5.099	5.099	20.2237	0.2521
	5	4	21.0238	0.214
	4.1231	4.1231	20.2237	0.2039
	5	5.099	20.025	0.2522
	5.099	5.3852	20.2237	0.2592
	5	5	20	0.25
	5.099	4.1231	21.2132	0.2174
	5	5	20.025	0.2497
	5.3852	5.099	21.2132	0.2471
	4	5	20	0.225
	4.4721	5.099	20.2237	0.2366
	4.1231	5	20	0.2281
	4.1231	5.099	21.2132	0.2174
	5	5	20	0.25
	5.099	5.099	21.2132	0.2404
	5	5	20	0.25
	5.3852	5.099	20.3961	0.257
	5	5	20	0.25
	5.099	5.099	21.3776	0.2385
	5	5	20	0.25
	4.1231	5.099	20.3961	0.2261
	5	5	20	0.25
	4.1231	5.099	21.2132	0.2174
	5	5	20	0.25
	5.099	5.099	20.3961	0.25
	4	5	20	0.225
	4.1231	5	20.3961	0.2236
	5	5	21	0.2381
	4.1231	5.099	21.3776	0.2157
	5	5	21	0.2381
	4.1231	5.099	20.2237	0.228
	5	5	21	0.2381
	5.099	5.099	21.2132	0.2404
	5	5	21	0.2381
	5.099	5.099	20.2237	0.2521
	5	5	21	0.2381
	5.099	5.099	20.2237	0.2521
	4	5	20	0.225
	4.1231	4.1231	21.2132	0.1944
	5	4	21	0.2143
	5.3852	5.099	20.2237	0.2592
	5	5	21	0.2381
	5.099	5.099	20.2237	0.2521
	5	5	21	0.2381
	5.099	5.099	21.2132	0.2404
	5	4	21	0.2143
	4.1231	5.099	21.2132	0.2174
	4	5	21	0.2143
	5.099	4.1231	20.2237	0.228
	4	5	21	0.2143
	5.099	5.099	20.2237	0.2521
	4	5	21	0.2143
	4.1231	4.1231	21.2132	0.1944
	4	3	20	0.175
	3.1623	4.1231	20.0998	0.1812
	4	5	21	0.2143
	4.1231	5	20.2237	0.2256
	4	4	21	0.1905
	4.1231	5.099	21.095	0.2186
	4.1231	3	21	0.1696
	4.1231	3	21.3776	0.1666
	3	3	21.0238	0.1427
	3.1623	2.2361	21.2132	0.1272
	2.2361	2	21	0.1009
	2.2361	2	21.095	0.1004
	2	3	21	0.119
	2.2361	3.1623	21.095	0.128
	3	4.1231	21	0.1696
	4.1231	4	21.2132	0.1915
	5	5	21.0238	0.2378
	5.099	5.099	20.2237	0.2521
	6.0828	5.099	20.025	0.2792
	6.0828	5.099	20.3961	0.2741
	6	6.0828	21.0238	0.2874
	6.3246	5.099	20.3961	0.28
	6.0828	6	20	0.3021
	6.0828	5.099	20.3961	0.2741
	7.0711	6	20.025	0.3264
	7.2801	6.0828	20.3961	0.3276
	6	6	20	0.3
	6.0828	5.099	21.3776	0.2615
	6.0828	6	20.0998	0.3006
	6.0828	5.099	20.3961	0.2741
	7.0711	6	20.025	0.3264
	7.0711	6.0828	21.3776	0.3077
	6.0828	6	20.025	0.3017
	6.0828	5.099	21.3776	0.2615
	6	6.0828	21.0238	0.2874
	6.0828	6.0828	20.2237	0.3008
	6	6	21.0238	0.2854
	6.0828	6.0828	20.2237	0.3008
	6	6.0828	20.025	0.3017
	6.0828	6.0828	21.3776	0.2845
	6	6.0828	21.0238	0.2874
	6.0828	5.099	21.3776	0.2615
	6.0828	6	21.0238	0.2874
	6.0828	6.0828	20.3961	0.2982
	6	6	20.025	0.2996
	6.0828	6.0828	20.3961	0.2982
	6	6.0828	21.0238	0.2874
	6.0828	6.0828	21.3776	0.2845
	6	6.0828	21.095	0.2864
	6.0828	6.0828	20.3961	0.2982
	6.0828	6	21	0.2877
	6.0828	6.0828	20.2237	0.3008
	6.0828	6	21	0.2877
	6.3246	6.0828	20.2237	0.3068
	7.0711	6	20.0998	0.3252
	6.0828	6.0828	21.3776	0.2845
	6.0828	7	20.025	0.3267
	7.0711	6.3246	21.3776	0.3133
	6.0828	6	21.0238	0.2874
	6.0828	6.0828	20.3961	0.2982
	6	6.0828	21.0238	0.2874
	7.0711	6.0828	21.3776	0.3077
	6.0828	6	21.0238	0.2874
	6.0828	6.0828	20.3961	0.2982
	6	6.0828	20.025	0.3017
	6.0828	6.0828	21.3776	0.2845
	6.0828	5	20.025	0.2767
	6.0828	6.0828	21.3776	0.2845
	6	7	21.0238	0.3092
	6.0828	6.0828	21.3776	0.2845
	6.0828	6	21.0238	0.2874
	7.0711	6.0828	21.3776	0.3077
	6.0828	6	20.0998	0.3006
[truncated: 16,047 more rows]

## Sheet: eyeblink8-11
	A	B	C	EAR
	4	3.1623	18.0278	0.1986
	4	3	21.095	0.1659
	4	4.1231	21.095	0.1925
	4	4	20.025	0.1998
	4.1231	5	21.2132	0.215
	4.1231	4	21.0238	0.1932
	4.1231	4	22.2036	0.1829
	4	5	21.0238	0.214
	4.1231	4	21.2132	0.1915
	5	5	21.0238	0.2378
	4	4.1231	21.2132	0.1915
	5	4	21.095	0.2133
	5.099	5	22.2036	0.2274
	5	4	21.095	0.2133
	4	4.1231	21.2132	0.1915
	4	4	21.095	0.1896
	5.099	4	22.2036	0.2049
	5	5	21.0238	0.2378
	4.1231	4.1231	21.2132	0.1944
	6.0828	5	21.0238	0.2636
	5.099	5	21.2132	0.238
	5.099	5.099	21.095	0.2417
	5.099	5.099	22.2036	0.2296
	5.099	5.099	22.2036	0.2296
	5.099	5	21.095	0.2394
	6	5	21.2132	0.2593
	4.1231	4.1231	20.2237	0.2039
	6	5	21.2132	0.2593
	5.099	5.099	21.2132	0.2404
	6.0828	5	22.2036	0.2496
	5	4	21.095	0.2133
	5.099	5	21.095	0.2394
	4	5	21.095	0.2133
	5.099	5	20.2237	0.2497
	4.1231	4	22.2036	0.1829
	6.0828	5	22.2036	0.2496
	5	5.099	21.2132	0.238
	5.099	5	22.0907	0.2286
	5	5.099	21.095	0.2394
	5.099	5	23.1948	0.2177
	5	5.099	21.095	0.2394
	5	5.099	21.095	0.2394
	5.099	5	21.2132	0.238
	5	5.099	21.2132	0.238
	4.1231	4	22.0907	0.1839
	4.1231	5	22.0907	0.2065
	4	4	22.0907	0.1811
	4	5	21.095	0.2133
	4.1231	5.099	21.095	0.2186
	5.099	6	22.0907	0.2512
	4	4.1231	21.095	0.1925
	5	5	22.0907	0.2263
	4.1231	5	21.095	0.2162
	5	6	22.0907	0.249
	5.099	6.0828	21.2132	0.2636
	6	5.099	21.2132	0.2616
	5	6.0828	20.0998	0.2757
	6.0828	6	22.2036	0.2721
	5.099	5.099	21.2132	0.2404
	6.0828	6	21.2132	0.2848
	5	6.0828	21.095	0.2627
	6.0828	6	22.0907	0.2735
	6	5	20.0998	0.2736
	6	6.0828	21.095	0.2864
	5.099	5.099	21.095	0.2417
	6.0828	6	22.0907	0.2735
	5.099	5	20.0998	0.2512
	5	5.099	22.0907	0.2286
	5.099	5	21.095	0.2394
	5.099	5	21.095	0.2394
	5.099	5	21.095	0.2394
	5	5	21.095	0.237
	6	6.0828	21.095	0.2864
	7	6	21.095	0.3081
	5	5.099	22.0907	0.2286
	5.099	5	22.0907	0.2286
	5.099	5	21.095	0.2394
	5.099	5.099	21.095	0.2417
	6.0828	6.0828	21.095	0.2884
	6.0828	6.0828	21.095	0.2884
	6	6.0828	21.0238	0.2874
	6.0828	6.0828	21.095	0.2884
	5.099	5.099	20.2237	0.2521
	6.0828	6.0828	21.3776	0.2845
	5	6.0828	21.095	0.2627
	6.0828	5	21.095	0.2627
	5.099	5	20.0998	0.2512
	5	5.099	20.0998	0.2512
	6.0828	6	20.0998	0.3006
	6.0828	6	21.2132	0.2848
	6	6.0828	21.095	0.2864
	6.0828	6	20.2237	0.2987
	6.0828	6.0828	21.2132	0.2867
	6.0828	6	21.2132	0.2848
	6.0828	6.0828	21.2132	0.2867
	6.0828	5	21.2132	0.2612
	6.0828	6	21.095	0.2864
	6	6.0828	21.2132	0.2848
	5.099	6	20.0998	0.2761
	6	5.099	20.2237	0.2744
	5	5	22.0907	0.2263
	6.0828	6.0828	20.2237	0.3008
	6	6.0828	21.095	0.2864
	6.0828	7.0711	20.0998	0.3272
	6.0828	6	21.0238	0.2874
	6.0828	5.099	20.2237	0.2765
	5.099	5.099	21.095	0.2417
	6.0828	6	21.2132	0.2848
	5	6.0828	21.095	0.2627
	6.0828	6.0828	20.2237	0.3008
	6	6.0828	22.0907	0.2735
	7.0711	6.0828	21.2132	0.31
	6.0828	6	21.0238	0.2874
	7.0711	6.0828	21.2132	0.31
	6.0828	6.0828	21.095	0.2884
	7.0711	6.0828	21.2132	0.31
	6.0828	6	21.095	0.2864
	7.0711	6.0828	22.2036	0.2962
	6	6.0828	21.095	0.2864
	7.0711	6.0828	21.2132	0.31
	6.0828	6.0828	21.095	0.2884
	7.0711	6.0828	21.2132	0.31
	6	6.0828	21.095	0.2864
	7.0711	6	20.2237	0.3232
	6	6.0828	21.095	0.2864
	6.0828	6.0828	20.3961	0.2982
	6.0828	6	21.095	0.2864
	6.0828	6.0828	21.2132	0.2867
	5	6.0828	21.095	0.2627
	6	5	21.2132	0.2593
	5	6.0828	21.095	0.2627
	6.0828	6.0828	21.095	0.2884
	6.0828	6	22.0907	0.2735
	6.0828	6	20.3961	0.2962
	6	6.0828	21.0238	0.2874
	5.099	6.0828	21.2132	0.2636
	5	5	20.025	0.2497
	6.0828	5.099	20.2237	0.2765
	5	5.099	21.095	0.2394
	6.0828	5	21.2132	0.2612
	5.099	5	21.095	0.2394
	6.0828	5.099	21.3776	0.2615
	5	5	22.0907	0.2263
	6	5.099	21.3776	0.2596
	4	5.099	21.095	0.2157
	5.099	5.099	21.2132	0.2404
	5	6	20.0998	0.2736
	5.099	5.099	20.3961	0.25
	5	5	20.025	0.2497
	5	5	20.2237	0.2472
	5.099	5.099	21.095	0.2417
	5.099	6.0828	21.2132	0.2636
	5.099	5	21.095	0.2394
	6.0828	6.0828	21.095	0.2884
	5	5	21.095	0.237
	6.0828	6	21.2132	0.2848
	5.099	5	21.095	0.2394
	5.099	6	21.2132	0.2616
	5.099	5.099	21.095	0.2417
	5	6.0828	21.2132	0.2612
	5.099	5	21.095	0.2394
	5.099	6	21.2132	0.2616
	4.1231	4	22.0907	0.1839
	5	4	21.2132	0.2121
	4	4.1231	22.0227	0.1844
	3.1623	3.1623	21.095	0.1499
	3	3.1623	23.0217	0.1338
	4	4	21.095	0.1896
	3	3	21.0238	0.1427
	3.1623	3	21.2132	0.1452
	5.099	5	22.0227	0.2293
	5	5	21.2132	0.2357
	5	5	21.0238	0.2378
	5	5	21.2132	0.2357
	5	5	20.025	0.2497
	6.0828	5.099	21.2132	0.2636
	6	5.099	21.0238	0.264
	6	5.099	21.2132	0.2616
	5	5.099	20.0998	0.2512
	5	5	21.3776	0.2339
	5	4.1231	21.095	0.2162
	5.099	5.099	22.3607	0.228
	5.099	5.099	20.025	0.2546
	6	5.099	21.2132	0.2616
	6	5.099	21.095	0.2631
	6.0828	6	21.2132	0.2848
	5	5.099	21.0238	0.2402
	5.099	5	22.2036	0.2274
	5.099	5	20.025	0.2522
	5.099	5	21.2132	0.238
	5	5.099	21.0238	0.2402
	5.099	5.099	21.3776	0.2385
	5.099	5	22.0907	0.2286
	5.099	5	22.2036	0.2274
	5	5	20.0998	0.2488
	6.0828	5	21.2132	0.2612
	5	5.099	22.0907	0.2286
	6.0828	5	21.2132	0.2612
	5.099	5	21.095	0.2394
	5	5.099	22.2036	0.2274
	5	5	20.0998	0.2488
	5.099	6	20.2237	0.2744
	5	6	20.0998	0.2736
	5.099	6	20.2237	0.2744
	4	6	20.0998	0.2488
	5.099	6	20.2237	0.2744
	5.099	5	22.0907	0.2286
	6.0828	6.0828	21.2132	0.2867
	5.099	5	21.095	0.2394
	6.0828	6.0828	21.2132	0.2867
	5.099	5	20.0998	0.2512
	6.0828	5	20.2237	0.274
	4	6	21.095	0.237
	5.099	6	22.2036	0.2499
	5	5.099	21.095	0.2394
	6	6.0828	21.2132	0.2848
	5	6.0828	21.095	0.2627
	6.0828	5.099	21.2132	0.2636
	5	5	20.0998	0.2488
	6	5.099	21.2132	0.2616
	6	6	21.095	0.2844
	6.0828	5.099	21.2132	0.2636
	5	6	21.095	0.2607
	6	5.099	21.2132	0.2616
	5.099	5	20.0998	0.2512
	5.099	6	21.2132	0.2616
	5.099	5	22.0907	0.2286
	5.099	5	22.2036	0.2274
	4.1231	5	21.0238	0.217
	6.0828	5.099	21.2132	0.2636
	5.099	5	22.0227	0.2293
	6.0828	5	22.3607	0.2478
	5.099	5	21.095	0.2394
	5.099	5.099	22.2036	0.2296
	5	5	22.0907	0.2263
	5	5.099	21.2132	0.238
	5	5	21.0238	0.2378
	5.099	5.099	21.095	0.2417
	5	5	22.0907	0.2263
	5	5.099	21.2132	0.238
	5	5.099	21.095	0.2394
	5.099	5	21.2132	0.238
	5	5.099	21.095	0.2394
	5	5	21.2132	0.2357
	4	5	21.095	0.2133
	5	5.099	21.2132	0.238
	4	4.1231	21.095	0.1925
	5.099	5.099	21.2132	0.2404
	5	5.099	21.0238	0.2402
	5.099	5.099	21.2132	0.2404
	5	5.099	21.095	0.2394
	5.099	6.0828	21.2132	0.2636
	5.099	5	21.0238	0.2402
	5	5.099	21.3776	0.2362
	4	5	21.095	0.2133
	6.0828	5.099	21.095	0.265
	4.1231	4	21.095	0.1925
	5.099	5.099	21.2132	0.2404
	4.1231	5.099	21.095	0.2186
	5.099	6.0828	21.2132	0.2636
	6.0828	6	22.0907	0.2735
	6.0828	6.0828	23.3452	0.2606
	5	5	20.0998	0.2488
	6	5.099	21.095	0.2631
	5.099	5	20.0998	0.2512
	6	6.0828	21.2132	0.2848
	5.099	5	20.025	0.2522
	6	5.099	21.2132	0.2616
	5	5	21.0238	0.2378
	6.0828	6.0828	21.095	0.2884
	5	5	21.095	0.237
	6.0828	6	21.2132	0.2848
	5.099	5	20.0998	0.2512
	6.0828	6.0828	21.095	0.2884
	5.099	5	20.0998	0.2512
	6.0828	5.099	21.2132	0.2636
	4	4	20.0998	0.199
	5.099	5.099	21.3776	0.2385
	5.099	6	21.095	0.2631
	6.0828	5.099	21.2132	0.2636
	4.1231	4	20.0998	0.2021
	5.099	5.099	22.3607	0.228
	5.099	5	20.0998	0.2512
	6.0828	5.099	21.2132	0.2636
	5	5	20.0998	0.2488
	6.0828	5.099	20.2237	0.2765
	5	5	20.0998	0.2488
	5.099	5	21.2132	0.238
	5	5.099	21.2132	0.238
	5.099	6	22.2036	0.2499
	5	5	20.0998	0.2488
	5.099	5	21.2132	0.238
	5.099	5	20.0998	0.2512
	5.099	5	20.2237	0.2497
	5	5.099	21.0238	0.2402
	6.0828	5.099	21.2132	0.2636
	5	5	20.0998	0.2488
	6	5.099	21.2132	0.2616
	4	5	20.0998	0.2239
	5.099	5.099	21.2132	0.2404
	5	5	20.0998	0.2488
	6	5	21.2132	0.2593
	5	5	20.025	0.2497
	6.0828	5	20.2237	0.274
	5	6	20.025	0.2747
	6.0828	6	20.2237	0.2987
	6	6.0828	20.025	0.3017
	6.0828	5	20.2237	0.274
	6	6.0828	20.025	0.3017
	6.0828	6.0828	20.2237	0.3008
	5	6.0828	20.0998	0.2757
	6.0828	5.099	21.2132	0.2636
	5	5	20.0998	0.2488
	6.0828	6	20.2237	0.2987
	5.099	5	20.0998	0.2512
	6.0828	5.099	21.2132	0.2636
	5	5	20.0998	0.2488
	5.099	5.099	21.2132	0.2404
	5	5	20.0998	0.2488
	6.0828	5	20.2237	0.274
	5	5	20.0998	0.2488
	6.0828	5	20.2237	0.274
	5	5	20.0998	0.2488
	6.0828	6.0828	20.2237	0.3008
	5	5.099	20.025	0.2522
	6.0828	5.099	21.2132	0.2636
	5	5.099	20.025	0.2522
	6.0828	5	21.2132	0.2612
	5	5	20.0998	0.2488
	6.0828	5.099	21.2132	0.2636
	5.099	5	20.0998	0.2512
	6.0828	5	20.2237	0.274
	5	5	20.0998	0.2488
	6.0828	6	21.095	0.2864
	5	5.099	21.095	0.2394
	6.0828	6	22.2036	0.2721
	5	5.099	20.0998	0.2512
	6.0828	6	20.2237	0.2987
	5.099	5	20.0998	0.2512
	6.0828	6.0828	21.3776	0.2845
	5.099	5.099	19.105	0.2669
	6.0828	5.099	20.2237	0.2765
	5.099	6.0828	20.0998	0.2782
	6.0828	6	20.0998	0.3006
	5.099	5.099	19.105	0.2669
	6.0828	5.099	21.095	0.265
	5.099	5.099	20.0998	0.2537
	5	5	21.2132	0.2357
	5	5.099	21.095	0.2394
	6.0828	5	21.095	0.2627
	6	6.0828	20.0998	0.3006
	6	5	21.2132	0.2593
	6	5.099	20.0998	0.2761
	6.0828	5	21.2132	0.2612
	5.099	6.0828	19.0263	0.2939
	6.0828	5.099	20.2237	0.2765
	4	5.099	19.105	0.2381
	6	5	20.0998	0.2736
	4.1231	5.099	20.0998	0.2294
	6	5	21.2132	0.2593
	6	6.0828	21.095	0.2864
	6	5	21.2132	0.2593
	4	6.0828	19.105	0.2639
	5.099	5	21.095	0.2394
	4	5	20.0998	0.2239
	5	5	21.2132	0.2357
	4	4.1231	21.095	0.1925
	4	4	21.2132	0.1886
	4	4	20.0998	0.199
	5	4	21.2132	0.2121
	4	5	20.0998	0.2239
	6.0828	5	21.095	0.2627
	4	5	20.0998	0.2239
	6.0828	5.099	22.0907	0.2531
	4	4	20.0998	0.199
	5.099	5.099	21.2132	0.2404
	4	6.0828	20.0998	0.2508
	6.0828	5	21.3776	0.2592
	6	6.0828	21.095	0.2864
	6.0828	6.0828	21.2132	0.2867
	5	6.0828	21.095	0.2627
	5.099	6.0828	21.2132	0.2636
	4	5	20.0998	0.2239
	5	6	20.0998	0.2736
	4	4	20.0998	0.199
	5.099	5	20.2237	0.2497
	4	4	19.105	0.2094
	5.099	4.1231	21.2132	0.2174
	5.099	5.099	20.0998	0.2537
	6.0828	5.099	20.0998	0.2782
	4	5.099	20.0998	0.2263
	5.099	5	21.2132	0.238
	4.1231	4.1231	20.0998	0.2051
	5	5	21.095	0.237
	5	5.099	20.0998	0.2512
	5	6.0828	21.2132	0.2612
	5.099	4	20.0998	0.2263
	5.099	5	21.095	0.2394
	5	5.099	20.0998	0.2512
	5	6.0828	21.2132	0.2612
	5	5	20.0998	0.2488
	5.099	5	21.2132	0.238
	5.099	5.099	20.0998	0.2537
	5.099	5	21.095	0.2394
	5.099	5.099	20.025	0.2546
	5.099	6.0828	21.095	0.265
	5.099	5	20.0998	0.2512
	5	6	21.095	0.2607
	5.099	5.099	20.025	0.2546
	5.099	5.099	20.2237	0.2521
	4.1231	4.1231	20.025	0.2059
	5.099	5.099	20.0998	0.2537
	4	4	20.025	0.1998
	4.1231	5.099	20.0998	0.2294
	5	5	20.025	0.2497
	4.1231	5	20.0998	0.2269
	4.1231	4.1231	20.025	0.2059
	4	4	20.0998	0.199
	4	4.1231	20.0998	0.2021
	4.1231	4	20.0998	0.2021
	5	5	20.025	0.2497
	5	5.099	21.095	0.2394
	4	4	20.025	0.1998
	4.1231	4	21.095	0.1925
	5	4	21.0238	0.214
	4.1231	4	21.095	0.1925
	4	4	20.025	0.1998
	4	5	20.0998	0.2239
	5.099	5.099	20.0998	0.2537
	4	5	20.2237	0.2225
	4	4	20.0998	0.199
	4	5	21.095	0.2133
	5.099	5.099	19.105	0.2669
	4.1231	5	22.0907	0.2065
	4.1231	4	20.0998	0.2021
	5	4	21.2132	0.2121
	4	5.099	21.095	0.2157
	4.1231	5.099	21.095	0.2186
	4.1231	4.1231	20.0998	0.2051
	5.099	5.099	21.095	0.2417
	4	4	21.095	0.1896
	5.099	4	22.2036	0.2049
	4	5	21.095	0.2133
	5.099	5.099	21.2132	0.2404
	4	4.1231	21.095	0.1925
	4.1231	4	21.2132	0.1915
	4.1231	4.1231	21.095	0.1955
	4.1231	5	22.0907	0.2065
	4.1231	4.1231	21.095	0.1955
	5.099	4	21.095	0.2157
	4.1231	5.099	21.095	0.2186
	5.099	5.099	21.2132	0.2404
	4.1231	4	21.095	0.1925
	5.099	5.099	21.095	0.2417
	5	5	20.025	0.2497
	4	5	21.095	0.2133
	5.099	5.099	20.025	0.2546
	4	5	21.095	0.2133
	5	4	21.0238	0.214
	4	5	20.0998	0.2239
	5.099	5	20.025	0.2522
	6	5	21.095	0.2607
	5	5.099	21.095	0.2394
	5.099	5	22.2036	0.2274
	4	4.1231	21.0238	0.1932
	4.1231	5.099	21.2132	0.2174
	5.099	5.099	21.0238	0.2425
	4.1231	5	22.0907	0.2065
	3	3	21.0238	0.1427
	4.1231	3.1623	21.095	0.1727
	4	4	22.0227	0.1816
	3.1623	3	22.0907	0.1395
	5	5	22.0907	0.2263
	4.1231	4	22.0907	0.1839
	2	3	21.0238	0.1189
	3.1623	2	21.095	0.1224
	4	4	22.0227	0.1816
	4.1231	4	21.095	0.1925
	4	4.1231	21.0238	0.1932
	4	5	21.095	0.2133
	4	4	20.0998	0.199
	5	5	21.095	0.237
	4	4	21.095	0.1896
	4.1231	5	21.095	0.2162
	4	4	21.0238	0.1903
	4	4	20.0998	0.199
	5	5	20.025	0.2497
	5	5	21.095	0.237
	5	5	20.025	0.2497
	4	5	21.095	0.2133
	5	5.099	21.0238	0.2402
	5.099	6	21.095	0.2631
	5.099	5.099	21.0238	0.2425
	5	5	21.095	0.237
	5	4.1231	20.025	0.2278
	4	5	20.0998	0.2239
	5	4.1231	20.0998	0.2269
	5	5	20.2237	0.2472
	5	5	20.0998	0.2488
	5.099	5.099	21.2132	0.2404
	5	4	20.0998	0.2239
	5	5	21.2132	0.2357
	5.099	5.099	21.095	0.2417
	5.099	5	20.2237	0.2497
	5	5.099	21.095	0.2394
	5	5	21.2132	0.2357
	5	4	20.025	0.2247
	5.099	5.099	21.095	0.2417
	5	5.099	20.0998	0.2512
	6	5.099	21.2132	0.2616
	5	4.1231	21.0238	0.217
	5	5.099	21.095	0.2394
	5.099	4	21.0238	0.2164
	5	5	21.2132	0.2357
	5	4.1231	20.0998	0.2269
	5	5.099	21.2132	0.238
	5	5.099	21.0238	0.2402
	6.0828	5.099	21.095	0.265
	5.099	4.1231	21.0238	0.2193
	5.099	5.099	21.2132	0.2404
	4	4	20.025	0.1998
	5	5	21.2132	0.2357
	5.099	5	21.095	0.2394
	5.099	5.099	21.2132	0.2404
	4	4	22.0227	0.1816
	5.099	5	22.2036	0.2274
	4.1231	4.1231	21.095	0.1955
	5.099	5	22.2036	0.2274
	5	5.099	21.095	0.2394
	5.099	5	22.2036	0.2274
	4.1231	5.099	21.095	0.2186
	5.099	5	22.2036	0.2274
	4	4.1231	21.095	0.1925
	5.099	5.099	21.2132	0.2404
	4	4.1231	20.0998	0.2021
	5.099	5	21.2132	0.238
	4	4	20.025	0.1998
	5.099	5.099	21.095	0.2417
	5	4	20.0998	0.2239
	4.1231	5.099	21.2132	0.2174
	5.099	5	21.095	0.2394
	6.0828	6	21.095	0.2864
	5.099	5	20.025	0.2522
	5.099	6.0828	21.095	0.265
	5	5	20.0998	0.2488
	5	5	21.2132	0.2357
	5	6.0828	21.095	0.2627
	5.099	6.0828	21.2132	0.2636
	5	5	20.0998	0.2488
	5.099	6	21.2132	0.2616
	5.099	5	21.095	0.2394
	5.099	6.0828	21.2132	0.2636
	5	5	20.025	0.2497
	6.0828	6	21.095	0.2864
	4	6	20.0998	0.2488
	5	6.0828	21.2132	0.2612
	4	4	20.0998	0.199
	5.099	6.0828	21.2132	0.2636
	6	6.0828	21.095	0.2864
	5.099	6.0828	21.095	0.265
	5	5.099	21.095	0.2394
	5	6.0828	21.2132	0.2612
	6	6	20.0998	0.2985
	6.0828	6.0828	21.2132	0.2867
	5	4	20.025	0.2247
	5	5	21.2132	0.2357
	4	4	20.0998	0.199
	5	5	20.2237	0.2472
	4	4	21.095	0.1896
	4.1231	5	22.3607	0.204
	4	4.1231	21.095	0.1925
	5.099	4	22.2036	0.2049
	5	4	19.105	0.2355
	4.1231	5.099	21.095	0.2186
	4	4	21.095	0.1896
	4	5	21.095	0.2133
	4	4.1231	21.095	0.1925
	4	5	21.095	0.2133
	4	4	20.0998	0.199
	4.1231	5.099	21.095	0.2186
	4	4.1231	21.095	0.1925
	6	5.099	21.095	0.2631
	4	4.1231	20.0998	0.2021
	5.099	5.099	21.095	0.2417
	5	5.099	20.0998	0.2512
	5.099	5.099	21.095	0.2417
	4	4	20.0998	0.199
	5.099	5.099	21.095	0.2417
	4	4	20.0998	0.199
	5.099	5.099	21.095	0.2417
	4.1231	5.099	20.025	0.2303
	5.099	5.099	21.095	0.2417
	4	4	20.0998	0.199
	5.099	6.0828	21.2132	0.2636
	4	4.1231	20.0998	0.2021
	5.099	6.0828	21.095	0.265
	4.1231	4.1231	20.0998	0.2051
	5	5	21.095	0.237
	4.1231	4.1231	20.0998	0.2051
	5	5	20.2237	0.2472
	4	5.099	21.095	0.2157
	6	5	21.095	0.2607
	4	4	20.0998	0.199
	5	6	21.095	0.2607
	5	4	21.095	0.2133
	5	5.099	21.095	0.2394
	4.1231	5	20.0998	0.2269
	6.0828	5.099	21.095	0.265
	5.099	4	20.0998	0.2263
	5	5	21.095	0.237
	4	5.099	20.0998	0.2263
	5.099	5	20.0998	0.2512
	5	5	21.0238	0.2378
	6.0828	5.099	21.095	0.265
	5	5.099	21.0238	0.2402
	6.0828	5.099	21.095	0.265
	4	4	21.095	0.1896
	5	5	20.0998	0.2488
	4.1231	5	20.0998	0.2269
	5.099	5.099	20.0998	0.2537
	4	5	20.025	0.2247
	5	5	20.0998	0.2488
	5	5	21.0238	0.2378
	5.099	5.099	21.095	0.2417
	4	5	21.095	0.2133
	4.1231	5.099	21.095	0.2186
	5.099	5	21.0238	0.2402
	6	5	21.2132	0.2593
	5	5	21.0238	0.2378
	5.099	5.099	21.2132	0.2404
	5	5	21.095	0.237
	5.099	5	21.095	0.2394
	4	5	21.095	0.2133
	4.1231	5	21.2132	0.215
	5.099	5.099	20.025	0.2546
	5	5	21.095	0.237
	4	5.099	20.0998	0.2263
	4	4	20.2237	0.1978
	5	4.1231	20.025	0.2278
	5	4	20.2237	0.2225
	4	4	20.025	0.1998
	4.1231	4	21.2132	0.1915
	4.1231	4.1231	20.025	0.2059
	5	4	21.2132	0.2121
	5	4.1231	20.025	0.2278
	5.099	4.1231	21.2132	0.2174
	4	4.1231	20.025	0.2028
	5	5	21.095	0.237
	5	4.1231	21.0238	0.217
	6	5	21.095	0.2607
	4	4.1231	21.0238	0.1932
	5	5	21.2132	0.2357
	4	4	20.025	0.1998
	5	5	21.095	0.237
	4.1231	4.1231	20.0998	0.2051
	5	5	21.2132	0.2357
	4	4	20.025	0.1998
	4	5	21.095	0.2133
	5	5	21.0238	0.2378
	5	5.099	21.2132	0.238
	4	4.1231	21.095	0.1925
	4.1231	5	21.3776	0.2134
	4	4	21.0238	0.1903
	4.1231	5	22.2036	0.2054
	4	4	21.095	0.1896
	4.1231	5	21.2132	0.215
	5	5	21.0238	0.2378
	4	5	21.2132	0.2121
	4.1231	4.1231	21.0238	0.1961
	5	4	21.2132	0.2121
	4	4	21.0238	0.1903
	5.099	4	21.095	0.2157
	4.1231	4	20.025	0.2028
	4	4	20.2237	0.1978
	5.099	5.099	21.095	0.2417
	4	5	21.2132	0.2121
	4	4	20.025	0.1998
	4	5.099	20.0998	0.2263
	5	5	20.025	0.2497
	5	5	21.2132	0.2357
	4	4	20.025	0.1998
	4.1231	5	20.0998	0.2269
	4	4.1231	20.025	0.2028
	4	5	20.0998	0.2239
	5	5	20.0998	0.2488
	5.099	5	21.095	0.2394
	5	5	21.0238	0.2378
	4	5	21.095	0.2133
	4	4	20.025	0.1998
	4	5	21.095	0.2133
	5	5.099	21.095	0.2394
	6	5	20.2237	0.272
	4.1231	5	21.095	0.2162
	5.099	5.099	21.2132	0.2404
	4	5	20.025	0.2247
	5	5	21.2132	0.2357
	4	5.099	21.095	0.2157
	5	4	21.2132	0.2121
	4	4.1231	21.095	0.1925
	5	5.099	21.2132	0.238
	4	5.099	21.095	0.2157
	5	5.099	21.2132	0.238
	5	5.099	21.095	0.2394
	5.099	5.099	21.2132	0.2404
	5	4	21.095	0.2133
	5.099	5	21.095	0.2394
	5.099	5	20.0998	0.2512
	5.099	5	22.2036	0.2274
	5.099	5.099	20.0998	0.2537
	5.099	5	21.095	0.2394
	5	5	21.095	0.237
	6.0828	5.099	21.2132	0.2636
	5.099	5	20.0998	0.2512
	6	5	21.2132	0.2593
	4	5.099	21.095	0.2157
	5.099	6	20.2237	0.2744
	5	5	20.0998	0.2488
	6.0828	5	21.2132	0.2612
	5	5	20.0998	0.2488
	5.099	5.099	20.2237	0.2521
	4	5.099	20.0998	0.2263
	5.099	5	20.0998	0.2512
	5.099	5.099	20.0998	0.2537
	5	6	21.2132	0.2593
	5	5.099	20.0998	0.2512
	5.099	6	21.095	0.2631
	5	6.0828	21.095	0.2627
	5.099	6.0828	21.095	0.265
	5	5	20.025	0.2497
	5	5	20.2237	0.2472
	5	5	20.025	0.2497
	5	5	20.2237	0.2472
	5.099	5.099	21.0238	0.2425
	6	5	21.2132	0.2593
	5	5.099	21.095	0.2394
	5.099	5	20.0998	0.2512
	5	5.099	21.095	0.2394
	5	5	21.095	0.237
	5	5	21.095	0.237
	5	6.0828	21.095	0.2627
	5	6	20.0998	0.2736
	5.099	6	21.095	0.2631
	5.099	5	20.025	0.2522
	5	5.099	21.095	0.2394
	5.099	5	20.025	0.2522
	5.099	6.0828	21.095	0.265
	4.1231	4.1231	20.0998	0.2051
	5.099	5	20.0998	0.2512
	6	6.0828	20.0998	0.3006
	6	6.0828	21.095	0.2864
	5	5.099	20.025	0.2522
	6.0828	6	20.0998	0.3006
	5	5	21.0238	0.2378
	5.099	5.099	20.0998	0.2537
	5	5	21.095	0.237
	6.0828	5.099	20.2237	0.2765
	5	5.099	21.095	0.2394
	6.0828	6.0828	20.0998	0.3026
	5	4	20.025	0.2247
	5.099	5.099	20.0998	0.2537
	5	5.099	20.0998	0.2512
	5	6	20.0998	0.2736
	5	5.099	20.0998	0.2512
	6.0828	6	20.0998	0.3006
	5.099	5	20.0998	0.2512
	6.0828	5.099	20.0998	0.2782
	5	5	20.0998	0.2488
	5	5	20.0998	0.2488
	5	5.099	20.0998	0.2512
	5.099	6	20.2237	0.2744
	5.099	5	20.0998	0.2512
	6	6	21.095	0.2844
	5.099	5	20.0998	0.2512
	5.099	5	20.0998	0.2512
	5	5.099	21.095	0.2394
	6	6	20.0998	0.2985
	5.099	5	20.0998	0.2512
	5	5	20.0998	0.2488
	5	5	20.0998	0.2488
	5	5	20.025	0.2497
	5	5	20.0998	0.2488
	5.099	5	20.025	0.2522
	4	4	21.0238	0.1903
	5	4	20.025	0.2247
	4	5.099	21.2132	0.2145
	5.099	4	20.0998	0.2263
	3	2	20	0.125
	2	3	20	0.125
	2	3	20.025	0.1248
	3	3	20.025	0.1498
	3	3	21.0238	0.1427
	3	3	21.0238	0.1427
	3	2	20.0998	0.1244
	3	3	21.0238	0.1427
	3	3	19.0263	0.1577
	3.1623	4	20.025	0.1788
	3	3.1623	20.0998	0.1533
	3.1623	3	20.0998	0.1533
	3	3	21.095	0.1422
	3	4	21.095	0.1659
	3	3	20.025	0.1498
	3.1623	4	21.0238	0.1703
	3	3.1623	20.0998	0.1533
	4	4	20.025	0.1998
	4.1231	4.1231	21.0238	0.1961
	3.1623	3.1623	21.095	0.1499
	4	4	20.025	0.1998
	4.1231	4	21.095	0.1925
	4	4	20.025	0.1998
	4.1231	5	20.0998	0.2269
	4	4.1231	20.0998	0.2021
	4.1231	4	20.025	0.2028
	3	3	20.025	0.1498
	4	4	20.0998	0.199
	3	3	19.0263	0.1577
	4.1231	4	20.0998	0.2021
	4	4	20.0998	0.199
	4.1231	4.1231	20.0998	0.2051
	4	4	19.0263	0.2102
	4	5	20.0998	0.2239
	4	4	20.025	0.1998
	3.1623	3	20.0998	0.1533
	3	3	21.0238	0.1427
	5.099	5	20.0998	0.2512
	4	4	20.025	0.1998
	4.1231	4	19.0263	0.2135
	4	4	20.025	0.1998
	4	4	20.025	0.1998
	4	4	20.0998	0.199
	5.099	5	19.105	0.2643
	4	4.1231	20.025	0.2028
	4.1231	4	19.105	0.2126
	4.1231	4.1231	20.0998	0.2051
	5	5	20.2237	0.2472
	5	5.099	20.025	0.2522
	5.099	6.0828	20.0998	0.2782
	5	5	19.105	0.2617
	5.099	6	20.0998	0.2761
	4	5	19.105	0.2355
	5	5	20.0998	0.2488
	5.099	5.099	20.0998	0.2537
	5	5	20.0998	0.2488
	4.1231	4.1231	20.0998	0.2051
	4	4.1231	20.0998	0.2021
	5	5.099	20.0998	0.2512
	5.099	5.099	20.0998	0.2537
	4	4	20.025	0.1998
	5.099	5	19.2354	0.2625
	4	5	20.025	0.2247
	5	5.099	20.0998	0.2512
	4	4	19.105	0.2094
	4	5	20.0998	0.2239
	4	5.099	20.0998	0.2263
	5	5.099	20.0998	0.2512
	4	4	20.0998	0.199
	5	5	20.0998	0.2488
	4.1231	5.099	20.0998	0.2294
	5.099	5.099	20.2237	0.2521
	4	4.1231	19.105	0.2126
	5	5	20.2237	0.2472
	4.1231	5.099	20.0998	0.2294
	4	5.099	20.0998	0.2263
	4	4	19.105	0.2094
	5.099	5	20.0998	0.2512
	4	4.1231	20.025	0.2028
	5	5	20.0998	0.2488
	4	4	20.0998	0.199
	5.099	5	19.0263	0.2654
	4	4.1231	20.025	0.2028
	4.1231	5	19.105	0.2388
	4.1231	4	20.025	0.2028
	5.099	5	19.105	0.2643
	4	5	20.0998	0.2239
	5.099	5.099	21.095	0.2417
	4	4	20.0998	0.199
	5.099	5	20.025	0.2522
	4.1231	4	19.0263	0.2135
	5	5	20.025	0.2497
	5	5	20.025	0.2497
	4	5	20.025	0.2247
	4	4	19.0263	0.2102
	5.099	5	20.025	0.2522
	4	4	19.105	0.2094
	5	5.099	20.0998	0.2512
	4	4	19.105	0.2094
	5	5	20.0998	0.2488
	4	4	20.0998	0.199
	5	4	20.0998	0.2239
	5	5	20.0998	0.2488
	5	5	20.0998	0.2488
	4.1231	4	20.025	0.2028
	4	4	20.0998	0.199
	5	5.099	20.0998	0.2512
	5.099	5	20.0998	0.2512
	4	4.1231	20.0998	0.2021
	5	5	20.0998	0.2488
	4	5	20.0998	0.2239
	4.1231	4	20.0998	0.2021
	3	4.1231	20.025	0.1779
	4	4	19.105	0.2094
	4	4.1231	21.095	0.1925
	4	5	21.2132	0.2121
	4.1231	4.1231	20.025	0.2059
	4	4.1231	20.0998	0.2021
	4	4.1231	21.0238	0.1932
	4	4	20.0998	0.199
	4	4	20.025	0.1998
	4.1231	4	21.095	0.1925
	3	5	20.025	0.1998
	4	4	20.0998	0.199
	4	5.099	20.025	0.2272
	4.1231	4	21.095	0.1925
	5	5	20.025	0.2497
	5.099	5	20.0998	0.2512
	3	5	19.0263	0.2102
	5.099	4	20.025	0.2272
	4.1231	4.1231	21.0238	0.1961
	5.099	4	21.095	0.2157
	4.1231	4.1231	20.025	0.2059
	4	4	20.0998	0.199
	4	5	20.025	0.2247
	4	4	21.095	0.1896
	5	4	20.025	0.2247
	4.1231	4.1231	21.095	0.1955
	4	4	20.025	0.1998
	4	4	21.095	0.1896
	4	4.1231	21.0238	0.1932
	5	5	21.095	0.237
	4	4.1231	21.0238	0.1932
	5	5	21.095	0.237
	4	4	20.025	0.1998
	4.1231	4.1231	21.095	0.1955
	5	5	20.025	0.2497
	4.1231	5	21.095	0.2162
	5	5.099	20.025	0.2522
	4	4	20.0998	0.199
	4	4	20.025	0.1998
	4	4	20.0998	0.199
	4	4.1231	20.025	0.2028
	4	4	20.0998	0.199
	4	4	20.0998	0.199
	4	4	21.095	0.1896
	4	4	21.095	0.1896
	4	5	21.095	0.2133
	4	4	20.0998	0.199
	5	5	20.0998	0.2488
	4	4.1231	21.095	0.1925
	4.1231	5	21.095	0.2162
	5	5	21.0238	0.2378
	4	5	21.095	0.2133
	4	5	20.0998	0.2239
	4	4.1231	21.095	0.1925
	4	4	20.0998	0.199
	5.099	5	21.095	0.2394
	5	4	21.0238	0.214
	4	5	21.0238	0.214
	4	5	20.0998	0.2239
	4	5	20.0998	0.2239
	4	4	21.0238	0.1903
	5.099	4	22.0907	0.2059
	5	5	20.0998	0.2488
	6	5	20.0998	0.2736
	4.1231	4.1231	21.095	0.1955
	4	4	21.2132	0.1886
	3	3.1623	21.095	0.1461
	4.1231	4	22.0227	0.1844
	3	3.1623	21.095	0.1461
	3	3	22.0227	0.1362
	3	3.1623	23.0868	0.1335
	3.1623	3	23.0868	0.1335
	3	3	22.0227	0.1362
	4	4	22.0907	0.1811
	4	4	21.0238	0.1903
	4	4	21.095	0.1896
	5	5	20.0998	0.2488
	6	5.099	20.2237	0.2744
	4	5.099	20.0998	0.2263
	5.099	5.099	21.2132	0.2404
	4	5	20.0998	0.2239
	5.099	5.099	21.2132	0.2404
	5	5	20.0998	0.2488
	5	5	21.095	0.237
	4	4	20.0998	0.199
	5.099	4.1231	21.2132	0.2174
	5	5.099	20.0998	0.2512
	5.099	5	21.2132	0.238
	5	5	21.095	0.237
	5.099	6	22.3607	0.2482
	5	6	20.2237	0.272
	5	5.099	20.0998	0.2512
	5.099	5.099	20.0998	0.2537
	5	5	21.095	0.237
	5	5	19.105	0.2617
	5.099	5.099	20.0998	0.2537
	5	5	20.0998	0.2488
	6.0828	5.099	20.2237	0.2765
	6.0828	6.0828	20.0998	0.3026
	6.0828	5.099	20.2237	0.2765
	5	6	19.105	0.2879
	6	6.0828	20.0998	0.3006
	5.099	5.099	19.105	0.2669
	6.0828	6	21.2132	0.2848
	5.099	5	20.025	0.2522
	5	5	21.2132	0.2357
	6.0828	6.0828	20.025	0.3038
	6.0828	6	21.2132	0.2848
	6.0828	6.0828	20.0998	0.3026
	6.0828	6	21.095	0.2864
	5.099	6.0828	19.0263	0.2939
	6.0828	6	21.095	0.2864
	6	6	20.025	0.2996
	6.0828	6.0828	21.2132	0.2867
	5	6	20.025	0.2747
	5.099	6.0828	21.2132	0.2636
	5	5	20.0998	0.2488
	6	6	21.2132	0.2828
	5	5.099	20.0998	0.2512
	6.0828	6	21.2132	0.2848
	6	5	20.025	0.2747
	6.0828	6	21.2132	0.2848
	5	6	20.025	0.2747
	5	6.0828	20.0998	0.2757
	5	5	19.0263	0.2628
	6	6.0828	20.0998	0.3006
	6.0828	6.0828	20.0998	0.3026
	5.099	6.0828	20.2237	0.2765
	6	6	21.095	0.2844
	6.0828	6.0828	21.3776	0.2845
	5.099	6.0828	20.2237	0.2765
	5.099	6.0828	21.2132	0.2636
	6.0828	6.0828	20.025	0.3038
	6.0828	6.0828	20.2237	0.3008
	6.0828	6.0828	20.025	0.3038
	5.099	6.0828	21.2132	0.2636
	6	6	20.025	0.2996
	6	5	21.2132	0.2593
	4	5	19.105	0.2355
	5.099	5.099	20.2237	0.2521
	5	6	21.095	0.2607
	5.099	6	21.2132	0.2616
	5	5.099	20.025	0.2522
	5.099	6	21.095	0.2631
	5	5.099	20.025	0.2522
	5.099	6.0828	21.095	0.265
	5	5	21.0238	0.2378
	5.099	6	21.095	0.2631
	5	5	19.0263	0.2628
	6	6.0828	20.0998	0.3006
	6.0828	5.099	20.0998	0.2782
	5.099	6.0828	20.2237	0.2765
	6	6	20.0998	0.2985
	6	6.0828	22.2036	0.2721
	5	5.099	20.0998	0.2512
	6.0828	6	21.2132	0.2848
	5	6.0828	20.0998	0.2757
	5.099	6.0828	20.0998	0.2782
	5	5	20.0998	0.2488
	6.0828	6	21.095	0.2864
	6	6	20.025	0.2996
	5.099	6	21.095	0.2631
	6.0828	6.0828	20.025	0.3038
	6.0828	5	21.2132	0.2612
	6.0828	6	20.025	0.3017
	6	6.0828	22.2036	0.2721
	5.099	6.0828	20.0998	0.2782
	6.0828	5.099	21.2132	0.2636
	6	6.0828	20.0998	0.3006
	6.0828	6.0828	21.2132	0.2867
	6.0828	6.0828	20.0998	0.3026
	6.0828	6	22.2036	0.2721
	6	6	20.025	0.2996
	6.0828	6.0828	21.2132	0.2867
	5	5	19.105	0.2617
	5	6	21.2132	0.2593
	5	5	19.105	0.2617
	6	6	21.2132	0.2828
	5	5	19.105	0.2617
	6.0828	6	21.2132	0.2848
	5	5	19.105	0.2617
	6	6	20.2237	0.2967
	5	5.099	19.105	0.2643
	5.099	5.099	20.2237	0.2521
	5	5	19.105	0.2617
	6.0828	6	21.2132	0.2848
	5	5	20.0998	0.2488
	6.0828	5	22.2036	0.2496
	5	5.099	19.105	0.2643
	5.099	6.0828	20.0998	0.2782
	5	5	20.025	0.2497
	5.099	5.099	21.2132	0.2404
	5	5.099	20.025	0.2522
	5	5	21.095	0.237
	5	5	19.105	0.2617
	6.0828	5.099	20.2237	0.2765
	5.099	5.099	19.105	0.2669
	5.099	6	21.095	0.2631
	5	5.099	19.105	0.2643
	5.099	6.0828	20.0998	0.2782
	5	5	19.105	0.2617
	5.099	6	20.0998	0.2761
	5	5	19.105	0.2617
	5.099	6.0828	20.2237	0.2765
	5	5	19.105	0.2617
	6	5	21.095	0.2607
	5	5	19.105	0.2617
	5.099	6.0828	20.2237	0.2765
	6	6.0828	19.105	0.3162
	5	6	21.095	0.2607
	6	6.0828	19.0263	0.3175
	5.099	6.0828	20.0998	0.2782
	5	5	20.0998	0.2488
	5	6	21.095	0.2607
	5	5	20.025	0.2497
	5	6	20.0998	0.2736
	5	5	20.0998	0.2488
	5	5	21.2132	0.2357
	5	5	20.025	0.2497
	6.0828	6.0828	20.0998	0.3026
	5.099	6.0828	20.025	0.2792
	6.0828	6.0828	20.2237	0.3008
	6	6	19.0263	0.3154
	5	6	21.095	0.2607
	5	5	20.025	0.2497
	5	5	21.2132	0.2357
	4	5	20.025	0.2247
	4	5	20.0998	0.2239
	5.099	5.099	20.025	0.2546
	6.0828	6.0828	20.2237	0.3008
	5	5	19.0263	0.2628
	5	5	20.0998	0.2488
	5	6.0828	19.105	0.29
	5.099	5.099	20.0998	0.2537
	5	6	19.105	0.2879
	6.0828	6	20.0998	0.3006
	5	5	19.0263	0.2628
	5	5	21.095	0.237
	5	5	20.025	0.2497
	5	5	20.0998	0.2488
	5	5	19.105	0.2617
	5.099	5.099	20.2237	0.2521
	4	5	20.0998	0.2239
	5.099	5	20.0998	0.2512
	5	5	19.0263	0.2628
	5.099	6	20.0998	0.2761
	4	5	19.105	0.2355
	5.099	5.099	20.0998	0.2537
	5	5	19.105	0.2617
	5.099	5	20.2237	0.2497
	5	5	20.025	0.2497
	5.099	6.0828	21.095	0.265
	5	5	20.025	0.2497
	5.099	5	20.0998	0.2512
	5	5	19.0263	0.2628
	5.099	6.0828	21.095	0.265
	5	5	20.025	0.2497
	5	6	20.0998	0.2736
	5.099	5.099	20.0998	0.2537
	5.099	6.0828	20.0998	0.2782
	5	5	20.025	0.2497
	5	6.0828	22.2036	0.2496
	5	5	19.0263	0.2628
	5	6	21.095	0.2607
	5	5.099	19.0263	0.2654
	5	6	21.095	0.2607
	5	5	19.0263	0.2628
	6.0828	5.099	20.2237	0.2765
	5	5	20.0998	0.2488
	5.099	5	21.2132	0.238
	5	5	20.025	0.2497
	5.099	5.099	21.095	0.2417
	5	6	21.095	0.2607
	5.099	5.099	21.2132	0.2404
	5	5	21.095	0.237
	5	5	20.2237	0.2472
	4.1231	4.1231	20.0998	0.2051
	5.099	5.099	20.2237	0.2521
	5	5.099	20.0998	0.2512
	5	5	21.095	0.237
	5	5	19.0263	0.2628
	5.099	5	20.0998	0.2512
	5	5	20.025	0.2497
	5.099	5	20.0998	0.2512
	5	5.099	20.025	0.2522
	5	5	20.0998	0.2488
	5	5	21.0238	0.2378
	5.099	5.099	20.2237	0.2521
	5	5	19.0263	0.2628
	5	5	20.0998	0.2488
	5	5	20.0998	0.2488
	5.099	5.099	20.0998	0.2537
	4	5	19.105	0.2355
	5.099	5.099	20.0998	0.2537
	5	6	19.105	0.2879
	5	5	20.0998	0.2488
	5	5	19.105	0.2617
	6.0828	6.0828	20.0998	0.3026
	5	5	20.0998	0.2488
	5.099	5	21.2132	0.238
	5	5	20.0998	0.2488
	5.099	5.099	21.2132	0.2404
	5	5	19.105	0.2617
	5	5	20.0998	0.2488
	5.099	5.099	19.0263	0.268
	5.099	6.0828	21.095	0.265
	6	6	20.025	0.2996
	5.099	6	21.2132	0.2616
	5.099	6.0828	19.0263	0.2939
	5.099	5.099	20.0998	0.2537
	6	5	20.025	0.2747
	5.099	5	21.095	0.2394
	6	6	19.0263	0.3154
	5.099	5.099	19.105	0.2669
	6	6.0828	19.0263	0.3175
	5.099	6.0828	21.095	0.265
	5	5	19.0263	0.2628
	5.099	5	21.095	0.2394
	6	5	19.0263	0.2891
	5.099	6	20.0998	0.2761
	6	5.099	19.0263	0.2917
	5.099	6	20.0998	0.2761
	6	5	19.105	0.2879
	5.099	6	19.2354	0.2885
	6	6	19.0263	0.3154
	6.0828	6	19.105	0.3162
	6	6	19.0263	0.3154
	5	6	20.2237	0.272
	6	6.0828	19.105	0.3162
	6	6	20.0998	0.2985
	6	6	20.025	0.2996
	7.0711	6.0828	20.2237	0.3252
	6.0828	6	20.025	0.3017
	6.0828	6	20.0998	0.3006
	6	6	19.0263	0.3154
	5	6	20.2237	0.272
	6.0828	6.0828	19.105	0.3184
	6.0828	5.099	21.095	0.265
	5	5	20.025	0.2497
	5.099	5	20.0998	0.2512
	4	3	20.025	0.1748
	3	3	20.025	0.1498
	3.1623	2.2361	21.0238	0.1284
	2	2	21.0238	0.0951
	2.2361	2	19	0.1115
	2	2	21.0238	0.0951
	2	3	21.0238	0.1189
	3.1623	3	21.095	0.1461
	3	3	20.025	0.1498
	3.1623	3	20.0998	0.1533
	4	3.1623	20.025	0.1788
	4.1231	4	21.0238	0.1932
	4	4.1231	20.0998	0.2021
	4.1231	4.1231	20.0998	0.2051
	4	4.1231	20.025	0.2028
	5.099	5	20.0998	0.2512
	4	5	20.0998	0.2239
	5.099	5.099	21.2132	0.2404
	5	5	20.0998	0.2488
	4.1231	5	21.095	0.2162
	4	4.1231	20.0998	0.2021
	4	4	22.2036	0.1802
	4	4.1231	21.095	0.1925
	5.099	5	23.1948	0.2177
	5	5	19.0263	0.2628
	4.1231	5.099	20.0998	0.2294
	4	4.1231	20.025	0.2028
	4.1231	5	21.095	0.2162
	4	4	20.0998	0.199
	4.1231	5	21.095	0.2162
	4	4	20.025	0.1998
	4.1231	5	22.2036	0.2054
	4	6	19.105	0.2617
	5.099	5.099	20.2237	0.2521
	5	5	19.0263	0.2628
	5.099	5.099	20.2237	0.2521
	4	4.1231	19.0263	0.2135
	5.099	5.099	21.2132	0.2404
	5	4	20.025	0.2247
	5.099	5	21.2132	0.238
	5.099	5.099	20.0998	0.2537
	5.099	5.099	22.2036	0.2296
	5	4	20.0998	0.2239
	6.0828	5.099	21.2132	0.2636
	5	5	20.0998	0.2488
	6.0828	5	21.2132	0.2612
	5.099	5.099	20.0998	0.2537
	6.0828	5.099	22.3607	0.25
	5	5	19.105	0.2617
	5.099	5.099	22.2036	0.2296
	4	4	20.025	0.1998
	4.4721	5.099	21.2132	0.2256
	4	4.1231	19.0263	0.2135
	4.1231	5.099	21.2132	0.2174
	4.1231	4	19.0263	0.2135
	5.099	5.099	21.2132	0.2404
	4	4	19.0263	0.2102
	5.099	5.099	20.2237	0.2521
	4	4	19.105	0.2094
	5.099	5	21.2132	0.238
	5	4	19.0263	0.2365
	5.099	5	21.2132	0.238
	5.099	5	18.1108	0.2788
	6.0828	5.099	20.2237	0.2765
	5	5.099	18.0278	0.2801
	5.099	5.099	21.2132	0.2404
	5	5.099	19.105	0.2643
	6.0828	5.099	20.2237	0.2765
	5	5.099	19.0263	0.2654
	6.0828	5.099	21.2132	0.2636
	5	4	18.0278	0.2496
	5.099	5	20.0998	0.2512
	5	5.099	19.105	0.2643
	6.0828	6.0828	20.2237	0.3008
	4	4.1231	18.0278	0.2253
	5.099	5.099	21.2132	0.2404
	4	4	18.0278	0.2219
	5.099	4	20.0998	0.2263
	5	5	19.0263	0.2628
	5.099	5.099	21.2132	0.2404
	4	4.1231	19.0263	0.2135
	5.099	6	19.105	0.2905
	5	5	20.025	0.2497
	5.099	5	21.095	0.2394
	5	5	20.025	0.2497
	6.0828	5.099	20.0998	0.2782
	5.099	5	20.025	0.2522
	6.0828	5.099	21.2132	0.2636
	5	5	20	0.25
	6.0828	5.3852	21.587	0.2656
	5	6	19.0263	0.2891
	6.3246	5.099	20.2237	0.2824
	5.099	6.0828	20.025	0.2792
	6.0828	5.099	21.2132	0.2636
	5	4	20.025	0.2247
	4.4721	5.099	21.2132	0.2256
	5	4.1231	19.0263	0.2397
	5.099	5.099	20.2237	0.2521
	5	4	20.025	0.2247
[truncated: 8,393 more rows]

## Sheet: analisis
talkingFace Dataset
[truncated: 31 more rows]

[truncated: 1 more sheets: Sheet1]
