# Supplementary material for: Adjusting eye aspect ratio for strong eye blink detection based on facial landmarks
Source: PeerJ Comput Sci. 2022 Apr 18;8:e943. doi: 10.7717/peerj-cs.943 (PMC9044337; doi:10.7717/peerj-cs.943)
Supplement: Supplemental Information 8 [file peerj-cs-08-943-s008.vsdx]

Archive with 26 entries (26 files):
- [Content_Types].xml
- _rels/.rels
- visio/document.xml
- visio/masters/masters.xml
- visio/pages/pages.xml
- visio/_rels/document.xml.rels
- visio/masters/_rels/masters.xml.rels
- visio/pages/_rels/pages.xml.rels
- visio/masters/master1.xml
- visio/masters/master2.xml
- visio/masters/master3.xml
- visio/masters/master4.xml
- visio/masters/master5.xml
- visio/masters/master6.xml
- visio/masters/master7.xml
- visio/pages/page1.xml
- visio/pages/page2.xml
- visio/pages/_rels/page1.xml.rels
- visio/pages/_rels/page2.xml.rels
- visio/windows.xml
- visio/theme/theme1.xml
- docProps/thumbnail.emf
- visio/validation.xml
- docProps/core.xml
- docProps/app.xml
- docProps/custom.xml
