# Supplementary material for: Adjusting eye aspect ratio for strong eye blink detection based on facial landmarks
Source: PeerJ Comput Sci. 2022 Apr 18;8:e943. doi: 10.7717/peerj-cs.943 (PMC9044337; doi:10.7717/peerj-cs.943)
Supplement: Supplemental Information 8 [file peerj-cs-08-943-s008.vsdx › [Content_Types].xml]

<?xml version="1.0" encoding="UTF-8" standalone="yes"?>
<Types xmlns="http://schemas.openxmlformats.org/package/2006/content-types"><Default Extension="emf" ContentType="image/x-emf"/><Default Extension="rels" ContentType="application/vnd.openxmlformats-package.relationships+xml"/><Default Extension="xml" ContentType="application/xml"/><Override PartName="/visio/document.xml" ContentType="application/vnd.ms-visio.drawing.main+xml"/><Override PartName="/visio/masters/masters.xml" ContentType="application/vnd.ms-visio.masters+xml"/><Override PartName="/visio/masters/master1.xml" ContentType="application/vnd.ms-visio.master+xml"/><Override PartName="/visio/masters/master2.xml" ContentType="application/vnd.ms-visio.master+xml"/><Override PartName="/visio/masters/master3.xml" ContentType="application/vnd.ms-visio.master+xml"/><Override PartName="/visio/masters/master4.xml" ContentType="application/vnd.ms-visio.master+xml"/><Override PartName="/visio/masters/master5.xml" ContentType="application/vnd.ms-visio.master+xml"/><Override PartName="/visio/masters/master6.xml" ContentType="application/vnd.ms-visio.master+xml"/><Override PartName="/visio/masters/master7.xml" ContentType="application/vnd.ms-visio.master+xml"/><Override PartName="/visio/pages/pages.xml" ContentType="application/vnd.ms-visio.pages+xml"/><Override PartName="/visio/pages/page1.xml" ContentType="application/vnd.ms-visio.page+xml"/><Override PartName="/visio/pages/page2.xml" ContentType="application/vnd.ms-visio.page+xml"/><Override PartName="/visio/windows.xml" ContentType="application/vnd.ms-visio.windows+xml"/><Override PartName="/visio/validation.xml" ContentType="application/vnd.ms-visio.validation+xml"/><Override PartName="/visio/theme/theme1.xml" ContentType="application/vnd.openxmlformats-officedocument.theme+xml"/><Override PartName="/docProps/core.xml" ContentType="application/vnd.openxmlformats-package.core-properties+xml"/><Override PartName="/docProps/app.xml" ContentType="application/vnd.openxmlformats-officedocument.extended-properties+xml"/><Override PartName="/docProps/custom.xml" ContentType="application/vnd.openxmlformats-officedocument.custom-properties+xml"/></Types>
