# Supplementary material for: Adjusting eye aspect ratio for strong eye blink detection based on facial landmarks
Source: PeerJ Comput Sci. 2022 Apr 18;8:e943. doi: 10.7717/peerj-cs.943 (PMC9044337; doi:10.7717/peerj-cs.943)
Supplement: Supplemental Information 8 [file peerj-cs-08-943-s008.vsdx › docProps/app.xml]

<?xml version="1.0" encoding="UTF-8" standalone="yes"?>
<Properties xmlns="http://schemas.openxmlformats.org/officeDocument/2006/extended-properties" xmlns:vt="http://schemas.openxmlformats.org/officeDocument/2006/docPropsVTypes"><Template>C:\Program Files\Microsoft Office\root\Office16\visio content\1033\VERTICALFLOWCHART_U.vstx</Template><Application>Microsoft Visio</Application><ScaleCrop>false</ScaleCrop><HeadingPairs><vt:vector size="4" baseType="variant"><vt:variant><vt:lpstr>Pages</vt:lpstr></vt:variant><vt:variant><vt:i4>2</vt:i4></vt:variant><vt:variant><vt:lpstr>Masters</vt:lpstr></vt:variant><vt:variant><vt:i4>7</vt:i4></vt:variant></vt:vector></HeadingPairs><TitlesOfParts><vt:vector size="9" baseType="lpstr"><vt:lpstr>Page-1</vt:lpstr><vt:lpstr>VBackground-1</vt:lpstr><vt:lpstr>Dynamic connector</vt:lpstr><vt:lpstr>Rounded Rectangle</vt:lpstr><vt:lpstr>Start/End.10</vt:lpstr><vt:lpstr>Data.11</vt:lpstr><vt:lpstr>Decision.12</vt:lpstr><vt:lpstr>Process.13</vt:lpstr><vt:lpstr>Center Gradient</vt:lpstr></vt:vector></TitlesOfParts><Manager></Manager><Company></Company><LinksUpToDate>false</LinksUpToDate><SharedDoc>false</SharedDoc><HyperlinkBase></HyperlinkBase><HyperlinksChanged>false</HyperlinksChanged><AppVersion>16.0000</AppVersion></Properties>
