# Supplementary material for: Adjusting eye aspect ratio for strong eye blink detection based on facial landmarks
Source: PeerJ Comput Sci. 2022 Apr 18;8:e943. doi: 10.7717/peerj-cs.943 (PMC9044337; doi:10.7717/peerj-cs.943)
Supplement: Supplemental Information 8 [file peerj-cs-08-943-s008.vsdx › visio/document.xml]

<?xml version='1.0' encoding='utf-8' ?>
<VisioDocument xmlns='http://schemas.microsoft.com/office/visio/2012/main' xmlns:r='http://schemas.openxmlformats.org/officeDocument/2006/relationships' xml:space='preserve'><DocumentSettings TopPage='0' DefaultTextStyle='7' DefaultLineStyle='7' DefaultFillStyle='7' DefaultGuideStyle='4'><GlueSettings>9</GlueSettings><SnapSettings>295</SnapSettings><SnapExtensions>34</SnapExtensions><SnapAngles/><DynamicGridEnabled>1</DynamicGridEnabled><ProtectStyles>0</ProtectStyles><ProtectShapes>0</ProtectShapes><ProtectMasters>0</ProtectMasters><ProtectBkgnds>0</ProtectBkgnds></DocumentSettings><Colors><ColorEntry IX='24' RGB='#7F7F7F'/><ColorEntry IX='25' RGB='#000000'/><ColorEntry IX='26' RGB='#FFFFFF'/><ColorEntry IX='27' RGB='#4D4D4D'/><ColorEntry IX='28' RGB='#1BA1E2'/><ColorEntry IX='29' RGB='#F2F2F2'/><ColorEntry IX='30' RGB='#C0C0C0'/><ColorEntry IX='31' RGB='#A2A2A2'/><ColorEntry IX='32' RGB='#595959'/><ColorEntry IX='33' RGB='#BCBCBC'/><ColorEntry IX='34' RGB='#CDCDCD'/><ColorEntry IX='35' RGB='#5C5C5C'/><ColorEntry IX='36' RGB='#FEF1DE'/><ColorEntry IX='37' RGB='#735E2D'/><ColorEntry IX='38' RGB='#E6F7E6'/><ColorEntry IX='39' RGB='#5B9BD5'/><ColorEntry IX='40' RGB='#41719C'/><ColorEntry IX='41' RGB='#FEFFFF'/><ColorEntry IX='42' RGB='#C8C8C8'/><ColorEntry IX='43' RGB='#A7A7A7'/><ColorEntry IX='44' RGB='#B4B4B4'/><ColorEntry IX='45' RGB='#4987BF'/><ColorEntry IX='46' RGB='#4F88BB'/><ColorEntry IX='47' RGB='#1998D6'/><ColorEntry IX='48' RGB='#4798C0'/><ColorEntry IX='49' RGB='#1176A7'/><ColorEntry IX='50' RGB='#D80073'/><ColorEntry IX='51' RGB='#F09609'/><ColorEntry IX='52' RGB='#E9ECF3'/><ColorEntry IX='53' RGB='#BFBFBF'/><ColorEntry IX='54' RGB='#F2F8FD'/><ColorEntry IX='55' RGB='#C05046'/><ColorEntry IX='56' RGB='#EBC8C5'/><ColorEntry IX='57' RGB='#B1DFF5'/><ColorEntry IX='58' RGB='#EEF4FD'/><ColorEntry IX='59' RGB='#604878'/><ColorEntry IX='60' RGB='#EAEAEA'/><ColorEntry IX='61' RGB='#B8B8B8'/><ColorEntry IX='62' RGB='#CBFFFF'/><ColorEntry IX='63' RGB='#68FFFF'/><ColorEntry IX='64' RGB='#CCECFF'/><ColorEntry IX='65' RGB='#68C7FF'/><ColorEntry IX='66' RGB='#CCFFFF'/><ColorEntry IX='67' RGB='#636363'/><ColorEntry IX='68' RGB='#E9E9E9'/><ColorEntry IX='69' RGB='#656565'/><ColorEntry IX='70' RGB='#E2E2E2'/><ColorEntry IX='71' RGB='#767676'/><ColorEntry IX='72' RGB='#E8E8E8'/><ColorEntry IX='73' RGB='#EDEDED'/><ColorEntry IX='74' RGB='#C1E8FF'/><ColorEntry IX='75' RGB='#D1D1D1'/><ColorEntry IX='76' RGB='#14759A'/><ColorEntry IX='77' RGB='#0F5A76'/><ColorEntry IX='78' RGB='#E7F1FA'/><ColorEntry IX='79' RGB='#E7EDF3'/><ColorEntry IX='80' RGB='#0083B9'/><ColorEntry IX='81' RGB='#969696'/><ColorEntry IX='82' RGB='#13A7FF'/><ColorEntry IX='83' RGB='#1CADE4'/><ColorEntry IX='84' RGB='#0097E0'/><ColorEntry IX='85' RGB='#D1ECF9'/><ColorEntry IX='86' RGB='#79C8EE'/><ColorEntry IX='87' RGB='#A3D9F4'/><ColorEntry IX='88' RGB='#4AB6EA'/><ColorEntry IX='89' RGB='#D2ECF9'/><ColorEntry IX='90' RGB='#E7F5FC'/><ColorEntry IX='91' RGB='#91BAB2'/><ColorEntry IX='92' RGB='#ECECEC'/><ColorEntry IX='93' RGB='#EB5504'/><ColorEntry IX='94' RGB='#F2DCDA'/><ColorEntry IX='95' RGB='#F1DCDA'/><ColorEntry IX='96' RGB='#1D4D77'/><ColorEntry IX='97' RGB='#8FBAE1'/><ColorEntry IX='98' RGB='#2D74B4'/><ColorEntry IX='99' RGB='#2196FF'/><ColorEntry IX='100' RGB='#3F3F3F'/><ColorEntry IX='101' RGB='#1F1F1F'/><ColorEntry IX='102' RGB='#3E3E3E'/><ColorEntry IX='103' RGB='#FEBF01'/><ColorEntry IX='104' RGB='#8D6B01'/><ColorEntry IX='105' RGB='#A5A5A5'/><ColorEntry IX='106' RGB='#257CA7'/><ColorEntry IX='107' RGB='#CCE7F3'/><ColorEntry IX='108' RGB='#CBE8F3'/><ColorEntry IX='109' RGB='#EC7D32'/><ColorEntry IX='110' RGB='#0172C5'/><ColorEntry IX='111' RGB='#01406E'/><ColorEntry IX='112' RGB='#73ACD9'/><ColorEntry IX='113' RGB='#EBF3FA'/><ColorEntry IX='114' RGB='#2495CF'/><ColorEntry IX='115' RGB='#D1EAF7'/><ColorEntry IX='116' RGB='#BCE0F3'/><ColorEntry IX='117' RGB='#D1EAF8'/><ColorEntry IX='118' RGB='#D8EDF8'/><ColorEntry IX='119' RGB='#478ABF'/><ColorEntry IX='120' RGB='#96AFCF'/><ColorEntry IX='121' RGB='#BFCEE1'/><ColorEntry IX='122' RGB='#F5E3E2'/><ColorEntry IX='123' RGB='#E2B1AD'/></Colors><FaceNames><FaceName NameU='Calibri' UnicodeRanges='-469750017 -1073732485 9 0' CharSets='536871423 0' Panose='2 15 5 2 2 2 4 3 2 4' Flags='325'/></FaceNames><StyleSheets><StyleSheet ID='0' NameU='No Style' IsCustomNameU='1' Name='No Style' IsCustomName='1'><Cell N='EnableLineProps' V='1'/><Cell N='EnableFillProps' V='1'/><Cell N='EnableTextProps' V='1'/><Cell N='HideForApply' V='0'/><Cell N='LineWeight' V='0.01041666666666667'/><Cell N='LineColor' V='0'/><Cell N='LinePattern' V='1'/><Cell N='Rounding' V='0'/><Cell N='EndArrowSize' V='2'/><Cell N='BeginArrow' V='0'/><Cell N='EndArrow' V='0'/><Cell N='LineCap' V='0'/><Cell N='BeginArrowSize' V='2'/><Cell N='LineColorTrans' V='0'/><Cell N='CompoundType' V='0'/><Cell N='FillForegnd' V='1'/><Cell N='FillBkgnd' V='0'/><Cell N='FillPattern' V='1'/><Cell N='ShdwForegnd' V='0'/><Cell N='ShdwPattern' V='0'/><Cell N='FillForegndTrans' V='0'/><Cell N='FillBkgndTrans' V='0'/><Cell N='ShdwForegndTrans' V='0'/><Cell N='ShapeShdwType' V='0'/><Cell N='ShapeShdwOffsetX' V='0'/><Cell N='ShapeShdwOffsetY' V='0'/><Cell N='ShapeShdwObliqueAngle' V='0'/><Cell N='ShapeShdwScaleFactor' V='1'/><Cell N='ShapeShdwBlur' V='0'/><Cell N='ShapeShdwShow' V='0'/><Cell N='LeftMargin' V='0'/><Cell N='RightMargin' V='0'/><Cell N='TopMargin' V='0'/><Cell N='BottomMargin' V='0'/><Cell N='VerticalAlign' V='1'/><Cell N='TextBkgnd' V='0'/><Cell N='DefaultTabStop' V='0.5'/><Cell N='TextDirection' V='0'/><Cell N='TextBkgndTrans' V='0'/><Cell N='LockWidth' V='0'/><Cell N='LockHeight' V='0'/><Cell N='LockMoveX' V='0'/><Cell N='LockMoveY' V='0'/><Cell N='LockAspect' V='0'/><Cell N='LockDelete' V='0'/><Cell N='LockBegin' V='0'/><Cell N='LockEnd' V='0'/><Cell N='LockRotate' V='0'/><Cell N='LockCrop' V='0'/><Cell N='LockVtxEdit' V='0'/><Cell N='LockTextEdit' V='0'/><Cell N='LockFormat' V='0'/><Cell N='LockGroup' V='0'/><Cell N='LockCalcWH' V='0'/><Cell N='LockSelect' V='0'/><Cell N='LockCustProp' V='0'/><Cell N='LockFromGroupFormat' V='0'/><Cell N='LockThemeColors' V='0'/><Cell N='LockThemeEffects' V='0'/><Cell N='LockThemeConnectors' V='0'/><Cell N='LockThemeFonts' V='0'/><Cell N='LockThemeIndex' V='0'/><Cell N='LockReplace' V='0'/><Cell N='LockVariation' V='0'/><Cell N='NoObjHandles' V='0'/><Cell N='NonPrinting' V='0'/><Cell N='NoCtlHandles' V='0'/><Cell N='NoAlignBox' V='0'/><Cell N='UpdateAlignBox' V='0'/><Cell N='HideText' V='0'/><Cell N='DynFeedback' V='0'/><Cell N='GlueType' V='0'/><Cell N='WalkPreference' V='0'/><Cell N='BegTrigger' V='0' F='No Formula'/><Cell N='EndTrigger' V='0' F='No Formula'/><Cell N='ObjType' V='0'/><Cell N='Comment' V=''/><Cell N='IsDropSource' V='0'/><Cell N='NoLiveDynamics' V='0'/><Cell N='LocalizeMerge' V='0'/><Cell N='NoProofing' V='0'/><Cell N='Calendar' V='0'/><Cell N='LangID' V='en-US'/><Cell N='ShapeKeywords' V=''/><Cell N='DropOnPageScale' V='1'/><Cell N='TheData' V='0' F='No Formula'/><Cell N='TheText' V='0' F='No Formula'/><Cell N='EventDblClick' V='0' F='No Formula'/><Cell N='EventXFMod' V='0' F='No Formula'/><Cell N='EventDrop' V='0' F='No Formula'/><Cell N='EventMultiDrop' V='0' F='No Formula'/><Cell N='HelpTopic' V=''/><Cell N='Copyright' V=''/><Cell N='LayerMember' V=''/><Cell N='XRulerDensity' V='32'/><Cell N='YRulerDensity' V='32'/><Cell N='XRulerOrigin' V='0'/><Cell N='YRulerOrigin' V='0'/><Cell N='XGridDensity' V='8'/><Cell N='YGridDensity' V='8'/><Cell N='XGridSpacing' V='0'/><Cell N='YGridSpacing' V='0'/><Cell N='XGridOrigin' V='0'/><Cell N='YGridOrigin' V='0'/><Cell N='Gamma' V='1'/><Cell N='Contrast' V='0.5'/><Cell N='Brightness' V='0.5'/><Cell N='Sharpen' V='0'/><Cell N='Blur' V='0'/><Cell N='Denoise' V='0'/><Cell N='Transparency' V='0'/><Cell N='SelectMode' V='1'/><Cell N='DisplayMode' V='2'/><Cell N='IsDropTarget' V='0'/><Cell N='IsSnapTarget' V='1'/><Cell N='IsTextEditTarget' V='1'/><Cell N='DontMoveChildren' V='0'/><Cell N='ShapePermeableX' V='0'/><Cell N='ShapePermeableY' V='0'/><Cell N='ShapePermeablePlace' V='0'/><Cell N='Relationships' V='0'/><Cell N='ShapeFixedCode' V='0'/><Cell N='ShapePlowCode' V='0'/><Cell N='ShapeRouteStyle' V='0'/><Cell N='ShapePlaceStyle' V='0'/><Cell N='ConFixedCode' V='0'/><Cell N='ConLineJumpCode' V='0'/><Cell N='ConLineJumpStyle' V='0'/><Cell N='ConLineJumpDirX' V='0'/><Cell N='ConLineJumpDirY' V='0'/><Cell N='ShapePlaceFlip' V='0'/><Cell N='ConLineRouteExt' V='0'/><Cell N='ShapeSplit' V='0'/><Cell N='ShapeSplittable' V='0'/><Cell N='DisplayLevel' V='0'/><Cell N='ResizePage' V='0'/><Cell N='EnableGrid' V='0'/><Cell N='DynamicsOff' V='0'/><Cell N='CtrlAsInput' V='0'/><Cell N='AvoidPageBreaks' V='0'/><Cell N='PlaceStyle' V='0'/><Cell N='RouteStyle' V='0'/><Cell N='PlaceDepth' V='0'/><Cell N='PlowCode' V='0'/><Cell N='LineJumpCode' V='1'/><Cell N='LineJumpStyle' V='0'/><Cell N='PageLineJumpDirX' V='0'/><Cell N='PageLineJumpDirY' V='0'/><Cell N='LineToNodeX' V='0.125'/><Cell N='LineToNodeY' V='0.125'/><Cell N='BlockSizeX' V='0.25'/><Cell N='BlockSizeY' V='0.25'/><Cell N='AvenueSizeX' V='0.375'/><Cell N='AvenueSizeY' V='0.375'/><Cell N='LineToLineX' V='0.125'/><Cell N='LineToLineY' V='0.125'/><Cell N='LineJumpFactorX' V='0.66666666666667'/><Cell N='LineJumpFactorY' V='0.66666666666667'/><Cell N='LineAdjustFrom' V='0'/><Cell N='LineAdjustTo' V='0'/><Cell N='PlaceFlip' V='0'/><Cell N='LineRouteExt' V='0'/><Cell N='PageShapeSplit' V='0'/><Cell N='PageLeftMargin' V='0.25'/><Cell N='PageRightMargin' V='0.25'/><Cell N='PageTopMargin' V='0.25'/><Cell N='PageBottomMargin' V='0.25'/><Cell N='ScaleX' V='1'/><Cell N='ScaleY' V='1'/><Cell N='PagesX' V='1'/><Cell N='PagesY' V='1'/><Cell N='CenterX' V='0'/><Cell N='CenterY' V='0'/><Cell N='OnPage' V='0'/><Cell N='PrintGrid' V='0'/><Cell N='PrintPageOrientation' V='1'/><Cell N='PaperKind' V='1'/><Cell N='PaperSource' V='7'/><Cell N='QuickStyleLineColor' V='100'/><Cell N='QuickStyleFillColor' V='100'/><Cell N='QuickStyleShadowColor' V='100'/><Cell N='QuickStyleFontColor' V='100'/><Cell N='QuickStyleLineMatrix' V='100'/><Cell N='QuickStyleFillMatrix' V='100'/><Cell N='QuickStyleEffectsMatrix' V='100'/><Cell N='QuickStyleFontMatrix' V='100'/><Cell N='QuickStyleType' V='0'/><Cell N='QuickStyleVariation' V='0'/><Cell N='LineGradientDir' V='0'/><Cell N='LineGradientAngle' V='1.5707963267949'/><Cell N='FillGradientDir' V='0'/><Cell N='FillGradientAngle' V='1.5707963267949'/><Cell N='LineGradientEnabled' V='0'/><Cell N='FillGradientEnabled' V='0'/><Cell N='RotateGradientWithShape' V='1'/><Cell N='UseGroupGradient' V='0'/><Cell N='BevelTopType' V='0'/><Cell N='BevelTopWidth' V='0'/><Cell N='BevelTopHeight' V='0'/><Cell N='BevelBottomType' V='0'/><Cell N='BevelBottomWidth' V='0'/><Cell N='BevelBottomHeight' V='0'/><Cell N='BevelDepthColor' V='1'/><Cell N='BevelDepthSize' V='0'/><Cell N='BevelContourColor' V='0'/><Cell N='BevelContourSize' V='0'/><Cell N='BevelMaterialType' V='0'/><Cell N='BevelLightingType' V='0'/><Cell N='BevelLightingAngle' V='0'/><Cell N='RotationXAngle' V='0'/><Cell N='RotationYAngle' V='0'/><Cell N='RotationZAngle' V='0'/><Cell N='RotationType' V='0'/><Cell N='Perspective' V='0'/><Cell N='DistanceFromGround' V='0'/><Cell N='KeepTextFlat' V='0'/><Cell N='ReflectionTrans' V='0'/><Cell N='ReflectionSize' V='0'/><Cell N='ReflectionDist' V='0'/><Cell N='ReflectionBlur' V='0'/><Cell N='GlowColor' V='1'/><Cell N='GlowColorTrans' V='0'/><Cell N='GlowSize' V='0'/><Cell N='SoftEdgesSize' V='0'/><Cell N='SketchSeed' V='0'/><Cell N='SketchEnabled' V='0'/><Cell N='SketchAmount' V='5'/><Cell N='SketchLineWeight' V='0.04166666666666666' U='PT'/><Cell N='SketchLineChange' V='0.14'/><Cell N='SketchFillChange' V='0.1'/><Cell N='ColorSchemeIndex' V='0'/><Cell N='EffectSchemeIndex' V='0'/><Cell N='ConnectorSchemeIndex' V='0'/><Cell N='FontSchemeIndex' V='0'/><Cell N='ThemeIndex' V='0'/><Cell N='VariationColorIndex' V='0'/><Cell N='VariationStyleIndex' V='0'/><Cell N='EmbellishmentIndex' V='0'/><Cell N='ReplaceLockShapeData' V='0'/><Cell N='ReplaceLockText' V='0'/><Cell N='ReplaceLockFormat' V='0'/><Cell N='ReplaceCopyCells' V='0' U='BOOL' F='No Formula'/><Cell N='PageWidth' V='0' F='No Formula'/><Cell N='PageHeight' V='0' F='No Formula'/><Cell N='ShdwOffsetX' V='0' F='No Formula'/><Cell N='ShdwOffsetY' V='0' F='No Formula'/><Cell N='PageScale' V='0' U='IN_F' F='No Formula'/><Cell N='DrawingScale' V='0' U='IN_F' F='No Formula'/><Cell N='DrawingSizeType' V='0' F='No Formula'/><Cell N='DrawingScaleType' V='0' F='No Formula'/><Cell N='InhibitSnap' V='0' F='No Formula'/><Cell N='PageLockReplace' V='0' U='BOOL' F='No Formula'/><Cell N='PageLockDuplicate' V='0' U='BOOL' F='No Formula'/><Cell N='UIVisibility' V='0' F='No Formula'/><Cell N='ShdwType' V='0' F='No Formula'/><Cell N='ShdwObliqueAngle' V='0' F='No Formula'/><Cell N='ShdwScaleFactor' V='0' F='No Formula'/><Cell N='DrawingResizeType' V='0' F='No Formula'/><Section N='Character'><Row IX='0'><Cell N='Font' V='Calibri'/><Cell N='Color' V='0'/><Cell N='Style' V='0'/><Cell N='Case' V='0'/><Cell N='Pos' V='0'/><Cell N='FontScale' V='1'/><Cell N='Size' V='0.1666666666666667'/><Cell N='DblUnderline' V='0'/><Cell N='Overline' V='0'/><Cell N='Strikethru' V='0'/><Cell N='DoubleStrikethrough' V='0'/><Cell N='Letterspace' V='0'/><Cell N='ColorTrans' V='0'/><Cell N='AsianFont' V='0'/><Cell N='ComplexScriptFont' V='0'/><Cell N='ComplexScriptSize' V='-1'/><Cell N='LangID' V='en-US'/></Row></Section><Section N='Paragraph'><Row IX='0'><Cell N='IndFirst' V='0'/><Cell N='IndLeft' V='0'/><Cell N='IndRight' V='0'/><Cell N='SpLine' V='-1.2'/><Cell N='SpBefore' V='0'/><Cell N='SpAfter' V='0'/><Cell N='HorzAlign' V='1'/><Cell N='Bullet' V='0'/><Cell N='BulletStr' V=''/><Cell N='BulletFont' V='0'/><Cell N='BulletFontSize' V='-1'/><Cell N='TextPosAfterBullet' V='0'/><Cell N='Flags' V='0'/></Row></Section><Section N='Tabs'><Row IX='0'/></Section><Section N='LineGradient'><Row IX='0'><Cell N='GradientStopColor' V='1'/><Cell N='GradientStopColorTrans' V='0'/><Cell N='GradientStopPosition' V='0'/></Row></Section><Section N='FillGradient'><Row IX='0'><Cell N='GradientStopColor' V='1'/><Cell N='GradientStopColorTrans' V='0'/><Cell N='GradientStopPosition' V='0'/></Row></Section></StyleSheet><StyleSheet ID='1' NameU='Text Only' IsCustomNameU='1' Name='Text Only' IsCustomName='1' LineStyle='3' FillStyle='3' TextStyle='3'><Cell N='EnableLineProps' V='1'/><Cell N='EnableFillProps' V='1'/><Cell N='EnableTextProps' V='1'/><Cell N='HideForApply' V='0'/><Cell N='LineWeight' V='Themed' F='Inh'/><Cell N='LineColor' V='Themed' F='Inh'/><Cell N='LinePattern' V='Themed' F='Inh'/><Cell N='Rounding' V='Themed' F='Inh'/><Cell N='EndArrowSize' V='2' F='Inh'/><Cell N='BeginArrow' V='0' F='Inh'/><Cell N='EndArrow' V='0' F='Inh'/><Cell N='LineCap' V='Themed' F='Inh'/><Cell N='BeginArrowSize' V='2' F='Inh'/><Cell N='LineColorTrans' V='Themed' F='Inh'/><Cell N='CompoundType' V='Themed' F='Inh'/><Cell N='FillForegnd' V='Themed' F='Inh'/><Cell N='FillBkgnd' V='Themed' F='Inh'/><Cell N='FillPattern' V='Themed' F='Inh'/><Cell N='ShdwForegnd' V='Themed' F='Inh'/><Cell N='ShdwPattern' V='Themed' F='Inh'/><Cell N='FillForegndTrans' V='Themed' F='Inh'/><Cell N='FillBkgndTrans' V='Themed' F='Inh'/><Cell N='ShdwForegndTrans' V='Themed' F='Inh'/><Cell N='ShapeShdwType' V='Themed' F='Inh'/><Cell N='ShapeShdwOffsetX' V='Themed' F='Inh'/><Cell N='ShapeShdwOffsetY' V='Themed' F='Inh'/><Cell N='ShapeShdwObliqueAngle' V='Themed' F='Inh'/><Cell N='ShapeShdwScaleFactor' V='Themed' F='Inh'/><Cell N='ShapeShdwBlur' V='Themed' F='Inh'/><Cell N='ShapeShdwShow' V='0' F='Inh'/><Cell N='LeftMargin' V='0'/><Cell N='RightMargin' V='0'/><Cell N='TopMargin' V='0'/><Cell N='BottomMargin' V='0'/><Cell N='VerticalAlign' V='0'/><Cell N='TextBkgnd' V='0'/><Cell N='DefaultTabStop' V='0.5' F='Inh'/><Cell N='TextDirection' V='0' F='Inh'/><Cell N='TextBkgndTrans' V='0' F='Inh'/><Cell N='LineGradientDir' V='Themed' F='Inh'/><Cell N='LineGradientAngle' V='Themed' F='Inh'/><Cell N='FillGradientDir' V='Themed' F='Inh'/><Cell N='FillGradientAngle' V='Themed' F='Inh'/><Cell N='LineGradientEnabled' V='Themed' F='Inh'/><Cell N='FillGradientEnabled' V='Themed' F='Inh'/><Cell N='RotateGradientWithShape' V='Themed' F='Inh'/><Cell N='UseGroupGradient' V='Themed' F='Inh'/><Section N='Paragraph'><Row IX='0'><Cell N='IndFirst' V='0' F='Inh'/><Cell N='IndLeft' V='0' F='Inh'/><Cell N='IndRight' V='0' F='Inh'/><Cell N='SpLine' V='-1.2' F='Inh'/><Cell N='SpBefore' V='0' F='Inh'/><Cell N='SpAfter' V='0' F='Inh'/><Cell N='HorzAlign' V='0'/><Cell N='Bullet' V='0' F='Inh'/><Cell N='BulletStr' V='' F='Inh'/><Cell N='BulletFont' V='0' F='Inh'/><Cell N='BulletFontSize' V='-1' F='Inh'/><Cell N='TextPosAfterBullet' V='0' F='Inh'/><Cell N='Flags' V='0' F='Inh'/></Row></Section></StyleSheet><StyleSheet ID='2' NameU='None' IsCustomNameU='1' Name='None' IsCustomName='1' LineStyle='3' FillStyle='3' TextStyle='3'><Cell N='EnableLineProps' V='1'/><Cell N='EnableFillProps' V='1'/><Cell N='EnableTextProps' V='1'/><Cell N='HideForApply' V='0'/><Cell N='LineWeight' V='Themed' F='Inh'/><Cell N='LineColor' V='Themed' F='Inh'/><Cell N='LinePattern' V='0'/><Cell N='Rounding' V='Themed' F='Inh'/><Cell N='EndArrowSize' V='2' F='Inh'/><Cell N='BeginArrow' V='0' F='Inh'/><Cell N='EndArrow' V='0' F='Inh'/><Cell N='LineCap' V='Themed' F='Inh'/><Cell N='BeginArrowSize' V='2' F='Inh'/><Cell N='LineColorTrans' V='Themed' F='Inh'/><Cell N='CompoundType' V='Themed' F='Inh'/><Cell N='FillForegnd' V='Themed' F='Inh'/><Cell N='FillBkgnd' V='Themed' F='Inh'/><Cell N='FillPattern' V='0'/><Cell N='ShdwForegnd' V='Themed' F='Inh'/><Cell N='ShdwPattern' V='Themed' F='Inh'/><Cell N='FillForegndTrans' V='Themed' F='Inh'/><Cell N='FillBkgndTrans' V='Themed' F='Inh'/><Cell N='ShdwForegndTrans' V='Themed' F='Inh'/><Cell N='ShapeShdwType' V='Themed' F='Inh'/><Cell N='ShapeShdwOffsetX' V='Themed' F='Inh'/><Cell N='ShapeShdwOffsetY' V='Themed' F='Inh'/><Cell N='ShapeShdwObliqueAngle' V='Themed' F='Inh'/><Cell N='ShapeShdwScaleFactor' V='Themed' F='Inh'/><Cell N='ShapeShdwBlur' V='Themed' F='Inh'/><Cell N='ShapeShdwShow' V='0' F='Inh'/><Cell N='LineGradientDir' V='Themed' F='Inh'/><Cell N='LineGradientAngle' V='Themed' F='Inh'/><Cell N='FillGradientDir' V='Themed' F='Inh'/><Cell N='FillGradientAngle' V='Themed' F='Inh'/><Cell N='LineGradientEnabled' V='0'/><Cell N='FillGradientEnabled' V='0'/><Cell N='RotateGradientWithShape' V='Themed' F='Inh'/><Cell N='UseGroupGradient' V='Themed' F='Inh'/><Cell N='QuickStyleLineColor' V='100' F='Inh'/><Cell N='QuickStyleFillColor' V='100' F='Inh'/><Cell N='QuickStyleShadowColor' V='100' F='Inh'/><Cell N='QuickStyleFontColor' V='100' F='Inh'/><Cell N='QuickStyleLineMatrix' V='100' F='Inh'/><Cell N='QuickStyleFillMatrix' V='100' F='Inh'/><Cell N='QuickStyleEffectsMatrix' V='0' F='GUARD(0)'/><Cell N='QuickStyleFontMatrix' V='100' F='Inh'/><Cell N='QuickStyleType' V='0' F='Inh'/><Cell N='QuickStyleVariation' V='2'/></StyleSheet><StyleSheet ID='3' NameU='Normal' IsCustomNameU='1' Name='Normal' IsCustomName='1' LineStyle='6' FillStyle='6' TextStyle='6'><Cell N='EnableLineProps' V='1'/><Cell N='EnableFillProps' V='1'/><Cell N='EnableTextProps' V='1'/><Cell N='HideForApply' V='0'/><Cell N='LeftMargin' V='0.05555555555555555' U='PT'/><Cell N='RightMargin' V='0.05555555555555555' U='PT'/><Cell N='TopMargin' V='0.05555555555555555' U='PT'/><Cell N='BottomMargin' V='0.05555555555555555' U='PT'/><Cell N='VerticalAlign' V='1' F='Inh'/><Cell N='TextBkgnd' V='0' F='Inh'/><Cell N='DefaultTabStop' V='0.5' F='Inh'/><Cell N='TextDirection' V='0' F='Inh'/><Cell N='TextBkgndTrans' V='0' F='Inh'/></StyleSheet><StyleSheet ID='4' NameU='Guide' IsCustomNameU='1' Name='Guide' IsCustomName='1' LineStyle='3' FillStyle='3' TextStyle='3'><Cell N='EnableLineProps' V='1'/><Cell N='EnableFillProps' V='1'/><Cell N='EnableTextProps' V='1'/><Cell N='HideForApply' V='0'/><Cell N='LineWeight' V='0' U='PT'/><Cell N='LineColor' V='#7f7f7f'/><Cell N='LinePattern' V='23'/><Cell N='Rounding' V='Themed' F='Inh'/><Cell N='EndArrowSize' V='2' F='Inh'/><Cell N='BeginArrow' V='0' F='Inh'/><Cell N='EndArrow' V='0' F='Inh'/><Cell N='LineCap' V='Themed' F='Inh'/><Cell N='BeginArrowSize' V='2' F='Inh'/><Cell N='LineColorTrans' V='Themed' F='Inh'/><Cell N='CompoundType' V='Themed' F='Inh'/><Cell N='FillForegnd' V='Themed' F='Inh'/><Cell N='FillBkgnd' V='Themed' F='Inh'/><Cell N='FillPattern' V='0'/><Cell N='ShdwForegnd' V='Themed' F='Inh'/><Cell N='ShdwPattern' V='Themed' F='Inh'/><Cell N='FillForegndTrans' V='Themed' F='Inh'/><Cell N='FillBkgndTrans' V='Themed' F='Inh'/><Cell N='ShdwForegndTrans' V='Themed' F='Inh'/><Cell N='ShapeShdwType' V='Themed' F='Inh'/><Cell N='ShapeShdwOffsetX' V='Themed' F='Inh'/><Cell N='ShapeShdwOffsetY' V='Themed' F='Inh'/><Cell N='ShapeShdwObliqueAngle' V='Themed' F='Inh'/><Cell N='ShapeShdwScaleFactor' V='Themed' F='Inh'/><Cell N='ShapeShdwBlur' V='Themed' F='Inh'/><Cell N='ShapeShdwShow' V='0' F='Inh'/><Cell N='LineGradientDir' V='Themed' F='Inh'/><Cell N='LineGradientAngle' V='Themed' F='Inh'/><Cell N='FillGradientDir' V='Themed' F='Inh'/><Cell N='FillGradientAngle' V='Themed' F='Inh'/><Cell N='LineGradientEnabled' V='0'/><Cell N='FillGradientEnabled' V='0'/><Cell N='RotateGradientWithShape' V='Themed' F='Inh'/><Cell N='UseGroupGradient' V='Themed' F='Inh'/><Cell N='LeftMargin' V='0.05555555555555555' U='PT' F='Inh'/><Cell N='RightMargin' V='0.05555555555555555' U='PT' F='Inh'/><Cell N='TopMargin' V='0'/><Cell N='BottomMargin' V='0'/><Cell N='VerticalAlign' V='2'/><Cell N='TextBkgnd' V='0' F='Inh'/><Cell N='DefaultTabStop' V='0.5' F='Inh'/><Cell N='TextDirection' V='0' F='Inh'/><Cell N='TextBkgndTrans' V='0' F='Inh'/><Cell N='NoObjHandles' V='0' F='Inh'/><Cell N='NonPrinting' V='1'/><Cell N='NoCtlHandles' V='0' F='Inh'/><Cell N='NoAlignBox' V='0' F='Inh'/><Cell N='UpdateAlignBox' V='0' F='Inh'/><Cell N='HideText' V='0' F='Inh'/><Cell N='DynFeedback' V='0' F='Inh'/><Cell N='GlueType' V='0' F='Inh'/><Cell N='WalkPreference' V='0' F='Inh'/><Cell N='BegTrigger' V='0' F='No Formula'/><Cell N='EndTrigger' V='0' F='No Formula'/><Cell N='ObjType' V='0' F='Inh'/><Cell N='Comment' V='' F='Inh'/><Cell N='IsDropSource' V='0' F='Inh'/><Cell N='NoLiveDynamics' V='0' F='Inh'/><Cell N='LocalizeMerge' V='0' F='Inh'/><Cell N='NoProofing' V='0' F='Inh'/><Cell N='Calendar' V='0' F='Inh'/><Cell N='LangID' V='en-US' F='Inh'/><Cell N='ShapeKeywords' V='' F='Inh'/><Cell N='DropOnPageScale' V='1' F='Inh'/><Cell N='ShapePermeableX' V='1'/><Cell N='ShapePermeableY' V='1'/><Cell N='ShapePermeablePlace' V='1'/><Cell N='Relationships' V='0' F='Inh'/><Cell N='ShapeFixedCode' V='0' F='Inh'/><Cell N='ShapePlowCode' V='0' F='Inh'/><Cell N='ShapeRouteStyle' V='0' F='Inh'/><Cell N='ShapePlaceStyle' V='0' F='Inh'/><Cell N='ConFixedCode' V='0' F='Inh'/><Cell N='ConLineJumpCode' V='0' F='Inh'/><Cell N='ConLineJumpStyle' V='0' F='Inh'/><Cell N='ConLineJumpDirX' V='0' F='Inh'/><Cell N='ConLineJumpDirY' V='0' F='Inh'/><Cell N='ShapePlaceFlip' V='0' F='Inh'/><Cell N='ConLineRouteExt' V='0' F='Inh'/><Cell N='ShapeSplit' V='0' F='Inh'/><Cell N='ShapeSplittable' V='0' F='Inh'/><Cell N='DisplayLevel' V='0' F='Inh'/><Section N='Character'><Row IX='0'><Cell N='Font' V='Themed' F='Inh'/><Cell N='Color' V='4'/><Cell N='Style' V='Themed' F='Inh'/><Cell N='Case' V='0' F='Inh'/><Cell N='Pos' V='0' F='Inh'/><Cell N='FontScale' V='1' F='Inh'/><Cell N='Size' V='0.125'/><Cell N='DblUnderline' V='0' F='Inh'/><Cell N='Overline' V='0' F='Inh'/><Cell N='Strikethru' V='0' F='Inh'/><Cell N='DoubleStrikethrough' V='0' F='Inh'/><Cell N='Letterspace' V='0' F='Inh'/><Cell N='ColorTrans' V='0' F='Inh'/><Cell N='AsianFont' V='Themed' F='Inh'/><Cell N='ComplexScriptFont' V='Themed' F='Inh'/><Cell N='ComplexScriptSize' V='-1' F='Inh'/><Cell N='LangID' V='en-US' F='Inh'/></Row></Section></StyleSheet><StyleSheet ID='6' NameU='Theme' IsCustomNameU='1' Name='Theme' IsCustomName='1' LineStyle='0' FillStyle='0' TextStyle='0'><Cell N='EnableLineProps' V='1'/><Cell N='EnableFillProps' V='1'/><Cell N='EnableTextProps' V='1'/><Cell N='HideForApply' V='0'/><Cell N='LineWeight' V='Themed' F='THEMEVAL()'/><Cell N='LineColor' V='Themed' F='THEMEVAL()'/><Cell N='LinePattern' V='Themed' F='THEMEVAL()'/><Cell N='Rounding' V='Themed' F='THEMEVAL()'/><Cell N='EndArrowSize' V='2' F='Inh'/><Cell N='BeginArrow' V='0' F='Inh'/><Cell N='EndArrow' V='0' F='Inh'/><Cell N='LineCap' V='Themed' F='THEMEVAL()'/><Cell N='BeginArrowSize' V='2' F='Inh'/><Cell N='LineColorTrans' V='Themed' F='THEMEVAL()'/><Cell N='CompoundType' V='Themed' F='THEMEVAL()'/><Cell N='FillForegnd' V='Themed' F='THEMEVAL()'/><Cell N='FillBkgnd' V='Themed' F='THEMEVAL()'/><Cell N='FillPattern' V='Themed' F='THEMEVAL()'/><Cell N='ShdwForegnd' V='Themed' F='THEMEVAL()'/><Cell N='ShdwPattern' V='Themed' F='THEMEVAL()'/><Cell N='FillForegndTrans' V='Themed' F='THEMEVAL()'/><Cell N='FillBkgndTrans' V='Themed' F='THEMEVAL()'/><Cell N='ShdwForegndTrans' V='Themed' F='THEMEVAL()'/><Cell N='ShapeShdwType' V='Themed' F='THEMEVAL()'/><Cell N='ShapeShdwOffsetX' V='Themed' F='THEMEVAL()'/><Cell N='ShapeShdwOffsetY' V='Themed' F='THEMEVAL()'/><Cell N='ShapeShdwObliqueAngle' V='Themed' F='THEMEVAL()'/><Cell N='ShapeShdwScaleFactor' V='Themed' F='THEMEVAL()'/><Cell N='ShapeShdwBlur' V='Themed' F='THEMEVAL()'/><Cell N='ShapeShdwShow' V='0' F='Inh'/><Cell N='LineGradientDir' V='Themed' F='THEMEVAL()'/><Cell N='LineGradientAngle' V='Themed' F='THEMEVAL()'/><Cell N='FillGradientDir' V='Themed' F='THEMEVAL()'/><Cell N='FillGradientAngle' V='Themed' F='THEMEVAL()'/><Cell N='LineGradientEnabled' V='Themed' F='THEMEVAL()'/><Cell N='FillGradientEnabled' V='Themed' F='THEMEVAL()'/><Cell N='RotateGradientWithShape' V='Themed' F='THEMEVAL()'/><Cell N='UseGroupGradient' V='Themed' F='THEMEVAL()'/><Cell N='BevelTopType' V='Themed' F='THEMEVAL()'/><Cell N='BevelTopWidth' V='Themed' F='THEMEVAL()'/><Cell N='BevelTopHeight' V='Themed' F='THEMEVAL()'/><Cell N='BevelBottomType' V='0' F='Inh'/><Cell N='BevelBottomWidth' V='0' F='Inh'/><Cell N='BevelBottomHeight' V='0' F='Inh'/><Cell N='BevelDepthColor' V='1' F='Inh'/><Cell N='BevelDepthSize' V='0' F='Inh'/><Cell N='BevelContourColor' V='Themed' F='THEMEVAL()'/><Cell N='BevelContourSize' V='Themed' F='THEMEVAL()'/><Cell N='BevelMaterialType' V='Themed' F='THEMEVAL()'/><Cell N='BevelLightingType' V='Themed' F='THEMEVAL()'/><Cell N='BevelLightingAngle' V='Themed' F='THEMEVAL()'/><Cell N='ReflectionTrans' V='Themed' F='THEMEVAL()'/><Cell N='ReflectionSize' V='Themed' F='THEMEVAL()'/><Cell N='ReflectionDist' V='Themed' F='THEMEVAL()'/><Cell N='ReflectionBlur' V='Themed' F='THEMEVAL()'/><Cell N='GlowColor' V='Themed' F='THEMEVAL()'/><Cell N='GlowColorTrans' V='Themed' F='THEMEVAL()'/><Cell N='GlowSize' V='Themed' F='THEMEVAL()'/><Cell N='SoftEdgesSize' V='Themed' F='THEMEVAL()'/><Cell N='SketchSeed' V='0' F='Inh'/><Cell N='SketchEnabled' V='Themed' F='THEMEVAL()'/><Cell N='SketchAmount' V='Themed' F='THEMEVAL()'/><Cell N='SketchLineWeight' V='Themed' F='THEMEVAL()'/><Cell N='SketchLineChange' V='Themed' F='THEMEVAL()'/><Cell N='SketchFillChange' V='Themed' F='THEMEVAL()'/><Cell N='QuickStyleLineColor' V='100'/><Cell N='QuickStyleFillColor' V='100'/><Cell N='QuickStyleShadowColor' V='100'/><Cell N='QuickStyleFontColor' V='100'/><Cell N='QuickStyleLineMatrix' V='100'/><Cell N='QuickStyleFillMatrix' V='100'/><Cell N='QuickStyleEffectsMatrix' V='100'/><Cell N='QuickStyleFontMatrix' V='100'/><Cell N='QuickStyleType' V='0' F='Inh'/><Cell N='QuickStyleVariation' V='0' F='Inh'/><Cell N='ColorSchemeIndex' V='65534'/><Cell N='EffectSchemeIndex' V='65534'/><Cell N='ConnectorSchemeIndex' V='65534'/><Cell N='FontSchemeIndex' V='65534'/><Cell N='ThemeIndex' V='65534'/><Cell N='VariationColorIndex' V='65534'/><Cell N='VariationStyleIndex' V='65534'/><Cell N='EmbellishmentIndex' V='65534'/><Section N='Character'><Row IX='0'><Cell N='Font' V='Themed' F='THEMEVAL()'/><Cell N='Color' V='Themed' F='THEMEVAL()'/><Cell N='Style' V='Themed' F='THEMEVAL()'/><Cell N='Case' V='0' F='Inh'/><Cell N='Pos' V='0' F='Inh'/><Cell N='FontScale' V='1' F='Inh'/><Cell N='Size' V='0.1666666666666667' F='Inh'/><Cell N='DblUnderline' V='0' F='Inh'/><Cell N='Overline' V='0' F='Inh'/><Cell N='Strikethru' V='0' F='Inh'/><Cell N='DoubleStrikethrough' V='0' F='Inh'/><Cell N='Letterspace' V='0' F='Inh'/><Cell N='ColorTrans' V='0' F='Inh'/><Cell N='AsianFont' V='Themed' F='THEMEVAL()'/><Cell N='ComplexScriptFont' V='Themed' F='THEMEVAL()'/><Cell N='ComplexScriptSize' V='-1' F='Inh'/><Cell N='LangID' V='en-US' F='Inh'/></Row></Section><Section N='FillGradient'><Row IX='0'><Cell N='GradientStopColor' V='Themed' F='THEMEVAL()'/><Cell N='GradientStopColorTrans' V='Themed' F='THEMEVAL()'/><Cell N='GradientStopPosition' V='Themed' F='THEMEVAL()'/></Row><Row IX='1'><Cell N='GradientStopColor' V='Themed' F='THEMEVAL()'/><Cell N='GradientStopColorTrans' V='Themed' F='THEMEVAL()'/><Cell N='GradientStopPosition' V='Themed' F='THEMEVAL()'/></Row><Row IX='2'><Cell N='GradientStopColor' V='Themed' F='THEMEVAL()'/><Cell N='GradientStopColorTrans' V='Themed' F='THEMEVAL()'/><Cell N='GradientStopPosition' V='Themed' F='THEMEVAL()'/></Row><Row IX='3'><Cell N='GradientStopColor' V='Themed' F='THEMEVAL()'/><Cell N='GradientStopColorTrans' V='Themed' F='THEMEVAL()'/><Cell N='GradientStopPosition' V='Themed' F='THEMEVAL()'/></Row><Row IX='4'><Cell N='GradientStopColor' V='Themed' F='THEMEVAL()'/><Cell N='GradientStopColorTrans' V='Themed' F='THEMEVAL()'/><Cell N='GradientStopPosition' V='Themed' F='THEMEVAL()'/></Row><Row IX='5'><Cell N='GradientStopColor' V='Themed' F='THEMEVAL()'/><Cell N='GradientStopColorTrans' V='Themed' F='THEMEVAL()'/><Cell N='GradientStopPosition' V='Themed' F='THEMEVAL()'/></Row><Row IX='6'><Cell N='GradientStopColor' V='Themed' F='THEMEVAL()'/><Cell N='GradientStopColorTrans' V='Themed' F='THEMEVAL()'/><Cell N='GradientStopPosition' V='Themed' F='THEMEVAL()'/></Row><Row IX='7'><Cell N='GradientStopColor' V='Themed' F='THEMEVAL()'/><Cell N='GradientStopColorTrans' V='Themed' F='THEMEVAL()'/><Cell N='GradientStopPosition' V='Themed' F='THEMEVAL()'/></Row><Row IX='8'><Cell N='GradientStopColor' V='Themed' F='THEMEVAL()'/><Cell N='GradientStopColorTrans' V='Themed' F='THEMEVAL()'/><Cell N='GradientStopPosition' V='Themed' F='THEMEVAL()'/></Row><Row IX='9'><Cell N='GradientStopColor' V='Themed' F='THEMEVAL()'/><Cell N='GradientStopColorTrans' V='Themed' F='THEMEVAL()'/><Cell N='GradientStopPosition' V='Themed' F='THEMEVAL()'/></Row></Section><Section N='LineGradient'><Row IX='0'><Cell N='GradientStopColor' V='Themed' F='THEMEVAL()'/><Cell N='GradientStopColorTrans' V='Themed' F='THEMEVAL()'/><Cell N='GradientStopPosition' V='Themed' F='THEMEVAL()'/></Row><Row IX='1'><Cell N='GradientStopColor' V='Themed' F='THEMEVAL()'/><Cell N='GradientStopColorTrans' V='Themed' F='THEMEVAL()'/><Cell N='GradientStopPosition' V='Themed' F='THEMEVAL()'/></Row><Row IX='2'><Cell N='GradientStopColor' V='Themed' F='THEMEVAL()'/><Cell N='GradientStopColorTrans' V='Themed' F='THEMEVAL()'/><Cell N='GradientStopPosition' V='Themed' F='THEMEVAL()'/></Row><Row IX='3'><Cell N='GradientStopColor' V='Themed' F='THEMEVAL()'/><Cell N='GradientStopColorTrans' V='Themed' F='THEMEVAL()'/><Cell N='GradientStopPosition' V='Themed' F='THEMEVAL()'/></Row><Row IX='4'><Cell N='GradientStopColor' V='Themed' F='THEMEVAL()'/><Cell N='GradientStopColorTrans' V='Themed' F='THEMEVAL()'/><Cell N='GradientStopPosition' V='Themed' F='THEMEVAL()'/></Row><Row IX='5'><Cell N='GradientStopColor' V='Themed' F='THEMEVAL()'/><Cell N='GradientStopColorTrans' V='Themed' F='THEMEVAL()'/><Cell N='GradientStopPosition' V='Themed' F='THEMEVAL()'/></Row><Row IX='6'><Cell N='GradientStopColor' V='Themed' F='THEMEVAL()'/><Cell N='GradientStopColorTrans' V='Themed' F='THEMEVAL()'/><Cell N='GradientStopPosition' V='Themed' F='THEMEVAL()'/></Row><Row IX='7'><Cell N='GradientStopColor' V='Themed' F='THEMEVAL()'/><Cell N='GradientStopColorTrans' V='Themed' F='THEMEVAL()'/><Cell N='GradientStopPosition' V='Themed' F='THEMEVAL()'/></Row><Row IX='8'><Cell N='GradientStopColor' V='Themed' F='THEMEVAL()'/><Cell N='GradientStopColorTrans' V='Themed' F='THEMEVAL()'/><Cell N='GradientStopPosition' V='Themed' F='THEMEVAL()'/></Row><Row IX='9'><Cell N='GradientStopColor' V='Themed' F='THEMEVAL()'/><Cell N='GradientStopColorTrans' V='Themed' F='THEMEVAL()'/><Cell N='GradientStopPosition' V='Themed' F='THEMEVAL()'/></Row></Section></StyleSheet><StyleSheet ID='7' NameU='Flow Normal' IsCustomNameU='1' Name='Flow Normal' IsCustomName='1' LineStyle='6' FillStyle='6' TextStyle='6'><Cell N='EnableLineProps' V='1'/><Cell N='EnableFillProps' V='1'/><Cell N='EnableTextProps' V='1'/><Cell N='HideForApply' V='0'/><Cell N='LineWeight' V='0.003333333333333333' U='PT' F='THEMEVAL("LineWeight",0.24PT)'/><Cell N='LineColor' V='#000000' F='THEMEVAL("LineColor",RGB(0,0,0))'/><Cell N='LinePattern' V='Themed' F='Inh'/><Cell N='Rounding' V='Themed' F='Inh'/><Cell N='EndArrowSize' V='2' F='Inh'/><Cell N='BeginArrow' V='0' F='Inh'/><Cell N='EndArrow' V='0' F='Inh'/><Cell N='LineCap' V='Themed' F='Inh'/><Cell N='BeginArrowSize' V='2' F='Inh'/><Cell N='LineColorTrans' V='Themed' F='Inh'/><Cell N='CompoundType' V='Themed' F='Inh'/><Cell N='NoObjHandles' V='0' F='Inh'/><Cell N='NonPrinting' V='0' F='Inh'/><Cell N='NoCtlHandles' V='0' F='Inh'/><Cell N='NoAlignBox' V='0' F='Inh'/><Cell N='UpdateAlignBox' V='0' F='Inh'/><Cell N='HideText' V='0' F='Inh'/><Cell N='DynFeedback' V='0' F='Inh'/><Cell N='GlueType' V='0' F='Inh'/><Cell N='WalkPreference' V='0' F='Inh'/><Cell N='BegTrigger' V='0' F='No Formula'/><Cell N='EndTrigger' V='0' F='No Formula'/><Cell N='ObjType' V='0' F='Inh'/><Cell N='Comment' V='' F='Inh'/><Cell N='IsDropSource' V='0' F='Inh'/><Cell N='NoLiveDynamics' V='0' F='Inh'/><Cell N='LocalizeMerge' V='0' F='Inh'/><Cell N='NoProofing' V='0' F='Inh'/><Cell N='Calendar' V='0' F='Inh'/><Cell N='LangID' V='en-US' F='Inh'/><Cell N='ShapeKeywords' V='' F='Inh'/><Cell N='DropOnPageScale' V='1' F='Inh'/><Cell N='FillForegnd' V='Themed' F='Inh'/><Cell N='FillBkgnd' V='15' F='THEMEVAL("FillColor2",15)'/><Cell N='FillPattern' V='Themed' F='Inh'/><Cell N='ShdwForegnd' V='Themed' F='Inh'/><Cell N='ShdwPattern' V='Themed' F='Inh'/><Cell N='FillForegndTrans' V='Themed' F='Inh'/><Cell N='FillBkgndTrans' V='Themed' F='Inh'/><Cell N='ShdwForegndTrans' V='Themed' F='Inh'/><Cell N='ShapeShdwType' V='Themed' F='Inh'/><Cell N='ShapeShdwOffsetX' V='Themed' F='Inh'/><Cell N='ShapeShdwOffsetY' V='Themed' F='Inh'/><Cell N='ShapeShdwObliqueAngle' V='Themed' F='Inh'/><Cell N='ShapeShdwScaleFactor' V='Themed' F='Inh'/><Cell N='ShapeShdwBlur' V='Themed' F='Inh'/><Cell N='ShapeShdwShow' V='0' F='Inh'/><Cell N='LeftMargin' V='0.02777777777777778' U='PT'/><Cell N='RightMargin' V='0.02777777777777778' U='PT'/><Cell N='TopMargin' V='0.02777777777777778' U='PT'/><Cell N='BottomMargin' V='0.02777777777777778' U='PT'/><Cell N='VerticalAlign' V='1' F='Inh'/><Cell N='TextBkgnd' V='0' F='Inh'/><Cell N='DefaultTabStop' V='0.5' F='Inh'/><Cell N='TextDirection' V='0' F='Inh'/><Cell N='TextBkgndTrans' V='0' F='Inh'/><Cell N='LockWidth' V='0' F='Inh'/><Cell N='LockHeight' V='0' F='Inh'/><Cell N='LockMoveX' V='0' F='Inh'/><Cell N='LockMoveY' V='0' F='Inh'/><Cell N='LockAspect' V='0' F='Inh'/><Cell N='LockDelete' V='0' F='Inh'/><Cell N='LockBegin' V='0' F='Inh'/><Cell N='LockEnd' V='0' F='Inh'/><Cell N='LockRotate' V='0' F='Inh'/><Cell N='LockCrop' V='0' F='Inh'/><Cell N='LockVtxEdit' V='0' F='Inh'/><Cell N='LockTextEdit' V='0' F='Inh'/><Cell N='LockFormat' V='0' F='Inh'/><Cell N='LockGroup' V='0' F='Inh'/><Cell N='LockCalcWH' V='0' F='Inh'/><Cell N='LockSelect' V='0' F='Inh'/><Cell N='LockCustProp' V='0' F='Inh'/><Cell N='LockFromGroupFormat' V='0' F='Inh'/><Cell N='LockThemeColors' V='0' F='Inh'/><Cell N='LockThemeEffects' V='0' F='Inh'/><Cell N='LockThemeConnectors' V='0' F='Inh'/><Cell N='LockThemeFonts' V='0' F='Inh'/><Cell N='LockThemeIndex' V='0' F='Inh'/><Cell N='LockReplace' V='0' F='Inh'/><Cell N='LockVariation' V='0' F='Inh'/><Cell N='SelectMode' V='1' F='Inh'/><Cell N='DisplayMode' V='2' F='Inh'/><Cell N='IsDropTarget' V='0' F='Inh'/><Cell N='IsSnapTarget' V='1' F='Inh'/><Cell N='IsTextEditTarget' V='1' F='Inh'/><Cell N='DontMoveChildren' V='0' F='Inh'/><Cell N='Gamma' V='1' F='Inh'/><Cell N='Contrast' V='0.5' F='Inh'/><Cell N='Brightness' V='0.5' F='Inh'/><Cell N='Sharpen' V='0' F='Inh'/><Cell N='Blur' V='0' F='Inh'/><Cell N='Denoise' V='0' F='Inh'/><Cell N='Transparency' V='0' F='Inh'/><Cell N='TheData' V='0' F='No Formula'/><Cell N='TheText' V='0' F='No Formula'/><Cell N='EventDblClick' V='0' F='DEFAULTEVENT()'/><Cell N='EventXFMod' V='0' F='No Formula'/><Cell N='EventDrop' V='0' F='No Formula'/><Cell N='EventMultiDrop' V='0' F='No Formula'/><Cell N='ShapePermeableX' V='0' F='Inh'/><Cell N='ShapePermeableY' V='0' F='Inh'/><Cell N='ShapePermeablePlace' V='0' F='Inh'/><Cell N='Relationships' V='0' F='Inh'/><Cell N='ShapeFixedCode' V='0' F='Inh'/><Cell N='ShapePlowCode' V='0' F='Inh'/><Cell N='ShapeRouteStyle' V='0' F='Inh'/><Cell N='ShapePlaceStyle' V='0' F='Inh'/><Cell N='ConFixedCode' V='0' F='Inh'/><Cell N='ConLineJumpCode' V='0' F='Inh'/><Cell N='ConLineJumpStyle' V='0' F='Inh'/><Cell N='ConLineJumpDirX' V='0' F='Inh'/><Cell N='ConLineJumpDirY' V='0' F='Inh'/><Cell N='ShapePlaceFlip' V='0' F='Inh'/><Cell N='ConLineRouteExt' V='0' F='Inh'/><Cell N='ShapeSplit' V='0' F='Inh'/><Cell N='ShapeSplittable' V='0' F='Inh'/><Cell N='DisplayLevel' V='0' F='Inh'/><Section N='Character'><Row IX='0'><Cell N='Font' V='Themed' F='Inh'/><Cell N='Color' V='#000000' F='THEMEVAL("TextColor",RGB(0,0,0))'/><Cell N='Style' V='Themed' F='Inh'/><Cell N='Case' V='0' F='Inh'/><Cell N='Pos' V='0' F='Inh'/><Cell N='FontScale' V='1' F='Inh'/><Cell N='Size' V='0.1111111111111111' U='PT'/><Cell N='DblUnderline' V='0' F='Inh'/><Cell N='Overline' V='0' F='Inh'/><Cell N='Strikethru' V='0' F='Inh'/><Cell N='DoubleStrikethrough' V='0' F='Inh'/><Cell N='Letterspace' V='0' F='Inh'/><Cell N='ColorTrans' V='0' F='Inh'/><Cell N='AsianFont' V='Themed' F='Inh'/><Cell N='ComplexScriptFont' V='Themed' F='Inh'/><Cell N='ComplexScriptSize' V='-1' F='Inh'/><Cell N='LangID' V='en-US' F='Inh'/></Row></Section><Section N='Paragraph'><Row IX='0'><Cell N='IndFirst' V='0' F='Inh'/><Cell N='IndLeft' V='0' F='Inh'/><Cell N='IndRight' V='0' F='Inh'/><Cell N='SpLine' V='-1.2' F='Inh'/><Cell N='SpBefore' V='0' F='Inh'/><Cell N='SpAfter' V='0' F='Inh'/><Cell N='HorzAlign' V='1' F='Inh'/><Cell N='Bullet' V='0' F='Inh'/><Cell N='BulletStr' V='' F='Inh'/><Cell N='BulletFont' V='0' F='Inh'/><Cell N='BulletFontSize' V='-1' F='Inh'/><Cell N='TextPosAfterBullet' V='0' F='Inh'/><Cell N='Flags' V='0'/></Row></Section></StyleSheet><StyleSheet ID='8' NameU='Connector' IsCustomNameU='1' Name='Connector' IsCustomName='1' LineStyle='3' FillStyle='3' TextStyle='3'><Cell N='EnableLineProps' V='1'/><Cell N='EnableFillProps' V='1'/><Cell N='EnableTextProps' V='1'/><Cell N='HideForApply' V='0'/><Cell N='LineWeight' V='0.01041666666666667' F='THEMEVAL("ConnectorWeight")'/><Cell N='LineColor' V='0' F='THEMEVAL("ConnectorColor",0)'/><Cell N='LinePattern' V='1' F='THEMEVAL("ConnectorPattern")'/><Cell N='Rounding' V='0' F='THEMEVAL("ConnectorRounding")'/><Cell N='EndArrowSize' V='2' F='THEMEVAL("ConnectorEndSize")'/><Cell N='BeginArrow' V='0' F='THEMEVAL("ConnectorBegin")'/><Cell N='EndArrow' V='0' F='THEMEVAL("ConnectorEnd")'/><Cell N='LineCap' V='Themed' F='Inh'/><Cell N='BeginArrowSize' V='2' F='THEMEVAL("ConnectorBeginSize")'/><Cell N='LineColorTrans' V='0' F='THEMEVAL("ConnectorTransparency")'/><Cell N='CompoundType' V='Themed' F='Inh'/><Cell N='NoObjHandles' V='0' F='Inh'/><Cell N='NonPrinting' V='0' F='Inh'/><Cell N='NoCtlHandles' V='0' F='Inh'/><Cell N='NoAlignBox' V='0' F='Inh'/><Cell N='UpdateAlignBox' V='0' F='Inh'/><Cell N='HideText' V='0' F='Inh'/><Cell N='DynFeedback' V='0' F='Inh'/><Cell N='GlueType' V='0' F='Inh'/><Cell N='WalkPreference' V='0' F='Inh'/><Cell N='BegTrigger' V='0' F='No Formula'/><Cell N='EndTrigger' V='0' F='No Formula'/><Cell N='ObjType' V='0' F='Inh'/><Cell N='Comment' V='' F='Inh'/><Cell N='IsDropSource' V='0' F='Inh'/><Cell N='NoLiveDynamics' V='0' F='Inh'/><Cell N='LocalizeMerge' V='0' F='Inh'/><Cell N='NoProofing' V='0' F='Inh'/><Cell N='Calendar' V='0' F='Inh'/><Cell N='LangID' V='en-US' F='Inh'/><Cell N='ShapeKeywords' V='' F='Inh'/><Cell N='DropOnPageScale' V='1' F='Inh'/><Cell N='LeftMargin' V='0.05555555555555555' U='PT' F='Inh'/><Cell N='RightMargin' V='0.05555555555555555' U='PT' F='Inh'/><Cell N='TopMargin' V='0.05555555555555555' U='PT' F='Inh'/><Cell N='BottomMargin' V='0.05555555555555555' U='PT' F='Inh'/><Cell N='VerticalAlign' V='1' F='Inh'/><Cell N='TextBkgnd' V='#ffffff' F='THEMEGUARD(THEMEVAL("BackgroundColor")+1)'/><Cell N='DefaultTabStop' V='0.5' F='Inh'/><Cell N='TextDirection' V='0' F='Inh'/><Cell N='TextBkgndTrans' V='0' F='Inh'/><Cell N='FillForegnd' V='Themed' F='Inh'/><Cell N='FillBkgnd' V='Themed' F='Inh'/><Cell N='FillPattern' V='Themed' F='Inh'/><Cell N='ShdwForegnd' V='Themed' F='Inh'/><Cell N='ShdwPattern' V='0' F='THEMEGUARD(0)'/><Cell N='FillForegndTrans' V='Themed' F='Inh'/><Cell N='FillBkgndTrans' V='Themed' F='Inh'/><Cell N='ShdwForegndTrans' V='Themed' F='Inh'/><Cell N='ShapeShdwType' V='Themed' F='Inh'/><Cell N='ShapeShdwOffsetX' V='Themed' F='Inh'/><Cell N='ShapeShdwOffsetY' V='Themed' F='Inh'/><Cell N='ShapeShdwObliqueAngle' V='Themed' F='Inh'/><Cell N='ShapeShdwScaleFactor' V='Themed' F='Inh'/><Cell N='ShapeShdwBlur' V='Themed' F='Inh'/><Cell N='ShapeShdwShow' V='0' F='Inh'/><Cell N='QuickStyleLineColor' V='100'/><Cell N='QuickStyleFillColor' V='100'/><Cell N='QuickStyleShadowColor' V='100'/><Cell N='QuickStyleFontColor' V='100'/><Cell N='QuickStyleLineMatrix' V='1'/><Cell N='QuickStyleFillMatrix' V='1'/><Cell N='QuickStyleEffectsMatrix' V='1'/><Cell N='QuickStyleFontMatrix' V='1'/><Cell N='QuickStyleType' V='0' F='Inh'/><Cell N='QuickStyleVariation' V='0' F='Inh'/><Section N='Character'><Row IX='0'><Cell N='Font' V='Themed' F='Inh'/><Cell N='Color' V='Themed' F='Inh'/><Cell N='Style' V='Themed' F='Inh'/><Cell N='Case' V='0' F='Inh'/><Cell N='Pos' V='0' F='Inh'/><Cell N='FontScale' V='1' F='Inh'/><Cell N='Size' V='0.1111111111111111'/><Cell N='DblUnderline' V='0' F='Inh'/><Cell N='Overline' V='0' F='Inh'/><Cell N='Strikethru' V='0' F='Inh'/><Cell N='DoubleStrikethrough' V='0' F='Inh'/><Cell N='Letterspace' V='0' F='Inh'/><Cell N='ColorTrans' V='0' F='Inh'/><Cell N='AsianFont' V='Themed' F='Inh'/><Cell N='ComplexScriptFont' V='Themed' F='Inh'/><Cell N='ComplexScriptSize' V='-1' F='Inh'/><Cell N='LangID' V='en-US' F='Inh'/></Row></Section></StyleSheet></StyleSheets><DocumentSheet NameU='TheDoc' IsCustomNameU='1' Name='TheDoc' IsCustomName='1' LineStyle='0' FillStyle='0' TextStyle='0'><Cell N='OutputFormat' V='0'/><Cell N='LockPreview' V='0'/><Cell N='AddMarkup' V='0'/><Cell N='ViewMarkup' V='0'/><Cell N='DocLockReplace' V='0' U='BOOL'/><Cell N='NoCoauth' V='0' U='BOOL'/><Cell N='DocLockDuplicatePage' V='0' U='BOOL'/><Cell N='PreviewQuality' V='0' F='No Formula'/><Cell N='PreviewScope' V='0' F='No Formula'/><Cell N='DocLangID' V='en-US'/><Section N='User'><Row N='msvNoAutoConnect'><Cell N='Value' V='0'/><Cell N='Prompt' V='' F='No Formula'/></Row></Section></DocumentSheet><EventList><EventItem ID='0' EventCode='2' Action='1' Enabled='1' Target='QueueMarkerEvent' TargetArgs='soln=BASFLO /cmd=DocCreated'/><EventItem ID='1' EventCode='1' Action='1' Enabled='1' Target='QueueMarkerEvent' TargetArgs='soln=BASFLO /cmd=DocOpened'/></EventList></VisioDocument>
