# Supplementary material for: Adjusting eye aspect ratio for strong eye blink detection based on facial landmarks
Source: PeerJ Comput Sci. 2022 Apr 18;8:e943. doi: 10.7717/peerj-cs.943 (PMC9044337; doi:10.7717/peerj-cs.943)
Supplement: Supplemental Information 8 [file peerj-cs-08-943-s008.vsdx › visio/masters/_rels/masters.xml.rels]

<?xml version="1.0" encoding="UTF-8" standalone="yes"?>
<Relationships xmlns="http://schemas.openxmlformats.org/package/2006/relationships"><Relationship Id="rId3" Type="http://schemas.microsoft.com/visio/2010/relationships/master" Target="master3.xml"/><Relationship Id="rId7" Type="http://schemas.microsoft.com/visio/2010/relationships/master" Target="master7.xml"/><Relationship Id="rId2" Type="http://schemas.microsoft.com/visio/2010/relationships/master" Target="master2.xml"/><Relationship Id="rId1" Type="http://schemas.microsoft.com/visio/2010/relationships/master" Target="master1.xml"/><Relationship Id="rId6" Type="http://schemas.microsoft.com/visio/2010/relationships/master" Target="master6.xml"/><Relationship Id="rId5" Type="http://schemas.microsoft.com/visio/2010/relationships/master" Target="master5.xml"/><Relationship Id="rId4" Type="http://schemas.microsoft.com/visio/2010/relationships/master" Target="master4.xml"/></Relationships>
