# Supplementary material for: Adjusting eye aspect ratio for strong eye blink detection based on facial landmarks
Source: PeerJ Comput Sci. 2022 Apr 18;8:e943. doi: 10.7717/peerj-cs.943 (PMC9044337; doi:10.7717/peerj-cs.943)
Supplement: Supplemental Information 8 [file peerj-cs-08-943-s008.vsdx › visio/masters/master1.xml]

<?xml version='1.0' encoding='utf-8' ?>
<MasterContents xmlns='http://schemas.microsoft.com/office/visio/2012/main' xmlns:r='http://schemas.openxmlformats.org/officeDocument/2006/relationships' xml:space='preserve'><Shapes><Shape ID='5' OriginalID='0' Type='Shape' LineStyle='8' FillStyle='8' TextStyle='8'><Cell N='PinX' V='1.5' F='GUARD((BeginX+EndX)/2)'/><Cell N='PinY' V='1.5' F='GUARD((BeginY+EndY)/2)'/><Cell N='Width' V='1' F='GUARD(EndX-BeginX)'/><Cell N='Height' V='-1' F='GUARD(EndY-BeginY)'/><Cell N='LocPinX' V='0.5' F='GUARD(Width*0.5)'/><Cell N='LocPinY' V='-0.5' F='GUARD(Height*0.5)'/><Cell N='Angle' V='0' F='GUARD(0DA)'/><Cell N='FlipX' V='0' F='GUARD(FALSE)'/><Cell N='FlipY' V='0' F='GUARD(FALSE)'/><Cell N='ResizeMode' V='0'/><Cell N='BeginX' V='1'/><Cell N='BeginY' V='2'/><Cell N='EndX' V='2'/><Cell N='EndY' V='1'/><Cell N='TxtPinX' V='0' F='SETATREF(Controls.TextPosition)'/><Cell N='TxtPinY' V='-1' F='SETATREF(Controls.TextPosition.Y)'/><Cell N='TxtWidth' V='0.5555555555555556' F='MAX(TEXTWIDTH(TheText),5*Char.Size)'/><Cell N='TxtHeight' V='0.2444444444444444' F='TEXTHEIGHT(TheText,TxtWidth)'/><Cell N='TxtLocPinX' V='0.2777777777777778' F='TxtWidth*0.5'/><Cell N='TxtLocPinY' V='0.1222222222222222' F='TxtHeight*0.5'/><Cell N='TxtAngle' V='0'/><Cell N='LockHeight' V='1'/><Cell N='LockCalcWH' V='1'/><Cell N='HelpTopic' V='Vis_SE.chm!#20000'/><Cell N='Copyright' V='Copyright 2001 Microsoft Corporation.  All rights reserved.'/><Cell N='NoAlignBox' V='1'/><Cell N='DynFeedback' V='2'/><Cell N='GlueType' V='2'/><Cell N='ObjType' V='2'/><Cell N='NoLiveDynamics' V='1'/><Cell N='ShapeSplittable' V='1'/><Cell N='LayerMember' V='0'/><Section N='Control'><Row N='TextPosition'><Cell N='X' V='0'/><Cell N='Y' V='-1'/><Cell N='XDyn' V='0' F='Controls.TextPosition'/><Cell N='YDyn' V='-1' F='Controls.TextPosition.Y'/><Cell N='XCon' V='5' F='IF(OR(STRSAME(SHAPETEXT(TheText),""),HideText),5,0)'/><Cell N='YCon' V='0'/><Cell N='CanGlue' V='0'/><Cell N='Prompt' V='Reposition Text'/></Row></Section><Section N='Geometry' IX='0'><Cell N='NoFill' V='1'/><Cell N='NoLine' V='0'/><Cell N='NoShow' V='0'/><Cell N='NoSnap' V='0'/><Cell N='NoQuickDrag' V='0'/><Row T='MoveTo' IX='1'><Cell N='X' V='0'/><Cell N='Y' V='0'/></Row><Row T='LineTo' IX='2'><Cell N='X' V='0'/><Cell N='Y' V='-1'/></Row><Row T='LineTo' IX='3'><Cell N='X' V='1'/><Cell N='Y' V='-1'/></Row></Section></Shape></Shapes></MasterContents>
