# Supplementary material for: Adjusting eye aspect ratio for strong eye blink detection based on facial landmarks
Source: PeerJ Comput Sci. 2022 Apr 18;8:e943. doi: 10.7717/peerj-cs.943 (PMC9044337; doi:10.7717/peerj-cs.943)
Supplement: Supplemental Information 8 [file peerj-cs-08-943-s008.vsdx › visio/masters/master2.xml]

<?xml version='1.0' encoding='utf-8' ?>
<MasterContents xmlns='http://schemas.microsoft.com/office/visio/2012/main' xmlns:r='http://schemas.openxmlformats.org/officeDocument/2006/relationships' xml:space='preserve'><Shapes><Shape ID='5' Type='Shape' LineStyle='3' FillStyle='3' TextStyle='3'><Cell N='PinX' V='1.968503917589432' U='MM'/><Cell N='PinY' V='1.968503920581397' U='MM'/><Cell N='Width' V='1.574803149606299' U='MM'/><Cell N='Height' V='1.181102362204724' U='MM'/><Cell N='LocPinX' V='0.7874015748031495' U='MM' F='Width*0.5'/><Cell N='LocPinY' V='0.5905511811023622' U='MM' F='Height*0.5'/><Cell N='Angle' V='0'/><Cell N='FlipX' V='0'/><Cell N='FlipY' V='0'/><Cell N='ResizeMode' V='0'/><Cell N='LineWeight' V='0.003333333333333333' U='PT' F='THEMEVAL("LineWeight",0.24PT)'/><Cell N='QuickStyleType' V='2'/><Cell N='EventDblClick' V='0' F='OPENTEXTWIN()'/><Cell N='ShapeSplit' V='1'/><Cell N='HelpTopic' V='Vis_Sba.chm!#45755'/><Cell N='Copyright' V='Copyright (c) 2012 Microsoft Corporation.  All rights reserved.'/><Section N='User'><Row N='CTypeTopLeftSnip'><Cell N='Value' V='0' U='BOOL'/><Cell N='Prompt' V=''/></Row><Row N='CTypeTopRightSnip'><Cell N='Value' V='0' U='BOOL'/><Cell N='Prompt' V=''/></Row><Row N='CTypeBotLeftSnip'><Cell N='Value' V='0' U='BOOL'/><Cell N='Prompt' V=''/></Row><Row N='CTypeBotRightSnip'><Cell N='Value' V='0' U='BOOL'/><Cell N='Prompt' V=''/></Row><Row N='CornerLockHoriz'><Cell N='Value' V='1' U='BOOL'/><Cell N='Prompt' V=''/></Row><Row N='CornerLockVert'><Cell N='Value' V='1' U='BOOL'/><Cell N='Prompt' V=''/></Row><Row N='CornerLockDiag'><Cell N='Value' V='0' U='BOOL'/><Cell N='Prompt' V=''/></Row><Row N='TopLeftOffset'><Cell N='Value' V='0.1574803149606299' U='MM' F='IF(User.CornerLockHoriz,Width-Controls.TopRight,IF(User.CornerLockDiag,Width-Controls.BotRight,Controls.TopLeft))'/><Cell N='Prompt' V=''/></Row><Row N='TopRightOffset'><Cell N='Value' V='0.1574803149606299' U='MM' F='IF(User.CornerLockDiag,Controls.BotLeft,Width-Controls.TopRight)'/><Cell N='Prompt' V=''/></Row><Row N='BotLeftOffset'><Cell N='Value' V='0.1574803149606299' U='MM' F='IF(AND(User.CornerLockHoriz,User.CornerLockVert),Width-Controls.TopRight,IF(User.CornerLockHoriz,Width-Controls.BotRight,IF(User.CornerLockVert,Controls.TopLeft,Controls.BotLeft)))'/><Cell N='Prompt' V=''/></Row><Row N='BotRightOffset'><Cell N='Value' V='0.1574803149606299' U='MM' F='IF(User.CornerLockVert,Width-Controls.TopRight,Width-Controls.BotRight)'/><Cell N='Prompt' V=''/></Row><Row N='visVersion'><Cell N='Value' V='15'/><Cell N='Prompt' V=''/></Row></Section><Section N='Actions'><Row N='CornerType'><Cell N='Menu' V='Corner Type'/><Cell N='Action' V='0' F='""'/><Cell N='Checked' V='0'/><Cell N='Disabled' V='0'/><Cell N='ReadOnly' V='0'/><Cell N='Invisible' V='1'/><Cell N='BeginGroup' V='1'/><Cell N='FlyoutChild' V='0'/><Cell N='TagName' V=''/><Cell N='ButtonFace' V=''/><Cell N='SortKey' V=''/></Row><Row N='TopLeftType'><Cell N='Menu' V='&amp;Top Left To Snip' F='"&amp;Top Left To "&amp;IF(User.CTypeTopLeftSnip,"Rounded","Snip")'/><Cell N='Action' V='0' F='SETF(GetRef(User.CTypeTopLeftSnip),NOT(User.CTypeTopLeftSnip))'/><Cell N='Checked' V='0'/><Cell N='Disabled' V='0'/><Cell N='ReadOnly' V='0'/><Cell N='Invisible' V='1'/><Cell N='BeginGroup' V='0'/><Cell N='FlyoutChild' V='1'/><Cell N='TagName' V=''/><Cell N='ButtonFace' V=''/><Cell N='SortKey' V=''/></Row><Row N='TopRightType'><Cell N='Menu' V='To&amp;p Right To Snip' F='"To&amp;p Right To "&amp;IF(User.CTypeTopRightSnip,"Rounded","Snip")'/><Cell N='Action' V='0' F='SETF(GetRef(User.CTypeTopRightSnip),NOT(User.CTypeTopRightSnip))'/><Cell N='Checked' V='0'/><Cell N='Disabled' V='0'/><Cell N='ReadOnly' V='0'/><Cell N='Invisible' V='1'/><Cell N='BeginGroup' V='0'/><Cell N='FlyoutChild' V='1'/><Cell N='TagName' V=''/><Cell N='ButtonFace' V=''/><Cell N='SortKey' V=''/></Row><Row N='BotLeftType'><Cell N='Menu' V='&amp;Bottom Left To Snip' F='"&amp;Bottom Left To "&amp;IF(User.CTypeBotLeftSnip,"Rounded","Snip")'/><Cell N='Action' V='0' F='SETF(GetRef(User.CTypeBotLeftSnip),NOT(User.CTypeBotLeftSnip))'/><Cell N='Checked' V='0'/><Cell N='Disabled' V='0'/><Cell N='ReadOnly' V='0'/><Cell N='Invisible' V='1'/><Cell N='BeginGroup' V='0'/><Cell N='FlyoutChild' V='1'/><Cell N='TagName' V=''/><Cell N='ButtonFace' V=''/><Cell N='SortKey' V=''/></Row><Row N='BotRightType'><Cell N='Menu' V='B&amp;ottom Right To Snip' F='"B&amp;ottom Right To "&amp;IF(User.CTypeBotRightSnip,"Rounded","Snip")'/><Cell N='Action' V='0' F='SETF(GetRef(User.CTypeBotRightSnip),NOT(User.CTypeBotRightSnip))'/><Cell N='Checked' V='0'/><Cell N='Disabled' V='0'/><Cell N='ReadOnly' V='0'/><Cell N='Invisible' V='1'/><Cell N='BeginGroup' V='0'/><Cell N='FlyoutChild' V='1'/><Cell N='TagName' V=''/><Cell N='ButtonFace' V=''/><Cell N='SortKey' V=''/></Row><Row N='LockHoriz'><Cell N='Menu' V='UnLock Corners &amp;Horizontally' F='IF(User.CornerLockHoriz,"UnLock","Lock")&amp;" Corners &amp;Horizontally"'/><Cell N='Action' V='0' F='IF(User.CornerLockHoriz,0,SETF(GetRef(User.CornerLockDiag),FALSE))+SETF(GetRef(User.CornerLockHoriz),NOT(User.CornerLockHoriz))'/><Cell N='Checked' V='0'/><Cell N='Disabled' V='0'/><Cell N='ReadOnly' V='0'/><Cell N='Invisible' V='1'/><Cell N='BeginGroup' V='0'/><Cell N='FlyoutChild' V='0'/><Cell N='TagName' V=''/><Cell N='ButtonFace' V=''/><Cell N='SortKey' V=''/></Row><Row N='LockVert'><Cell N='Menu' V='UnLock Corners &amp;Vertically' F='IF(User.CornerLockVert,"UnLock","Lock")&amp;" Corners &amp;Vertically"'/><Cell N='Action' V='0' F='IF(User.CornerLockVert,0,SETF(GetRef(User.CornerLockDiag),FALSE))+SETF(GetRef(User.CornerLockVert),NOT(User.CornerLockVert))'/><Cell N='Checked' V='0'/><Cell N='Disabled' V='0'/><Cell N='ReadOnly' V='0'/><Cell N='Invisible' V='1'/><Cell N='BeginGroup' V='0'/><Cell N='FlyoutChild' V='0'/><Cell N='TagName' V=''/><Cell N='ButtonFace' V=''/><Cell N='SortKey' V=''/></Row><Row N='LockDiag'><Cell N='Menu' V='Lock Corners &amp;Diagonally' F='IF(User.CornerLockDiag,"UnLock","Lock")&amp;" Corners &amp;Diagonally"'/><Cell N='Action' V='0' F='IF(User.CornerLockDiag,0,SETF(GetRef(User.CornerLockVert),FALSE)+SETF(GetRef(User.CornerLockHoriz),FALSE))+SETF(GetRef(User.CornerLockDiag),NOT(User.CornerLockDiag))'/><Cell N='Checked' V='0'/><Cell N='Disabled' V='0'/><Cell N='ReadOnly' V='0'/><Cell N='Invisible' V='1'/><Cell N='BeginGroup' V='0'/><Cell N='FlyoutChild' V='0'/><Cell N='TagName' V=''/><Cell N='ButtonFace' V=''/><Cell N='SortKey' V=''/></Row></Section><Section N='Control'><Row N='TopLeft'><Cell N='X' V='0.1574803149606299' U='MM' F='BOUND(Width*0.1,0,FALSE,0,MIN(Width/2,Height/2))'/><Cell N='Y' V='1.181102362204724' U='MM' F='Height*1'/><Cell N='XDyn' V='0' U='MM' F='Width*0'/><Cell N='YDyn' V='0' U='MM' F='Height*0'/><Cell N='XCon' V='5' F='IF(OR(User.CornerLockHoriz,User.CornerLockDiag),5,0)'/><Cell N='YCon' V='1'/><Cell N='CanGlue' V='0'/><Cell N='Prompt' V='Rounding' F='IF(User.CTypeTopLeftSnip,"Snip Size","Rounding")'/></Row><Row N='TopRight'><Cell N='X' V='1.417322834645669' U='MM' F='BOUND(Width*0.9,0,FALSE,Width,Width-MIN(Width/2,Height/2))'/><Cell N='Y' V='1.181102362204724' U='MM' F='Height*1'/><Cell N='XDyn' V='0' U='MM' F='Width*0'/><Cell N='YDyn' V='0' U='MM' F='Height*0'/><Cell N='XCon' V='0' F='IF(User.CornerLockDiag,5,0)'/><Cell N='YCon' V='1'/><Cell N='CanGlue' V='0'/><Cell N='Prompt' V='Rounding' F='IF(User.CTypeTopRightSnip,"Snip Size","Rounding")'/></Row><Row N='BotLeft'><Cell N='X' V='0.1574803149606299' U='MM' F='BOUND(Width*0.1,0,FALSE,0,MIN(Width/2,Height/2))'/><Cell N='Y' V='0' U='MM' F='Height*0'/><Cell N='XDyn' V='0' U='MM' F='Width*0'/><Cell N='YDyn' V='0' U='MM' F='Height*0'/><Cell N='XCon' V='5' F='IF(OR(User.CornerLockHoriz,User.CornerLockVert),5,0)'/><Cell N='YCon' V='1'/><Cell N='CanGlue' V='0'/><Cell N='Prompt' V='Rounding' F='IF(User.CTypeBotLeftSnip,"Snip Size","Rounding")'/></Row><Row N='BotRight'><Cell N='X' V='1.417322834645669' U='MM' F='BOUND(Width*0.9,0,FALSE,Width,Width-MIN(Width/2,Height/2))'/><Cell N='Y' V='0' U='MM' F='Height*0'/><Cell N='XDyn' V='0' U='MM' F='Width*0'/><Cell N='YDyn' V='0' U='MM' F='Height*0'/><Cell N='XCon' V='5' F='IF(User.CornerLockVert,5,0)'/><Cell N='YCon' V='1'/><Cell N='CanGlue' V='0'/><Cell N='Prompt' V='Rounding' F='IF(User.CTypeBotRightSnip,"Snip Size","Rounding")'/></Row></Section><Section N='Connection'><Row T='Connection' IX='0'><Cell N='X' V='0' U='MM' F='Width*0'/><Cell N='Y' V='0.5905511811023622' U='MM' F='Height*0.5'/><Cell N='DirX' V='0'/><Cell N='DirY' V='0'/><Cell N='Type' V='0'/><Cell N='AutoGen' V='0'/><Cell N='Prompt' V='' F='No Formula'/></Row><Row T='Connection' IX='1'><Cell N='X' V='1.574803149606299' U='MM' F='Width*1'/><Cell N='Y' V='0.5905511811023622' U='MM' F='Height*0.5'/><Cell N='DirX' V='0'/><Cell N='DirY' V='0'/><Cell N='Type' V='0'/><Cell N='AutoGen' V='0'/><Cell N='Prompt' V='' F='No Formula'/></Row><Row T='Connection' IX='2'><Cell N='X' V='0.7874015748031495' U='MM' F='Width*0.5'/><Cell N='Y' V='0' U='MM' F='Height*0'/><Cell N='DirX' V='0'/><Cell N='DirY' V='0'/><Cell N='Type' V='0'/><Cell N='AutoGen' V='0'/><Cell N='Prompt' V='' F='No Formula'/></Row><Row T='Connection' IX='3'><Cell N='X' V='0.7874015748031495' U='MM' F='Width*0.5'/><Cell N='Y' V='1.181102362204724' U='MM' F='Height*1'/><Cell N='DirX' V='0'/><Cell N='DirY' V='0'/><Cell N='Type' V='0'/><Cell N='AutoGen' V='0'/><Cell N='Prompt' V='' F='No Formula'/></Row><Row T='Connection' IX='4'><Cell N='X' V='0.04612598425196848' U='MM' F='IF(User.CTypeTopLeftSnip,0.5,0.2929)*User.TopLeftOffset'/><Cell N='Y' V='1.134976377952756' U='MM' F='Height-IF(User.CTypeTopLeftSnip,0.5,0.2929)*User.TopLeftOffset'/><Cell N='DirX' V='0'/><Cell N='DirY' V='0'/><Cell N='Type' V='0'/><Cell N='AutoGen' V='0'/><Cell N='Prompt' V='' F='No Formula'/></Row><Row T='Connection' IX='5'><Cell N='X' V='1.528677165354331' U='MM' F='Width-IF(User.CTypeTopRightSnip,0.5,0.2929)*User.TopRightOffset'/><Cell N='Y' V='1.134976377952756' U='MM' F='Height-IF(User.CTypeTopRightSnip,0.5,0.2929)*User.TopRightOffset'/><Cell N='DirX' V='0'/><Cell N='DirY' V='0'/><Cell N='Type' V='0'/><Cell N='AutoGen' V='0'/><Cell N='Prompt' V='' F='No Formula'/></Row><Row T='Connection' IX='6'><Cell N='X' V='0.04612598425196848' U='MM' F='IF(User.CTypeBotLeftSnip,0.5,0.2929)*User.BotLeftOffset'/><Cell N='Y' V='0.04612598425196848' U='MM' F='IF(User.CTypeBotLeftSnip,0.5,0.2929)*User.BotLeftOffset'/><Cell N='DirX' V='0'/><Cell N='DirY' V='0'/><Cell N='Type' V='0'/><Cell N='AutoGen' V='0'/><Cell N='Prompt' V='' F='No Formula'/></Row><Row T='Connection' IX='7'><Cell N='X' V='1.528677165354331' U='MM' F='Width-IF(User.CTypeBotRightSnip,0.5,0.2929)*User.BotRightOffset'/><Cell N='Y' V='0.04612598425196848' U='MM' F='IF(User.CTypeBotRightSnip,0.5,0.2929)*User.BotRightOffset'/><Cell N='DirX' V='0'/><Cell N='DirY' V='0'/><Cell N='Type' V='0'/><Cell N='AutoGen' V='0'/><Cell N='Prompt' V='' F='No Formula'/></Row></Section><Section N='Character'><Row IX='0'><Cell N='Size' V='0.1388888888888889' U='PT'/></Row></Section><Section N='Geometry' IX='0'><Cell N='NoFill' V='0'/><Cell N='NoLine' V='0'/><Cell N='NoShow' V='0'/><Cell N='NoSnap' V='0'/><Cell N='NoQuickDrag' V='0'/><Row T='MoveTo' IX='1'><Cell N='X' V='0.1574803149606299' U='MM' F='User.BotLeftOffset'/><Cell N='Y' V='0' U='MM' F='Height*0'/></Row><Row T='LineTo' IX='2'><Cell N='X' V='1.417322834645669' U='MM' F='Width-User.BotRightOffset'/><Cell N='Y' V='0' U='MM' F='Height*0'/></Row><Row T='LineTo' IX='3'><Cell N='X' V='1.417322834645669' U='MM' F='IF(User.CTypeBotRightSnip,Width,Width-User.BotRightOffset)'/><Cell N='Y' V='0' F='IF(User.CTypeBotRightSnip,User.BotRightOffset,0)'/></Row><Row T='ArcTo' IX='4'><Cell N='X' V='1.574803149606299' U='MM' F='Width*1'/><Cell N='Y' V='0.1574803149606299' U='MM' F='User.BotRightOffset'/><Cell N='A' V='0.04612598425196848' U='MM' F='(User.BotRightOffset)*0.2929'/></Row><Row T='LineTo' IX='5'><Cell N='X' V='1.574803149606299' U='MM' F='Width*1'/><Cell N='Y' V='1.023622047244094' U='MM' F='Height-User.TopRightOffset'/></Row><Row T='ArcTo' IX='6'><Cell N='X' V='1.417322834645669' U='MM' F='IF(User.CTypeTopRightSnip,Width,Width-User.TopRightOffset)'/><Cell N='Y' V='1.181102362204724' U='MM' F='IF(User.CTypeTopRightSnip,Height-User.TopRightOffset,Height)'/><Cell N='A' V='0.04612598425196848' U='MM' F='User.TopRightOffset*0.2929'/></Row><Row T='LineTo' IX='7'><Cell N='X' V='1.417322834645669' U='MM' F='Width-User.TopRightOffset'/><Cell N='Y' V='1.181102362204724' U='MM' F='Height*1'/></Row><Row T='LineTo' IX='8'><Cell N='X' V='0.1574803149606299' U='MM' F='User.TopLeftOffset'/><Cell N='Y' V='1.181102362204724' U='MM' F='Height*1'/></Row><Row T='LineTo' IX='9'><Cell N='X' V='0.1574803149606299' U='MM' F='IF(User.CTypeTopLeftSnip,0,User.TopLeftOffset)'/><Cell N='Y' V='1.181102362204724' U='MM' F='IF(User.CTypeTopLeftSnip,Height-User.TopLeftOffset,Height)'/></Row><Row T='ArcTo' IX='10'><Cell N='X' V='0' U='MM' F='Width*0'/><Cell N='Y' V='1.023622047244094' U='MM' F='Height-User.TopLeftOffset'/><Cell N='A' V='0.04612598425196848' U='MM' F='User.TopLeftOffset*0.2929'/></Row><Row T='LineTo' IX='11'><Cell N='X' V='0' U='MM' F='Width*0'/><Cell N='Y' V='0.1574803149606299' U='MM' F='User.BotLeftOffset'/></Row><Row T='ArcTo' IX='12'><Cell N='X' V='0.1574803149606299' U='MM' F='IF(User.CTypeBotLeftSnip,0,User.BotLeftOffset)'/><Cell N='Y' V='0' F='IF(User.CTypeBotLeftSnip,User.BotLeftOffset,0)'/><Cell N='A' V='0.04612598425196848' U='MM' F='User.BotLeftOffset*0.2929'/></Row><Row T='LineTo' IX='13'><Cell N='X' V='0.1574803149606299' U='MM' F='Geometry1.X1'/><Cell N='Y' V='0' U='MM' F='Geometry1.Y1'/></Row></Section></Shape></Shapes></MasterContents>
