# Supplementary material for: Adjusting eye aspect ratio for strong eye blink detection based on facial landmarks
Source: PeerJ Comput Sci. 2022 Apr 18;8:e943. doi: 10.7717/peerj-cs.943 (PMC9044337; doi:10.7717/peerj-cs.943)
Supplement: Supplemental Information 8 [file peerj-cs-08-943-s008.vsdx › visio/masters/master3.xml]

<?xml version='1.0' encoding='utf-8' ?>
<MasterContents xmlns='http://schemas.microsoft.com/office/visio/2012/main' xmlns:r='http://schemas.openxmlformats.org/officeDocument/2006/relationships' xml:space='preserve'><Shapes><Shape ID='5' Type='Shape' LineStyle='7' FillStyle='7' TextStyle='7' UniqueID='{B73F33F1-A74B-447A-926B-F0997F1B61F1}'><Cell N='PinX' V='2' U='IN'/><Cell N='PinY' V='2' U='IN'/><Cell N='Width' V='1' U='IN' F='User.DefaultWidth'/><Cell N='Height' V='0.375' U='IN' F='User.ResizeTxtHeight'/><Cell N='LocPinX' V='0.5' U='IN' F='Width*0.5'/><Cell N='LocPinY' V='0.1875' U='IN' F='Height*0.5'/><Cell N='Angle' V='0' U='DEG'/><Cell N='FlipX' V='0'/><Cell N='FlipY' V='0'/><Cell N='ResizeMode' V='0'/><Cell N='EventDblClick' V='0' F='OPENTEXTWIN()'/><Cell N='TxtPinX' V='0.5' U='IN' F='Width*0.5'/><Cell N='TxtPinY' V='0.1875' U='IN' F='Height*0.5'/><Cell N='TxtWidth' V='1' U='IN' F='Width*1'/><Cell N='TxtHeight' V='0.375' U='IN' F='Height*1'/><Cell N='TxtLocPinX' V='0.5' U='IN' F='TxtWidth*0.5'/><Cell N='TxtLocPinY' V='0.1875' U='IN' F='TxtHeight*0.5'/><Cell N='TxtAngle' V='0' U='DEG'/><Cell N='HelpTopic' V='Vis_PRXY.chm!#59003'/><Cell N='Copyright' V='Copyright (c) 2012 Microsoft Corporation.  All rights reserved.'/><Cell N='LockCalcWH' V='1'/><Cell N='LayerMember' V='0'/><Cell N='ObjType' V='1'/><Cell N='ShapeSplit' V='1'/><Cell N='QuickStyleLineColor' V='102'/><Cell N='QuickStyleFillColor' V='102'/><Cell N='QuickStyleShadowColor' V='102'/><Cell N='QuickStyleFontColor' V='102'/><Cell N='QuickStyleLineMatrix' V='102'/><Cell N='QuickStyleFillMatrix' V='102'/><Cell N='QuickStyleEffectsMatrix' V='102'/><Cell N='QuickStyleFontMatrix' V='102'/><Section N='Property'><Row N='Cost'><Cell N='Value' V='0' F='No Formula'/><Cell N='Prompt' V=''/><Cell N='Label' V='Cost'/><Cell N='Format' V='@'/><Cell N='SortKey' V=''/><Cell N='Type' V='7'/><Cell N='Invisible' V='0'/><Cell N='Verify' V='0'/><Cell N='DataLinked' V='0' F='No Formula'/><Cell N='LangID' V='en-US'/><Cell N='Calendar' V='0'/></Row><Row N='ProcessNumber'><Cell N='Value' V='0' F='No Formula'/><Cell N='Prompt' V=''/><Cell N='Label' V='Process Number'/><Cell N='Format' V=''/><Cell N='SortKey' V=''/><Cell N='Type' V='2'/><Cell N='Invisible' V='0'/><Cell N='Verify' V='0'/><Cell N='DataLinked' V='0' F='No Formula'/><Cell N='LangID' V='en-US'/><Cell N='Calendar' V='0'/></Row><Row N='Owner'><Cell N='Value' V='0' F='No Formula'/><Cell N='Prompt' V=''/><Cell N='Label' V='Owner'/><Cell N='Format' V=''/><Cell N='SortKey' V=''/><Cell N='Type' V='0'/><Cell N='Invisible' V='0'/><Cell N='Verify' V='0'/><Cell N='DataLinked' V='0' F='No Formula'/><Cell N='LangID' V='en-US'/><Cell N='Calendar' V='0'/></Row><Row N='Function'><Cell N='Value' V='' U='STR' F='IFERROR(CONTAINERSHEETREF(1,"Swimlane")!User.VISHEADINGTEXT,"")'/><Cell N='Prompt' V=''/><Cell N='Label' V='Function'/><Cell N='Format' V=''/><Cell N='SortKey' V=''/><Cell N='Type' V='0'/><Cell N='Invisible' V='0'/><Cell N='Verify' V='0'/><Cell N='DataLinked' V='0' F='No Formula'/><Cell N='LangID' V='en-US'/><Cell N='Calendar' V='0'/></Row><Row N='StartDate'><Cell N='Value' V='0' F='No Formula'/><Cell N='Prompt' V=''/><Cell N='Label' V='Start Date'/><Cell N='Format' V=''/><Cell N='SortKey' V=''/><Cell N='Type' V='5'/><Cell N='Invisible' V='0'/><Cell N='Verify' V='0'/><Cell N='DataLinked' V='0' F='No Formula'/><Cell N='LangID' V='en-US'/><Cell N='Calendar' V='0'/></Row><Row N='EndDate'><Cell N='Value' V='0' F='No Formula'/><Cell N='Prompt' V=''/><Cell N='Label' V='End Date'/><Cell N='Format' V=''/><Cell N='SortKey' V=''/><Cell N='Type' V='5'/><Cell N='Invisible' V='0'/><Cell N='Verify' V='0'/><Cell N='DataLinked' V='0' F='No Formula'/><Cell N='LangID' V='en-US'/><Cell N='Calendar' V='0'/></Row><Row N='Status'><Cell N='Value' V='' U='STR' F='INDEX(0,Prop.Status.Format)'/><Cell N='Prompt' V=''/><Cell N='Label' V='Status'/><Cell N='Format' V=';Not Started;In Progress;Completed;Deferred;Waiting on Input'/><Cell N='SortKey' V=''/><Cell N='Type' V='4'/><Cell N='Invisible' V='0'/><Cell N='Verify' V='0'/><Cell N='DataLinked' V='0' F='No Formula'/><Cell N='LangID' V='en-US'/><Cell N='Calendar' V='0'/></Row></Section><Section N='Connection'><Row T='Connection' IX='0'><Cell N='X' V='0.5' U='IN' F='Width*0.5'/><Cell N='Y' V='0' U='IN' F='Height*0'/><Cell N='DirX' V='0' F='No Formula'/><Cell N='DirY' V='0' F='No Formula'/><Cell N='Type' V='0' F='No Formula'/><Cell N='AutoGen' V='0' F='No Formula'/><Cell N='Prompt' V='' F='No Formula'/></Row><Row T='Connection' IX='1'><Cell N='X' V='0.5' U='IN' F='Width*0.5'/><Cell N='Y' V='0.375' U='IN' F='Height*1'/><Cell N='DirX' V='0' F='No Formula'/><Cell N='DirY' V='0' F='No Formula'/><Cell N='Type' V='0' F='No Formula'/><Cell N='AutoGen' V='0' F='No Formula'/><Cell N='Prompt' V='' F='No Formula'/></Row><Row T='Connection' IX='2'><Cell N='X' V='0' U='IN' F='Geometry1.A5'/><Cell N='Y' V='0.1874999999999963' U='IN' F='Height*0.49999999999999'/><Cell N='DirX' V='0' F='No Formula'/><Cell N='DirY' V='0' F='No Formula'/><Cell N='Type' V='0' F='No Formula'/><Cell N='AutoGen' V='0' F='No Formula'/><Cell N='Prompt' V='' F='No Formula'/></Row><Row T='Connection' IX='3'><Cell N='X' V='1' U='IN' F='Geometry1.A3'/><Cell N='Y' V='0.1874999999999963' U='IN' F='Height*0.49999999999999'/><Cell N='DirX' V='0' F='No Formula'/><Cell N='DirY' V='0' F='No Formula'/><Cell N='Type' V='0' F='No Formula'/><Cell N='AutoGen' V='0' F='No Formula'/><Cell N='Prompt' V='' F='No Formula'/></Row></Section><Section N='Actions'><Row N='Row_1'><Cell N='Menu' V='%P&amp;roperties'/><Cell N='Action' V='0' F='RUNADDON("NETWORK SHAPE PROPERTIES")'/><Cell N='Checked' V='0' F='No Formula'/><Cell N='Disabled' V='0' F='No Formula'/><Cell N='ReadOnly' V='0' F='No Formula'/><Cell N='Invisible' V='0' F='No Formula'/><Cell N='BeginGroup' V='0' F='No Formula'/><Cell N='FlyoutChild' V='0' F='No Formula'/><Cell N='TagName' V='' F='No Formula'/><Cell N='ButtonFace' V='' F='No Formula'/><Cell N='SortKey' V='' F='No Formula'/></Row><Row N='SetDefaultSize'><Cell N='Menu' V='Set to Default Si&amp;ze'/><Cell N='Action' V='0' F='SETF(GetRef(Width),User.DefaultWidth)+SETF(GetRef(Height),User.DefaultHeight)'/><Cell N='Checked' V='0'/><Cell N='Disabled' V='0'/><Cell N='ReadOnly' V='0'/><Cell N='Invisible' V='1' F='AND(Height=User.DefaultHeight,Width=User.DefaultWidth)'/><Cell N='BeginGroup' V='0'/><Cell N='FlyoutChild' V='0'/><Cell N='TagName' V=''/><Cell N='ButtonFace' V=''/><Cell N='SortKey' V=''/></Row><Row N='ResizeWithText'><Cell N='Menu' V='Resize with Te&amp;xt'/><Cell N='Action' V='0' F='SETF(GetRef(Height),"User.ResizeTxtHeight")'/><Cell N='Checked' V='0'/><Cell N='Disabled' V='0'/><Cell N='ReadOnly' V='0'/><Cell N='Invisible' V='1' F='IF(Height=User.ResizeTxtHeight,TRUE,FALSE)'/><Cell N='BeginGroup' V='0'/><Cell N='FlyoutChild' V='0'/><Cell N='TagName' V=''/><Cell N='ButtonFace' V=''/><Cell N='SortKey' V=''/></Row></Section><Section N='User'><Row N='visVersion'><Cell N='Value' V='15'/><Cell N='Prompt' V=''/></Row><Row N='DefaultWidth'><Cell N='Value' V='1' U='IN' F='1IN*DropOnPageScale'/><Cell N='Prompt' V=''/></Row><Row N='DefaultHeight'><Cell N='Value' V='0.375' U='IN' F='0.375IN*DropOnPageScale'/><Cell N='Prompt' V=''/></Row><Row N='ResizeTxtHeight'><Cell N='Value' V='0.375' U='IN' F='MAX(User.DefaultHeight,CEILING(TEXTHEIGHT(TheText,TxtWidth),0.075))'/><Cell N='Prompt' V=''/></Row></Section><Section N='Geometry' IX='0'><Cell N='NoFill' V='0'/><Cell N='NoLine' V='0' F='No Formula'/><Cell N='NoShow' V='0' F='No Formula'/><Cell N='NoSnap' V='0' F='No Formula'/><Cell N='NoQuickDrag' V='0' F='No Formula'/><Row T='MoveTo' IX='1'><Cell N='X' V='0.1875' U='IN' F='MIN(Height/2,Width/4)'/><Cell N='Y' V='0' U='IN'/></Row><Row T='LineTo' IX='2'><Cell N='X' V='0.8125' U='IN' F='Width-Geometry1.X1'/><Cell N='Y' V='0' U='IN'/></Row><Row T='EllipticalArcTo' IX='3'><Cell N='X' V='0.8125' U='IN' F='Geometry1.X2'/><Cell N='Y' V='0.375' U='IN' F='Geometry1.Y4'/><Cell N='A' V='1' U='IN' F='Width'/><Cell N='B' V='0.1874999999999963' U='IN' F='Height*0.49999999999999'/><Cell N='C' V='0' U='DA'/><Cell N='D' V='1' F='2*Geometry1.X1/Height'/></Row><Row T='LineTo' IX='4'><Cell N='X' V='0.1875' U='IN' F='Geometry1.X1'/><Cell N='Y' V='0.375' U='IN' F='Height'/></Row><Row T='EllipticalArcTo' IX='5'><Cell N='X' V='0.1875' U='IN' F='Geometry1.X1'/><Cell N='Y' V='0' U='IN' F='Geometry1.Y1'/><Cell N='A' V='0' U='IN'/><Cell N='B' V='0.1874999999999963' U='IN' F='Height*0.49999999999999'/><Cell N='C' V='0' U='DA'/><Cell N='D' V='1' F='Geometry1.D3'/></Row></Section><Text/></Shape></Shapes></MasterContents>
