# Supplementary material for: Adjusting eye aspect ratio for strong eye blink detection based on facial landmarks
Source: PeerJ Comput Sci. 2022 Apr 18;8:e943. doi: 10.7717/peerj-cs.943 (PMC9044337; doi:10.7717/peerj-cs.943)
Supplement: Supplemental Information 8 [file peerj-cs-08-943-s008.vsdx › visio/masters/master7.xml]

<?xml version='1.0' encoding='utf-8' ?>
<MasterContents xmlns='http://schemas.microsoft.com/office/visio/2012/main' xmlns:r='http://schemas.openxmlformats.org/officeDocument/2006/relationships' xml:space='preserve'><Shapes><Shape ID='5' Type='Shape' LineStyle='3' FillStyle='3' TextStyle='3'><Cell N='PinX' V='2.75' U='IN' F='GUARD(Width/2)'/><Cell N='PinY' V='2.125' U='IN' F='GUARD(Height/2)'/><Cell N='Width' V='5.5' U='IN' F='GUARD(ThePage!PageWidth)'/><Cell N='Height' V='4.25' U='IN' F='GUARD(ThePage!PageHeight)'/><Cell N='LocPinX' V='2.75' U='IN' F='Width*0.5'/><Cell N='LocPinY' V='2.125' U='IN' F='Height*0.5'/><Cell N='Angle' V='0'/><Cell N='FlipX' V='0'/><Cell N='FlipY' V='0'/><Cell N='ResizeMode' V='0'/><Cell N='LinePattern' V='0' F='GUARD(0)'/><Cell N='FillPattern' V='40' F='GUARD(40)'/><Cell N='GlueType' V='8'/><Cell N='LockWidth' V='1'/><Cell N='LockHeight' V='1'/><Cell N='LockMoveX' V='1'/><Cell N='LockMoveY' V='1'/><Cell N='LockRotate' V='1'/><Cell N='LockTextEdit' V='1'/><Cell N='LockReplace' V='1'/><Cell N='EventDblClick' V='0' F='NA()'/><Cell N='EventDrop' V='0' F='RUNADDON("Make Background")+SETF("EventDrop",0)'/><Cell N='HelpTopic' V='Vis_PRXY.chm!#60259'/><Cell N='Copyright' V='Copyright (c) 2012 Microsoft Corporation.  All rights reserved.'/><Cell N='DisplayLevel' V='-32000'/><Cell N='FillGradientDir' V='3' F='GUARD(3)'/><Cell N='FillGradientEnabled' V='1' F='GUARD(TRUE)'/><Cell N='UseGroupGradient' V='0' F='GUARD(FALSE)'/><Cell N='EffectSchemeIndex' V='0'/><Cell N='QuickStyleEffectsMatrix' V='0' F='GUARD(0)'/><Section N='User'><Row N='Background'><Cell N='Value' V='0'/><Cell N='Prompt' V='' F='No Formula'/></Row><Row N='visVersion'><Cell N='Value' V='15'/><Cell N='Prompt' V='' F='No Formula'/></Row><Row N='msvShapeCategories'><Cell N='Value' V='DoNotContain' U='STR'/><Cell N='Prompt' V=''/></Row></Section><Section N='FillGradient'><Row IX='0'><Cell N='GradientStopColor' V='#ffffff' F='IF(ISTHEMED(),TINT(THEMEVAL(QuickStyleFillColor),80),RGB(255,255,255))'/><Cell N='GradientStopColorTrans' V='0'/><Cell N='GradientStopPosition' V='0'/></Row><Row IX='1'><Cell N='GradientStopColor' V='#b4b4b4' F='IF(ISTHEMED(),TINT(THEMEVAL(QuickStyleFillColor),50),RGB(180,180,180))'/><Cell N='GradientStopColorTrans' V='0'/><Cell N='GradientStopPosition' V='1'/></Row><Row IX='2' Del='1'/><Row IX='3' Del='1'/><Row IX='4' Del='1'/><Row IX='5' Del='1'/><Row IX='6' Del='1'/><Row IX='7' Del='1'/><Row IX='8' Del='1'/><Row IX='9' Del='1'/></Section><Section N='Geometry' IX='0'><Cell N='NoFill' V='0'/><Cell N='NoLine' V='0'/><Cell N='NoShow' V='0'/><Cell N='NoSnap' V='0'/><Cell N='NoQuickDrag' V='0' F='No Formula'/><Row T='MoveTo' IX='1'><Cell N='X' V='0' U='IN' F='Width*0'/><Cell N='Y' V='0' U='IN' F='Height*0'/></Row><Row T='LineTo' IX='2'><Cell N='X' V='5.5' U='IN' F='Width*1'/><Cell N='Y' V='0' U='IN' F='Height*0'/></Row><Row T='LineTo' IX='3'><Cell N='X' V='5.5' U='IN' F='Width*1'/><Cell N='Y' V='4.25' U='IN' F='Height*1'/></Row><Row T='LineTo' IX='4'><Cell N='X' V='0' U='IN' F='Width*0'/><Cell N='Y' V='4.25' U='IN' F='Height*1'/></Row><Row T='LineTo' IX='5'><Cell N='X' V='0' U='IN' F='Geometry1.X1'/><Cell N='Y' V='0' U='IN' F='Geometry1.Y1'/></Row></Section></Shape></Shapes></MasterContents>
