# Supplementary material for: Adjusting eye aspect ratio for strong eye blink detection based on facial landmarks
Source: PeerJ Comput Sci. 2022 Apr 18;8:e943. doi: 10.7717/peerj-cs.943 (PMC9044337; doi:10.7717/peerj-cs.943)
Supplement: Supplemental Information 8 [file peerj-cs-08-943-s008.vsdx › visio/masters/masters.xml]

<?xml version='1.0' encoding='utf-8' ?>
<Masters xmlns='http://schemas.microsoft.com/office/visio/2012/main' xmlns:r='http://schemas.openxmlformats.org/officeDocument/2006/relationships' xml:space='preserve'><Master ID='2' NameU='Dynamic connector' IsCustomNameU='1' Name='Dynamic connector' IsCustomName='1' Prompt='This connector automatically routes between the shapes it connects.' IconSize='1' AlignName='2' MatchByName='1' IconUpdate='0' UniqueID='{002A9108-0000-0000-8E40-00608CF305B2}' BaseID='{F7290A45-E3AD-11D2-AE4F-006008C9F5A9}' PatternFlags='0' Hidden='0' MasterType='541'><PageSheet LineStyle='0' FillStyle='0' TextStyle='0'><Cell N='PageWidth' V='3'/><Cell N='PageHeight' V='3'/><Cell N='ShdwOffsetX' V='0.125'/><Cell N='ShdwOffsetY' V='-0.125'/><Cell N='PageScale' V='1' U='IN_F'/><Cell N='DrawingScale' V='1' U='IN_F'/><Cell N='DrawingSizeType' V='4'/><Cell N='DrawingScaleType' V='0'/><Cell N='InhibitSnap' V='0'/><Cell N='PageLockReplace' V='0' U='BOOL'/><Cell N='PageLockDuplicate' V='0' U='BOOL'/><Cell N='UIVisibility' V='0'/><Cell N='ShdwType' V='0'/><Cell N='ShdwObliqueAngle' V='0'/><Cell N='ShdwScaleFactor' V='1'/><Cell N='DrawingResizeType' V='0'/><Section N='Layer'><Row IX='0'><Cell N='Name' V='Connector'/><Cell N='Color' V='255'/><Cell N='Status' V='0'/><Cell N='Visible' V='1'/><Cell N='Print' V='1'/><Cell N='Active' V='0'/><Cell N='Lock' V='0'/><Cell N='Snap' V='1'/><Cell N='Glue' V='1'/><Cell N='NameUniv' V='Connector'/><Cell N='ColorTrans' V='0'/></Row></Section></PageSheet><Icon>
AAABAAEAICAQAAAAAADoAgAAFgAAACgAAAAgAAAAQAAAAAEABAAAAAAAgAIAAAAAAAAAAAAAAAAAA
AAAAAAAAAAAAACAAACAAAAAgIAAgAAAAIAAgACAgAAAgICAAMDAwAAAAP8AAP8AAAD//wD/AAAA/w
D/AP//AAD///8AAAAAAAAAAAAAAAAAAAAAAAAAAAAAAAAAAAAAAAAAAAAAAAAAAAAAAAAAAAAAAAA
AAAAAAAeHh4eAAAAAAAAAAAAAAAAIAAAAcAAAAAAAAAAAAAADNzMzAIAAAAAAAAAAAAAAAAAAAwBw
AAAAAAAAAAAAAw///wMAgAAAAAAAAAAAAHgP//8IeHh4eHh4eHAAAACAD/n/AwCAAAAAAACAAAAAc
ACZkAAAcAAAAAAAcAAAAIAACTAAAIAAAAAAAIAAAABwAAAAAABwAAAAAABwAAAAgAAAMAAAgAAAAA
AAgAAAAHAAADMzM3MzMzMAAHAAAACAAAAAAAAAAAADAACAAAAAcAAAAAAAcAAAAwAAcAAAAIAAAAA
AAIAAAAMAAIAAAABwAAAAAABwAAADAABwAAAAgAAAAAAAgAAAAwAAgAAAAHAAAAAAAHAAM5MzMHAA
AACAAAAAAACAAAmZADCAAAAAcAAAAAAAcAD/n/AwcAAAAIeHh4eHh4eA///wh4AAAAAAAAAAAABwA
P//8DAAAAAAAAAAAAAAgAAAAAAAAAAAAAAAAAAAAHAAAHAAAAAAAAAAAAAAAACAAACAAAAAAAAAAA
AAAAAAeHh4cAAAAAAAAAAAAAAAAAAAAAAAAAAAAAAAAAAAAAAAAAAAAAAAAAAAAAAAAAAAAAAAAAA
AAAD/////////////////gH///79///4Df//8A3//+AN///AAAAf0A3/39Ad/9/eff/f3H3/3959/
9/eAAPf3gAD39/989/f/fPf3/3z39/989/f/cBf3/2AX9/9gF/AAAAf//2Af//9gP///ff///33//
/8B/////////////////w==</Icon><Rel r:id='rId1'/></Master><Master ID='8' NameU='Rounded Rectangle' IsCustomNameU='1' Name='Rounded Rectangle' IsCustomName='1' Prompt='Drag onto the page, then use the yellow squares to modify the shape.' IconSize='1' AlignName='2' MatchByName='0' IconUpdate='1' UniqueID='{08843001-001C-0000-8E40-00608CF305B2}' BaseID='{AFF00793-3181-49B8-85EB-B927470BDD0A}' PatternFlags='0' Hidden='0' MasterType='2'><PageSheet LineStyle='0' FillStyle='0' TextStyle='0'><Cell N='PageWidth' V='3.937007874015748' U='MM'/><Cell N='PageHeight' V='3.937007874015748' U='MM'/><Cell N='ShdwOffsetX' V='0.1181102362204724'/><Cell N='ShdwOffsetY' V='-0.1181102362204724'/><Cell N='PageScale' V='0.03937007874015748' U='MM'/><Cell N='DrawingScale' V='0.03937007874015748' U='MM'/><Cell N='DrawingSizeType' V='0'/><Cell N='DrawingScaleType' V='0'/><Cell N='InhibitSnap' V='0'/><Cell N='PageLockReplace' V='0' U='BOOL'/><Cell N='PageLockDuplicate' V='0' U='BOOL'/><Cell N='UIVisibility' V='0'/><Cell N='ShdwType' V='0'/><Cell N='ShdwObliqueAngle' V='0'/><Cell N='ShdwScaleFactor' V='1'/><Cell N='DrawingResizeType' V='1'/><Cell N='ShapeKeywords' V='two,sides,double,cut,round,curved,uniform'/></PageSheet><Icon>
AAABAAEAICAQAAAAAADoAgAAFgAAACgAAAAgAAAAQAAAAAEABAAAAAAAgAIAAAAAAAAAAAAAAAAAA
AAAAAAAAAAAAACAAACAAAAAgIAAgAAAAIAAgACAgAAAgICAAMDAwAAAAP8AAP8AAAD//wD/AAAA/w
D/AP//AAD///8AAAAAAAAAAAAAAAAAAAAAAAAAAAAAAAAAAAAAAAAAAAAAAAAAAAAAAAAAAAAAAAA
AAAAAAAAAAAAAAAAAAAAAAAAAAAAAAAAAAAAAAAAAAAAACIiIiIiIiIiIiIiIiIcAAP//////////
////////AAD//////////////////3AA//////////////////9wAP//////////////////cAD//
////////////////3AA//////////////////9wAP//////////////////cAD///////////////
///3AA//////////////////9wAP//////////////////cAD//////////////////3AA///////
///////////9wAP//////////////////cAD//////////////////3AA//////////////////9w
AP//////////////////cAD//////////////////3AA//////////////////9wAP///////////
///////cAD//////////////////wAAB3d3d3d3d3d3d3d3d3AAAAAAAAAAAAAAAAAAAAAAAAAAAA
AAAAAAAAAAAAAAAAAAAAAAAAAAAAAAAAAAAAAAAAAAAAAAAAAAAAAAAAAAAAAAAAAAAAAAAAAAAAA
AAAD/////////////////////4AAAB+AAAAOAAAABwAAAAcAAAAHAAAABwAAAAcAAAAHAAAABwAAA
AcAAAAHAAAABwAAAAcAAAAHAAAABwAAAAcAAAAHAAAABwAAAAcAAAAGAAAABgAAAAcAAAAP//////
////////////////////w==</Icon><Rel r:id='rId2'/></Master><Master ID='10' NameU='Start/End.10' Name='Start/End.10' Prompt='Drag onto the page to indicate the beginning or end of a program flow.' IconSize='1' AlignName='2' MatchByName='0' IconUpdate='1' UniqueID='{28795F81-0006-0000-8E40-00608CF305B2}' BaseID='{2260FB21-E7DE-4F61-949E-679548813B45}' PatternFlags='0' Hidden='0' MasterType='2'><PageSheet LineStyle='0' FillStyle='0' TextStyle='0'><Cell N='PageWidth' V='4' U='IN'/><Cell N='PageHeight' V='4' U='IN'/><Cell N='ShdwOffsetX' V='0.125' U='IN'/><Cell N='ShdwOffsetY' V='-0.125' U='IN'/><Cell N='PageScale' V='1' U='IN'/><Cell N='DrawingScale' V='1' U='IN'/><Cell N='DrawingSizeType' V='4'/><Cell N='DrawingScaleType' V='0'/><Cell N='InhibitSnap' V='0'/><Cell N='PageLockReplace' V='0' U='BOOL'/><Cell N='PageLockDuplicate' V='0' U='BOOL'/><Cell N='UIVisibility' V='0'/><Cell N='ShdwType' V='0'/><Cell N='ShdwObliqueAngle' V='0'/><Cell N='ShdwScaleFactor' V='1'/><Cell N='DrawingResizeType' V='1'/><Cell N='PrintPageOrientation' V='0'/><Cell N='PaperKind' V='0'/><Cell N='ShapeKeywords' V='Terminator,stop,begin,end,initial,finish,start,program,flow,basic,flowchart,information,data,business,process,six,6,sigma,iSO,9000'/><Section N='Layer'><Row IX='0'><Cell N='Name' V='Flowchart'/><Cell N='Color' V='255'/><Cell N='Status' V='0'/><Cell N='Visible' V='1'/><Cell N='Print' V='1'/><Cell N='Active' V='0'/><Cell N='Lock' V='0'/><Cell N='Snap' V='1'/><Cell N='Glue' V='1'/><Cell N='NameUniv' V='Flowchart'/><Cell N='ColorTrans' V='0' F='No Formula'/></Row></Section></PageSheet><Icon>
AAABAAEAICAQAAAAAADoAgAAFgAAACgAAAAgAAAAQAAAAAEABAAAAAAAgAIAAAAAAAAAAAAAAAAAA
AAAAAAAAAAAAACAAACAAAAAgIAAgAAAAIAAgACAgAAAgICAAMDAwAAAAP8AAP8AAAD//wD/AAAA/w
D/AP//AAD///8AAAAAAAAAAAAAAAAAAAAAAAAAAAAAAAAAAAAAAAAAAAAAAAAAAAAAAAAAAAAAAAA
AAAAAAAAAAAAAAAAAAAAAAAAAAAAAAAAAAAAAAAAAAAAAAAAAAAAAAAAAAAAAAAAAAAAAAAAAAAAA
AAAAAAAAAAAAAAAAAAAAAAAAAAAAAAAAAAAAAAAAAAAAAAAAAAAAAAAAAAAAAAAAAAAAAAAAAAAAA
AAAAAAAAAAAAAAAAAAAAI//////////////+AAAAA/////////////////wAACP//////////////
///wAA//////////////////8AAP//////////////////cAD//////////////////3AA///////
///////////8AAI/////////////////4AAAI////////////////8AAAAHj/////////////hwAA
AAAAAAAAAAAAAAAAAAAAAAAAAAAAAAAAAAAAAAAAAAAAAAAAAAAAAAAAAAAAAAAAAAAAAAAAAAAAA
AAAAAAAAAAAAAAAAAAAAAAAAAAAAAAAAAAAAAAAAAAAAAAAAAAAAAAAAAAAAAAAAAAAAAAAAAAAAA
AAAAAAAAAAAAAAAAAAAAAAAAAAAAAAAAAAAAAAAAAAAAAAAAAAAAAAAAAAAAAAAAAAAAAAAAAAAAA
AAAD/////////////////////////////////////////////////////8AAAD+AAAAfAAAAHgAAA
AYAAAAHAAAABgAAAAYAAAAHAAAABwAAAA+AAAAf4AAAf/////////////////////////////////
////////////////////w==</Icon><Rel r:id='rId3'/></Master><Master ID='11' NameU='Data.11' Name='Data.11' Prompt='Drag the shape onto the drawing page.' IconSize='1' AlignName='2' MatchByName='0' IconUpdate='1' UniqueID='{28796339-0008-0000-8E40-00608CF305B2}' BaseID='{A1001FFF-BD96-48C2-A3F2-772A4968572C}' PatternFlags='0' Hidden='0' MasterType='2'><PageSheet LineStyle='0' FillStyle='0' TextStyle='0'><Cell N='PageWidth' V='4' U='IN'/><Cell N='PageHeight' V='4' U='IN'/><Cell N='ShdwOffsetX' V='0.125' U='IN'/><Cell N='ShdwOffsetY' V='-0.125' U='IN'/><Cell N='PageScale' V='1' U='IN'/><Cell N='DrawingScale' V='1' U='IN'/><Cell N='DrawingSizeType' V='4'/><Cell N='DrawingScaleType' V='0'/><Cell N='InhibitSnap' V='0'/><Cell N='PageLockReplace' V='0' U='BOOL'/><Cell N='PageLockDuplicate' V='0' U='BOOL'/><Cell N='UIVisibility' V='0'/><Cell N='ShdwType' V='0'/><Cell N='ShdwObliqueAngle' V='0'/><Cell N='ShdwScaleFactor' V='1'/><Cell N='DrawingResizeType' V='1'/><Cell N='PrintPageOrientation' V='0'/><Cell N='PaperKind' V='0'/><Cell N='ShapeKeywords' V='Data,type,flowchart,basic,information,flow,business,process,six,6,sigma,iSO,9000'/><Section N='Layer'><Row IX='0'><Cell N='Name' V='Flowchart'/><Cell N='Color' V='255'/><Cell N='Status' V='0'/><Cell N='Visible' V='1'/><Cell N='Print' V='1'/><Cell N='Active' V='0'/><Cell N='Lock' V='0'/><Cell N='Snap' V='1'/><Cell N='Glue' V='1'/><Cell N='NameUniv' V='Flowchart'/><Cell N='ColorTrans' V='0' F='No Formula'/></Row></Section></PageSheet><Icon>
AAABAAEAICAQAAAAAADoAgAAFgAAACgAAAAgAAAAQAAAAAEABAAAAAAAgAIAAAAAAAAAAAAAAAAAA
AAAAAAAAAAAAACAAACAAAAAgIAAgAAAAIAAgACAgAAAgICAAMDAwAAAAP8AAP8AAAD//wD/AAAA/w
D/AP//AAD///8AAAAAAAAAAAAAAAAAAAAAAAAAAAAAAAAAAAAAAAAAAAAAAAAAAAAAAAAAAAAAAAA
AAAAAAAAAAAAAAAAAAAAAAAAAAAAAAAAAAAAAAAAAAAAAAAAAAAAAAAAAAAAAAAAAAAAAAAAAAAAA
AAAAAAAAAAAAAAAAAAAAAAAAAAAAAAAAiIiIiIiIiIiIiIAAAAAAAH/////////////wAAAAAAAP/
///////////+AAAAAAAB/////////////8AAAAAAAD/////////////gAAAAAAAf/////////////
AAAAAAAA/////////////4AAAAAAAH/////////////wAAAAAAAP////////////+AAAAAAAB////
/////////8AAAAAAAD/////////////gAAAAAAAf/////////////AAAAAAAA/////////////4AA
AAAAAH/////////////wAAAAAAAP////////////+AAAAAAAAHd3d3d3d3d3d3cAAAAAAAAAAAAAA
AAAAAAAAAAAAAAAAAAAAAAAAAAAAAAAAAAAAAAAAAAAAAAAAAAAAAAAAAAAAAAAAAAAAAAAAAAAAA
AAAAAAAAAAAAAAAAAAAAAAAAAAAAAAAAAAAAAAAAAAAAAAAAAAAAAAAAAAAAAAAAAAAAAAAAAAAAA
AAAD/////////////////////////////////////gAAB/4AAAP/AAAH/wAAAf+AAAP/gAAA/8AAA
f/AAAB/4AAA/+AAAD/wAAB/8AAAH/gAAD/4AAAP/AAAH/wAAAf+AAAH//////////////////////
////////////////////w==</Icon><Rel r:id='rId4'/></Master><Master ID='12' NameU='Decision.12' Name='Decision.12' Prompt='Drag the shape onto the drawing page.' IconSize='1' AlignName='2' MatchByName='0' IconUpdate='1' UniqueID='{28795B0F-0004-0000-8E40-00608CF305B2}' BaseID='{7813AA6D-FF4D-4795-B39A-7FF08597892B}' PatternFlags='0' Hidden='0' MasterType='2'><PageSheet LineStyle='0' FillStyle='0' TextStyle='0'><Cell N='PageWidth' V='4' U='IN'/><Cell N='PageHeight' V='4' U='IN'/><Cell N='ShdwOffsetX' V='0.125' U='IN'/><Cell N='ShdwOffsetY' V='-0.125' U='IN'/><Cell N='PageScale' V='1' U='IN'/><Cell N='DrawingScale' V='1' U='IN'/><Cell N='DrawingSizeType' V='4'/><Cell N='DrawingScaleType' V='0'/><Cell N='InhibitSnap' V='0'/><Cell N='PageLockReplace' V='0' U='BOOL'/><Cell N='PageLockDuplicate' V='0' U='BOOL'/><Cell N='UIVisibility' V='0'/><Cell N='ShdwType' V='0'/><Cell N='ShdwObliqueAngle' V='0'/><Cell N='ShdwScaleFactor' V='1'/><Cell N='DrawingResizeType' V='1'/><Cell N='PrintPageOrientation' V='0'/><Cell N='PaperKind' V='0'/><Cell N='ShapeKeywords' V='Decision,Yes/No,flowchart,basic,information,flow,data,business,process,six,6,sigma,iSO,9000'/><Section N='Layer'><Row IX='0'><Cell N='Name' V='Flowchart'/><Cell N='Color' V='255'/><Cell N='Status' V='0'/><Cell N='Visible' V='1'/><Cell N='Print' V='1'/><Cell N='Active' V='0'/><Cell N='Lock' V='0'/><Cell N='Snap' V='1'/><Cell N='Glue' V='1'/><Cell N='NameUniv' V='Flowchart'/><Cell N='ColorTrans' V='0' F='No Formula'/></Row></Section></PageSheet><Icon>
AAABAAEAICAQAAAAAADoAgAAFgAAACgAAAAgAAAAQAAAAAEABAAAAAAAgAIAAAAAAAAAAAAAAAAAA
AAAAAAAAAAAAACAAACAAAAAgIAAgAAAAIAAgACAgAAAgICAAMDAwAAAAP8AAP8AAAD//wD/AAAA/w
D/AP//AAD///8AAAAAAAAAAAAAAAAAAAAAAAAAAAAAAAAAAAAAAAAAAAAAAAAAAAAAAAAAAAAAAAA
AAAAAAAAAAAAAAAAAAAAAAAAAAAAAAAAAAAAAAAAAAAAAAAAAAAAAB3AAAAAAAAAAAAAAAAAAAI/4
AAAAAAAAAAAAAAAAAA////AAAAAAAAAAAAAAAAf/////cAAAAAAAAAAAAACP//////gAAAAAAAAAA
AAP////////8AAAAAAAAAAH//////////9wAAAAAAAAj///////////+AAAAAAACP////////////
/wAAAAAP///////////////3AAAI/////////////////4AAB/////////////////9wAAAI/////
//////////wAAAAAI/////////////4AAAAAAAA////////////cAAAAAAAAAj/////////8AAAAA
AAAAAAj///////+AAAAAAAAAAAAAf//////3AAAAAAAAAAAAAACP////AAAAAAAAAAAAAAAACP//g
AAAAAAAAAAAAAAAAAAP9wAAAAAAAAAAAAAAAAAAAAAAAAAAAAAAAAAAAAAAAAAAAAAAAAAAAAAAAA
AAAAAAAAAAAAAAAAAAAAAAAAAAAAAAAAAAAAAAAAAAAAAAAAAAAAAAAAAAAAAAAAAAAAAAAAAAAAA
AAAD////////////////////////////+P///+B////AP///gA///gAH//wAA//4AAD/4AAAf8AAA
D/AAAAOAAAABwAAAAeAAAAfwAAAP/gAAH/4AAH//AAD//8AB///gB///8A////4f///+f////////
////////////////////w==</Icon><Rel r:id='rId5'/></Master><Master ID='13' NameU='Process.13' Name='Process.13' Prompt='Drag the shape onto the drawing page.' IconSize='1' AlignName='2' MatchByName='0' IconUpdate='1' UniqueID='{2879592B-0002-0000-8E40-00608CF305B2}' BaseID='{15A50647-7503-42A7-8B21-76CD97299D15}' PatternFlags='0' Hidden='0' MasterType='2'><PageSheet LineStyle='0' FillStyle='0' TextStyle='0'><Cell N='PageWidth' V='4' U='IN'/><Cell N='PageHeight' V='4' U='IN'/><Cell N='ShdwOffsetX' V='0.125' U='IN'/><Cell N='ShdwOffsetY' V='-0.125' U='IN'/><Cell N='PageScale' V='1' U='IN'/><Cell N='DrawingScale' V='1' U='IN'/><Cell N='DrawingSizeType' V='4'/><Cell N='DrawingScaleType' V='0'/><Cell N='InhibitSnap' V='0'/><Cell N='PageLockReplace' V='0' U='BOOL'/><Cell N='PageLockDuplicate' V='0' U='BOOL'/><Cell N='UIVisibility' V='0'/><Cell N='ShdwType' V='0'/><Cell N='ShdwObliqueAngle' V='0'/><Cell N='ShdwScaleFactor' V='1'/><Cell N='DrawingResizeType' V='1'/><Cell N='PrintPageOrientation' V='0'/><Cell N='PaperKind' V='0'/><Cell N='ShapeKeywords' V='Process,function,procedure,action,task,basic,flowchart,flow,data,business,six,6,sigma,iSO,9000'/><Section N='Layer'><Row IX='0'><Cell N='Name' V='Flowchart'/><Cell N='Color' V='255'/><Cell N='Status' V='0'/><Cell N='Visible' V='1'/><Cell N='Print' V='1'/><Cell N='Active' V='0'/><Cell N='Lock' V='0'/><Cell N='Snap' V='1'/><Cell N='Glue' V='1'/><Cell N='NameUniv' V='Flowchart'/><Cell N='ColorTrans' V='0' F='No Formula'/></Row></Section></PageSheet><Icon>
AAABAAEAICAQAAAAAADoAgAAFgAAACgAAAAgAAAAQAAAAAEABAAAAAAAgAIAAAAAAAAAAAAAAAAAA
AAAAAAAAAAAAACAAACAAAAAgIAAgAAAAIAAgACAgAAAgICAAMDAwAAAAP8AAP8AAAD//wD/AAAA/w
D/AP//AAD///8AAAAAAAAAAAAAAAAAAAAAAAAAAAAAAAAAAAAAAAAAAAAAAAAAAAAAAAAAAAAAAAA
AAAAAAAAAAAAAAAAAAAAAAAAAAAAAAAAAAAAAAAAAAAAAiIiIiIiIiIiIiIiIiIhwAP//////////
////////cAD//////////////////3AA//////////////////9wAP//////////////////cAD//
////////////////3AA//////////////////9wAP//////////////////cAD///////////////
///3AA//////////////////9wAP//////////////////cAD//////////////////3AA///////
///////////9wAP//////////////////cAD//////////////////3AA//////////////////9w
AP//////////////////cAD//////////////////3AA//////////////////9wAP///////////
///////cAD//////////////////3AAd3d3d3d3d3d3d3d3d3cAAAAAAAAAAAAAAAAAAAAAAAAAAA
AAAAAAAAAAAAAAAAAAAAAAAAAAAAAAAAAAAAAAAAAAAAAAAAAAAAAAAAAAAAAAAAAAAAAAAAAAAAA
AAAD/////////////////////gAAAAYAAAAHAAAABwAAAAcAAAAHAAAABwAAAAcAAAAHAAAABwAAA
AcAAAAHAAAABwAAAAcAAAAHAAAABwAAAAcAAAAHAAAABwAAAAcAAAAHAAAABwAAAAYAAAAH//////
////////////////////w==</Icon><Rel r:id='rId6'/></Master><Master ID='19' NameU='Center Gradient' IsCustomNameU='1' Name='Center Gradient' IsCustomName='1' Prompt='' IconSize='1' AlignName='2' MatchByName='0' IconUpdate='0' UniqueID='{287AA9BA-0008-0000-8E40-00608CF305B2}' BaseID='{FC1BA68C-F389-4B9F-A8D7-20FAE33D54E9}' PatternFlags='0' Hidden='0' MasterType='34'><PageSheet LineStyle='0' FillStyle='0' TextStyle='0'><Cell N='PageWidth' V='5.5' U='IN'/><Cell N='PageHeight' V='4.25' U='IN'/><Cell N='ShdwOffsetX' V='0.125'/><Cell N='ShdwOffsetY' V='-0.125'/><Cell N='PageScale' V='1' U='IN_F'/><Cell N='DrawingScale' V='1' U='IN_F'/><Cell N='DrawingSizeType' V='2'/><Cell N='DrawingScaleType' V='0'/><Cell N='InhibitSnap' V='0'/><Cell N='PageLockReplace' V='0' U='BOOL'/><Cell N='PageLockDuplicate' V='0' U='BOOL'/><Cell N='UIVisibility' V='0'/><Cell N='ShdwType' V='0'/><Cell N='ShdwObliqueAngle' V='0'/><Cell N='ShdwScaleFactor' V='1' F='No Formula'/><Cell N='DrawingResizeType' V='1'/><Cell N='PrintPageOrientation' V='2'/><Section N='User'><Row N='msvSDContainerExcludedCategories'><Cell N='Value' V='DoNotContain' U='STR'/><Cell N='Prompt' V=''/></Row></Section></PageSheet><Icon>
AAABAAEAICAQAAAAAADoAgAAFgAAACgAAAAgAAAAQAAAAAEABAAAAAAAgAIAAAAAAAAAAAAAAAAAA
AAAAAAAAAAAAACAAACAAAAAgIAAgAAAAIAAgACAgAAAgICAAMDAwAAAAP8AAP8AAAD//wD/AAAA/w
D/AP//AAD///8AAAAAAAAAAAAAAAAAAAAAAAAAAAAAAAAAAAAAAAAAAAAAAAAAAAAAAAAAAAAAAAA
AAAAAREREREREREREREAAAAAAAAAAAAAAAAAAAABAAAAAAACIiIiIiIiIiIiAQAAAAAAAiIiIiIiI
iIiIgEAAAAAAAIiIiIiIiIiIiIBAAAAAAACIiIiIiIiIiIiAQAAAAAAAiIiIiIiIiIiIgEAAAAAAA
IiIiIiIiIiIiIBAAAAAAACIiIiIiIiIiIiAQAAAAAAAiIiIiIiIiIiIgEAAAAAAAIiIiIiIiIiIiI
BAAAAAAACIiIiIiIiIiIiAQAAAAAAAiIiIiIiIiIiIgEAAAAAAAIiIiIiIiIiIiIBAAAAAAACIiIi
IiIiIiIiAQAAAAAAAiIiIiIiIiIiIgEAAAAAAAIiIiIiIiIiIiIBAAAAAAACIiIiIiIiIiIiAQAAA
AAAAiIiIiIiIiIiIgEAAAAAAAIiIiIiIiIiIiIBAAAAAAACIiIiIiIiIiIiAQAAAAAAAiIiIiIiIi
IiIgEAAAAAAAIiIiIiIiIiIiIBAAAAAAACIiIiIiIiIiIiAQAAAAAAAiIiIiIiIiIiIgEAAAAAAAA
AAAAAAAAAAAAAAAAAAAAAAAAAAAAAAAAAAAAAAAAAAAAAAAAAAAAAAAAAAAAAAAAAAAAAAAAAAAAA
AAAD////////////////8AAAf+AAAH/gAAB/4AAAf+AAAH/gAAB/4AAAf+AAAH/gAAB/4AAAf+AAA
H/gAAB/4AAAf+AAAH/gAAB/4AAAf+AAAH/gAAB/4AAAf+AAAH/gAAB/4AAAf+AAAH/gAAB/4AAAf+
AAAP////////////////w==</Icon><Rel r:id='rId7'/></Master></Masters>
