# Supplementary material for: Adjusting eye aspect ratio for strong eye blink detection based on facial landmarks
Source: PeerJ Comput Sci. 2022 Apr 18;8:e943. doi: 10.7717/peerj-cs.943 (PMC9044337; doi:10.7717/peerj-cs.943)
Supplement: Supplemental Information 8 [file peerj-cs-08-943-s008.vsdx › visio/pages/page1.xml]

<?xml version='1.0' encoding='utf-8' ?>
<PageContents xmlns='http://schemas.microsoft.com/office/visio/2012/main' xmlns:r='http://schemas.openxmlformats.org/officeDocument/2006/relationships' xml:space='preserve'><Shapes><Shape ID='1' NameU='Center Gradient' Name='Center Gradient' Type='Shape' Master='19'><Cell N='PinX' V='8.25' F='Inh'/><Cell N='PinY' V='5.5' F='Inh'/><Cell N='Width' V='16.5' F='Inh'/><Cell N='Height' V='11' F='Inh'/><Cell N='LocPinX' V='8.25' F='Inh'/><Cell N='LocPinY' V='5.5' F='Inh'/><Cell N='EventDrop' V='0'/><Cell N='EffectSchemeIndex' V='37'/><Cell N='FillForegnd' V='#000000' F='THEMEGUARD(SHADE(FillBkgnd,LUMDIFF(THEMEVAL("FillColor"),THEMEVAL("FillColor2"))))'/><Cell N='FillBkgnd' V='#f2dcda' F='THEMEGUARD(MSOTINT(THEMEVAL("AccentColor"),80))'/><Section N='User'><Row N='msvVisioCreated'><Cell N='Value' V='0'/><Cell N='Prompt' V=''/></Row></Section><Section N='FillGradient'><Row IX='0'><Cell N='GradientStopColor' V='#f1dcda' F='THEMEGUARD(TINT(MSOTINT(THEMEVAL("AccentColor"),80),LUMDIFF(THEMEVAL("FillColor"),THEMEVAL("FillColor2"))*FillGradientStops.GradientStopPosition))'/></Row><Row IX='1'><Cell N='GradientStopColor' V='#ffffff' F='THEMEGUARD(TINT(MSOTINT(THEMEVAL("AccentColor"),80),LUMDIFF(THEMEVAL("FillColor"),THEMEVAL("FillColor2"))*FillGradientStops.GradientStopPosition[2]))'/></Row></Section><Section N='Geometry' IX='0'><Row T='MoveTo' IX='1'><Cell N='X' V='0' F='Inh'/><Cell N='Y' V='0' F='Inh'/></Row><Row T='LineTo' IX='2'><Cell N='X' V='16.5' F='Inh'/><Cell N='Y' V='0' F='Inh'/></Row><Row T='LineTo' IX='3'><Cell N='X' V='16.5' F='Inh'/><Cell N='Y' V='11' F='Inh'/></Row><Row T='LineTo' IX='4'><Cell N='X' V='0' F='Inh'/><Cell N='Y' V='11' F='Inh'/></Row><Row T='LineTo' IX='5'><Cell N='X' V='0' F='Inh'/><Cell N='Y' V='0' F='Inh'/></Row></Section></Shape></Shapes></PageContents>
