# Supplementary material for: Adjusting eye aspect ratio for strong eye blink detection based on facial landmarks
Source: PeerJ Comput Sci. 2022 Apr 18;8:e943. doi: 10.7717/peerj-cs.943 (PMC9044337; doi:10.7717/peerj-cs.943)
Supplement: Supplemental Information 8 [file peerj-cs-08-943-s008.vsdx › visio/pages/page2.xml]

<?xml version='1.0' encoding='utf-8' ?>
<PageContents xmlns='http://schemas.microsoft.com/office/visio/2012/main' xmlns:r='http://schemas.openxmlformats.org/officeDocument/2006/relationships' xml:space='preserve'><Shapes><Shape ID='42' NameU='Start/End.10' Name='Start/End.10' Type='Shape' Master='10'><Cell N='PinX' V='10'/><Cell N='PinY' V='10.4375'/><Cell N='Width' V='1'/><Cell N='Height' V='0.375'/><Cell N='LocPinX' V='0.5' F='Inh'/><Cell N='LocPinY' V='0.1875' F='Inh'/><Cell N='LayerMember' V='1'/><Cell N='LineWeight' V='0.01041666666666667' U='PT' F='Inh'/><Cell N='FillBkgnd' V='#000000' F='Inh'/><Cell N='ShapeShdwShow' V='2'/><Cell N='TxtPinX' V='0.5' F='Inh'/><Cell N='TxtPinY' V='0.1875' F='Inh'/><Cell N='TxtWidth' V='1' F='Inh'/><Cell N='TxtHeight' V='0.375' F='Inh'/><Cell N='TxtLocPinX' V='0.5' F='Inh'/><Cell N='TxtLocPinY' V='0.1875' F='Inh'/><Section N='User'><Row N='visNavOrder'><Cell N='Value' V='1000'/><Cell N='Prompt' V='' F='No Formula'/></Row></Section><Section N='Character'><Row IX='0'><Cell N='Size' V='0.1944444444444444' U='PT'/></Row></Section><Section N='Connection'><Row T='Connection' IX='0'><Cell N='X' V='0.5' F='Inh'/><Cell N='Y' V='0' F='Inh'/></Row><Row T='Connection' IX='1'><Cell N='X' V='0.5' F='Inh'/><Cell N='Y' V='0.375' F='Inh'/></Row><Row T='Connection' IX='2'><Cell N='Y' V='0.1874999999999963' F='Inh'/></Row><Row T='Connection' IX='3'><Cell N='X' V='1' F='Inh'/><Cell N='Y' V='0.1874999999999963' F='Inh'/></Row></Section><Section N='Geometry' IX='0'><Row T='MoveTo' IX='1'><Cell N='X' V='0.1875' F='Inh'/></Row><Row T='LineTo' IX='2'><Cell N='X' V='0.8125' F='Inh'/></Row><Row T='EllipticalArcTo' IX='3'><Cell N='X' V='0.8125' F='Inh'/><Cell N='Y' V='0.375' F='Inh'/><Cell N='A' V='1' U='DL' F='Inh'/><Cell N='B' V='0.1874999999999963' U='DL' F='Inh'/></Row><Row T='LineTo' IX='4'><Cell N='X' V='0.1875' F='Inh'/><Cell N='Y' V='0.375' F='Inh'/></Row><Row T='EllipticalArcTo' IX='5'><Cell N='X' V='0.1875' F='Inh'/><Cell N='B' V='0.1874999999999963' U='DL' F='Inh'/></Row></Section><Text><cp IX='0'/>Start
</Text></Shape><Shape ID='43' NameU='Data.11' Name='Data.11' Type='Shape' Master='11'><Cell N='PinX' V='10'/><Cell N='PinY' V='9.75'/><Cell N='Width' V='1.618750000000006'/><Cell N='Height' V='0.375'/><Cell N='LocPinX' V='0.8093750000000031' F='Inh'/><Cell N='LocPinY' V='0.1875' F='Inh'/><Cell N='LayerMember' V='1'/><Cell N='LineWeight' V='0.01041666666666667' U='PT' F='Inh'/><Cell N='FillBkgnd' V='#000000' F='Inh'/><Cell N='ShapeShdwShow' V='2'/><Cell N='TxtPinX' V='0.8093750000000031' F='Inh'/><Cell N='TxtPinY' V='0.1875' F='Inh'/><Cell N='TxtWidth' V='1.079166666666676' F='Inh'/><Cell N='TxtHeight' V='0.375' F='Inh'/><Cell N='TxtLocPinX' V='0.5395833333333381' F='Inh'/><Cell N='TxtLocPinY' V='0.1875' F='Inh'/><Section N='Actions'><Row N='SetDefaultSize'><Cell N='Invisible' V='0' F='Inh'/></Row><Row N='ResizeWithText'><Cell N='Invisible' V='0' F='Inh'/></Row></Section><Section N='User'><Row N='visNavOrder'><Cell N='Value' V='2000'/><Cell N='Prompt' V='' F='No Formula'/></Row></Section><Section N='Character'><Row IX='0'><Cell N='Size' V='0.1944444444444444' U='PT'/></Row></Section><Section N='Connection'><Row T='Connection' IX='0'><Cell N='Y' V='0.1875' F='Inh'/></Row><Row T='Connection' IX='1'><Cell N='X' V='1.618750000000006' F='Inh'/><Cell N='Y' V='0.1875' F='Inh'/></Row><Row T='Connection' IX='2'><Cell N='X' V='0.8093750000000031' F='Inh'/></Row><Row T='Connection' IX='3'><Cell N='X' V='0.8093750000000031' F='Inh'/><Cell N='Y' V='0.375' F='Inh'/></Row></Section><Section N='Scratch'><Row IX='0'><Cell N='X' V='0.09375' F='Inh'/></Row></Section><Section N='Geometry' IX='0'><Row T='MoveTo' IX='1'><Cell N='X' V='-0.09375' F='Inh'/></Row><Row T='LineTo' IX='2'><Cell N='X' V='1.525000000000006' F='Inh'/></Row><Row T='LineTo' IX='3'><Cell N='X' V='1.712500000000006' F='Inh'/><Cell N='Y' V='0.375' F='Inh'/></Row><Row T='LineTo' IX='4'><Cell N='X' V='0.09375' F='Inh'/><Cell N='Y' V='0.375' F='Inh'/></Row><Row T='LineTo' IX='5'><Cell N='X' V='-0.09375' F='Inh'/></Row></Section><Text><cp IX='0'/>Video Frame
</Text></Shape><Shape ID='44' NameU='Decision.12' Name='Decision.12' Type='Shape' Master='12'><Cell N='PinX' V='10'/><Cell N='PinY' V='8.062500000000012'/><Cell N='Width' V='1.618750000000006'/><Cell N='Height' V='0.75'/><Cell N='LocPinX' V='0.8093750000000032' F='Inh'/><Cell N='LocPinY' V='0.375' F='Inh'/><Cell N='LayerMember' V='1'/><Cell N='LineWeight' V='0.01041666666666667' U='PT' F='Inh'/><Cell N='FillBkgnd' V='#000000' F='Inh'/><Cell N='ShapeShdwShow' V='2'/><Cell N='TxtPinX' V='0.8093750000000032' F='Inh'/><Cell N='TxtPinY' V='0.375' F='Inh'/><Cell N='TxtWidth' V='1.348958333333333' F='Inh'/><Cell N='TxtHeight' V='0.5625' F='Inh'/><Cell N='TxtLocPinX' V='0.6744791666666666' F='Inh'/><Cell N='TxtLocPinY' V='0.28125' F='Inh'/><Section N='Actions'><Row N='SetDefaultSize'><Cell N='Invisible' V='0' F='Inh'/></Row></Section><Section N='User'><Row N='visNavOrder'><Cell N='Value' V='3000'/><Cell N='Prompt' V='' F='No Formula'/></Row></Section><Section N='Character'><Row IX='0'><Cell N='Size' V='0.1944444444444444' U='PT'/></Row></Section><Section N='Connection'><Row T='Connection' IX='0'><Cell N='Y' V='0.375' F='Inh'/></Row><Row T='Connection' IX='1'><Cell N='X' V='1.618750000000006' F='Inh'/><Cell N='Y' V='0.375' F='Inh'/></Row><Row T='Connection' IX='2'><Cell N='X' V='0.8093750000000032' F='Inh'/><Cell N='Y' V='0.75' F='Inh'/></Row><Row T='Connection' IX='3'><Cell N='X' V='0.8093750000000032' F='Inh'/></Row></Section><Section N='Geometry' IX='0'><Row T='MoveTo' IX='1'><Cell N='X' V='0' F='Inh'/><Cell N='Y' V='0.375' F='Inh'/></Row><Row T='LineTo' IX='2'><Cell N='X' V='0.8093750000000032' F='Inh'/><Cell N='Y' V='0.75' F='Inh'/></Row><Row T='LineTo' IX='3'><Cell N='X' V='1.618750000000006' F='Inh'/><Cell N='Y' V='0.375' F='Inh'/></Row><Row T='LineTo' IX='4'><Cell N='X' V='0.8093750000000032' F='Inh'/><Cell N='Y' V='0' F='Inh'/></Row><Row T='LineTo' IX='5'><Cell N='X' V='0' F='Inh'/><Cell N='Y' V='0.375' F='Inh'/></Row></Section><Text><cp IX='0'/>Face Detected?
</Text></Shape><Shape ID='45' NameU='Process.13' Name='Process.13' Type='Shape' Master='13'><Cell N='PinX' V='10'/><Cell N='PinY' V='2.1875'/><Cell N='Width' V='1.618750000000006'/><Cell N='Height' V='0.375'/><Cell N='LocPinX' V='0.8093750000000031' F='Inh'/><Cell N='LocPinY' V='0.1875' F='Inh'/><Cell N='LayerMember' V='1'/><Cell N='LineWeight' V='0.01041666666666667' U='PT' F='Inh'/><Cell N='FillBkgnd' V='#000000' F='Inh'/><Cell N='ShapeShdwShow' V='2'/><Cell N='TxtPinX' V='0.8093750000000031' F='Inh'/><Cell N='TxtPinY' V='0.1875' F='Inh'/><Cell N='TxtWidth' V='1.618750000000006' F='Inh'/><Cell N='TxtHeight' V='0.375' F='Inh'/><Cell N='TxtLocPinX' V='0.8093750000000031' F='Inh'/><Cell N='TxtLocPinY' V='0.1875' F='Inh'/><Section N='Actions'><Row N='SetDefaultSize'><Cell N='Invisible' V='0' F='Inh'/></Row><Row N='ResizeWithText'><Cell N='Invisible' V='0' F='Inh'/></Row></Section><Section N='User'><Row N='visNavOrder'><Cell N='Value' V='4000'/><Cell N='Prompt' V='' F='No Formula'/></Row></Section><Section N='Character'><Row IX='0'><Cell N='Size' V='0.1944444444444444' U='PT'/></Row></Section><Section N='Connection'><Row T='Connection' IX='0'><Cell N='Y' V='0.1875' F='Inh'/></Row><Row T='Connection' IX='1'><Cell N='X' V='1.618750000000006' F='Inh'/><Cell N='Y' V='0.1875' F='Inh'/></Row><Row T='Connection' IX='2'><Cell N='X' V='0.8093750000000031' F='Inh'/></Row><Row T='Connection' IX='3'><Cell N='X' V='0.8093750000000031' F='Inh'/><Cell N='Y' V='0.375' F='Inh'/></Row></Section><Section N='Geometry' IX='0'><Row T='MoveTo' IX='1'><Cell N='X' V='0' F='Inh'/><Cell N='Y' V='0' F='Inh'/></Row><Row T='LineTo' IX='2'><Cell N='X' V='1.618750000000006' F='Inh'/><Cell N='Y' V='0' F='Inh'/></Row><Row T='LineTo' IX='3'><Cell N='X' V='1.618750000000006' F='Inh'/><Cell N='Y' V='0.375' F='Inh'/></Row><Row T='LineTo' IX='4'><Cell N='X' V='0' F='Inh'/><Cell N='Y' V='0.375' F='Inh'/></Row><Row T='LineTo' IX='5'><Cell N='X' V='0' F='Inh'/><Cell N='Y' V='0' F='Inh'/></Row></Section><Text><cp IX='0'/>Calculate Blink
</Text></Shape><Shape ID='46' NameU='Process.46' Name='Process.46' Type='Shape' Master='13'><Cell N='PinX' V='10'/><Cell N='PinY' V='7.0625'/><Cell N='Width' V='2.23125'/><Cell N='Height' V='0.375'/><Cell N='LocPinX' V='1.115625' F='Inh'/><Cell N='LocPinY' V='0.1875' F='Inh'/><Cell N='LayerMember' V='1'/><Cell N='LineWeight' V='0.01041666666666667' U='PT' F='Inh'/><Cell N='FillBkgnd' V='#000000' F='Inh'/><Cell N='ShapeShdwShow' V='2'/><Cell N='TxtPinX' V='1.115625' F='Inh'/><Cell N='TxtPinY' V='0.1875' F='Inh'/><Cell N='TxtWidth' V='2.23125' F='Inh'/><Cell N='TxtHeight' V='0.375' F='Inh'/><Cell N='TxtLocPinX' V='1.115625' F='Inh'/><Cell N='TxtLocPinY' V='0.1875' F='Inh'/><Section N='Actions'><Row N='SetDefaultSize'><Cell N='Invisible' V='0' F='Inh'/></Row><Row N='ResizeWithText'><Cell N='Invisible' V='0' F='Inh'/></Row></Section><Section N='User'><Row N='visNavOrder'><Cell N='Value' V='3750'/><Cell N='Prompt' V='' F='No Formula'/></Row></Section><Section N='Character'><Row IX='0'><Cell N='Size' V='0.1944444444444444' U='PT'/></Row></Section><Section N='Connection'><Row T='Connection' IX='0'><Cell N='Y' V='0.1875' F='Inh'/></Row><Row T='Connection' IX='1'><Cell N='X' V='2.23125' F='Inh'/><Cell N='Y' V='0.1875' F='Inh'/></Row><Row T='Connection' IX='2'><Cell N='X' V='1.115625' F='Inh'/></Row><Row T='Connection' IX='3'><Cell N='X' V='1.115625' F='Inh'/><Cell N='Y' V='0.375' F='Inh'/></Row></Section><Section N='Geometry' IX='0'><Row T='MoveTo' IX='1'><Cell N='X' V='0' F='Inh'/><Cell N='Y' V='0' F='Inh'/></Row><Row T='LineTo' IX='2'><Cell N='X' V='2.23125' F='Inh'/><Cell N='Y' V='0' F='Inh'/></Row><Row T='LineTo' IX='3'><Cell N='X' V='2.23125' F='Inh'/><Cell N='Y' V='0.375' F='Inh'/></Row><Row T='LineTo' IX='4'><Cell N='X' V='0' F='Inh'/><Cell N='Y' V='0.375' F='Inh'/></Row><Row T='LineTo' IX='5'><Cell N='X' V='0' F='Inh'/><Cell N='Y' V='0' F='Inh'/></Row></Section><Text><cp IX='0'/>Detect Eyes in Face Images
</Text></Shape><Shape ID='47' NameU='Process.47' Name='Process.47' Type='Shape' Master='13'><Cell N='PinX' V='10'/><Cell N='PinY' V='5.1875'/><Cell N='Width' V='1.309375'/><Cell N='Height' V='0.375'/><Cell N='LocPinX' V='0.6546875000000014' F='Inh'/><Cell N='LocPinY' V='0.1875' F='Inh'/><Cell N='LayerMember' V='1'/><Cell N='LineWeight' V='0.01041666666666667' U='PT' F='Inh'/><Cell N='FillBkgnd' V='#000000' F='Inh'/><Cell N='ShapeShdwShow' V='2'/><Cell N='TxtPinX' V='0.6546875000000014' F='Inh'/><Cell N='TxtPinY' V='0.1875' F='Inh'/><Cell N='TxtWidth' V='1.309375' F='Inh'/><Cell N='TxtHeight' V='0.375' F='Inh'/><Cell N='TxtLocPinX' V='0.6546875000000014' F='Inh'/><Cell N='TxtLocPinY' V='0.1875' F='Inh'/><Section N='Actions'><Row N='SetDefaultSize'><Cell N='Invisible' V='0' F='Inh'/></Row><Row N='ResizeWithText'><Cell N='Invisible' V='0' F='Inh'/></Row></Section><Section N='User'><Row N='visNavOrder'><Cell N='Value' V='3937'/><Cell N='Prompt' V='' F='No Formula'/></Row></Section><Section N='Character'><Row IX='0'><Cell N='Size' V='0.1944444444444444' U='PT'/></Row></Section><Section N='Connection'><Row T='Connection' IX='0'><Cell N='Y' V='0.1875' F='Inh'/></Row><Row T='Connection' IX='1'><Cell N='X' V='1.309375' F='Inh'/><Cell N='Y' V='0.1875' F='Inh'/></Row><Row T='Connection' IX='2'><Cell N='X' V='0.6546875000000014' F='Inh'/></Row><Row T='Connection' IX='3'><Cell N='X' V='0.6546875000000014' F='Inh'/><Cell N='Y' V='0.375' F='Inh'/></Row></Section><Section N='Geometry' IX='0'><Row T='MoveTo' IX='1'><Cell N='X' V='0' F='Inh'/><Cell N='Y' V='0' F='Inh'/></Row><Row T='LineTo' IX='2'><Cell N='X' V='1.309375' F='Inh'/><Cell N='Y' V='0' F='Inh'/></Row><Row T='LineTo' IX='3'><Cell N='X' V='1.309375' F='Inh'/><Cell N='Y' V='0.375' F='Inh'/></Row><Row T='LineTo' IX='4'><Cell N='X' V='0' F='Inh'/><Cell N='Y' V='0.375' F='Inh'/></Row><Row T='LineTo' IX='5'><Cell N='X' V='0' F='Inh'/><Cell N='Y' V='0' F='Inh'/></Row></Section><Text><cp IX='0'/>Calculate EAR
</Text></Shape><Shape ID='48' NameU='Start/End.48' Name='Start/End.48' Type='Shape' Master='10'><Cell N='PinX' V='10'/><Cell N='PinY' V='1.625'/><Cell N='Width' V='1'/><Cell N='Height' V='0.375'/><Cell N='LocPinX' V='0.5' F='Inh'/><Cell N='LocPinY' V='0.1875' F='Inh'/><Cell N='LayerMember' V='1'/><Cell N='LineWeight' V='0.01041666666666667' U='PT' F='Inh'/><Cell N='FillBkgnd' V='#000000' F='Inh'/><Cell N='ShapeShdwShow' V='2'/><Cell N='TxtPinX' V='0.5' F='Inh'/><Cell N='TxtPinY' V='0.1875' F='Inh'/><Cell N='TxtWidth' V='1' F='Inh'/><Cell N='TxtHeight' V='0.375' F='Inh'/><Cell N='TxtLocPinX' V='0.5' F='Inh'/><Cell N='TxtLocPinY' V='0.1875' F='Inh'/><Section N='User'><Row N='visNavOrder'><Cell N='Value' V='14000'/><Cell N='Prompt' V='' F='No Formula'/></Row></Section><Section N='Character'><Row IX='0'><Cell N='Size' V='0.1944444444444444' U='PT'/></Row></Section><Section N='Connection'><Row T='Connection' IX='0'><Cell N='X' V='0.5' F='Inh'/><Cell N='Y' V='0' F='Inh'/></Row><Row T='Connection' IX='1'><Cell N='X' V='0.5' F='Inh'/><Cell N='Y' V='0.375' F='Inh'/></Row><Row T='Connection' IX='2'><Cell N='Y' V='0.1874999999999963' F='Inh'/></Row><Row T='Connection' IX='3'><Cell N='X' V='1' F='Inh'/><Cell N='Y' V='0.1874999999999963' F='Inh'/></Row></Section><Section N='Geometry' IX='0'><Row T='MoveTo' IX='1'><Cell N='X' V='0.1875' F='Inh'/></Row><Row T='LineTo' IX='2'><Cell N='X' V='0.8125' F='Inh'/></Row><Row T='EllipticalArcTo' IX='3'><Cell N='X' V='0.8125' F='Inh'/><Cell N='Y' V='0.375' F='Inh'/><Cell N='A' V='1' U='DL' F='Inh'/><Cell N='B' V='0.1874999999999963' U='DL' F='Inh'/></Row><Row T='LineTo' IX='4'><Cell N='X' V='0.1875' F='Inh'/><Cell N='Y' V='0.375' F='Inh'/></Row><Row T='EllipticalArcTo' IX='5'><Cell N='X' V='0.1875' F='Inh'/><Cell N='B' V='0.1874999999999963' U='DL' F='Inh'/></Row></Section><Text><cp IX='0'/>End
</Text></Shape><Shape ID='49' Type='Shape' Master='2'><Cell N='PinX' V='10' F='Inh'/><Cell N='PinY' V='10.09375' F='Inh'/><Cell N='Width' V='0.25' F='GUARD(0.25DL)'/><Cell N='Height' V='-0.3124999999999982' F='GUARD(EndY-BeginY)'/><Cell N='LocPinX' V='0.125' F='Inh'/><Cell N='LocPinY' V='-0.1562499999999991' F='Inh'/><Cell N='BeginX' V='10' F='PAR(PNT(Sheet.42!Connections.X1,Sheet.42!Connections.Y1))'/><Cell N='BeginY' V='10.25' F='PAR(PNT(Sheet.42!Connections.X1,Sheet.42!Connections.Y1))'/><Cell N='EndX' V='10' F='PAR(PNT(Sheet.43!Connections.X4,Sheet.43!Connections.Y4))'/><Cell N='EndY' V='9.9375' F='PAR(PNT(Sheet.43!Connections.X4,Sheet.43!Connections.Y4))'/><Cell N='LayerMember' V='0'/><Cell N='BegTrigger' V='2' F='_XFTRIGGER(Sheet.42!EventXFMod)'/><Cell N='EndTrigger' V='2' F='_XFTRIGGER(Sheet.43!EventXFMod)'/><Cell N='LineWeight' V='0.0033' U='PT' F='Inh'/><Cell N='LineColor' V='#000000' F='Inh'/><Cell N='EndArrow' V='4' F='Inh'/><Cell N='TxtPinX' V='0.125' F='Inh'/><Cell N='TxtPinY' V='-0.15625' F='Inh'/><Cell N='TxtWidth' V='0.9722222222222221' U='PT' F='Inh'/><Cell N='TxtHeight' V='0.3444444444444444' F='Inh'/><Cell N='TxtLocPinX' V='0.4861111111111111' U='PT' F='Inh'/><Cell N='TxtLocPinY' V='0.1722222222222222' F='Inh'/><Cell N='ShapeShdwShow' V='2'/><Section N='Control'><Row N='TextPosition'><Cell N='X' V='0.125'/><Cell N='Y' V='-0.15625'/><Cell N='XDyn' V='0.125' F='Inh'/><Cell N='YDyn' V='-0.15625' F='Inh'/></Row></Section><Section N='User'><Row N='visNavOrder'><Cell N='Value' V='1500'/><Cell N='Prompt' V='' F='No Formula'/></Row></Section><Section N='Character'><Row IX='0'><Cell N='Size' V='0.1944444444444444' U='PT'/></Row></Section><Section N='Geometry' IX='0'><Row T='MoveTo' IX='1'><Cell N='X' V='0.125'/></Row><Row T='LineTo' IX='2'><Cell N='X' V='0.125'/><Cell N='Y' V='-0.3124999999999982'/></Row><Row T='LineTo' IX='3' Del='1'/></Section></Shape><Shape ID='53' Type='Shape' Master='2'><Cell N='PinX' V='10.8609375' F='Inh'/><Cell N='PinY' V='8.562500000000011' F='Inh'/><Cell N='Width' V='0.25' F='GUARD(0.25DL)'/><Cell N='Height' V='0.9999999999999947' F='GUARD(EndY-BeginY)'/><Cell N='LocPinX' V='0.125' F='Inh'/><Cell N='LocPinY' V='0.4999999999999973' F='Inh'/><Cell N='BeginX' V='10.809375' F='PAR(PNT(Sheet.44!Connections.X2,Sheet.44!Connections.Y2))'/><Cell N='BeginY' V='8.062500000000012' F='PAR(PNT(Sheet.44!Connections.X2,Sheet.44!Connections.Y2))'/><Cell N='EndX' V='10.9125' F='PAR(PNT(Sheet.114!Connections.X2,Sheet.114!Connections.Y2))'/><Cell N='EndY' V='9.062500000000007' F='PAR(PNT(Sheet.114!Connections.X2,Sheet.114!Connections.Y2))'/><Cell N='LayerMember' V='0'/><Cell N='BegTrigger' V='2' F='_XFTRIGGER(Sheet.44!EventXFMod)'/><Cell N='EndTrigger' V='2' F='_XFTRIGGER(Sheet.114!EventXFMod)'/><Cell N='LineWeight' V='0.0033' U='PT' F='Inh'/><Cell N='LineColor' V='#000000' F='Inh'/><Cell N='EndArrow' V='4' F='Inh'/><Cell N='TxtPinX' V='0.4265625000000297' F='Inh'/><Cell N='TxtPinY' V='0.9553079044117661' F='Inh'/><Cell N='TxtWidth' V='0.9722222222222221' U='PT' F='Inh'/><Cell N='TxtHeight' V='0.3444924099392361' F='Inh'/><Cell N='TxtLocPinX' V='0.4861111111111111' U='PT' F='Inh'/><Cell N='TxtLocPinY' V='0.1722462049696181' F='Inh'/><Cell N='ShapeShdwShow' V='2'/><Section N='Control'><Row N='TextPosition'><Cell N='X' V='0.4265625000000319'/><Cell N='Y' V='0.9553079044117655'/><Cell N='XDyn' V='0.4265625000000297' F='Inh'/><Cell N='YDyn' V='0.9553079044117661' F='Inh'/><Cell N='XCon' V='0' F='Inh'/></Row></Section><Section N='User'><Row N='visNavOrder'><Cell N='Value' V='3500'/><Cell N='Prompt' V='' F='No Formula'/></Row></Section><Section N='Character'><Row IX='0'><Cell N='Size' V='0.1944444444444444' U='PT'/></Row></Section><Section N='Geometry' IX='0'><Row T='MoveTo' IX='1'><Cell N='X' V='0.07343749999999893'/></Row><Row T='LineTo' IX='2'><Cell N='X' V='0.4265625000000028'/><Cell N='Y' V='0'/></Row><Row T='LineTo' IX='3'><Cell N='X' V='0.4265625000000028'/><Cell N='Y' V='0.9999999999999947'/></Row><Row T='LineTo' IX='4'><Cell N='X' V='0.1765625000000028'/><Cell N='Y' V='0.9999999999999947'/></Row></Section><Text><cp IX='0'/>No
</Text></Shape><Shape ID='54' Type='Shape' Master='2'><Cell N='PinX' V='10' F='Inh'/><Cell N='PinY' V='7.468750000000006' F='Inh'/><Cell N='Width' V='0.25' F='GUARD(0.25DL)'/><Cell N='Height' V='-0.4375000000000124' F='GUARD(EndY-BeginY)'/><Cell N='LocPinX' V='0.125' F='Inh'/><Cell N='LocPinY' V='-0.2187500000000062' F='Inh'/><Cell N='BeginX' V='10' F='PAR(PNT(Sheet.44!Connections.X4,Sheet.44!Connections.Y4))'/><Cell N='BeginY' V='7.687500000000012' F='PAR(PNT(Sheet.44!Connections.X4,Sheet.44!Connections.Y4))'/><Cell N='EndX' V='10' F='PAR(PNT(Sheet.46!Connections.X4,Sheet.46!Connections.Y4))'/><Cell N='EndY' V='7.25' F='PAR(PNT(Sheet.46!Connections.X4,Sheet.46!Connections.Y4))'/><Cell N='LayerMember' V='0'/><Cell N='BegTrigger' V='2' F='_XFTRIGGER(Sheet.44!EventXFMod)'/><Cell N='EndTrigger' V='2' F='_XFTRIGGER(Sheet.46!EventXFMod)'/><Cell N='LineWeight' V='0.0033' U='PT' F='Inh'/><Cell N='LineColor' V='#000000' F='Inh'/><Cell N='EndArrow' V='4' F='Inh'/><Cell N='TxtPinX' V='0.137500000000006' F='Inh'/><Cell N='TxtPinY' V='-0.2417763157894737' F='Inh'/><Cell N='TxtWidth' V='0.9722222222222221' U='PT' F='Inh'/><Cell N='TxtHeight' V='0.3444924099392361' F='Inh'/><Cell N='TxtLocPinX' V='0.4861111111111111' U='PT' F='Inh'/><Cell N='TxtLocPinY' V='0.1722462049696181' F='Inh'/><Cell N='ShapeShdwShow' V='2'/><Section N='Control'><Row N='TextPosition'><Cell N='X' V='0.137500000000006'/><Cell N='Y' V='-0.2417763157894737'/><Cell N='XDyn' V='0.137500000000006' F='Inh'/><Cell N='YDyn' V='-0.2417763157894737' F='Inh'/><Cell N='XCon' V='0' F='Inh'/></Row></Section><Section N='User'><Row N='visNavOrder'><Cell N='Value' V='3984'/><Cell N='Prompt' V='' F='No Formula'/></Row></Section><Section N='Character'><Row IX='0'><Cell N='Size' V='0.1944444444444444' U='PT'/></Row></Section><Section N='Geometry' IX='0'><Row T='MoveTo' IX='1'><Cell N='X' V='0.125'/></Row><Row T='LineTo' IX='2'><Cell N='X' V='0.125'/><Cell N='Y' V='-0.4375000000000124'/></Row><Row T='LineTo' IX='3' Del='1'/></Section><Text><cp IX='0'/>Yes
</Text></Shape><Shape ID='114' Type='Shape' Master='13'><Cell N='PinX' V='10'/><Cell N='PinY' V='9.062500000000005'/><Cell N='Width' V='1.825000000000008'/><Cell N='Height' V='0.6249999999999982'/><Cell N='LocPinX' V='0.9125000000000041' F='Inh'/><Cell N='LocPinY' V='0.3124999999999991' F='Inh'/><Cell N='LayerMember' V='1'/><Cell N='TxtPinX' V='0.9125000000000041' F='Inh'/><Cell N='TxtPinY' V='0.3124999999999991' F='Inh'/><Cell N='TxtWidth' V='1.825000000000008' F='Inh'/><Cell N='TxtHeight' V='0.6249999999999982' F='Inh'/><Cell N='TxtLocPinX' V='0.9125000000000041' F='Inh'/><Cell N='TxtLocPinY' V='0.3124999999999991' F='Inh'/><Cell N='LineWeight' V='0.01041666666666667' U='PT' F='Inh'/><Cell N='FillBkgnd' V='#000000' F='Inh'/><Section N='Actions'><Row N='SetDefaultSize'><Cell N='Invisible' V='0' F='Inh'/></Row><Row N='ResizeWithText'><Cell N='Invisible' V='0' F='Inh'/></Row></Section><Section N='User'><Row N='visNavOrder'><Cell N='Value' V='15000'/><Cell N='Prompt' V='' F='No Formula'/></Row></Section><Section N='Character'><Row IX='0'><Cell N='Size' V='0.1944444444444444' U='PT'/></Row></Section><Section N='Connection'><Row T='Connection' IX='0'><Cell N='Y' V='0.3124999999999991' F='Inh'/></Row><Row T='Connection' IX='1'><Cell N='X' V='1.825000000000008' F='Inh'/><Cell N='Y' V='0.3124999999999991' F='Inh'/></Row><Row T='Connection' IX='2'><Cell N='X' V='0.9125000000000041' F='Inh'/></Row><Row T='Connection' IX='3'><Cell N='X' V='0.9125000000000041' F='Inh'/><Cell N='Y' V='0.6249999999999982' F='Inh'/></Row></Section><Section N='Geometry' IX='0'><Row T='MoveTo' IX='1'><Cell N='X' V='0' F='Inh'/><Cell N='Y' V='0' F='Inh'/></Row><Row T='LineTo' IX='2'><Cell N='X' V='1.825000000000008' F='Inh'/><Cell N='Y' V='0' F='Inh'/></Row><Row T='LineTo' IX='3'><Cell N='X' V='1.825000000000008' F='Inh'/><Cell N='Y' V='0.6249999999999982' F='Inh'/></Row><Row T='LineTo' IX='4'><Cell N='X' V='0' F='Inh'/><Cell N='Y' V='0.6249999999999982' F='Inh'/></Row><Row T='LineTo' IX='5'><Cell N='X' V='0' F='Inh'/><Cell N='Y' V='0' F='Inh'/></Row></Section><Text><cp IX='0'/>Face Detection using Facial Landmark
</Text></Shape><Shape ID='115' NameU='Dynamic connector' Name='Dynamic connector' Type='Shape' Master='2'><Cell N='PinX' V='10' F='Inh'/><Cell N='PinY' V='9.46875' U='IN' F='Inh'/><Cell N='Width' V='0.25' F='GUARD(0.25DL)'/><Cell N='Height' V='-0.25' F='GUARD(-0.25DL)'/><Cell N='LocPinX' V='0.125' F='Inh'/><Cell N='LocPinY' V='-0.125' F='Inh'/><Cell N='BeginX' V='10' F='PAR(PNT(Sheet.43!Connections.X3,Sheet.43!Connections.Y3))'/><Cell N='BeginY' V='9.5625' U='IN' F='PAR(PNT(Sheet.43!Connections.X3,Sheet.43!Connections.Y3))'/><Cell N='EndX' V='10' F='PAR(PNT(Sheet.114!Connections.X4,Sheet.114!Connections.Y4))'/><Cell N='EndY' V='9.375000000000005' F='PAR(PNT(Sheet.114!Connections.X4,Sheet.114!Connections.Y4))'/><Cell N='LayerMember' V='0'/><Cell N='BegTrigger' V='2' F='_XFTRIGGER(Sheet.43!EventXFMod)'/><Cell N='EndTrigger' V='2' F='_XFTRIGGER(Sheet.114!EventXFMod)'/><Cell N='LineWeight' V='0.0033' U='PT' F='Inh'/><Cell N='LineColor' V='#000000' F='Inh'/><Cell N='EndArrow' V='4' F='Inh'/><Cell N='TxtPinX' V='0.125' F='Inh'/><Cell N='TxtPinY' V='-0.125' F='Inh'/><Section N='Control'><Row N='TextPosition'><Cell N='X' V='0.125'/><Cell N='Y' V='-0.125'/><Cell N='XDyn' V='0.125' F='Inh'/><Cell N='YDyn' V='-0.125' F='Inh'/></Row></Section><Section N='User'><Row N='visNavOrder'><Cell N='Value' V='16000'/><Cell N='Prompt' V='' F='No Formula'/></Row></Section><Section N='Geometry' IX='0'><Row T='MoveTo' IX='1'><Cell N='X' V='0.125'/><Cell N='Y' V='-0.03125000000000178'/></Row><Row T='LineTo' IX='2'><Cell N='X' V='0.125'/><Cell N='Y' V='-0.2187499999999965'/></Row><Row T='LineTo' IX='3' Del='1'/></Section></Shape><Shape ID='118' NameU='Dynamic connector.118' Name='Dynamic connector.118' Type='Shape' Master='2'><Cell N='PinX' V='10' F='Inh'/><Cell N='PinY' V='8.593750000000011' F='Inh'/><Cell N='Width' V='0.25' F='GUARD(0.25DL)'/><Cell N='Height' V='-0.3124999999999947' F='GUARD(EndY-BeginY)'/><Cell N='LocPinX' V='0.125' F='Inh'/><Cell N='LocPinY' V='-0.1562499999999973' F='Inh'/><Cell N='BeginX' V='10' F='PAR(PNT(Sheet.114!Connections.X3,Sheet.114!Connections.Y3))'/><Cell N='BeginY' V='8.750000000000007' F='PAR(PNT(Sheet.114!Connections.X3,Sheet.114!Connections.Y3))'/><Cell N='EndX' V='10' F='PAR(PNT(Sheet.44!Connections.X3,Sheet.44!Connections.Y3))'/><Cell N='EndY' V='8.437500000000012' F='PAR(PNT(Sheet.44!Connections.X3,Sheet.44!Connections.Y3))'/><Cell N='LayerMember' V='0'/><Cell N='BegTrigger' V='2' F='_XFTRIGGER(Sheet.114!EventXFMod)'/><Cell N='EndTrigger' V='2' F='_XFTRIGGER(Sheet.44!EventXFMod)'/><Cell N='LineWeight' V='0.0033' U='PT' F='Inh'/><Cell N='LineColor' V='#000000' F='Inh'/><Cell N='EndArrow' V='4' F='Inh'/><Cell N='TxtPinX' V='0.125' F='Inh'/><Cell N='TxtPinY' V='-0.15625' F='Inh'/><Section N='Control'><Row N='TextPosition'><Cell N='X' V='0.125'/><Cell N='Y' V='-0.15625'/><Cell N='XDyn' V='0.125' F='Inh'/><Cell N='YDyn' V='-0.15625' F='Inh'/></Row></Section><Section N='User'><Row N='visNavOrder'><Cell N='Value' V='17000'/><Cell N='Prompt' V='' F='No Formula'/></Row></Section><Section N='Geometry' IX='0'><Row T='MoveTo' IX='1'><Cell N='X' V='0.125'/></Row><Row T='LineTo' IX='2'><Cell N='X' V='0.125'/><Cell N='Y' V='-0.3124999999999947'/></Row><Row T='LineTo' IX='3' Del='1'/></Section></Shape><Shape ID='120' NameU='Decision.120' Name='Decision.120' Type='Shape' Master='12'><Cell N='PinX' V='10'/><Cell N='PinY' V='6.25'/><Cell N='Width' V='1.618750000000006'/><Cell N='Height' V='0.75'/><Cell N='LocPinX' V='0.8093750000000032' F='Inh'/><Cell N='LocPinY' V='0.375' F='Inh'/><Cell N='LayerMember' V='1'/><Cell N='LineWeight' V='0.01041666666666667' U='PT' F='Inh'/><Cell N='FillBkgnd' V='#000000' F='Inh'/><Cell N='ShapeShdwShow' V='2'/><Cell N='TxtPinX' V='0.8093750000000032' F='Inh'/><Cell N='TxtPinY' V='0.375' F='Inh'/><Cell N='TxtWidth' V='1.348958333333333' F='Inh'/><Cell N='TxtHeight' V='0.5625' F='Inh'/><Cell N='TxtLocPinX' V='0.6744791666666666' F='Inh'/><Cell N='TxtLocPinY' V='0.28125' F='Inh'/><Section N='Actions'><Row N='SetDefaultSize'><Cell N='Invisible' V='0' F='Inh'/></Row></Section><Section N='User'><Row N='visNavOrder'><Cell N='Value' V='18000'/><Cell N='Prompt' V='' F='No Formula'/></Row></Section><Section N='Character'><Row IX='0'><Cell N='Size' V='0.1944444444444444' U='PT'/></Row></Section><Section N='Connection'><Row T='Connection' IX='0'><Cell N='Y' V='0.375' F='Inh'/></Row><Row T='Connection' IX='1'><Cell N='X' V='1.618750000000006' F='Inh'/><Cell N='Y' V='0.375' F='Inh'/></Row><Row T='Connection' IX='2'><Cell N='X' V='0.8093750000000032' F='Inh'/><Cell N='Y' V='0.75' F='Inh'/></Row><Row T='Connection' IX='3'><Cell N='X' V='0.8093750000000032' F='Inh'/></Row></Section><Section N='Geometry' IX='0'><Row T='MoveTo' IX='1'><Cell N='X' V='0' F='Inh'/><Cell N='Y' V='0.375' F='Inh'/></Row><Row T='LineTo' IX='2'><Cell N='X' V='0.8093750000000032' F='Inh'/><Cell N='Y' V='0.75' F='Inh'/></Row><Row T='LineTo' IX='3'><Cell N='X' V='1.618750000000006' F='Inh'/><Cell N='Y' V='0.375' F='Inh'/></Row><Row T='LineTo' IX='4'><Cell N='X' V='0.8093750000000032' F='Inh'/><Cell N='Y' V='0' F='Inh'/></Row><Row T='LineTo' IX='5'><Cell N='X' V='0' F='Inh'/><Cell N='Y' V='0.375' F='Inh'/></Row></Section><Text><cp IX='0'/>Eyes Detected?
</Text></Shape><Shape ID='122' NameU='Dynamic connector.122' Name='Dynamic connector.122' Type='Shape' Master='2'><Cell N='PinX' V='10.9625' F='Inh'/><Cell N='PinY' V='6.65625' F='Inh'/><Cell N='Width' V='0.3062499999999968' F='GUARD(EndX-BeginX)'/><Cell N='Height' V='0.8125' F='GUARD(EndY-BeginY)'/><Cell N='LocPinX' V='0.1531249999999984' F='Inh'/><Cell N='LocPinY' V='0.40625' F='Inh'/><Cell N='BeginX' V='10.809375' F='PAR(PNT(Sheet.120!Connections.X2,Sheet.120!Connections.Y2))'/><Cell N='BeginY' V='6.25' F='PAR(PNT(Sheet.120!Connections.X2,Sheet.120!Connections.Y2))'/><Cell N='EndX' V='11.115625' F='PAR(PNT(Sheet.46!Connections.X2,Sheet.46!Connections.Y2))'/><Cell N='EndY' V='7.0625' F='PAR(PNT(Sheet.46!Connections.X2,Sheet.46!Connections.Y2))'/><Cell N='LayerMember' V='0'/><Cell N='BegTrigger' V='2' F='_XFTRIGGER(Sheet.120!EventXFMod)'/><Cell N='EndTrigger' V='2' F='_XFTRIGGER(Sheet.46!EventXFMod)'/><Cell N='LineWeight' V='0.0033' U='PT' F='Inh'/><Cell N='LineColor' V='#000000' F='Inh'/><Cell N='EndArrow' V='4' F='Inh'/><Cell N='TxtPinX' V='0.5562500000000268' F='Inh'/><Cell N='TxtPinY' V='0.7649356617647122' F='Inh'/><Cell N='TxtWidth' V='0.9722222222222221' U='PT' F='Inh'/><Cell N='TxtHeight' V='0.3444924099392361' F='Inh'/><Cell N='TxtLocPinX' V='0.4861111111111111' U='PT' F='Inh'/><Cell N='TxtLocPinY' V='0.1722462049696181' F='Inh'/><Cell N='ShapeShdwShow' V='2'/><Section N='Control'><Row N='TextPosition'><Cell N='X' V='0.5562500000000259'/><Cell N='Y' V='0.7649356617647124'/><Cell N='XDyn' V='0.5562500000000268' F='Inh'/><Cell N='YDyn' V='0.7649356617647122' F='Inh'/><Cell N='XCon' V='0' F='Inh'/></Row></Section><Section N='User'><Row N='visNavOrder'><Cell N='Value' V='20000'/><Cell N='Prompt' V='' F='No Formula'/></Row></Section><Section N='Character'><Row IX='0'><Cell N='Size' V='0.1944444444444444' U='PT'/></Row></Section><Section N='Geometry' IX='0'><Row T='LineTo' IX='2'><Cell N='X' V='0.5562499999999968'/><Cell N='Y' V='0'/></Row><Row T='LineTo' IX='3'><Cell N='X' V='0.5562499999999968'/><Cell N='Y' V='0.8125'/></Row><Row T='LineTo' IX='4'><Cell N='X' V='0.3062499999999968'/><Cell N='Y' V='0.8125'/></Row></Section><Text><cp IX='0'/>No
</Text></Shape><Shape ID='124' NameU='Decision.124' Name='Decision.124' Type='Shape' Master='12'><Cell N='PinX' V='10'/><Cell N='PinY' V='4.5625'/><Cell N='Width' V='1.618750000000006'/><Cell N='Height' V='0.375'/><Cell N='LocPinX' V='0.8093750000000031' F='Inh'/><Cell N='LocPinY' V='0.1875' F='Inh'/><Cell N='LayerMember' V='1'/><Cell N='LineWeight' V='0.01041666666666667' U='PT' F='Inh'/><Cell N='FillBkgnd' V='#000000' F='Inh'/><Cell N='ShapeShdwShow' V='2'/><Cell N='TxtPinX' V='0.8093750000000031' F='Inh'/><Cell N='TxtPinY' V='0.1875' F='Inh'/><Cell N='TxtWidth' V='1.348958333333333' F='Inh'/><Cell N='TxtHeight' V='0.28125' F='Inh'/><Cell N='TxtLocPinX' V='0.6744791666666665' F='Inh'/><Cell N='TxtLocPinY' V='0.140625' F='Inh'/><Section N='Actions'><Row N='SetDefaultSize'><Cell N='Invisible' V='0' F='Inh'/></Row><Row N='ResizeWithText'><Cell N='Invisible' V='0' F='Inh'/></Row></Section><Section N='User'><Row N='visNavOrder'><Cell N='Value' V='22000'/><Cell N='Prompt' V='' F='No Formula'/></Row></Section><Section N='Character'><Row IX='0'><Cell N='Size' V='0.1944444444444444' U='PT'/></Row></Section><Section N='Connection'><Row T='Connection' IX='0'><Cell N='Y' V='0.1875' F='Inh'/></Row><Row T='Connection' IX='1'><Cell N='X' V='1.618750000000006' F='Inh'/><Cell N='Y' V='0.1875' F='Inh'/></Row><Row T='Connection' IX='2'><Cell N='X' V='0.8093750000000031' F='Inh'/><Cell N='Y' V='0.375' F='Inh'/></Row><Row T='Connection' IX='3'><Cell N='X' V='0.8093750000000031' F='Inh'/></Row></Section><Section N='Geometry' IX='0'><Row T='MoveTo' IX='1'><Cell N='X' V='0' F='Inh'/><Cell N='Y' V='0.1875' F='Inh'/></Row><Row T='LineTo' IX='2'><Cell N='X' V='0.8093750000000031' F='Inh'/><Cell N='Y' V='0.375' F='Inh'/></Row><Row T='LineTo' IX='3'><Cell N='X' V='1.618750000000006' F='Inh'/><Cell N='Y' V='0.1875' F='Inh'/></Row><Row T='LineTo' IX='4'><Cell N='X' V='0.8093750000000031' F='Inh'/><Cell N='Y' V='0' F='Inh'/></Row><Row T='LineTo' IX='5'><Cell N='X' V='0' F='Inh'/><Cell N='Y' V='0.1875' F='Inh'/></Row></Section><Text><cp IX='0'/><pp IX='0'/><tp IX='0'/>EAR &lt;=0
</Text></Shape><Shape ID='126' NameU='Dynamic connector.126' Name='Dynamic connector.126' Type='Shape' Master='2'><Cell N='PinX' V='10' F='Inh'/><Cell N='PinY' V='4.875' F='Inh'/><Cell N='Width' V='0.25' F='GUARD(0.25DL)'/><Cell N='Height' V='-0.25' F='GUARD(EndY-BeginY)'/><Cell N='LocPinX' V='0.125' F='Inh'/><Cell N='LocPinY' V='-0.125' F='Inh'/><Cell N='BeginX' V='10' F='_WALKGLUE(BegTrigger,EndTrigger,WalkPreference)'/><Cell N='BeginY' V='5' F='_WALKGLUE(BegTrigger,EndTrigger,WalkPreference)'/><Cell N='EndX' V='10' F='PAR(PNT(Sheet.124!Connections.X3,Sheet.124!Connections.Y3))'/><Cell N='EndY' V='4.75' F='PAR(PNT(Sheet.124!Connections.X3,Sheet.124!Connections.Y3))'/><Cell N='LayerMember' V='0'/><Cell N='BegTrigger' V='2' F='_XFTRIGGER(Sheet.47!EventXFMod)'/><Cell N='EndTrigger' V='2' F='_XFTRIGGER(Sheet.124!EventXFMod)'/><Cell N='LineWeight' V='0.0033' U='PT' F='Inh'/><Cell N='LineColor' V='#000000' F='Inh'/><Cell N='EndArrow' V='4' F='Inh'/><Cell N='ConFixedCode' V='4'/><Cell N='TxtPinX' V='0.125' F='Inh'/><Cell N='TxtPinY' V='-0.125' F='Inh'/><Section N='Control'><Row N='TextPosition'><Cell N='X' V='0.125'/><Cell N='Y' V='-0.125'/><Cell N='XDyn' V='0.125' F='Inh'/><Cell N='YDyn' V='-0.125' F='Inh'/></Row></Section><Section N='User'><Row N='visNavOrder'><Cell N='Value' V='23000'/><Cell N='Prompt' V='' F='No Formula'/></Row></Section><Section N='Geometry' IX='0'><Row T='MoveTo' IX='1'><Cell N='X' V='0.125'/></Row><Row T='LineTo' IX='2'><Cell N='X' V='0.125'/><Cell N='Y' V='-0.25'/></Row><Row T='LineTo' IX='3' Del='1'/></Section></Shape><Shape ID='127' NameU='Dynamic connector.127' Name='Dynamic connector.127' Type='Shape' Master='2'><Cell N='PinX' V='10' F='Inh'/><Cell N='PinY' V='5.625' F='Inh'/><Cell N='Width' V='0.25' F='GUARD(0.25DL)'/><Cell N='Height' V='-0.5' F='GUARD(EndY-BeginY)'/><Cell N='LocPinX' V='0.125' F='Inh'/><Cell N='LocPinY' V='-0.25' F='Inh'/><Cell N='BeginX' V='10' F='PAR(PNT(Sheet.120!Connections.X4,Sheet.120!Connections.Y4))'/><Cell N='BeginY' V='5.875' F='PAR(PNT(Sheet.120!Connections.X4,Sheet.120!Connections.Y4))'/><Cell N='EndX' V='10' F='_WALKGLUE(EndTrigger,BegTrigger,WalkPreference)'/><Cell N='EndY' V='5.375' F='_WALKGLUE(EndTrigger,BegTrigger,WalkPreference)'/><Cell N='LayerMember' V='0'/><Cell N='BegTrigger' V='2' F='_XFTRIGGER(Sheet.120!EventXFMod)'/><Cell N='EndTrigger' V='2' F='_XFTRIGGER(Sheet.47!EventXFMod)'/><Cell N='LineWeight' V='0.0033' U='PT' F='Inh'/><Cell N='LineColor' V='#000000' F='Inh'/><Cell N='EndArrow' V='4' F='Inh'/><Cell N='TxtPinX' V='0.137500000000006' F='Inh'/><Cell N='TxtPinY' V='-0.2763157894736842' F='Inh'/><Cell N='TxtWidth' V='0.9722222222222221' U='PT' F='Inh'/><Cell N='TxtHeight' V='0.3444924099392361' F='Inh'/><Cell N='TxtLocPinX' V='0.4861111111111111' U='PT' F='Inh'/><Cell N='TxtLocPinY' V='0.1722462049696181' F='Inh'/><Cell N='ShapeShdwShow' V='2'/><Cell N='ConFixedCode' V='5'/><Section N='Control'><Row N='TextPosition'><Cell N='X' V='0.137500000000006'/><Cell N='Y' V='-0.2763157894736842'/><Cell N='XDyn' V='0.137500000000006' F='Inh'/><Cell N='YDyn' V='-0.2763157894736842' F='Inh'/><Cell N='XCon' V='0' F='Inh'/></Row></Section><Section N='User'><Row N='visNavOrder'><Cell N='Value' V='24000'/><Cell N='Prompt' V='' F='No Formula'/></Row></Section><Section N='Character'><Row IX='0'><Cell N='Size' V='0.1944444444444444' U='PT'/></Row></Section><Section N='Geometry' IX='0'><Row T='MoveTo' IX='1'><Cell N='X' V='0.125'/></Row><Row T='LineTo' IX='2'><Cell N='X' V='0.125'/><Cell N='Y' V='-0.5'/></Row><Row T='LineTo' IX='3' Del='1'/></Section><Text><cp IX='0'/>Yes
</Text></Shape><Shape ID='128' NameU='Dynamic connector.128' Name='Dynamic connector.128' Type='Shape' Master='2'><Cell N='PinX' V='10' F='Inh'/><Cell N='PinY' V='6.75' F='Inh'/><Cell N='Width' V='0.25' F='GUARD(0.25DL)'/><Cell N='Height' V='-0.25' F='GUARD(EndY-BeginY)'/><Cell N='LocPinX' V='0.125' F='Inh'/><Cell N='LocPinY' V='-0.125' F='Inh'/><Cell N='BeginX' V='10' F='PAR(PNT(Sheet.46!Connections.X3,Sheet.46!Connections.Y3))'/><Cell N='BeginY' V='6.875' F='PAR(PNT(Sheet.46!Connections.X3,Sheet.46!Connections.Y3))'/><Cell N='EndX' V='10' F='PAR(PNT(Sheet.120!Connections.X3,Sheet.120!Connections.Y3))'/><Cell N='EndY' V='6.625' F='PAR(PNT(Sheet.120!Connections.X3,Sheet.120!Connections.Y3))'/><Cell N='LayerMember' V='0'/><Cell N='BegTrigger' V='2' F='_XFTRIGGER(Sheet.46!EventXFMod)'/><Cell N='EndTrigger' V='2' F='_XFTRIGGER(Sheet.120!EventXFMod)'/><Cell N='LineWeight' V='0.0033' U='PT' F='Inh'/><Cell N='LineColor' V='#000000' F='Inh'/><Cell N='EndArrow' V='4' F='Inh'/><Cell N='TxtPinX' V='0.125' F='Inh'/><Cell N='TxtPinY' V='-0.125' F='Inh'/><Section N='Control'><Row N='TextPosition'><Cell N='X' V='0.125'/><Cell N='Y' V='-0.125'/><Cell N='XDyn' V='0.125' F='Inh'/><Cell N='YDyn' V='-0.125' F='Inh'/></Row></Section><Section N='User'><Row N='visNavOrder'><Cell N='Value' V='25000'/><Cell N='Prompt' V='' F='No Formula'/></Row></Section><Section N='Geometry' IX='0'><Row T='MoveTo' IX='1'><Cell N='X' V='0.125'/></Row><Row T='LineTo' IX='2'><Cell N='X' V='0.125'/><Cell N='Y' V='-0.25'/></Row><Row T='LineTo' IX='3' Del='1'/></Section></Shape><Shape ID='131' NameU='Decision.131' Name='Decision.131' Type='Shape' Master='12'><Cell N='PinX' V='10'/><Cell N='PinY' V='3.375'/><Cell N='Width' V='2.7171875'/><Cell N='Height' V='1.25'/><Cell N='LocPinX' V='1.35859375' F='Inh'/><Cell N='LocPinY' V='0.625' F='Inh'/><Cell N='LayerMember' V='1'/><Cell N='LineWeight' V='0.01041666666666667' U='PT' F='Inh'/><Cell N='FillBkgnd' V='#000000' F='Inh'/><Cell N='ShapeShdwShow' V='2'/><Cell N='TxtPinX' V='1.35859375' F='Inh'/><Cell N='TxtPinY' V='0.625' F='Inh'/><Cell N='TxtWidth' V='2.264322916666659' F='Inh'/><Cell N='TxtHeight' V='0.9375' F='Inh'/><Cell N='TxtLocPinX' V='1.13216145833333' F='Inh'/><Cell N='TxtLocPinY' V='0.46875' F='Inh'/><Section N='Actions'><Row N='SetDefaultSize'><Cell N='Invisible' V='0' F='Inh'/></Row><Row N='ResizeWithText'><Cell N='Invisible' V='0' F='Inh'/></Row></Section><Section N='User'><Row N='visNavOrder'><Cell N='Value' V='27000'/><Cell N='Prompt' V='' F='No Formula'/></Row></Section><Section N='Character'><Row IX='0'><Cell N='Size' V='0.1666666666666667' U='PT'/></Row></Section><Section N='Connection'><Row T='Connection' IX='0'><Cell N='Y' V='0.625' F='Inh'/></Row><Row T='Connection' IX='1'><Cell N='X' V='2.7171875' F='Inh'/><Cell N='Y' V='0.625' F='Inh'/></Row><Row T='Connection' IX='2'><Cell N='X' V='1.35859375' F='Inh'/><Cell N='Y' V='1.25' F='Inh'/></Row><Row T='Connection' IX='3'><Cell N='X' V='1.35859375' F='Inh'/></Row></Section><Section N='Geometry' IX='0'><Row T='MoveTo' IX='1'><Cell N='X' V='0' F='Inh'/><Cell N='Y' V='0.625' F='Inh'/></Row><Row T='LineTo' IX='2'><Cell N='X' V='1.35859375' F='Inh'/><Cell N='Y' V='1.25' F='Inh'/></Row><Row T='LineTo' IX='3'><Cell N='X' V='2.7171875' F='Inh'/><Cell N='Y' V='0.625' F='Inh'/></Row><Row T='LineTo' IX='4'><Cell N='X' V='1.35859375' F='Inh'/><Cell N='Y' V='0' F='Inh'/></Row><Row T='LineTo' IX='5'><Cell N='X' V='0' F='Inh'/><Cell N='Y' V='0.625' F='Inh'/></Row></Section><Text><cp IX='0'/><pp IX='0'/><tp IX='0'/>EAR &lt;=EAR_THRESHOLD for Eye Closed Time &gt;=3s
</Text></Shape><Shape ID='133' NameU='Dynamic connector.133' Name='Dynamic connector.133' Type='Shape' Master='2'><Cell N='PinX' V='10' F='Inh'/><Cell N='PinY' V='4.1875' F='Inh'/><Cell N='Width' V='0.25' F='GUARD(0.25DL)'/><Cell N='Height' V='-0.375' F='GUARD(EndY-BeginY)'/><Cell N='LocPinX' V='0.125' F='Inh'/><Cell N='LocPinY' V='-0.1875' F='Inh'/><Cell N='BeginX' V='10' F='_WALKGLUE(BegTrigger,EndTrigger,WalkPreference)'/><Cell N='BeginY' V='4.375' F='_WALKGLUE(BegTrigger,EndTrigger,WalkPreference)'/><Cell N='EndX' V='10' F='_WALKGLUE(EndTrigger,BegTrigger,WalkPreference)'/><Cell N='EndY' V='4' F='_WALKGLUE(EndTrigger,BegTrigger,WalkPreference)'/><Cell N='LayerMember' V='0'/><Cell N='BegTrigger' V='2' F='_XFTRIGGER(Sheet.124!EventXFMod)'/><Cell N='EndTrigger' V='2' F='_XFTRIGGER(Sheet.131!EventXFMod)'/><Cell N='LineWeight' V='0.0033' U='PT' F='Inh'/><Cell N='LineColor' V='#000000' F='Inh'/><Cell N='EndArrow' V='4' F='Inh'/><Cell N='TxtPinX' V='0.137500000000006' F='Inh'/><Cell N='TxtPinY' V='-0.2072368421052632' F='Inh'/><Cell N='TxtWidth' V='0.9722222222222221' U='PT' F='Inh'/><Cell N='TxtHeight' V='0.3444924099392361' F='Inh'/><Cell N='TxtLocPinX' V='0.4861111111111111' U='PT' F='Inh'/><Cell N='TxtLocPinY' V='0.1722462049696181' F='Inh'/><Cell N='ShapeShdwShow' V='2'/><Cell N='ConFixedCode' V='6'/><Section N='Control'><Row N='TextPosition'><Cell N='X' V='0.137500000000006'/><Cell N='Y' V='-0.2072368421052632'/><Cell N='XDyn' V='0.137500000000006' F='Inh'/><Cell N='YDyn' V='-0.2072368421052632' F='Inh'/><Cell N='XCon' V='0' F='Inh'/></Row></Section><Section N='User'><Row N='visNavOrder'><Cell N='Value' V='28000'/><Cell N='Prompt' V='' F='No Formula'/></Row></Section><Section N='Character'><Row IX='0'><Cell N='Size' V='0.1944444444444444' U='PT'/></Row></Section><Section N='Geometry' IX='0'><Row T='MoveTo' IX='1'><Cell N='X' V='0.125'/></Row><Row T='LineTo' IX='2'><Cell N='X' V='0.125'/><Cell N='Y' V='-0.375'/></Row><Row T='LineTo' IX='3' Del='1'/></Section><Text><cp IX='0'/>Yes
</Text></Shape><Shape ID='135' NameU='Dynamic connector.135' Name='Dynamic connector.135' Type='Shape' Master='2'><Cell N='PinX' V='9.977083333333328' F='Inh'/><Cell N='PinY' V='2.572916666666667' F='Inh'/><Cell N='Width' V='0.25' F='GUARD(0.25DL)'/><Cell N='Height' V='-0.375' F='GUARD(EndY-BeginY)'/><Cell N='LocPinX' V='0.125' F='Inh'/><Cell N='LocPinY' V='-0.1875' F='Inh'/><Cell N='BeginX' V='9.977083333333328'/><Cell N='BeginY' V='2.760416666666667'/><Cell N='EndX' V='9.977083333333328'/><Cell N='EndY' V='2.385416666666667'/><Cell N='LayerMember' V='0'/><Cell N='BegTrigger' V='1' F='_XFTRIGGER(Sheet.135!EventXFMod)'/><Cell N='EndTrigger' V='1' F='_XFTRIGGER(Sheet.135!EventXFMod)'/><Cell N='LineWeight' V='0.0033' U='PT' F='Inh'/><Cell N='LineColor' V='#000000' F='Inh'/><Cell N='EndArrow' V='4' F='Inh'/><Cell N='TxtPinX' V='0.137500000000006' F='Inh'/><Cell N='TxtPinY' V='-0.2072368421052632' F='Inh'/><Cell N='TxtWidth' V='0.9722222222222221' U='PT' F='Inh'/><Cell N='TxtHeight' V='0.3444924099392361' F='Inh'/><Cell N='TxtLocPinX' V='0.4861111111111111' U='PT' F='Inh'/><Cell N='TxtLocPinY' V='0.1722462049696181' F='Inh'/><Cell N='ShapeShdwShow' V='2'/><Section N='Control'><Row N='TextPosition'><Cell N='X' V='0.137500000000006'/><Cell N='Y' V='-0.2072368421052632'/><Cell N='XDyn' V='0.137500000000006' F='Inh'/><Cell N='YDyn' V='-0.2072368421052632' F='Inh'/><Cell N='XCon' V='0' F='Inh'/></Row></Section><Section N='User'><Row N='visNavOrder'><Cell N='Value' V='29000'/><Cell N='Prompt' V='' F='No Formula'/></Row></Section><Section N='Character'><Row IX='0'><Cell N='Size' V='0.1944444444444444' U='PT'/></Row></Section><Section N='Geometry' IX='0'><Row T='MoveTo' IX='1'><Cell N='X' V='0.125'/></Row><Row T='LineTo' IX='2'><Cell N='X' V='0.125'/><Cell N='Y' V='-0.375'/></Row><Row T='LineTo' IX='3' Del='1'/></Section><Text><cp IX='0'/>Yes
</Text></Shape><Shape ID='137' NameU='Dynamic connector.137' Name='Dynamic connector.137' Type='Shape' Master='2'><Cell N='PinX' V='10.73203125' F='Inh'/><Cell N='PinY' V='4.875' F='Inh'/><Cell N='Width' V='-0.25' F='GUARD(-0.25DL)'/><Cell N='Height' V='0.625' F='GUARD(EndY-BeginY)'/><Cell N='LocPinX' V='-0.125' F='Inh'/><Cell N='LocPinY' V='0.3125' F='Inh'/><Cell N='BeginX' V='10.809375' F='PAR(PNT(Sheet.124!Connections.X2,Sheet.124!Connections.Y2))'/><Cell N='BeginY' V='4.5625' F='PAR(PNT(Sheet.124!Connections.X2,Sheet.124!Connections.Y2))'/><Cell N='EndX' V='10.6546875' F='PAR(PNT(Sheet.47!Connections.X2,Sheet.47!Connections.Y2))'/><Cell N='EndY' V='5.1875' F='PAR(PNT(Sheet.47!Connections.X2,Sheet.47!Connections.Y2))'/><Cell N='LayerMember' V='0'/><Cell N='BegTrigger' V='2' F='_XFTRIGGER(Sheet.124!EventXFMod)'/><Cell N='EndTrigger' V='2' F='_XFTRIGGER(Sheet.47!EventXFMod)'/><Cell N='LineWeight' V='0.0033' U='PT' F='Inh'/><Cell N='LineColor' V='#000000' F='Inh'/><Cell N='EndArrow' V='4' F='Inh'/><Cell N='TxtPinX' V='-0.04660876396648375' F='Inh'/><Cell N='TxtPinY' V='0.3782597843450468' F='Inh'/><Cell N='TxtWidth' V='0.9722222222222221' U='PT' F='Inh'/><Cell N='TxtHeight' V='0.3444924099392361' F='Inh'/><Cell N='TxtLocPinX' V='0.4861111111111111' U='PT' F='Inh'/><Cell N='TxtLocPinY' V='0.1722462049696181' F='Inh'/><Cell N='ShapeShdwShow' V='2'/><Section N='Control'><Row N='TextPosition'><Cell N='X' V='-0.04660876396648375'/><Cell N='Y' V='0.3782597843450468'/><Cell N='XDyn' V='-0.04660876396648375' F='Inh'/><Cell N='YDyn' V='0.3782597843450468' F='Inh'/><Cell N='XCon' V='0' F='Inh'/></Row></Section><Section N='User'><Row N='visNavOrder'><Cell N='Value' V='30000'/><Cell N='Prompt' V='' F='No Formula'/></Row></Section><Section N='Character'><Row IX='0'><Cell N='Size' V='0.1944444444444444' U='PT'/></Row></Section><Section N='Geometry' IX='0'><Row T='MoveTo' IX='1'><Cell N='X' V='-0.04765624999999929'/></Row><Row T='LineTo' IX='2'><Cell N='X' V='0.2023437500000007'/><Cell N='Y' V='0'/></Row><Row T='LineTo' IX='3'><Cell N='X' V='0.2023437500000007'/><Cell N='Y' V='0.625'/></Row><Row T='LineTo' IX='4'><Cell N='X' V='-0.2023437500000007'/><Cell N='Y' V='0.625'/></Row></Section><Text><cp IX='0'/>No
</Text></Shape><Shape ID='138' NameU='Dynamic connector.138' Name='Dynamic connector.138' Type='Shape' Master='2'><Cell N='PinX' V='8.864453125' F='Inh'/><Cell N='PinY' V='6.21875' F='Inh'/><Cell N='Width' V='0.4460937499999957' F='GUARD(EndX-BeginX)'/><Cell N='Height' V='5.687500000000007' F='GUARD(EndY-BeginY)'/><Cell N='LocPinX' V='0.2230468749999979' F='Inh'/><Cell N='LocPinY' V='2.84375' F='Inh'/><Cell N='BeginX' V='8.64140625' F='PAR(PNT(Sheet.131!Connections.X1,Sheet.131!Connections.Y1))'/><Cell N='BeginY' V='3.375' F='PAR(PNT(Sheet.131!Connections.X1,Sheet.131!Connections.Y1))'/><Cell N='EndX' V='9.0875' F='PAR(PNT(Sheet.114!Connections.X1,Sheet.114!Connections.Y1))'/><Cell N='EndY' V='9.062500000000007' F='PAR(PNT(Sheet.114!Connections.X1,Sheet.114!Connections.Y1))'/><Cell N='LayerMember' V='0'/><Cell N='BegTrigger' V='2' F='_XFTRIGGER(Sheet.131!EventXFMod)'/><Cell N='EndTrigger' V='2' F='_XFTRIGGER(Sheet.114!EventXFMod)'/><Cell N='LineWeight' V='0.0033' U='PT' F='Inh'/><Cell N='LineColor' V='#000000' F='Inh'/><Cell N='EndArrow' V='4' F='Inh'/><Cell N='TxtPinX' V='-0.3486920972998177' F='Inh'/><Cell N='TxtPinY' V='3.009468738906631' F='Inh'/><Cell N='TxtWidth' V='0.9722222222222221' U='PT' F='Inh'/><Cell N='TxtHeight' V='0.3444924099392361' F='Inh'/><Cell N='TxtLocPinX' V='0.4861111111111111' U='PT' F='Inh'/><Cell N='TxtLocPinY' V='0.1722462049696181' F='Inh'/><Cell N='ShapeShdwShow' V='2'/><Cell N='ConFixedCode' V='3'/><Section N='Control'><Row N='TextPosition'><Cell N='X' V='-0.3486920972998177'/><Cell N='Y' V='3.009468738906631'/><Cell N='XDyn' V='-0.3486920972998177' F='Inh'/><Cell N='YDyn' V='3.009468738906631' F='Inh'/><Cell N='XCon' V='0' F='Inh'/></Row></Section><Section N='User'><Row N='visNavOrder'><Cell N='Value' V='31000'/><Cell N='Prompt' V='' F='No Formula'/></Row></Section><Section N='Character'><Row IX='0'><Cell N='Size' V='0.1944444444444444' U='PT'/></Row></Section><Section N='Geometry' IX='0'><Row T='LineTo' IX='2'><Cell N='X' V='-0.09973958333333322'/><Cell N='Y' V='0'/></Row><Row T='LineTo' IX='3'><Cell N='X' V='-0.09973958333333322'/><Cell N='Y' V='5.687500000000007'/></Row><Row T='LineTo' IX='4'><Cell N='X' V='0.4460937499999957'/><Cell N='Y' V='5.687500000000007'/></Row></Section><Text><cp IX='0'/>No
</Text></Shape><Shape ID='140' NameU='Dynamic connector.140' Name='Dynamic connector.140' Type='Shape' Master='2'><Cell N='PinX' V='10' F='Inh'/><Cell N='PinY' V='1.90625' F='Inh'/><Cell N='Width' V='0.25' F='GUARD(0.25DL)'/><Cell N='Height' V='-0.25' F='GUARD(-0.25DL)'/><Cell N='LocPinX' V='0.125' F='Inh'/><Cell N='LocPinY' V='-0.125' F='Inh'/><Cell N='BeginX' V='10' F='PAR(PNT(Sheet.45!Connections.X3,Sheet.45!Connections.Y3))'/><Cell N='BeginY' V='2' F='PAR(PNT(Sheet.45!Connections.X3,Sheet.45!Connections.Y3))'/><Cell N='EndX' V='10' F='PAR(PNT(Sheet.48!Connections.X2,Sheet.48!Connections.Y2))'/><Cell N='EndY' V='1.8125' F='PAR(PNT(Sheet.48!Connections.X2,Sheet.48!Connections.Y2))'/><Cell N='LayerMember' V='0'/><Cell N='BegTrigger' V='2' F='_XFTRIGGER(Sheet.45!EventXFMod)'/><Cell N='EndTrigger' V='2' F='_XFTRIGGER(Sheet.48!EventXFMod)'/><Cell N='LineWeight' V='0.0033' U='PT' F='Inh'/><Cell N='LineColor' V='#000000' F='Inh'/><Cell N='EndArrow' V='4' F='Inh'/><Cell N='TxtPinX' V='0.125' F='Inh'/><Cell N='TxtPinY' V='-0.125' F='Inh'/><Section N='Control'><Row N='TextPosition'><Cell N='X' V='0.125'/><Cell N='Y' V='-0.125'/><Cell N='XDyn' V='0.125' F='Inh'/><Cell N='YDyn' V='-0.125' F='Inh'/></Row></Section><Section N='User'><Row N='visNavOrder'><Cell N='Value' V='32000'/><Cell N='Prompt' V='' F='No Formula'/></Row></Section><Section N='Geometry' IX='0'><Row T='MoveTo' IX='1'><Cell N='X' V='0.125'/><Cell N='Y' V='-0.03125'/></Row><Row T='LineTo' IX='2'><Cell N='X' V='0.125'/><Cell N='Y' V='-0.21875'/></Row><Row T='LineTo' IX='3' Del='1'/></Section></Shape></Shapes><Connects><Connect FromSheet='140' FromCell='EndX' FromPart='12' ToSheet='48' ToCell='Connections.X2' ToPart='101'/><Connect FromSheet='140' FromCell='BeginX' FromPart='9' ToSheet='45' ToCell='Connections.X3' ToPart='102'/><Connect FromSheet='138' FromCell='EndX' FromPart='12' ToSheet='114' ToCell='Connections.X1' ToPart='100'/><Connect FromSheet='138' FromCell='BeginX' FromPart='9' ToSheet='131' ToCell='Connections.X1' ToPart='100'/><Connect FromSheet='137' FromCell='EndX' FromPart='12' ToSheet='47' ToCell='Connections.X2' ToPart='101'/><Connect FromSheet='137' FromCell='BeginX' FromPart='9' ToSheet='124' ToCell='Connections.X2' ToPart='101'/><Connect FromSheet='128' FromCell='EndX' FromPart='12' ToSheet='120' ToCell='Connections.X3' ToPart='102'/><Connect FromSheet='128' FromCell='BeginX' FromPart='9' ToSheet='46' ToCell='Connections.X3' ToPart='102'/><Connect FromSheet='127' FromCell='BeginX' FromPart='9' ToSheet='120' ToCell='Connections.X4' ToPart='103'/><Connect FromSheet='126' FromCell='EndX' FromPart='12' ToSheet='124' ToCell='Connections.X3' ToPart='102'/><Connect FromSheet='122' FromCell='EndX' FromPart='12' ToSheet='46' ToCell='Connections.X2' ToPart='101'/><Connect FromSheet='122' FromCell='BeginX' FromPart='9' ToSheet='120' ToCell='Connections.X2' ToPart='101'/><Connect FromSheet='118' FromCell='EndX' FromPart='12' ToSheet='44' ToCell='Connections.X3' ToPart='102'/><Connect FromSheet='118' FromCell='BeginX' FromPart='9' ToSheet='114' ToCell='Connections.X3' ToPart='102'/><Connect FromSheet='49' FromCell='BeginX' FromPart='9' ToSheet='42' ToCell='Connections.X1' ToPart='100'/><Connect FromSheet='49' FromCell='EndX' FromPart='12' ToSheet='43' ToCell='Connections.X4' ToPart='103'/><Connect FromSheet='53' FromCell='BeginX' FromPart='9' ToSheet='44' ToCell='Connections.X2' ToPart='101'/><Connect FromSheet='53' FromCell='EndX' FromPart='12' ToSheet='114' ToCell='Connections.X2' ToPart='101'/><Connect FromSheet='54' FromCell='BeginX' FromPart='9' ToSheet='44' ToCell='Connections.X4' ToPart='103'/><Connect FromSheet='54' FromCell='EndX' FromPart='12' ToSheet='46' ToCell='Connections.X4' ToPart='103'/><Connect FromSheet='115' FromCell='BeginX' FromPart='9' ToSheet='43' ToCell='Connections.X3' ToPart='102'/><Connect FromSheet='115' FromCell='EndX' FromPart='12' ToSheet='114' ToCell='Connections.X4' ToPart='103'/><Connect FromSheet='133' FromCell='EndX' FromPart='12' ToSheet='131' ToCell='PinX' ToPart='3'/><Connect FromSheet='133' FromCell='BeginX' FromPart='9' ToSheet='124' ToCell='PinX' ToPart='3'/><Connect FromSheet='127' FromCell='EndX' FromPart='12' ToSheet='47' ToCell='PinX' ToPart='3'/><Connect FromSheet='126' FromCell='BeginX' FromPart='9' ToSheet='47' ToCell='PinX' ToPart='3'/></Connects></PageContents>
