# Supplementary material for: Adjusting eye aspect ratio for strong eye blink detection based on facial landmarks
Source: PeerJ Comput Sci. 2022 Apr 18;8:e943. doi: 10.7717/peerj-cs.943 (PMC9044337; doi:10.7717/peerj-cs.943)
Supplement: Supplemental Information 8 [file peerj-cs-08-943-s008.vsdx › visio/pages/pages.xml]

<?xml version='1.0' encoding='utf-8' ?>
<Pages xmlns='http://schemas.microsoft.com/office/visio/2012/main' xmlns:r='http://schemas.openxmlformats.org/officeDocument/2006/relationships' xml:space='preserve'><Page ID='12' NameU='VBackground-1' IsCustomNameU='1' Name='VBackground-1' IsCustomName='1' Background='1' ViewScale='-1' ViewCenterX='5.49375' ViewCenterY='4.25'><PageSheet LineStyle='0' FillStyle='0' TextStyle='0'><Cell N='PageWidth' V='16.5'><RefBy T='Page' ID='12'/></Cell><Cell N='PageHeight' V='11'><RefBy T='Page' ID='12'/></Cell><Cell N='ShdwOffsetX' V='0.1181102362204724' U='MM'/><Cell N='ShdwOffsetY' V='-0.1181102362204724' U='MM'/><Cell N='PageScale' V='1' U='IN'/><Cell N='DrawingScale' V='1' U='IN_F'/><Cell N='DrawingSizeType' V='0'/><Cell N='DrawingScaleType' V='0'/><Cell N='InhibitSnap' V='0'/><Cell N='PageLockReplace' V='0' U='BOOL'/><Cell N='PageLockDuplicate' V='0' U='BOOL'/><Cell N='UIVisibility' V='0'/><Cell N='ShdwType' V='0'/><Cell N='ShdwObliqueAngle' V='0'/><Cell N='ShdwScaleFactor' V='1'/><Cell N='DrawingResizeType' V='1'/><Cell N='PageLeftMargin' V='0.25' U='IN'/><Cell N='PageRightMargin' V='0.25' U='IN'/><Cell N='PageTopMargin' V='0.25' U='IN'/><Cell N='PageBottomMargin' V='0.25' U='IN'/><Cell N='PlaceStyle' V='2'/><Cell N='RouteStyle' V='6'/><Cell N='BlockSizeX' V='0.375' U='IN'/><Cell N='BlockSizeY' V='0.375' U='IN'/><Cell N='AvenueSizeX' V='0.5' U='IN'/><Cell N='AvenueSizeY' V='0.5' U='IN'/><Cell N='PageShapeSplit' V='1'/><Cell N='ColorSchemeIndex' V='37'/><Cell N='EffectSchemeIndex' V='37'/><Cell N='ConnectorSchemeIndex' V='37'/><Cell N='FontSchemeIndex' V='37'/><Cell N='ThemeIndex' V='37'/><Section N='User'><Row N='msvVisioCreated'><Cell N='Value' V='0'/><Cell N='Prompt' V=''/></Row></Section></PageSheet><Rel r:id='rId1'/></Page><Page ID='0' NameU='Page-1' Name='Page-1' BackPage='12' ViewScale='1' ViewCenterX='10.989583333333' ViewCenterY='6.96875'><PageSheet LineStyle='0' FillStyle='0' TextStyle='0'><Cell N='PageWidth' V='16.5' U='IN'/><Cell N='PageHeight' V='11' U='IN'/><Cell N='ShdwOffsetX' V='0.1181102362204724' U='MM'/><Cell N='ShdwOffsetY' V='-0.1181102362204724' U='MM'/><Cell N='PageScale' V='1' U='IN'/><Cell N='DrawingScale' V='1' U='IN_F'/><Cell N='DrawingSizeType' V='0'/><Cell N='DrawingScaleType' V='0'/><Trigger N='RecalcColor'><RefBy T='Page' ID='0'/></Trigger><Cell N='InhibitSnap' V='0'/><Cell N='PageLockReplace' V='0' U='BOOL'/><Cell N='PageLockDuplicate' V='0' U='BOOL'/><Cell N='UIVisibility' V='0'/><Cell N='ShdwType' V='0'/><Cell N='ShdwObliqueAngle' V='0'/><Cell N='ShdwScaleFactor' V='1'/><Cell N='DrawingResizeType' V='1'/><Trigger N='ZOrderChanged'><RefBy T='Page' ID='0'/></Trigger><Cell N='PlaceStyle' V='2'/><Cell N='RouteStyle' V='6'/><Cell N='PlaceDepth' V='1'/><Cell N='BlockSizeX' V='0.375' U='IN'/><Cell N='BlockSizeY' V='0.375' U='IN'/><Cell N='AvenueSizeX' V='0.5' U='IN'/><Cell N='AvenueSizeY' V='0.5' U='IN'/><Cell N='PageShapeSplit' V='1'/><Cell N='ColorSchemeIndex' V='37'/><Cell N='EffectSchemeIndex' V='37'/><Cell N='ConnectorSchemeIndex' V='37'/><Cell N='FontSchemeIndex' V='37'/><Cell N='ThemeIndex' V='37'/><Cell N='PageLeftMargin' V='0.25' U='IN'/><Cell N='PageRightMargin' V='0.25' U='IN'/><Cell N='PageTopMargin' V='0.25' U='IN'/><Cell N='PageBottomMargin' V='0.25' U='IN'/><Cell N='XRulerOrigin' V='8'/><Cell N='XGridOrigin' V='8'/><Section N='User'><Row N='visNavType'><Cell N='Value' V='1'/><Cell N='Prompt' V='' F='No Formula'/></Row><Row N='msvThemeOrder'><Cell N='Value' V='0'/><Cell N='Prompt' V='' F='No Formula'/></Row></Section><Section N='Layer'><Row IX='0'><Cell N='Name' V='Connector'/><Cell N='Color' V='255'/><Cell N='Status' V='0'/><Cell N='Visible' V='1'/><Cell N='Print' V='1'/><Cell N='Active' V='0'/><Cell N='Lock' V='0'/><Cell N='Snap' V='1'/><Cell N='Glue' V='1'/><Cell N='NameUniv' V='Connector'/><Cell N='ColorTrans' V='0'/></Row><Row IX='1'><Cell N='Name' V='Flowchart'/><Cell N='Color' V='255'/><Cell N='Status' V='0'/><Cell N='Visible' V='1'/><Cell N='Print' V='1'/><Cell N='Active' V='0'/><Cell N='Lock' V='0'/><Cell N='Snap' V='1'/><Cell N='Glue' V='1'/><Cell N='NameUniv' V='Flowchart'/><Cell N='ColorTrans' V='0'/></Row></Section></PageSheet><Rel r:id='rId2'/></Page></Pages>
