# Supplementary material for: Adjusting eye aspect ratio for strong eye blink detection based on facial landmarks
Source: PeerJ Comput Sci. 2022 Apr 18;8:e943. doi: 10.7717/peerj-cs.943 (PMC9044337; doi:10.7717/peerj-cs.943)
Supplement: Supplemental Information 8 [file peerj-cs-08-943-s008.vsdx › visio/validation.xml]

<?xml version='1.0' encoding='utf-8' ?>
<Validation xmlns='http://schemas.microsoft.com/office/visio/2012/main' xmlns:r='http://schemas.openxmlformats.org/officeDocument/2006/relationships' xml:space='preserve'><ValidationProperties ShowIgnored='0'/><RuleSets><RuleSet ID='1' NameU='Flowchart' Description='Verify that Flowchart shapes are connected properly.'><RuleSetFlags/><Rule ID='1' NameU='UngluedConnector' Category='Connectivity' Description='Connector is not glued at both ends.'><RuleFilter>ROLE()=1</RuleFilter><RuleTest>AND(AGGCOUNT(GLUEDSHAPES(4)) = 1, AGGCOUNT(GLUEDSHAPES(5)) = 1)</RuleTest></Rule><Rule ID='2' NameU='StartWithoutTerminator' Category='Start / End' Description='Flowchart shape has no incoming connectors and is not a Start/End shape.'><RuleFilter>AND(OR(HASCATEGORY("Flowchart"),ONLAYER("Flowchart")),NOT(OR(HASCATEGORY("Start/End"),STRSAME(LEFT(MASTERNAME(750),9),"Start/End"),STRSAME(LEFT(MASTERNAME(750),10),"Terminator"))))</RuleFilter><RuleTest>AGGCOUNT(GLUEDSHAPES(1)) &gt; 0</RuleTest></Rule><Rule ID='3' NameU='EndWithoutTerminator' Category='Start / End' Description='Flowchart shape has no outgoing connectors and is not a Start/End shape.'><RuleFilter>AND(OR(HASCATEGORY("Flowchart"),ONLAYER("Flowchart")),NOT(OR(HASCATEGORY("Start/End"),STRSAME(LEFT(MASTERNAME(750),9),"Start/End"),STRSAME(LEFT(MASTERNAME(750),10),"Terminator"))))</RuleFilter><RuleTest>AGGCOUNT(GLUEDSHAPES(2)) &gt; 0</RuleTest></Rule><Rule ID='4' NameU='NoStartTerminator' Category='Start / End' Description='Flowchart does not start with a Start/End shape.' RuleTarget='1'><RuleFilter>AGGCOUNT(FILTERSET(SHAPESONPAGE(), "OR(HASCATEGORY(""Flowchart""),ONLAYER(""Flowchart""))")) &gt; 0</RuleFilter><RuleTest>AGGCOUNT(FILTERSET(SHAPESONPAGE(), "AND(OR(HASCATEGORY(""Start/End""),STRSAME(LEFT(MASTERNAME(750),9),""Start/End""),STRSAME(LEFT(MASTERNAME(750),10),""Terminator"")),AGGCOUNT(CONNECTEDSHAPES(2))&gt;0)")) &gt; 0</RuleTest></Rule><Rule ID='5' NameU='NoEndTerminator' Category='Start / End' Description='Flowchart does not end with a Start/End shape.' RuleTarget='1'><RuleFilter>AGGCOUNT(FILTERSET(SHAPESONPAGE(), "OR(HASCATEGORY(""Flowchart""),ONLAYER(""Flowchart""))")) &gt; 0</RuleFilter><RuleTest>AGGCOUNT(FILTERSET(SHAPESONPAGE(), "AND(OR(HASCATEGORY(""Start/End""),STRSAME(LEFT(MASTERNAME(750),9),""Start/End""),STRSAME(LEFT(MASTERNAME(750),10),""Terminator"")),AGGCOUNT(CONNECTEDSHAPES(1))&gt;0)")) &gt; 0</RuleTest></Rule><Rule ID='6' NameU='UnconnectedShape' Category='Connectivity' Description='Flowchart shape is not connected to any other shape.'><RuleFilter>OR(HASCATEGORY("Flowchart"),ONLAYER("Flowchart"))</RuleFilter><RuleTest>AGGCOUNT(CONNECTEDSHAPES(0)) &gt; 0</RuleTest></Rule><Rule ID='7' NameU='TerminatorInMiddle' Category='Connectivity' Description='Start/End shape has both incoming and outgoing connectors.'><RuleFilter>OR(HASCATEGORY("Start/End"),STRSAME(LEFT(MASTERNAME(750),9),"Start/End"),STRSAME(LEFT(MASTERNAME(750),10),"Terminator"))</RuleFilter><RuleTest>NOT(AND(AGGCOUNT(CONNECTEDSHAPES(1))&gt;0,AGGCOUNT(CONNECTEDSHAPES(2))&gt;0))</RuleTest></Rule><Rule ID='8' NameU='TooFewOutConns' Category='Connectivity' Description='Decision shape should have more than one outgoing connector.'><RuleFilter>OR(HASCATEGORY("Decision"),STRSAME(LEFT(MASTERNAME(750),8),"Decision"))</RuleFilter><RuleTest>AGGCOUNT(GLUEDSHAPES(2)) &gt; 1</RuleTest></Rule><Rule ID='9' NameU='NonFlowchartShape' Category='Connectivity' Description='Connected shape is not recognized as a Flowchart shape.'><RuleFilter>NOT(OR(HASCATEGORY("Flowchart"),ONLAYER("Flowchart")))</RuleFilter><RuleTest>AGGCOUNT(GLUEDSHAPES(0)) = 0</RuleTest></Rule><Rule ID='10' NameU='NoShapeText' Category='Text' Description='Flowchart shape has no text label.'><RuleFilter>OR(HASCATEGORY("Flowchart"),ONLAYER("Flowchart"))</RuleFilter><RuleTest>NOT(STRSAME(SHAPETEXT(TheText), ""))</RuleTest></Rule><Rule ID='11' NameU='OutsideCFF' Category='Cross - Functional' Description='Flowchart shapes should belong to a Swimlane.' RuleTarget='1'><RuleFilter>AGGCOUNT(FILTERSET(SHAPESONPAGE(),"HASCATEGORY(""Swimlane"")"))&gt;0</RuleFilter><RuleTest>AGGCOUNT(FILTERSET(SHAPESONPAGE(),"AND(OR(HASCATEGORY(""Flowchart""),ONLAYER(""Flowchart"")),AGGCOUNT(FILTERSET(PARENTCONTAINERS(),""HASCATEGORY(""""Swimlane"""")""))=0)"))=0</RuleTest></Rule></RuleSet></RuleSets><Issues/></Validation>
