# Supplementary material for: Adjusting eye aspect ratio for strong eye blink detection based on facial landmarks
Source: PeerJ Comput Sci. 2022 Apr 18;8:e943. doi: 10.7717/peerj-cs.943 (PMC9044337; doi:10.7717/peerj-cs.943)
Supplement: Supplemental Information 8 [file peerj-cs-08-943-s008.vsdx › visio/windows.xml]

<?xml version='1.0' encoding='utf-8' ?>
<Windows ClientWidth='1680' ClientHeight='831' xmlns='http://schemas.microsoft.com/office/visio/2012/main' xmlns:r='http://schemas.openxmlformats.org/officeDocument/2006/relationships' xml:space='preserve'><Window ID='0' WindowType='Drawing' WindowState='1073741824' WindowLeft='-8' WindowTop='-31' WindowWidth='1696' WindowHeight='870' ContainerType='Page' Page='0' ViewScale='1' ViewCenterX='10.989583333333' ViewCenterY='6.96875'><ShowRulers>1</ShowRulers><ShowGrid>0</ShowGrid><ShowPageBreaks>1</ShowPageBreaks><ShowGuides>1</ShowGuides><ShowConnectionPoints>1</ShowConnectionPoints><GlueSettings>9</GlueSettings><SnapSettings>295</SnapSettings><SnapExtensions>34</SnapExtensions><SnapAngles/><DynamicGridEnabled>1</DynamicGridEnabled><TabSplitterPos>0.5</TabSplitterPos></Window><Window ID='1' WindowType='Stencil' WindowState='67109889' WindowLeft='0' WindowTop='-10' WindowWidth='42' WindowHeight='824' Document='C:\Program Files\Microsoft Office\root\Office16\visio content\1033\BASFLO_U.vssx' ParentWindow='0'><StencilGroup>10</StencilGroup><StencilGroupPos>1</StencilGroupPos></Window><Window ID='2' WindowType='Stencil' WindowState='1025' WindowLeft='0' WindowTop='-10' WindowWidth='42' WindowHeight='824' Document='C:\Program Files\Microsoft Office\root\Office16\visio content\1033\XFUNC_U.vssx' ParentWindow='0'><StencilGroup>10</StencilGroup><StencilGroupPos>2</StencilGroupPos></Window></Windows>
